# Supplementary material
Source: publisher figshare collection journal article supplement (https://diabetesjournals.figshare.com/articles/dataset/_/22906517)
Supplement: Supplementary file 1 [file 1]

Supplementary Table S3, related to Figures 4, 5, 6, 7, S5, S6, S7, S8 and S9 . List of ChIP-seq and RNA-seq data sets used in this study.

| References                  | Experiment | Mouse strain                                    | Genotype                                                         | Biological samples                                                     | Antibody                                  | Accession number                                         | Database                                                                                                      | Related figures                                                                                                                             |
|-----------------------------|------------|-------------------------------------------------|------------------------------------------------------------------|------------------------------------------------------------------------|-------------------------------------------|----------------------------------------------------------|---------------------------------------------------------------------------------------------------------------|---------------------------------------------------------------------------------------------------------------------------------------------|
| Lu et al., Cell Metab, 2018 | ChIP-seq   | C57B6/J (8-10 weeks)                            | WT                                                               | Pancreatic islets                                                      | H3K4me3<br>H3K27ac<br>H3K27me3            | GSE110648                                                | Gene expression omnibus ( <a href="https://www.ncbi.nlm.nih.gov/geo/">https://www.ncbi.nlm.nih.gov/geo/</a> ) | Figure 6, Figure 7 and Figure S6<br>Figure 6, Figure 7 and Figure S6<br>Figure 6, Figure 7 and Figure S6                                    |
| This study                  | ChIP-seq   | N/A                                             | N/A                                                              | Min6 cells (DMSO)                                                      | H3K4me3<br>H3K27ac<br>H3K27me3<br>Flag M2 | In progress<br>In progress<br>In progress<br>In progress |                                                                                                               | Figure 6, Figure 7 and Figure S6<br>Figure 6, Figure 7 and Figure S6<br>Figure 6, Figure 7 and Figure S6<br>Figure 7, Figures S7, S8 and S9 |
| This study                  | RNA-seq    | C57B6/J (12 weeks)<br>C57B6/J (12 weeks)<br>N/A | E2f1 <sup>fl/fl</sup> (ctrl)<br>E2f1 <sup>β-/-</sup> (KO)<br>N/A | Pancreatic islets (n=3)<br>Pancreatic islets (n=3)<br>Min6 cells (n=3) | N/A                                       | In progress<br>In progress<br>In progress                |                                                                                                               | Figure 4, Figure 6, Figure 7, Figures S5, S6, S8 and S9<br>Figure 4, Figure 6, Figure 7, Figures S5, S6, S8 and S9<br>Figure 6              |
