# Supplementary material
Source: publisher figshare collection journal article supplement (https://diabetesjournals.figshare.com/articles/dataset/_/22906517)
Supplement: Supplementary file 3 [file 1]

**Supp Table S5. Pathway analysis of RNA-sequencing data in pancreatic islets isolated from control E2f1fl/fl and beta-cell specific E2f1beta<sup>-/-</sup> deficient mice identifies potential upstream regulators associated to E2f1 deficiency.**

| Upstream Regulator            | Expr Log Ratio | Molecule Type                  | Predicted Activation | Activation z-score | p-value of over | Target Molecules in Dataset | Mechanistic N                                                                     |          |
|-------------------------------|----------------|--------------------------------|----------------------|--------------------|-----------------|-----------------------------|-----------------------------------------------------------------------------------|----------|
| TNF                           |                | cytokine                       | Activated            | 6.542              | bias            | 9,24E-35                    | ALGALT,ACOD1,AKR1B10,ALCAM,ALDH2,AMPD3,APOA1,APOBEC3B,ARID5B,B4GALNT1             | 192 (14) |
| IFNG                          |                | cytokine                       | Activated            | 6.621              | bias            | 7,25E-33                    | ACOD1,BCL2L1,BIRC3,BLNK,BMF,BMP6,BST1,C1R,CAMK4,CASP3                             | 199 (18) |
| lipopolysaccharide            |                | chemical drug                  | Activated            | 8,302              | bias            | 3,99E-31                    | ACOD1,ALCAM,ALDH2,AMPD3,ANXA3,APOA1,APOBEC3B,ApofE (includes others),ARHGEF3,BATF | 215 (14) |
| TGFβ1                         |                | growth factor                  | Activated            | 7,75E-23           | bias            | 1,75E-23                    | ADAM1,ALGALT,ARHGEF3,BMP2,BMP4,BMP6,BUB1,C1R,CASP3                                | 235 (19) |
| dexamethasone                 |                | chemical drug                  | Activated            | 1,059              | bias            | 6,77E-23                    | ACOT7,ALAS1,ALCAM,AMIGO2,AMPD3,ANXA3,APOA1,BATF,BCL2L1,BIRC3                      | 222 (15) |
| IL1β                          | 1,038          | cytokine                       | Activated            | 5,905              | bias            | 1,30E-22                    | ALGALT,ACOD1,AMPD3,ANTXR1,BCL2L1,BIRC3,BMF,BMP2,BMP4,C1R                          | 240 (19) |
| NFKBIA                        | 0,623          | transcription regulator        | Activated            | 2,801              | bias            | 9,07E-19                    | ACOD1,AMPD3,APOA1,BCL11A,BCL2L1,BIRC3,BMP2,CNAA2,CD40,CD86                        | 196 (17) |
| TNFSF11                       |                | cytokine                       | Activated            | 5,689              | bias            | 2,84E-18                    | ACOD1,BCL2L1,BMP4,BST1,BIRC3,BMP2,CNAA2,CD40,CD86,CSF3                            | 133 (21) |
| beta-estradiol                |                | chemical - endogenous mamma    | Activated            | 2,051              | bias            | 8,85E-17                    | ACOD1,ALCAM,ANXA3,APOA1,ARID5B,BATF,BCL2L1,BIRC3,BLNK,BMP2                        | 263 (21) |
| CSF2                          |                | cytokine                       | Activated            | 5,651              | bias            | 4,93E-17                    | BCL2L1,BIRC3,BUB1,CASP3,CNAA2,COR7,CD14,CD28,CD40,CD83                            | 232 (17) |
| IL4                           |                | cytokine                       | Activated            | 3,078              | bias            | 5,78E-17                    | ACOD1,ADAM19,ALAS1,ALDH2,ANXA6,B4GALNT1,BCL11A,CAMK1D,CASP3,COR7                  | 187 (16) |
| IKZF1                         |                | transcription regulator        | Inhibited            | 4,354              | bias            | 2,66E-16                    | ADAM19,ANTXR1,BLNK,CAV2,CD86,CD8A,CSF3,DEP1,DOCK1,DOCK4                           |          |
| interleukin A                 |                | chemical drug                  | Activated            | 2,202              | bias            | 7,12E-16                    | ANXA6,BCL11A,BCL2L1,BMP2,BMP4,CASP3,CNAA2,COR7,CD14,CD28                          |          |
| MYD88                         |                | other                          | Activated            | 4,953              | bias            | 1,59E-15                    | ACOD1,APOBEC3B,BATF,CD14,CD40,CD44,CD83,CD86,CEBPB,CSF1                           | 229 (22) |
| HRAS                          |                | enzyme                         | Activated            | -0,331             | bias            | 1,75E-15                    | ANTXR1,ANXA3,ANXA6,BIRC3,BMP4,CNAA2,CD44,CD81,CEBPB,CRM1                          | 223 (19) |
| NFκB (complex)                |                | complex                        | Activated            | 6,136              | bias            | 3,04E-15                    | B4GALT1,BATF,BCL11A,BCL2L1,BIRC3,BMP2,C1R,CCRAR,COR7,CD40                         | 185 (12) |
| decalbine                     |                | chemical drug                  | Activated            | 3,610              | bias            | 6,35E-15                    | BCL11A,BIRC3,BMP4,BTG3,CNAA2,COR7,CD44,CD8A,CD9,CDCA7                             | 219 (20) |
| IKRKB                         |                | kinase                         | Activated            | 3,454              | bias            | 7,53E-15                    | ACOD1,AMPD3,BIRC3,BMP2,CNAA2,COR7,CD44,CEBPB,CP,CSF1                              | 185 (13) |
| cyclosporin A                 |                | biologic drug                  | Activated            | 0,308              | bias            | 9,42E-15                    | ALAS1,ANG,BATF,BIRC3,BMP2,CASP3,COR7,CD14,CD28,CD40,CD44                          | 214 (21) |
| IL10                          |                | cytokine                       | Activated            | 0,825              | bias            | 1,16E-14                    | BCL2L1,BMP2,BMP6,CASP3,COR7,CD14,CD2,CD28,CD40,CD44                               | 180 (19) |
| TICAM1                        |                | other                          | Activated            | 4,566              | bias            | 2,89E-14                    | ACOD1,APOBEC3B,ApofE (includes others),Cg2,CD40,CD86,CEBPB,FAS,GDF15,ICAM1        | 137 (17) |
| IL2                           |                | cytokine                       | Activated            | 5,046              | bias            | 3,44E-14                    | ADAM19,ARHGEF3,Bcl2L1,BIRC3,BMP2,CASP3,COR7,CD2,CD28,CD40                         | 180 (19) |
| IL6                           |                | cytokine                       | Activated            | 4,595              | bias            | 1,19E-13                    | AKR1B10,ALAS1,ANG,APOA1,BATF,BMP2,BMP6,BUB1,CASP3,CNAA2                           | 191 (16) |
| OGA                           |                | enzyme                         | Activated            | -0,434             | bias            | 1,51E-13                    | ADAM19,AHNAK2,CAMK1D,CD14,CD40,CD44,CD86,CD8A,CDCA7,CEBPA                         | 114 (7)  |
| cisplatin                     |                | chemical drug                  | Activated            | 4,037              | bias            | 1,69E-13                    | AHNAK2,BCL2L1,BIRC3,BMP4,CASP3,CD14,CD44,CD86,CEBPA,CLCA1                         | 219 (20) |
| transferrin                   |                | chemical drug                  | Activated            | 3,965              | bias            | 2,95E-13                    | BIRC3,CD14,CD44,CDLNA,CP,LAMC2,MC3,MR1,PSMB10,RCN1                                | 172 (17) |
| poly r(r)-RNA                 |                | biologic drug                  | Activated            | 5,531              | bias            | 7,71E-13                    | ACOD1,ApofE (includes others),BIRC3,BMP2,COR7,CD14,CD40,CD44,CD83,CD86            | 194 (14) |
| fenamic acid                  |                | chemical reagent               | Activated            | 3,959              | bias            | 6,24E-13                    | BIRC3,CD14,CD44,CDLNA,CP,LAMC2,MC3,MR1,PSMB10,RCN1                                |          |
| salmonella minnesota R595 lip |                | chemical - endogenous non-mar  | Activated            | 4,378              | bias            | 7,27E-13                    | ACOD1,Cg2,Cd8,CD83,CD86,CEBPB,FOSL1,GDF15,ICAM1,IL1B                              | 182 (16) |
| immunoglobulin                |                | complex                        | Activated            | 0,524              | bias            | 8,30E-13                    | ADAM19,BATF,BCL2L1,BIRC3,COR7,CD14,CD28,CD40,CD44,CD86                            | 172 (17) |
| CEBPB                         |                | transcription regulator        | Activated            | 4,177              | bias            | 9,07E-13                    | AKR1B10,ANTXR1,BCL2L1,BLNK,CNAA2,CD14,CEBPA,CEBPB,CP,CSF3                         | 204 (20) |
| IKKα                          |                | kinase                         | Activated            | 3,290              | bias            | 1,03E-12                    | ACOD1,AMPD3,BIRC3,BMP2,Cg2,CEBPB,CP,CSF1,CTSZ,CXCL12,CYBA                         | 209 (13) |
| allopurinol                   |                | chemical drug                  | Activated            | 3,637              | bias            | 1,56E-12                    | BIRC3,CD14,CD44,CDLNA,CP,IL1B,LAMC2,MC3,MR1,PSMB10                                |          |
| vancomycin                    |                | biologic drug                  | Activated            | 3,483              | bias            | 2,84E-12                    | BIRC3,CD14,CD44,CDLNA,CP,LAMC2,MC3,MR1,PSMB10,RCN1                                |          |
| STAT3                         |                | transcription regulator        | Activated            | 1,893              | bias            | 3,79E-12                    | BATF,BMF,CASP3,CD40,CD83,CD86,Cg2,CEBPA,CRM1,PSMB10,RCN1                          | 185 (22) |
| KRAS                          |                | enzyme                         | Activated            | 1,188              | bias            | 3,94E-12                    | AKR1B10,BCL2L1,BIRC3,BMP4,CASP3,CAVIN1,CNAA2,CD44,CLIC5,CSF2R8                    | 203 (21) |
| IL1A                          |                | cytokine                       | Activated            | 4,591              | bias            | 4,06E-12                    | BIRC3,Cg2,CD40,CD44,CD83,CD86,Cle2d (includes others),CSF1,CSF3,CXCL12            | 180 (15) |
| resiquimod                    |                | chemical drug                  | Activated            | 3,566              | bias            | 4,58E-12                    | BATF,BCL2L1,Cg2,CD40,CD44,CD83,CD86,Cle2d (includes others),CSF3,CXCL12           | 145 (16) |
| purinomycin aminonucleoside   |                | chemical reagent               | Activated            | 2,621              | bias            | 4,61E-12                    | CD14,CD44,CDLNA,CLIC5,CP,CYBA,GSTP1,LAMC2,MC3,MR1                                 |          |
| progesterone                  |                | chemical - endogenous mamma    | Activated            | 3,040              | bias            | 4,14E-12                    | ACOD1,ALGALT,AMPD3,AMY2A,BIRC3,BMP2,CNAA2,CD40,CD86                               |          |
| doxorubicin                   |                | chemical drug                  | Activated            | 4,451              | bias            | 7,23E-12                    | ANXA6,BCL2L1,BIRC3,BMP4,CASP3,CD14,CD40,CD44,CDLNA,CP                             |          |
| E. coli B5 lipopolysaccharide |                | chemical - endogenous non-mar  | Activated            | 4,073              | bias            | 7,64E-12                    | ALDH2,APOA1,BIRC3,COR7,CD40,CD44,CD83,CD86,CEBPA,CSF3                             | 176 (14) |
| IL33                          |                | cytokine                       | Activated            | 4,282              | bias            | 8,75E-12                    | BCL2L1,BIRC3,Cg2,CD40,CD86,CXCL16,FAS,GADD45B,GATA3,ICAM1                         | 146 (16) |
| EP300                         |                | transcription regulator        | Activated            | 0,647              | bias            | 1,07E-11                    | ANXA6,ARHGEF3,BMF,CAMK4,COR7,CEBPA,CRM1,CRISPLD2,CSF3,DHR53                       | 248 (23) |
| PARP8                         |                | ligand-dependent nuclear recep | Activated            | 1,760              | bias            | 1,07E-11                    | ACOD1,BCL2L1,CAV2,Cg2,CD40,CD44,CD86,CEBPB,CDL12,CYBA                             | 215 (17) |
| CHUK                          |                | kinase                         | Activated            | 4,203              | bias            | 1,69E-11                    | ACOD1,AMPD3,BMP2,Cg2,CEBPB,CP,CSF1,CTSZ,CXCL12,CYBA                               | 192 (14) |
| ZBTB16                        | 3,395          | transcription regulator        | Activated            | 0,209              | bias            | 1,77E-11                    | BMP2,CASP3,CNAA2,CD14,CD2,CD44,CD81,CD83,CD86,CD8A                                | 160 (7)  |
| TP53                          |                | transcription regulator        | Activated            | 4,025              | bias            | 2,85E-11                    | ANTXR1,ANXA3,ANXA6,APOA1,BCL2L1,BIRC3,BMF,BUB1,CASP3,CAV2                         | 229 (22) |
| trichostin                    |                | chemical - endogenous mamma    | Activated            | 4,896              | bias            | 2,89E-11                    | ALAS1,ANXA6,APB1P,ATC9B,BCL2L1,BIRC3,BMP2,BMP4,BMP6,CAMK4                         | 238 (23) |
| COX                           |                | complex                        | Activated            | 4,388              | bias            | 2,94E-11                    | AKR1B10,BMP2,BTG3,CAMK4,Cg2,CEBPA,CEBPB,DMD,FABP5,FAS                             | 238 (22) |
| STAT1                         |                | transcription regulator        | Activated            | 4,251              | bias            | 3,62E-11                    | ACOD1,ALPK1,APOBEC3B,C1R,CASP3,COR7,CD14,CD40,CD86,CEBPB                          | 191 (18) |
| gentamicin C                  |                | chemical drug                  | Activated            | 3,729              | bias            | 4,12E-11                    | BIRC3,CD14,CD44,CDLNA,CP,DMD,LAMC2,MC3,MR1,PSMB10                                 |          |
| imustine                      |                | chemical drug                  | Activated            | 3,742              | bias            | 4,12E-11                    | BIRC3,CD14,CD44,CDLNA,CP,LAMC2,MC3,MR1,SLC34A2,TMEM172                            |          |
| ERK1/2                        |                | group                          | Activated            | 3,30E-11           | bias            | 4,30E-11                    | AKR1B10,BCL2L1,BIRC3,BMP2,COR7,CD40,CD44,CD86,CEBPB,CXCL12                        | 215 (17) |
| Alpha catenin                 |                | group                          | Inhibited            | -4,059             | bias            | 6,41E-11                    | BIRC3,CXCL12,GAP43,IL1B,IL36G,IL6ST,KLK3,LAMA2,LYN,NFKBIA                         | 177 (15) |
| STAT5A                        |                | transcription regulator        | Activated            | 0,745              | bias            | 7,46E-11                    | BCL11A,BCL2L1,BIRC3,CASP3,Cg2,CD86,CEBPA,CSF3,CXCR3,FAS                           | 252 (19) |
| CDM1G                         |                | cytokine                       | Activated            | 3,119              | bias            | 8,19E-11                    | ALGALT,ALCAM,ANXA6,BATF,BCL2L1,BIRC3,BTG3,COR7,CD40,CD44                          | 138 (14) |
| IL10RA                        |                | transmembrane receptor         | Activated            | -1,612             | bias            | 1,20E-10                    | ACOD1,ALDH2,BMP2,BMP4,COR7,CD14,CD83,CD86,FABP5,FAS                               | 177 (15) |
| ID2                           |                | transcription regulator        | Activated            | 0,786              | bias            | 9,43E-11                    | BATF,COR7,CD44,CD83,CSF1,CSF2R8,CXCR3,GADD45B,HOMER2,ICAM1                        | 135 (7)  |
| prostaglandin E2              |                | chemical - endogenous mamma    | Activated            | 4,183              | bias            | 1,07E-10                    | BIRC3,BMP2,CASP3,COR7,CD14,CD40,CD44,CD83,CD86,CEBPB                              | 150 (16) |
| TCF3                          |                | transcription regulator        | Activated            | 1,213              | bias            | 1,08E-10                    | ALCAM,ANXA6,BLNK,BUB1,CASP3,CNAA2,Cg2,Cle2d (includes others),CTRB2,DOCK1         | 30 (2)   |
| ERBB2                         |                | kinase                         | Activated            | 2,690              | bias            | 1,08E-10                    | ALAS1,ALAS1,ANG,ARHGEF3,BUB1,CAVIN1,CNAA2,COR7,CDCA7,CDL12                        | 230 (23) |
| EphA2                         |                | chemical drug                  | Activated            | -1,001             | bias            | 1,10E-10                    | ACOD1,ALAS1,CASP3,Cg2,CD14,CD44,CD86,CEBPB,DFA,FAS,FTL                            | 254 (23) |
| PI3K (complex)                |                | complex                        | Activated            | 3,094              | bias            | 1,29E-10                    | BIRC3,CASP3,Cg2,CD2,CD4,CD86,FABP5,FOSL1,GAP43,GATA3                              | 203 (19) |
| Jnk                           |                | group                          | Activated            | 3,528              | bias            | 1,56E-10                    | BIRC3,BMF,CASP3,Cg2,COR7,CD40,CD44,CD83,CD86,CXCL12                               | 180 (16) |
| methylprednisolone            |                | chemical drug                  | Activated            | 1,908              | bias            | 1,75E-10                    | ALAS1,ANXA3,B4GALNT1,Ca91,CAMK1D,Cg2,CD24,CD44,CD86,DMD                           | 215 (20) |
| CD3                           |                | transcription regulator        | Activated            | 1,909              | bias            | 1,90E-10                    | BATF,COR7,CD44,CD83,CSF1,CSF2R8,CXCR3,GADD45B,HOMER2,ICAM1                        | 174 (11) |
| VCAN                          | 0,768          | other                          | Inhibited            | -1,309             | bias            | 1,98E-10                    | ANG,C1R,BMP2,Cg2,CRISPLD2,CXCL12,CYBA,FABP5,FAS,ICAM1                             | 161 (19) |
| 2-bromomethylamine            |                | chemical reagent               | Activated            | 3,434              | bias            | 2,51E-10                    | CD14,CD44,CDLNA,CP,LAMC2,MC3,MR1,SLC34A2,TMEM173,TNFRSF12A                        |          |
| E. coli B4 lipopolysaccharide |                | chemical toxicant              | Activated            | 3,764              | bias            | 2,62E-10                    | ACOD1,AMPD3,CASP3,Cg2,COR7,CD40,CD83,CD86,CSF3,FAS                                | 183 (17) |
| ethionine                     |                | chemical toxicant              | Activated            | 2,720              | bias            | 2,67E-10                    | CD14,CD44,CP,LAMC2,MC3,PSMB10,SLC34A2,TNFRSF12A,Tpm1,TSPAN8                       |          |
| SP1                           |                | transcription regulator        | Activated            | 3,869              | bias            | 2,80E-10                    | ACOD1,AMPD3,CNAA2,CD40,CD86,CEBPB,CXCL12                                          | 202 (21) |
| CD40                          | 0,881          | transmembrane receptor         | Activated            | 3,352              | bias            | 2,70E-10                    | ALGALT,BCL2L1,BIRC3,CNAA2,CD40,CD44,CD83,CD86,CD8A,CSF1                           | 155 (15) |
| MYB                           |                | transcription regulator        | Activated            | -1,340             | bias            | 3,07E-10                    | BIRC3,BLNK,BMF,Cg2,CD14,CSF3,CXCL12,CXCL16,GATA3,ICAM1                            | 195 (20) |
| ESR1                          |                | ligand-dependent nuclear recep | Activated            | 0,647              | bias            | 3,26E-10                    | ALCAM,ANXA3,APOA1,BIRC3,BMP2,BMP4,BUB1,CAV2,CBL,CNAA2                             | 234 (20) |
| NOTCH1                        |                | transcription regulator        | Activated            | 1,811              | bias            | 3,34E-10                    | CD14,CD44,BIRC3,BMP2,CD14,CD44,CD86,CEBPB,CSF2R8                                  | 186 (15) |
| STAT6                         |                | transcription regulator        | Activated            | 0,107              | bias            | 3,40E-10                    | ADAM19,ALDH2,CAMK1D,Cg2,COR7,CD2,Cg2a4,CD40,DOCK10,EHD2                           | 175 (16) |
| SMARCA4                       |                | transcription regulator        | Activated            | 3,591              | bias            | 3,78E-10                    | ALDH2,ANTXR2,APOA1,BATF,BCL2L1,BMP4,CASP3,CNAA2,CD44,CP                           | 228 (20) |
| SP1                           |                | transcription regulator        | Activated            | 2,737              | bias            | 3,91E-10                    | BCL11A,BLNK,CNAA2,COR7,CD14,CD86,CEBPA,CSF1,CSF2R8,FTH1                           | 178 (20) |
| Interferon alpha              |                | group                          | Activated            | 3,825              | bias            | 3,99E-10                    | ALGALT,ADAM19,APOBEC3B,BCL2L1,BMP4,CASP3,COR7,CD40,CD81,CD83                      | 172 (17) |
| BCL6                          |                | transcription regulator        | Activated            | 1,448              | bias            | 4,44E-10                    | ALCAM,ANXA6,BCL2L1,BLNK,Cg2,COR7,CD14,CD86,CEBPB,DOCK10                           | 177 (17) |
| IL3                           |                | cytokine                       | Activated            | 3,459              | bias            | 7,60E-10                    | ALDH2,BIRC3,BMP2,CASP3,CD14,CD44,CD83,CD86,CSF1,CSF3                              | 156 (17) |
| bleomycin                     |                | chemical drug                  | Activated            | 4,260              | bias            | 8,81E-10                    | BMP4,CASP3,Cg2,Cd8,CD86,CD86,CEBPA,CXCL12,FAS,FOSL1                               | 233 (19) |
| ADR8                          |                | group                          | Inhibited            | -3,154             | bias            | 9,41E-10                    | ARHGEF3,CASP3,Cg2,CNAA2,CD40,CD86,CLEC4D,FAS,GDF15,GSTA3                          | 209 (22) |
| CREBBP                        |                | transcription regulator        | Activated            | 3,339              | bias            | 9,93E-10                    | ALAS1,ANXA6,ARHGEF3,CAMK4,COR7,CD14,CD86,CEBPB,CLIC5,CSF1                         | 235 (19) |
| tetracyclinepyrrolol acetate  |                | chemical drug                  | Activated            | 4,834              | bias            | 1,01E-09                    | ANTXR1,ALAS1,AMIGO2,APOBEC3B,BCL2L1,BIRC3,BMF,CAV2,CNAA2,CSF1                     | 235 (19) |
| NR3C1                         |                | ligand-dependent nuclear recep | Activated            | -0,977             | bias            | 1,05E-09                    | AMIGO2,ARHGEF3,BIRC3,BMF,BMP2,C1R,CD83,CEBPA,CORO2A,CYP3A7                        | 238 (21) |
| ATF3                          |                | transcription regulator        | Inhibited            | -2,496             | bias            | 1,25E-09                    | BIRC3,CD83,CXCL16,FBP1,G8P6,HSPB1,ICAM1,JD1,IL1B,JUN                              | 224 (19) |
| IL13                          |                | cytokine                       | Activated            | 3,073              | bias            | 1,26E-09                    | BATF,BCL2L1,Cg2,COR7,CD14,CD40,CD86,CEBPA,CSF1,CLCA1                              | 178 (20) |
| TCR                           |                | complex                        | Activated            | 2,634              | bias            | 1,33E-09                    | BATF,BAT1,BIRC3,COR7,CD28,CD44,CD86,CXCR3,FAS,GADD45B                             | 170 (20) |
| KLF2                          |                | transcription regulator        | Activated            | -1,899             | bias            | 1,42E-09                    | BMP4,Cg2,COR7,CD40,CD44,CD86,CEBPA,CXCR3,IO1,IO3                                  | 194 (19) |
| APOE                          |                | transporter                    | Activated            | -1,448             | bias            | 1,46E-09                    | APOA1,BMP4,CASP3,CCRAR,CD40,CD44,CD86,CD86,CSF1,CSR1P                             | 156 (16) |
| Cg oligonucleotide            |                | chemical drug                  | Activated            | 3,749              | bias            | 1,48E-09                    | BCL2L1,CD14,CD44,CD83,CD86,CLEC4D,FAS,G8P6,Glycylat,ICAM1                         | 180 (22) |
| JUN                           |                | transcription regulator        | Activated            | 1,494              | bias            | 1,49E-09                    | ALAS1,BCL2L1,BIRC3,Cg2,CNAA2,CD14,CD86,CEBPB,CSF1,CXCL16                          | 121 (21) |
| resiquizone                   | 0,556          | chemical drug                  | Activated            | 2,010              | bias            | 1,49E-09                    | CASP3,CAV2,CCRAR,Cg2,Cd8,CD86,CD86,CEBPA,CSF1,DHR53                               | 207 (21) |
| PDGF BB                       |                | complex                        | Activated            | 3,317              | bias            | 1,56E-09                    | BMP4,BMP6,CAV2,Cg2,CD44,CEBPB,CP,CSF1,CSF3,ENPP1                                  | 216 (22) |
| LY294002                      |                | chemical - kinase inhibitor    | Inhibited            | -3,867             | bias            | 1,62E-09                    | BIRC3,BMP2,CASP3,CNAA2,CD14,CD44,CD83,CD86,CEBPA,CDLNA                            | 198 (16) |
| hexachlorobenzene             |                | chemical - kinase inhibitor    | Activated            | 3,464              | bias            | 1,65E-09                    | CD14,CD44,CP,LAMC2,MR1,PSMB10,RCN1,SLC34A2,TNFRSF12A,TSPAN8                       |          |
| lge                           |                | complex                        | Activated            | 1,897              | bias            | 1,78E-09                    | BATF,BCL2L1,CD2,Cg2,CD40,CD86,CSF3,GDF15,FAS,GADD45B                              | 155 (17) |
| APP                           |                | other                          | Activated            | 1,618              | bias            | 1,83E-09                    | ADAM19,ANXA6,BASP1,BMP,BMP4,BMP6,C1R,CASP3,CD40,CD44                              | 220 (17) |
| GF1                           |                | transcription regulator        | Inhibited            | -3,260             | bias            | 1,85E-09                    | ANXA6,Cg2,COR7,CD40,CEBPA,CSF1,GATA3,GZMA,ICAM1,IL1B                              | 134 (13) |
| amphotericin                  |                | transcription regulator        | Activated            | 1,879              | bias            | 1,89E-09                    | BCL11A,BCL2L1,BIRC3,BTG3,CASP3,CD40,CD83,CD86,CSF1,FAS                            | 170 (15) |
| IL1RA                         |                | transmembrane receptor         | Activated            | 1,624              | bias            | 1,93E-09                    | APOBEC3B,BATF,BMP2,COR7,CD14,CD44,CD86,CEBPB,CSF3                                 | 170 (15) |
| DUSP1                         |                | phosphatase                    | Activated            | -0,961             | bias            | 2,04E-09                    | BMP2,Cg2,CD40,CD86,FOSL1,GDF15,GJ2,ICAM1,IL1B,JUN                                 | 210 (24) |
| F2                            |                | peptidase                      | Activated            | 4,789              | bias            | 2,16E-09                    | B4GALT1,BIRC3,CASP3,Cg2,CNAA2,CD44,CD86,CDCA2EP1,DOCK10,FOSL1                     | 168 (15) |
| 5-O-methyl-beta-araf-1->2-5,4 |                | chemical - endogenous non-mar  | Activated            | 3,695              | bias            | 2,20E-09                    | BCL2L1,COR7,CD40,CD44,CD83,ICAM1,IL1B,MGLL,NFKB1,RND3                             | 174 (13) |
| IL17A                         |                | cytokine                       | Activated            | 3,673              | bias            | 2,21E-09                    | BCL2L1,Cg2,Cd8,CD14,CD86,CD86,HLA-A,ICAM1,IL1B,IRAK3,JAG1                         | 144 (15) |
| lactonin                      |                | chemical drug                  |                      |                    |                 |                             |                                                                                   |          |

|                               |  |                               |           |          |      |          |                                                                                                                                                                                                                                                                                                                                                                                                                                                                                                                                                                                                                                                                                                                                                                                                                                                                                                                                                                                                                                                                                                                                                                                                                                                                                                                                                                                                                                                                                                                                                                                                                                                                                                                                                                                                                                                                                                                                                                                                                                                                                                                                                                                                                                                                                                                                                                                                                                                                                                                                                                                                                                                                                                                                                                                                                                                                                                                                                                                                                                                                                                                                                                                                                                                                                                                                                                                                                                                                                                                                                                                                                                                                                                                                                                                                                                                                                                                                                                                                                                                                                                                                                                                                                                                                                                                                                                                                                                                                                                                                                                                                                                                                                                                                                                                                                                                                                                                                                                                                                |     |     |
|-------------------------------|--|-------------------------------|-----------|----------|------|----------|----------------------------------------------------------------------------------------------------------------------------------------------------------------------------------------------------------------------------------------------------------------------------------------------------------------------------------------------------------------------------------------------------------------------------------------------------------------------------------------------------------------------------------------------------------------------------------------------------------------------------------------------------------------------------------------------------------------------------------------------------------------------------------------------------------------------------------------------------------------------------------------------------------------------------------------------------------------------------------------------------------------------------------------------------------------------------------------------------------------------------------------------------------------------------------------------------------------------------------------------------------------------------------------------------------------------------------------------------------------------------------------------------------------------------------------------------------------------------------------------------------------------------------------------------------------------------------------------------------------------------------------------------------------------------------------------------------------------------------------------------------------------------------------------------------------------------------------------------------------------------------------------------------------------------------------------------------------------------------------------------------------------------------------------------------------------------------------------------------------------------------------------------------------------------------------------------------------------------------------------------------------------------------------------------------------------------------------------------------------------------------------------------------------------------------------------------------------------------------------------------------------------------------------------------------------------------------------------------------------------------------------------------------------------------------------------------------------------------------------------------------------------------------------------------------------------------------------------------------------------------------------------------------------------------------------------------------------------------------------------------------------------------------------------------------------------------------------------------------------------------------------------------------------------------------------------------------------------------------------------------------------------------------------------------------------------------------------------------------------------------------------------------------------------------------------------------------------------------------------------------------------------------------------------------------------------------------------------------------------------------------------------------------------------------------------------------------------------------------------------------------------------------------------------------------------------------------------------------------------------------------------------------------------------------------------------------------------------------------------------------------------------------------------------------------------------------------------------------------------------------------------------------------------------------------------------------------------------------------------------------------------------------------------------------------------------------------------------------------------------------------------------------------------------------------------------------------------------------------------------------------------------------------------------------------------------------------------------------------------------------------------------------------------------------------------------------------------------------------------------------------------------------------------------------------------------------------------------------------------------------------------------------------------------------------------------------------------------------------------------------------------|-----|-----|
| FNB1                          |  | cytokine                      | Activated | 2.766    | bias | 5.54E-08 | ACOD1 ApolF6 (includes others) CASP3 Cc2, CD14, CD24a, CD40, CD83, CD86, GBP6                                                                                                                                                                                                                                                                                                                                                                                                                                                                                                                                                                                                                                                                                                                                                                                                                                                                                                                                                                                                                                                                                                                                                                                                                                                                                                                                                                                                                                                                                                                                                                                                                                                                                                                                                                                                                                                                                                                                                                                                                                                                                                                                                                                                                                                                                                                                                                                                                                                                                                                                                                                                                                                                                                                                                                                                                                                                                                                                                                                                                                                                                                                                                                                                                                                                                                                                                                                                                                                                                                                                                                                                                                                                                                                                                                                                                                                                                                                                                                                                                                                                                                                                                                                                                                                                                                                                                                                                                                                                                                                                                                                                                                                                                                                                                                                                                                                                                                                                  | 168 | 18  |
| MAP3K9                        |  | kinase                        |           | 1.545    | bias | 5.85E-08 | BIRC3, BMP4, Cc2, DMD, FAS, FOSL1, GADD45B, HMG1, IF16, IL1B                                                                                                                                                                                                                                                                                                                                                                                                                                                                                                                                                                                                                                                                                                                                                                                                                                                                                                                                                                                                                                                                                                                                                                                                                                                                                                                                                                                                                                                                                                                                                                                                                                                                                                                                                                                                                                                                                                                                                                                                                                                                                                                                                                                                                                                                                                                                                                                                                                                                                                                                                                                                                                                                                                                                                                                                                                                                                                                                                                                                                                                                                                                                                                                                                                                                                                                                                                                                                                                                                                                                                                                                                                                                                                                                                                                                                                                                                                                                                                                                                                                                                                                                                                                                                                                                                                                                                                                                                                                                                                                                                                                                                                                                                                                                                                                                                                                                                                                                                   | 216 | 218 |
| 15-deoxy-delta12,14 -PGU 2    |  | chemical - endogenous mammal  |           | 0.233    | bias | 5.86E-08 | BIRC3, CASP3, CAV2, Cc2, CEPBD, FTL1, GDF15, GSTP1, HSPB1, ICAM1                                                                                                                                                                                                                                                                                                                                                                                                                                                                                                                                                                                                                                                                                                                                                                                                                                                                                                                                                                                                                                                                                                                                                                                                                                                                                                                                                                                                                                                                                                                                                                                                                                                                                                                                                                                                                                                                                                                                                                                                                                                                                                                                                                                                                                                                                                                                                                                                                                                                                                                                                                                                                                                                                                                                                                                                                                                                                                                                                                                                                                                                                                                                                                                                                                                                                                                                                                                                                                                                                                                                                                                                                                                                                                                                                                                                                                                                                                                                                                                                                                                                                                                                                                                                                                                                                                                                                                                                                                                                                                                                                                                                                                                                                                                                                                                                                                                                                                                                               | 227 | 222 |
| asvatrol                      |  | chemical drug                 |           | 0.598    |      | 5.90E-08 | BLZ2A1, BIRC3, BMP2, CASP3, Cc2, CD4, CD8, FAS, FOSL1, GDF15                                                                                                                                                                                                                                                                                                                                                                                                                                                                                                                                                                                                                                                                                                                                                                                                                                                                                                                                                                                                                                                                                                                                                                                                                                                                                                                                                                                                                                                                                                                                                                                                                                                                                                                                                                                                                                                                                                                                                                                                                                                                                                                                                                                                                                                                                                                                                                                                                                                                                                                                                                                                                                                                                                                                                                                                                                                                                                                                                                                                                                                                                                                                                                                                                                                                                                                                                                                                                                                                                                                                                                                                                                                                                                                                                                                                                                                                                                                                                                                                                                                                                                                                                                                                                                                                                                                                                                                                                                                                                                                                                                                                                                                                                                                                                                                                                                                                                                                                                   | 179 | 177 |
| labetalol-regionalle          |  | chemical drug                 |           | 1.668    | bias | 6.38E-08 | CD40, CD86, FABP5, FAS, ICAM1, LY75                                                                                                                                                                                                                                                                                                                                                                                                                                                                                                                                                                                                                                                                                                                                                                                                                                                                                                                                                                                                                                                                                                                                                                                                                                                                                                                                                                                                                                                                                                                                                                                                                                                                                                                                                                                                                                                                                                                                                                                                                                                                                                                                                                                                                                                                                                                                                                                                                                                                                                                                                                                                                                                                                                                                                                                                                                                                                                                                                                                                                                                                                                                                                                                                                                                                                                                                                                                                                                                                                                                                                                                                                                                                                                                                                                                                                                                                                                                                                                                                                                                                                                                                                                                                                                                                                                                                                                                                                                                                                                                                                                                                                                                                                                                                                                                                                                                                                                                                                                            | 122 | 103 |
| IL12 (complex)                |  | complex                       |           | 1.642    | bias | 7.56E-08 | CASP3, Cc2, CCR7, CD28, CD44, CD86, CSF1, CXCR3, FAS, GADD45B                                                                                                                                                                                                                                                                                                                                                                                                                                                                                                                                                                                                                                                                                                                                                                                                                                                                                                                                                                                                                                                                                                                                                                                                                                                                                                                                                                                                                                                                                                                                                                                                                                                                                                                                                                                                                                                                                                                                                                                                                                                                                                                                                                                                                                                                                                                                                                                                                                                                                                                                                                                                                                                                                                                                                                                                                                                                                                                                                                                                                                                                                                                                                                                                                                                                                                                                                                                                                                                                                                                                                                                                                                                                                                                                                                                                                                                                                                                                                                                                                                                                                                                                                                                                                                                                                                                                                                                                                                                                                                                                                                                                                                                                                                                                                                                                                                                                                                                                                  | 153 | 165 |
| methyleneselenic acid         |  | chemical reagent              |           | 7.65E-08 |      |          | B4GALT1, BCL2A1, BIRC3, BMP4, CAMK4, CNA2, CD44, GDF15, ID1, ID3                                                                                                                                                                                                                                                                                                                                                                                                                                                                                                                                                                                                                                                                                                                                                                                                                                                                                                                                                                                                                                                                                                                                                                                                                                                                                                                                                                                                                                                                                                                                                                                                                                                                                                                                                                                                                                                                                                                                                                                                                                                                                                                                                                                                                                                                                                                                                                                                                                                                                                                                                                                                                                                                                                                                                                                                                                                                                                                                                                                                                                                                                                                                                                                                                                                                                                                                                                                                                                                                                                                                                                                                                                                                                                                                                                                                                                                                                                                                                                                                                                                                                                                                                                                                                                                                                                                                                                                                                                                                                                                                                                                                                                                                                                                                                                                                                                                                                                                                               | 241 | 222 |
| NFKB1                         |  | transcription regulator       | Activated | 2.882    | bias | 7.73E-08 | CD14, BIRC3, BMP2, Cc2, CD40, CD86, CEPBA, CSF1, FAS, GATA3                                                                                                                                                                                                                                                                                                                                                                                                                                                                                                                                                                                                                                                                                                                                                                                                                                                                                                                                                                                                                                                                                                                                                                                                                                                                                                                                                                                                                                                                                                                                                                                                                                                                                                                                                                                                                                                                                                                                                                                                                                                                                                                                                                                                                                                                                                                                                                                                                                                                                                                                                                                                                                                                                                                                                                                                                                                                                                                                                                                                                                                                                                                                                                                                                                                                                                                                                                                                                                                                                                                                                                                                                                                                                                                                                                                                                                                                                                                                                                                                                                                                                                                                                                                                                                                                                                                                                                                                                                                                                                                                                                                                                                                                                                                                                                                                                                                                                                                                                    | 203 | 144 |
| gemisin1                      |  | chemical drug                 |           | 1.628    | bias | 7.94E-08 | ALAS1, APOA1, BMP2, BTG3, CASP3, CD44, CD86, CEPBA, CXCL12                                                                                                                                                                                                                                                                                                                                                                                                                                                                                                                                                                                                                                                                                                                                                                                                                                                                                                                                                                                                                                                                                                                                                                                                                                                                                                                                                                                                                                                                                                                                                                                                                                                                                                                                                                                                                                                                                                                                                                                                                                                                                                                                                                                                                                                                                                                                                                                                                                                                                                                                                                                                                                                                                                                                                                                                                                                                                                                                                                                                                                                                                                                                                                                                                                                                                                                                                                                                                                                                                                                                                                                                                                                                                                                                                                                                                                                                                                                                                                                                                                                                                                                                                                                                                                                                                                                                                                                                                                                                                                                                                                                                                                                                                                                                                                                                                                                                                                                                                     | 190 | 211 |
| YGE                           |  | other                         |           | 1.137    | bias | 8.35E-08 | CD14, CD83, IL1B, IRAK2, NFKB1, RELB, SERPINE1                                                                                                                                                                                                                                                                                                                                                                                                                                                                                                                                                                                                                                                                                                                                                                                                                                                                                                                                                                                                                                                                                                                                                                                                                                                                                                                                                                                                                                                                                                                                                                                                                                                                                                                                                                                                                                                                                                                                                                                                                                                                                                                                                                                                                                                                                                                                                                                                                                                                                                                                                                                                                                                                                                                                                                                                                                                                                                                                                                                                                                                                                                                                                                                                                                                                                                                                                                                                                                                                                                                                                                                                                                                                                                                                                                                                                                                                                                                                                                                                                                                                                                                                                                                                                                                                                                                                                                                                                                                                                                                                                                                                                                                                                                                                                                                                                                                                                                                                                                 | 190 | 211 |
| IGF1                          |  | growth factor                 | Activated | 2.917    | bias | 9.84E-08 | BLZ2A1, BIRC3, BMP2, BMP4, CASP3, CNA2, CD44, CEPBD, CSF1, CYBA                                                                                                                                                                                                                                                                                                                                                                                                                                                                                                                                                                                                                                                                                                                                                                                                                                                                                                                                                                                                                                                                                                                                                                                                                                                                                                                                                                                                                                                                                                                                                                                                                                                                                                                                                                                                                                                                                                                                                                                                                                                                                                                                                                                                                                                                                                                                                                                                                                                                                                                                                                                                                                                                                                                                                                                                                                                                                                                                                                                                                                                                                                                                                                                                                                                                                                                                                                                                                                                                                                                                                                                                                                                                                                                                                                                                                                                                                                                                                                                                                                                                                                                                                                                                                                                                                                                                                                                                                                                                                                                                                                                                                                                                                                                                                                                                                                                                                                                                                | 215 | 211 |
| SMAD3                         |  | transcription regulator       | Activated | 1.652    | bias | 1.00E-07 | APOA1, BMP2, BMP6, Cc2, CRISPLD2, DCLKA, GADD45B, GATA3, GZMA, Hamp/Hamp2                                                                                                                                                                                                                                                                                                                                                                                                                                                                                                                                                                                                                                                                                                                                                                                                                                                                                                                                                                                                                                                                                                                                                                                                                                                                                                                                                                                                                                                                                                                                                                                                                                                                                                                                                                                                                                                                                                                                                                                                                                                                                                                                                                                                                                                                                                                                                                                                                                                                                                                                                                                                                                                                                                                                                                                                                                                                                                                                                                                                                                                                                                                                                                                                                                                                                                                                                                                                                                                                                                                                                                                                                                                                                                                                                                                                                                                                                                                                                                                                                                                                                                                                                                                                                                                                                                                                                                                                                                                                                                                                                                                                                                                                                                                                                                                                                                                                                                                                      | 199 | 209 |
| VEGFA                         |  | growth factor                 | Activated | 2.219    | bias | 1.02E-07 | ALAS1, ALDH2, BATF, BCL2A1, BMP2, BMP4, CASP3, CD40, CD83, CD86                                                                                                                                                                                                                                                                                                                                                                                                                                                                                                                                                                                                                                                                                                                                                                                                                                                                                                                                                                                                                                                                                                                                                                                                                                                                                                                                                                                                                                                                                                                                                                                                                                                                                                                                                                                                                                                                                                                                                                                                                                                                                                                                                                                                                                                                                                                                                                                                                                                                                                                                                                                                                                                                                                                                                                                                                                                                                                                                                                                                                                                                                                                                                                                                                                                                                                                                                                                                                                                                                                                                                                                                                                                                                                                                                                                                                                                                                                                                                                                                                                                                                                                                                                                                                                                                                                                                                                                                                                                                                                                                                                                                                                                                                                                                                                                                                                                                                                                                                | 166 | 177 |
| lyseronic acid                |  | chemical - endogenous mammal  | Activated | 2.762    | bias | 1.05E-07 | Cc2, CCR7, CD40, CD44, CD83, CD86, ICAM1, IL1B, IRAK3, IRF5                                                                                                                                                                                                                                                                                                                                                                                                                                                                                                                                                                                                                                                                                                                                                                                                                                                                                                                                                                                                                                                                                                                                                                                                                                                                                                                                                                                                                                                                                                                                                                                                                                                                                                                                                                                                                                                                                                                                                                                                                                                                                                                                                                                                                                                                                                                                                                                                                                                                                                                                                                                                                                                                                                                                                                                                                                                                                                                                                                                                                                                                                                                                                                                                                                                                                                                                                                                                                                                                                                                                                                                                                                                                                                                                                                                                                                                                                                                                                                                                                                                                                                                                                                                                                                                                                                                                                                                                                                                                                                                                                                                                                                                                                                                                                                                                                                                                                                                                                    | 183 | 183 |
| l-lysyl-L-lysine methyl ester |  | chemical drug                 |           | 1.439    | bias | 1.05E-07 | CASP3, Cc2, CD86, CD83, CD86, CSF1, CYBA, FAS, ICAM1, IL1B, IL4, IL8                                                                                                                                                                                                                                                                                                                                                                                                                                                                                                                                                                                                                                                                                                                                                                                                                                                                                                                                                                                                                                                                                                                                                                                                                                                                                                                                                                                                                                                                                                                                                                                                                                                                                                                                                                                                                                                                                                                                                                                                                                                                                                                                                                                                                                                                                                                                                                                                                                                                                                                                                                                                                                                                                                                                                                                                                                                                                                                                                                                                                                                                                                                                                                                                                                                                                                                                                                                                                                                                                                                                                                                                                                                                                                                                                                                                                                                                                                                                                                                                                                                                                                                                                                                                                                                                                                                                                                                                                                                                                                                                                                                                                                                                                                                                                                                                                                                                                                                                           | 141 | 161 |
| PTGER4                        |  | G-protein coupled receptor    |           | -1.207   |      | 1.06E-07 | Cc2, CCR7, CD40, CD44, CP, GABR1, GBP6, H2-M2, ICAM1, IF16                                                                                                                                                                                                                                                                                                                                                                                                                                                                                                                                                                                                                                                                                                                                                                                                                                                                                                                                                                                                                                                                                                                                                                                                                                                                                                                                                                                                                                                                                                                                                                                                                                                                                                                                                                                                                                                                                                                                                                                                                                                                                                                                                                                                                                                                                                                                                                                                                                                                                                                                                                                                                                                                                                                                                                                                                                                                                                                                                                                                                                                                                                                                                                                                                                                                                                                                                                                                                                                                                                                                                                                                                                                                                                                                                                                                                                                                                                                                                                                                                                                                                                                                                                                                                                                                                                                                                                                                                                                                                                                                                                                                                                                                                                                                                                                                                                                                                                                                                     | 193 | 193 |
| dextran sulfate               |  | chemical drug                 |           | 1.012    | bias | 1.07E-07 | BUB1, Cc2, CD8, CNA2, CD14, CD40, CD83, CD86, CSF3, ICAM1                                                                                                                                                                                                                                                                                                                                                                                                                                                                                                                                                                                                                                                                                                                                                                                                                                                                                                                                                                                                                                                                                                                                                                                                                                                                                                                                                                                                                                                                                                                                                                                                                                                                                                                                                                                                                                                                                                                                                                                                                                                                                                                                                                                                                                                                                                                                                                                                                                                                                                                                                                                                                                                                                                                                                                                                                                                                                                                                                                                                                                                                                                                                                                                                                                                                                                                                                                                                                                                                                                                                                                                                                                                                                                                                                                                                                                                                                                                                                                                                                                                                                                                                                                                                                                                                                                                                                                                                                                                                                                                                                                                                                                                                                                                                                                                                                                                                                                                                                      | 154 | 177 |
| tigoglossine                  |  | microRNA                      |           | 0.784    |      | 1.14E-07 | ALAS1, BIRC3, Cag1, CAV2, Cc2, CD86, CEPBA, CEPB, CYP3A7, DHR53                                                                                                                                                                                                                                                                                                                                                                                                                                                                                                                                                                                                                                                                                                                                                                                                                                                                                                                                                                                                                                                                                                                                                                                                                                                                                                                                                                                                                                                                                                                                                                                                                                                                                                                                                                                                                                                                                                                                                                                                                                                                                                                                                                                                                                                                                                                                                                                                                                                                                                                                                                                                                                                                                                                                                                                                                                                                                                                                                                                                                                                                                                                                                                                                                                                                                                                                                                                                                                                                                                                                                                                                                                                                                                                                                                                                                                                                                                                                                                                                                                                                                                                                                                                                                                                                                                                                                                                                                                                                                                                                                                                                                                                                                                                                                                                                                                                                                                                                                | 207 | 222 |
| ion dextran                   |  | chemical drug                 |           | 2.391    | bias | 1.16E-07 | ALCALM, AMPK2, BIST1, Cc2, CD4, CD8, CD86, CSF1, HPDGS, ICAM1, IF16, IL1B, MCTP2                                                                                                                                                                                                                                                                                                                                                                                                                                                                                                                                                                                                                                                                                                                                                                                                                                                                                                                                                                                                                                                                                                                                                                                                                                                                                                                                                                                                                                                                                                                                                                                                                                                                                                                                                                                                                                                                                                                                                                                                                                                                                                                                                                                                                                                                                                                                                                                                                                                                                                                                                                                                                                                                                                                                                                                                                                                                                                                                                                                                                                                                                                                                                                                                                                                                                                                                                                                                                                                                                                                                                                                                                                                                                                                                                                                                                                                                                                                                                                                                                                                                                                                                                                                                                                                                                                                                                                                                                                                                                                                                                                                                                                                                                                                                                                                                                                                                                                                               | 207 | 222 |
| ADCYAP1                       |  | other                         |           | 0.192    |      | 1.19E-07 | BMP6, Cc2, Hamp/Hamp2, ID1, IL1B, NFKBIA                                                                                                                                                                                                                                                                                                                                                                                                                                                                                                                                                                                                                                                                                                                                                                                                                                                                                                                                                                                                                                                                                                                                                                                                                                                                                                                                                                                                                                                                                                                                                                                                                                                                                                                                                                                                                                                                                                                                                                                                                                                                                                                                                                                                                                                                                                                                                                                                                                                                                                                                                                                                                                                                                                                                                                                                                                                                                                                                                                                                                                                                                                                                                                                                                                                                                                                                                                                                                                                                                                                                                                                                                                                                                                                                                                                                                                                                                                                                                                                                                                                                                                                                                                                                                                                                                                                                                                                                                                                                                                                                                                                                                                                                                                                                                                                                                                                                                                                                                                       |     |     |
| bee venom                     |  | chemical - endogenous non-man |           | 0.507    | bias | 1.19E-07 | 110009, J06R6K, Gm2653, BMP6, CAMK4, Cc2, Cc2, CDNA, CD40, CD86, CEPBD, GAP43, GATA3                                                                                                                                                                                                                                                                                                                                                                                                                                                                                                                                                                                                                                                                                                                                                                                                                                                                                                                                                                                                                                                                                                                                                                                                                                                                                                                                                                                                                                                                                                                                                                                                                                                                                                                                                                                                                                                                                                                                                                                                                                                                                                                                                                                                                                                                                                                                                                                                                                                                                                                                                                                                                                                                                                                                                                                                                                                                                                                                                                                                                                                                                                                                                                                                                                                                                                                                                                                                                                                                                                                                                                                                                                                                                                                                                                                                                                                                                                                                                                                                                                                                                                                                                                                                                                                                                                                                                                                                                                                                                                                                                                                                                                                                                                                                                                                                                                                                                                                           | 167 | 187 |
| LR3                           |  | complex                       | Activated | 3.548    | bias | 1.22E-07 | ACOD1, Cc2, HSPB1, ICAM1, IL1B, JUN, KLF4, LCP2, LPN2, NFKBIA                                                                                                                                                                                                                                                                                                                                                                                                                                                                                                                                                                                                                                                                                                                                                                                                                                                                                                                                                                                                                                                                                                                                                                                                                                                                                                                                                                                                                                                                                                                                                                                                                                                                                                                                                                                                                                                                                                                                                                                                                                                                                                                                                                                                                                                                                                                                                                                                                                                                                                                                                                                                                                                                                                                                                                                                                                                                                                                                                                                                                                                                                                                                                                                                                                                                                                                                                                                                                                                                                                                                                                                                                                                                                                                                                                                                                                                                                                                                                                                                                                                                                                                                                                                                                                                                                                                                                                                                                                                                                                                                                                                                                                                                                                                                                                                                                                                                                                                                                  | 117 | 112 |
| LR3                           |  | transmembrane receptor        | Activated | 3.548    | bias | 1.22E-07 | APOBEC3B, BCL2A1, BMP2, CASP3, Cc2, CCR7, CD40, CD86, FAS, ICAM1                                                                                                                                                                                                                                                                                                                                                                                                                                                                                                                                                                                                                                                                                                                                                                                                                                                                                                                                                                                                                                                                                                                                                                                                                                                                                                                                                                                                                                                                                                                                                                                                                                                                                                                                                                                                                                                                                                                                                                                                                                                                                                                                                                                                                                                                                                                                                                                                                                                                                                                                                                                                                                                                                                                                                                                                                                                                                                                                                                                                                                                                                                                                                                                                                                                                                                                                                                                                                                                                                                                                                                                                                                                                                                                                                                                                                                                                                                                                                                                                                                                                                                                                                                                                                                                                                                                                                                                                                                                                                                                                                                                                                                                                                                                                                                                                                                                                                                                                               | 179 | 177 |
| SHC1                          |  | other                         |           | 1.062    | bias | 1.25E-07 | ACOD1 ApolF6 (includes others) Cc2, CD4, CD86, GZMA, IL1B, IL4, IL8, GADD45B, Hamp/Hamp2                                                                                                                                                                                                                                                                                                                                                                                                                                                                                                                                                                                                                                                                                                                                                                                                                                                                                                                                                                                                                                                                                                                                                                                                                                                                                                                                                                                                                                                                                                                                                                                                                                                                                                                                                                                                                                                                                                                                                                                                                                                                                                                                                                                                                                                                                                                                                                                                                                                                                                                                                                                                                                                                                                                                                                                                                                                                                                                                                                                                                                                                                                                                                                                                                                                                                                                                                                                                                                                                                                                                                                                                                                                                                                                                                                                                                                                                                                                                                                                                                                                                                                                                                                                                                                                                                                                                                                                                                                                                                                                                                                                                                                                                                                                                                                                                                                                                                                                       | 167 | 177 |
| EGF                           |  | growth factor                 | Activated | 3.789    | bias | 1.44E-07 | BMF, CCR7, FTL1, GSTP1, ICAM1, NQO1, SDC4, SERPINE1, SOD2                                                                                                                                                                                                                                                                                                                                                                                                                                                                                                                                                                                                                                                                                                                                                                                                                                                                                                                                                                                                                                                                                                                                                                                                                                                                                                                                                                                                                                                                                                                                                                                                                                                                                                                                                                                                                                                                                                                                                                                                                                                                                                                                                                                                                                                                                                                                                                                                                                                                                                                                                                                                                                                                                                                                                                                                                                                                                                                                                                                                                                                                                                                                                                                                                                                                                                                                                                                                                                                                                                                                                                                                                                                                                                                                                                                                                                                                                                                                                                                                                                                                                                                                                                                                                                                                                                                                                                                                                                                                                                                                                                                                                                                                                                                                                                                                                                                                                                                                                      | 167 | 177 |
| SMAD4                         |  | transcription regulator       | Activated | 2.366    | bias | 1.56E-07 | ALCALM, APOA1, B4GALT1, CASP3, CD44, CD42CEP1, CEPBD, CTRB2, CXCL14, CXCR3                                                                                                                                                                                                                                                                                                                                                                                                                                                                                                                                                                                                                                                                                                                                                                                                                                                                                                                                                                                                                                                                                                                                                                                                                                                                                                                                                                                                                                                                                                                                                                                                                                                                                                                                                                                                                                                                                                                                                                                                                                                                                                                                                                                                                                                                                                                                                                                                                                                                                                                                                                                                                                                                                                                                                                                                                                                                                                                                                                                                                                                                                                                                                                                                                                                                                                                                                                                                                                                                                                                                                                                                                                                                                                                                                                                                                                                                                                                                                                                                                                                                                                                                                                                                                                                                                                                                                                                                                                                                                                                                                                                                                                                                                                                                                                                                                                                                                                                                     | 192 | 211 |
| AVD                           |  | chemical drug                 |           | 1.800    | bias | 1.59E-07 | APOA1, BMP2, BMP4, CAMK4, CSF1, DCLKA, GADD45B, ICAM1, ID1, IL1B                                                                                                                                                                                                                                                                                                                                                                                                                                                                                                                                                                                                                                                                                                                                                                                                                                                                                                                                                                                                                                                                                                                                                                                                                                                                                                                                                                                                                                                                                                                                                                                                                                                                                                                                                                                                                                                                                                                                                                                                                                                                                                                                                                                                                                                                                                                                                                                                                                                                                                                                                                                                                                                                                                                                                                                                                                                                                                                                                                                                                                                                                                                                                                                                                                                                                                                                                                                                                                                                                                                                                                                                                                                                                                                                                                                                                                                                                                                                                                                                                                                                                                                                                                                                                                                                                                                                                                                                                                                                                                                                                                                                                                                                                                                                                                                                                                                                                                                                               | 259 | 244 |
| ZYAD-FMK                      |  | chemical - protease inhibitor |           | 0.174    |      | 1.59E-07 | BMP2, CASP3, Cc2, CD14, CD40, ICAM1, IL1B, JUN, MRC1                                                                                                                                                                                                                                                                                                                                                                                                                                                                                                                                                                                                                                                                                                                                                                                                                                                                                                                                                                                                                                                                                                                                                                                                                                                                                                                                                                                                                                                                                                                                                                                                                                                                                                                                                                                                                                                                                                                                                                                                                                                                                                                                                                                                                                                                                                                                                                                                                                                                                                                                                                                                                                                                                                                                                                                                                                                                                                                                                                                                                                                                                                                                                                                                                                                                                                                                                                                                                                                                                                                                                                                                                                                                                                                                                                                                                                                                                                                                                                                                                                                                                                                                                                                                                                                                                                                                                                                                                                                                                                                                                                                                                                                                                                                                                                                                                                                                                                                                                           | 167 | 177 |
| SMAD5                         |  | growth factor                 | Activated | 3.140    | bias | 1.62E-07 | BLZ2A1, BIRC3, CAMK4, CASP3, CD40, GATA3, IL1B, IL6ST, MLKL                                                                                                                                                                                                                                                                                                                                                                                                                                                                                                                                                                                                                                                                                                                                                                                                                                                                                                                                                                                                                                                                                                                                                                                                                                                                                                                                                                                                                                                                                                                                                                                                                                                                                                                                                                                                                                                                                                                                                                                                                                                                                                                                                                                                                                                                                                                                                                                                                                                                                                                                                                                                                                                                                                                                                                                                                                                                                                                                                                                                                                                                                                                                                                                                                                                                                                                                                                                                                                                                                                                                                                                                                                                                                                                                                                                                                                                                                                                                                                                                                                                                                                                                                                                                                                                                                                                                                                                                                                                                                                                                                                                                                                                                                                                                                                                                                                                                                                                                                    | 154 | 177 |
| carbolipin                    |  | transcription regulator       | Activated | 2.010    | bias | 1.66E-07 | ANXA3, BMP6, CASP3, Cc2, CCR7, CD4, CD86, CP, CYBA, GAP43                                                                                                                                                                                                                                                                                                                                                                                                                                                                                                                                                                                                                                                                                                                                                                                                                                                                                                                                                                                                                                                                                                                                                                                                                                                                                                                                                                                                                                                                                                                                                                                                                                                                                                                                                                                                                                                                                                                                                                                                                                                                                                                                                                                                                                                                                                                                                                                                                                                                                                                                                                                                                                                                                                                                                                                                                                                                                                                                                                                                                                                                                                                                                                                                                                                                                                                                                                                                                                                                                                                                                                                                                                                                                                                                                                                                                                                                                                                                                                                                                                                                                                                                                                                                                                                                                                                                                                                                                                                                                                                                                                                                                                                                                                                                                                                                                                                                                                                                                      | 195 | 188 |
| IL21                          |  | chemical drug                 | Activated | 2.530    | bias | 1.68E-07 | BMP2, CSF1, Hamp/Hamp2, ICAM1, ID1, IL1B, RUNX2, SERPINE1                                                                                                                                                                                                                                                                                                                                                                                                                                                                                                                                                                                                                                                                                                                                                                                                                                                                                                                                                                                                                                                                                                                                                                                                                                                                                                                                                                                                                                                                                                                                                                                                                                                                                                                                                                                                                                                                                                                                                                                                                                                                                                                                                                                                                                                                                                                                                                                                                                                                                                                                                                                                                                                                                                                                                                                                                                                                                                                                                                                                                                                                                                                                                                                                                                                                                                                                                                                                                                                                                                                                                                                                                                                                                                                                                                                                                                                                                                                                                                                                                                                                                                                                                                                                                                                                                                                                                                                                                                                                                                                                                                                                                                                                                                                                                                                                                                                                                                                                                      | 167 | 177 |
| CD3                           |  | cytokine                      | Activated | 3.374    | bias | 1.78E-07 | CASP3, CD44, CD4, CP, LAMC2, MCM5, MRC1, SL, C3A42, TNFRSF12A, UPP1                                                                                                                                                                                                                                                                                                                                                                                                                                                                                                                                                                                                                                                                                                                                                                                                                                                                                                                                                                                                                                                                                                                                                                                                                                                                                                                                                                                                                                                                                                                                                                                                                                                                                                                                                                                                                                                                                                                                                                                                                                                                                                                                                                                                                                                                                                                                                                                                                                                                                                                                                                                                                                                                                                                                                                                                                                                                                                                                                                                                                                                                                                                                                                                                                                                                                                                                                                                                                                                                                                                                                                                                                                                                                                                                                                                                                                                                                                                                                                                                                                                                                                                                                                                                                                                                                                                                                                                                                                                                                                                                                                                                                                                                                                                                                                                                                                                                                                                                            |     |     |
| CD3                           |  | complex                       | Activated | 3.844    | bias | 1.93E-07 | ALAS1, ANG, BATF, BCL2A1, BIRC3, CIR, CASP3, Cc2, CD28, CD44                                                                                                                                                                                                                                                                                                                                                                                                                                                                                                                                                                                                                                                                                                                                                                                                                                                                                                                                                                                                                                                                                                                                                                                                                                                                                                                                                                                                                                                                                                                                                                                                                                                                                                                                                                                                                                                                                                                                                                                                                                                                                                                                                                                                                                                                                                                                                                                                                                                                                                                                                                                                                                                                                                                                                                                                                                                                                                                                                                                                                                                                                                                                                                                                                                                                                                                                                                                                                                                                                                                                                                                                                                                                                                                                                                                                                                                                                                                                                                                                                                                                                                                                                                                                                                                                                                                                                                                                                                                                                                                                                                                                                                                                                                                                                                                                                                                                                                                                                   | 168 | 168 |
| IL15                          |  | cytokine                      | Activated | 2.546    | bias | 1.93E-07 | CASP3, CD2, CD28, CD40, CD86, CD86, CD86, CD86, CSF1, CSF3                                                                                                                                                                                                                                                                                                                                                                                                                                                                                                                                                                                                                                                                                                                                                                                                                                                                                                                                                                                                                                                                                                                                                                                                                                                                                                                                                                                                                                                                                                                                                                                                                                                                                                                                                                                                                                                                                                                                                                                                                                                                                                                                                                                                                                                                                                                                                                                                                                                                                                                                                                                                                                                                                                                                                                                                                                                                                                                                                                                                                                                                                                                                                                                                                                                                                                                                                                                                                                                                                                                                                                                                                                                                                                                                                                                                                                                                                                                                                                                                                                                                                                                                                                                                                                                                                                                                                                                                                                                                                                                                                                                                                                                                                                                                                                                                                                                                                                                                                     | 166 | 167 |
| pinivic acid                  |  | chemical toxicant             |           | 3.249    | bias | 2.21E-07 | AKR1B10, ALAS1, APOA1, Cc2, CDNA, Cc2, CD24a, CF, CXCL12, CYP3A7, FABP5                                                                                                                                                                                                                                                                                                                                                                                                                                                                                                                                                                                                                                                                                                                                                                                                                                                                                                                                                                                                                                                                                                                                                                                                                                                                                                                                                                                                                                                                                                                                                                                                                                                                                                                                                                                                                                                                                                                                                                                                                                                                                                                                                                                                                                                                                                                                                                                                                                                                                                                                                                                                                                                                                                                                                                                                                                                                                                                                                                                                                                                                                                                                                                                                                                                                                                                                                                                                                                                                                                                                                                                                                                                                                                                                                                                                                                                                                                                                                                                                                                                                                                                                                                                                                                                                                                                                                                                                                                                                                                                                                                                                                                                                                                                                                                                                                                                                                                                                        | 218 | 217 |
| MYC                           |  | transcription regulator       |           | 1.102    | bias | 3.0E-07  | ACOD1, ALCAM, ANXA6, BCL2A1, BUB1, CASP3, CD44, CD86, CD |     |     |

|                    |       |                                |           |          |      |          |                                                                                  |          |
|--------------------|-------|--------------------------------|-----------|----------|------|----------|----------------------------------------------------------------------------------|----------|
| SOD1               |       | chemical toxicant              | Inhibited | -2.942   | bias | 6.54E-06 | BC12A1.BIRC3.C2.C2.FAS.ICAM1.IFNRG2.IB.LB.RACK1.SERPINE1                         | 140 (4)  |
| BMP2               | 3,424 | enzyme                         | Activated | 1.982    | bias | 6.56E-06 | BMP4.BUB1.CASP3.CD14.OP.FAS.FTH1.GSTP1.HSPB1.ICAM1                               | 191 (7)  |
| RARA               |       | ligand-dependent nuclear recep | Activated | 2.593    | bias | 6.74E-06 | BMP2.BMP4.BTG3.Ca1k1.CAMK4.CSF1.CXCL12.GADD45B.Hamp/Hamp.ID1                     | 185 (9)  |
| PRDM12             |       | transcription regulator        | Inhibited | 1.661    | bias | 6.78E-06 | APOA1.CNNA2.CD14.CD44.CD9.CEBPA.CLMN.CCBP.CP.CSF3                                | 230 (22) |
| 12-O-phytolanediol |       | chemical drug                  | Activated | 2.263    | bias | 6.78E-06 | BC12A1.C2.C2.CD44.CD68.CRISPLD2.CSF3.DUSP16.FOSL1.FTH1                           | 232 (18) |
| PP2A               |       | chemical - kinase inhibitor    | Inhibited | -2.963   | bias | 7.24E-06 | AKR1B10.ALA31.CXCL14.Glycam1.GSTP1.HSPB1.HSP27.HL.A.IF1                          | 221 (9)  |
| MTPN               |       | transcription regulator        | Activated | 3.130    | bias | 7.48E-06 | BC12A1.CXCL16.ICAM1.ID1.IB.LB.JUP.KLK3.LYN.SERPINE1.SOD2                         | 232 (19) |
| oxazoline          |       | chemical reagent               | Activated | 1.289    | bias | 7.52E-06 | BC12A1.CASP3.C2.C2.CNNA2.CEBPA.CP.FAS.HSPD.JUN.SERPINE1                          | 102 (10) |
| CD44               | 0.486 | other                          | Activated | 2.897    | bias | 7.62E-06 | C2.C2.Glycam1.ICAM1.IB.LB.SDC1.SDC4                                              | 94 (7)   |
| CD44               | 5.084 | growth factor                  | Activated | 2.897    | bias | 7.62E-06 | BIRC3.C2.C2.CD44.CD68.CXCR3.FAS.IB.LB.IRAXA.JUN                                  | 171 (18) |
| TRPC               |       | transporter                    | Activated | 2.817    | bias | 7.62E-06 | BMP2.BMP4.Ca1k1.CD44.CD68.CSF3.DEPPI1.GAT3A.Hamp/Hamp.ID1                        | 171 (18) |
| infixinab          |       | biologic drug                  | Inhibited | -3.000   | bias | 6.84E-06 | CASP3.CNNA2.FTH1.FTH1.HK2.JUN.LYN.V75.SLC11A2.STC2.TNFRSF12A                     | 43 (3)   |
| Vegf               |       | group                          | Activated | 4.094    | bias | 8.51E-06 | ADAM19.BATF.BMP2.C2.C2.IB.LB.LAG3.MYO1B.NFKB1A.TG33                              | 124 (11) |
| CD44               |       | chemical reagent               | Activated | 2.847    | bias | 8.74E-06 | BC12A1.BMP2.BUB1.CASP3.C2.C2.CD44.CD44.CXCL12.FAS.FOSL1                          | 160 (17) |
| PRKCA              |       | kinase                         | Inhibited | -2.887   | bias | 9.01E-06 | BC11A.CNNA2.CD42.DHRG3.DOCK1.GAP43.GPRC3D1.KL.FA.MICAL2                          | 111 (8)  |
| celecoxib          |       | chemical drug                  | Activated | 0.595    | bias | 9.01E-06 | BMP4.HEG1.IJLST.IR17R.JAG1.LRP1.NOTCH2.PTK7.PTPRK.SEMA3E                         | 203 (23) |
| valproic acid      |       | chemical drug                  | Activated | 0.708    | bias | 9.01E-06 | BC11A.CSF3.GDF15.ICAM1.ID1.IB3.JUN.NFKBIA.NQO1.OASL                              | 197 (20) |
| PTGS2              |       | enzyme                         | Activated | 3.642    | bias | 9.43E-06 | AMP3.ANTRX.APOA1.BAGALN1.CASP3.CD44.CD44.CD68.CDCA7.CEBPA                        | 207 (20) |
| IKZF2              |       | transcription regulator        | Activated | 2.646    | bias | 9.43E-06 | CD44.CRM1.FAS.FOSL1.HLA.A.IF1.LYN.PRX2.IB.Sema3b3 (includes other).SRGAP3.ZBTB16 | 134 (8)  |
| ATP-gamma-S        |       | chemical reagent               | Activated | 9.62E-06 | bias | 9.62E-06 | ANG.BIRC3.C2.C2.CD44.CD68.CSF3.CXCL12.CXCL14.ICAM1                               | 175 (19) |
| Mat (family)       |       | group                          | Activated | 3.000    | bias | 9.67E-06 | BATF.CD2.CD28.GATA3.GZMA.ICAM1.LAG3                                              | 165 (17) |
| UAP                |       | enzyme                         | Activated | 0.156    | bias | 9.72E-06 | BAQALN1.CD40.DOCK10.FAS.ICAM1.KL.F6.LAG3.REL.B.SDC4.SERPINE1                     | 178 (21) |
| sirolimus          |       | chemical drug                  | Inhibited | -2.124   | bias | 9.84E-06 | ACD01.CASP3.CSF1.CSF3.SERPINE1.SOD2                                              | 16 (16)  |
| nifedipine         |       | chemical drug                  | Activated | 1.437    | bias | 9.92E-06 | BC12A1.BMP2.CASP3.CNNA2.C2.CD44.CD68.CD68.CEBPA.CSF1                             | 164 (18) |
| IGV                |       | complex                        | Activated | 0.822    | bias | 1.03E-05 | CASP3.CP.CP.FAS.GSTP1.HMGCS2.ID1.IB.LB.KRT19.NFKBIA                              | 219 (21) |
| calyculin          |       | transmembrane receptor         | Activated | 2.253    | bias | 1.03E-05 | C2.C2.CD40.CD68.CD9.CEBPD.CD44.CSF1.FABP5.HSPB1.IB1B                             | 139 (18) |
| VDR                |       | transcription regulator        | Activated | 1.291    | bias | 1.06E-05 | BMP2.C2.C2.CD68.CD41.CD44.CD68.CSF1.CXCL12.CXCL14.ICAM1                          | 139 (18) |
| BC13               |       | transcription regulator        | Activated | 0.105    | bias | 1.06E-05 | CAV2.CAVIN1.CD14.FAS.HK2.ICAM1.ID1.KRT19.KR18.NQO1                               | 199 (22) |
| IRF6               |       | transcription regulator        | Activated | 0.114    | bias | 1.08E-05 | ARHGEF3.C2.CD41.CD44.Clec2d (includes others).CSF1.GATA3.HK2.ICAM1.ID1           | 188 (20) |
| roflumoxacin       |       | chemical drug                  | Activated | 2.333    | bias | 1.08E-05 | BC12A1.CD68.GATA3.ICAM1.ID1.IB.LB.IJ36G.JUN                                      | 152 (14) |
| CYLD               |       | transcription regulator        | Activated | 0.031    | bias | 1.14E-05 | AP06B.C3B.CD14.CD68.CD8A.IB.LB.KL.FA.MRC1.SOD2                                   | 141 (16) |
| ADORA2B            |       | G-protein coupled receptor     | Activated | -0.114   | bias | 1.14E-05 | BIRC3.CEBPA.HL.AA.ICAM1.NFKBIA.SERPINE1.SLC11A2.SOD2.TNFAIP3                     | 117 (14) |
| FGF1               |       | growth factor                  | Activated | 0.996    | bias | 1.16E-05 | CD40.CD68.IB.LB.KL.FA.MRC1.RUNX2.SERPINE1                                        | 219 (21) |
| phenolic acid      |       | chemical - endogenous mammal   | Activated | 0.092    | bias | 1.16E-05 | AKR1B10.C2.C2.CD68.GSTP1.ICAM1.IB.LB.JUN.NQO1.RHO.SERPINE1                       | 167 (17) |
| HDC1               |       | transcription regulator        | Activated | -1.141   | bias | 1.17E-05 | BC12A1.CD40.CD68.CD68.FAS.FOSL1.IB.JUN.NFKB1A.MRC1                               | 175 (18) |
| androgen           |       | chemical drug                  | Activated | -1.671   | bias | 1.22E-05 | AMP3.APOA1.BMF.CNNA2.CD44.CEBPA.FAS.GSTP1.ID1.KLK3                               | 215 (21) |
| SP3                |       | transcription regulator        | Activated | 2.195    | bias | 1.23E-05 | BMP4.BMP6.CD44.CT52.FOSL1.JUN.KLK3.NFKBIA.PTPA42.PTPRK                           | 190 (20) |
| JAK1               |       | kinase                         | Activated | 2.937    | bias | 1.23E-05 | BMF.CD2.CD40.CEBPA.DMD.FAS.FOSL1.GDF15.JUN.KL.FA                                 | 216 (20) |

|                              |       |                                   |           |        |      |          |                                                                                                                                                                                                                                                                                                                                                                                                                                                                                                                                                                                                                                                                                                                                                                                                                                                                                                                                                                                                                                                                                                                                                                                                                                                                                                                                                                                                                                                                                                                                                                                                                                                                                                                                                                                                                                                                                                                                                                                                                                                                                                                                                                                                                                                                                                                                                                                                                                                                                                                                                                                                                                                                                                                                                                                                                                                                                                                                                                                                                                                                                                                                                                                                                                                                                                                                                                                                                                                                                                                                                                                                                                                                                                                                                                                                                                                                                                                                                                                                                                                                                                                                                                                                                                                                                                                                                                                                                                                                                                                           |  |          |
|------------------------------|-------|-----------------------------------|-----------|--------|------|----------|---------------------------------------------------------------------------------------------------------------------------------------------------------------------------------------------------------------------------------------------------------------------------------------------------------------------------------------------------------------------------------------------------------------------------------------------------------------------------------------------------------------------------------------------------------------------------------------------------------------------------------------------------------------------------------------------------------------------------------------------------------------------------------------------------------------------------------------------------------------------------------------------------------------------------------------------------------------------------------------------------------------------------------------------------------------------------------------------------------------------------------------------------------------------------------------------------------------------------------------------------------------------------------------------------------------------------------------------------------------------------------------------------------------------------------------------------------------------------------------------------------------------------------------------------------------------------------------------------------------------------------------------------------------------------------------------------------------------------------------------------------------------------------------------------------------------------------------------------------------------------------------------------------------------------------------------------------------------------------------------------------------------------------------------------------------------------------------------------------------------------------------------------------------------------------------------------------------------------------------------------------------------------------------------------------------------------------------------------------------------------------------------------------------------------------------------------------------------------------------------------------------------------------------------------------------------------------------------------------------------------------------------------------------------------------------------------------------------------------------------------------------------------------------------------------------------------------------------------------------------------------------------------------------------------------------------------------------------------------------------------------------------------------------------------------------------------------------------------------------------------------------------------------------------------------------------------------------------------------------------------------------------------------------------------------------------------------------------------------------------------------------------------------------------------------------------------------------------------------------------------------------------------------------------------------------------------------------------------------------------------------------------------------------------------------------------------------------------------------------------------------------------------------------------------------------------------------------------------------------------------------------------------------------------------------------------------------------------------------------------------------------------------------------------------------------------------------------------------------------------------------------------------------------------------------------------------------------------------------------------------------------------------------------------------------------------------------------------------------------------------------------------------------------------------------------------------------------------------------------------------------------------------|--|----------|
| ibutylin                     |       | chemical drug                     | Activated | 2.157  | bias | 5.75E-05 | BCL2L1, BIRC3, CASP3, ID3, IL1B, SLCO3A1, SOD2, TNFAIP3                                                                                                                                                                                                                                                                                                                                                                                                                                                                                                                                                                                                                                                                                                                                                                                                                                                                                                                                                                                                                                                                                                                                                                                                                                                                                                                                                                                                                                                                                                                                                                                                                                                                                                                                                                                                                                                                                                                                                                                                                                                                                                                                                                                                                                                                                                                                                                                                                                                                                                                                                                                                                                                                                                                                                                                                                                                                                                                                                                                                                                                                                                                                                                                                                                                                                                                                                                                                                                                                                                                                                                                                                                                                                                                                                                                                                                                                                                                                                                                                                                                                                                                                                                                                                                                                                                                                                                                                                                                                   |  |          |
| CpG ODN 2395                 |       | chemical reagent                  | Activated | 2.236  | bias | 5.79E-05 | Cd2, CD4, CD46, CD86, IL1B                                                                                                                                                                                                                                                                                                                                                                                                                                                                                                                                                                                                                                                                                                                                                                                                                                                                                                                                                                                                                                                                                                                                                                                                                                                                                                                                                                                                                                                                                                                                                                                                                                                                                                                                                                                                                                                                                                                                                                                                                                                                                                                                                                                                                                                                                                                                                                                                                                                                                                                                                                                                                                                                                                                                                                                                                                                                                                                                                                                                                                                                                                                                                                                                                                                                                                                                                                                                                                                                                                                                                                                                                                                                                                                                                                                                                                                                                                                                                                                                                                                                                                                                                                                                                                                                                                                                                                                                                                                                                                |  | 141 (15) |
| CYP2J2                       |       | enzyme                            |           | -0.785 |      | 5.79E-05 | Cd2, CD44, ICAM1, IL1B, NFKBIA                                                                                                                                                                                                                                                                                                                                                                                                                                                                                                                                                                                                                                                                                                                                                                                                                                                                                                                                                                                                                                                                                                                                                                                                                                                                                                                                                                                                                                                                                                                                                                                                                                                                                                                                                                                                                                                                                                                                                                                                                                                                                                                                                                                                                                                                                                                                                                                                                                                                                                                                                                                                                                                                                                                                                                                                                                                                                                                                                                                                                                                                                                                                                                                                                                                                                                                                                                                                                                                                                                                                                                                                                                                                                                                                                                                                                                                                                                                                                                                                                                                                                                                                                                                                                                                                                                                                                                                                                                                                                            |  | 127 (10) |
| lutealstrant                 |       | chemical drug                     |           | -0.233 |      | 5.84E-05 | AP0A1, BMP2, BMP4, CAV2, Cc2, Cc2A, CSF1, CXCL12, GJB2, GSTP1                                                                                                                                                                                                                                                                                                                                                                                                                                                                                                                                                                                                                                                                                                                                                                                                                                                                                                                                                                                                                                                                                                                                                                                                                                                                                                                                                                                                                                                                                                                                                                                                                                                                                                                                                                                                                                                                                                                                                                                                                                                                                                                                                                                                                                                                                                                                                                                                                                                                                                                                                                                                                                                                                                                                                                                                                                                                                                                                                                                                                                                                                                                                                                                                                                                                                                                                                                                                                                                                                                                                                                                                                                                                                                                                                                                                                                                                                                                                                                                                                                                                                                                                                                                                                                                                                                                                                                                                                                                             |  | 210 (20) |
| lutealstrant                 |       | chemical drug                     |           | 0.083  |      | 5.84E-05 | ANKK1, BLNK, BMP2, BMP4, CSF1, CXCL12, JUN, KLF6, LITAF, MYO1B                                                                                                                                                                                                                                                                                                                                                                                                                                                                                                                                                                                                                                                                                                                                                                                                                                                                                                                                                                                                                                                                                                                                                                                                                                                                                                                                                                                                                                                                                                                                                                                                                                                                                                                                                                                                                                                                                                                                                                                                                                                                                                                                                                                                                                                                                                                                                                                                                                                                                                                                                                                                                                                                                                                                                                                                                                                                                                                                                                                                                                                                                                                                                                                                                                                                                                                                                                                                                                                                                                                                                                                                                                                                                                                                                                                                                                                                                                                                                                                                                                                                                                                                                                                                                                                                                                                                                                                                                                                            |  | 221 (22) |
| PPARD                        |       | ligand-dependent nuclear receptor |           | 0.022  | bias | 6.26E-05 | ALDH2, APOA1, Cc2, CD68, FBP1, HMGCS2, ICAM1, IL1B, LPN2, RASGRP1                                                                                                                                                                                                                                                                                                                                                                                                                                                                                                                                                                                                                                                                                                                                                                                                                                                                                                                                                                                                                                                                                                                                                                                                                                                                                                                                                                                                                                                                                                                                                                                                                                                                                                                                                                                                                                                                                                                                                                                                                                                                                                                                                                                                                                                                                                                                                                                                                                                                                                                                                                                                                                                                                                                                                                                                                                                                                                                                                                                                                                                                                                                                                                                                                                                                                                                                                                                                                                                                                                                                                                                                                                                                                                                                                                                                                                                                                                                                                                                                                                                                                                                                                                                                                                                                                                                                                                                                                                                         |  | 197 (18) |
| NOX4                         |       | enzyme                            | Activated | 2.425  | bias | 6.31E-05 | BMF, Cc2, CD4, ICAM1, Saa3, SERPINE1                                                                                                                                                                                                                                                                                                                                                                                                                                                                                                                                                                                                                                                                                                                                                                                                                                                                                                                                                                                                                                                                                                                                                                                                                                                                                                                                                                                                                                                                                                                                                                                                                                                                                                                                                                                                                                                                                                                                                                                                                                                                                                                                                                                                                                                                                                                                                                                                                                                                                                                                                                                                                                                                                                                                                                                                                                                                                                                                                                                                                                                                                                                                                                                                                                                                                                                                                                                                                                                                                                                                                                                                                                                                                                                                                                                                                                                                                                                                                                                                                                                                                                                                                                                                                                                                                                                                                                                                                                                                                      |  | 183 (18) |
| PAF1                         |       | other                             | Activated | 2.646  | bias | 6.35E-05 | BIRC3, KLF4, NFKB1Z, OASL, SDC4, SERPINE1, SOD2                                                                                                                                                                                                                                                                                                                                                                                                                                                                                                                                                                                                                                                                                                                                                                                                                                                                                                                                                                                                                                                                                                                                                                                                                                                                                                                                                                                                                                                                                                                                                                                                                                                                                                                                                                                                                                                                                                                                                                                                                                                                                                                                                                                                                                                                                                                                                                                                                                                                                                                                                                                                                                                                                                                                                                                                                                                                                                                                                                                                                                                                                                                                                                                                                                                                                                                                                                                                                                                                                                                                                                                                                                                                                                                                                                                                                                                                                                                                                                                                                                                                                                                                                                                                                                                                                                                                                                                                                                                                           |  |          |
| MAPK7                        |       | kinase                            | Activated | 2.580  | bias | 6.35E-05 | BCL2L1, ID1, IL1B, JUN, KLF4, NQO1, STEAP4                                                                                                                                                                                                                                                                                                                                                                                                                                                                                                                                                                                                                                                                                                                                                                                                                                                                                                                                                                                                                                                                                                                                                                                                                                                                                                                                                                                                                                                                                                                                                                                                                                                                                                                                                                                                                                                                                                                                                                                                                                                                                                                                                                                                                                                                                                                                                                                                                                                                                                                                                                                                                                                                                                                                                                                                                                                                                                                                                                                                                                                                                                                                                                                                                                                                                                                                                                                                                                                                                                                                                                                                                                                                                                                                                                                                                                                                                                                                                                                                                                                                                                                                                                                                                                                                                                                                                                                                                                                                                |  | 212 (23) |
| Mapk3/7                      |       | kinase                            |           | 1.616  |      | 6.42E-05 | BMF4, CASP3, Cc2, IL1B, JUN, NFKB1Z, NOX2, Vmn3                                                                                                                                                                                                                                                                                                                                                                                                                                                                                                                                                                                                                                                                                                                                                                                                                                                                                                                                                                                                                                                                                                                                                                                                                                                                                                                                                                                                                                                                                                                                                                                                                                                                                                                                                                                                                                                                                                                                                                                                                                                                                                                                                                                                                                                                                                                                                                                                                                                                                                                                                                                                                                                                                                                                                                                                                                                                                                                                                                                                                                                                                                                                                                                                                                                                                                                                                                                                                                                                                                                                                                                                                                                                                                                                                                                                                                                                                                                                                                                                                                                                                                                                                                                                                                                                                                                                                                                                                                                                           |  | 181 (17) |
| SMARCB1                      |       | transcription regulator           |           | 1.933  | bias | 6.46E-05 | Cc2A, CD4, CSF1, CYP3A7, DCKA, F11R, FAS, FBP1, GJB2, IFI16                                                                                                                                                                                                                                                                                                                                                                                                                                                                                                                                                                                                                                                                                                                                                                                                                                                                                                                                                                                                                                                                                                                                                                                                                                                                                                                                                                                                                                                                                                                                                                                                                                                                                                                                                                                                                                                                                                                                                                                                                                                                                                                                                                                                                                                                                                                                                                                                                                                                                                                                                                                                                                                                                                                                                                                                                                                                                                                                                                                                                                                                                                                                                                                                                                                                                                                                                                                                                                                                                                                                                                                                                                                                                                                                                                                                                                                                                                                                                                                                                                                                                                                                                                                                                                                                                                                                                                                                                                                               |  | 193 (11) |
| mycophenolic acid            |       | chemical drug                     | Activated | 2.121  | bias | 6.67E-05 | BIRC3, ID3, IL1B, KRT19, RUNX2, SERPINE1, SLCO3A1, SOD2, TNFAIP3                                                                                                                                                                                                                                                                                                                                                                                                                                                                                                                                                                                                                                                                                                                                                                                                                                                                                                                                                                                                                                                                                                                                                                                                                                                                                                                                                                                                                                                                                                                                                                                                                                                                                                                                                                                                                                                                                                                                                                                                                                                                                                                                                                                                                                                                                                                                                                                                                                                                                                                                                                                                                                                                                                                                                                                                                                                                                                                                                                                                                                                                                                                                                                                                                                                                                                                                                                                                                                                                                                                                                                                                                                                                                                                                                                                                                                                                                                                                                                                                                                                                                                                                                                                                                                                                                                                                                                                                                                                          |  | 142 (14) |
| gossypolacetic acid          |       | chemical drug                     |           | -0.277 | bias | 6.85E-05 | BCL2L1, Cc2, CD4, CD44, CD83, CD86, CSF1, FAS, IL1B, MRC1                                                                                                                                                                                                                                                                                                                                                                                                                                                                                                                                                                                                                                                                                                                                                                                                                                                                                                                                                                                                                                                                                                                                                                                                                                                                                                                                                                                                                                                                                                                                                                                                                                                                                                                                                                                                                                                                                                                                                                                                                                                                                                                                                                                                                                                                                                                                                                                                                                                                                                                                                                                                                                                                                                                                                                                                                                                                                                                                                                                                                                                                                                                                                                                                                                                                                                                                                                                                                                                                                                                                                                                                                                                                                                                                                                                                                                                                                                                                                                                                                                                                                                                                                                                                                                                                                                                                                                                                                                                                 |  | 143 (15) |
| IFP2                         |       | transcription regulator           | Activated | 2.267  | bias | 6.91E-05 | ANK, CD44, HK2, ID1, Iffat7, IL1B, IL18, KLF4, MAPK6, PSM810                                                                                                                                                                                                                                                                                                                                                                                                                                                                                                                                                                                                                                                                                                                                                                                                                                                                                                                                                                                                                                                                                                                                                                                                                                                                                                                                                                                                                                                                                                                                                                                                                                                                                                                                                                                                                                                                                                                                                                                                                                                                                                                                                                                                                                                                                                                                                                                                                                                                                                                                                                                                                                                                                                                                                                                                                                                                                                                                                                                                                                                                                                                                                                                                                                                                                                                                                                                                                                                                                                                                                                                                                                                                                                                                                                                                                                                                                                                                                                                                                                                                                                                                                                                                                                                                                                                                                                                                                                                              |  | 156 (18) |
| TCF7L2                       |       | transcription regulator           | Activated | 2.299  | bias | 7.16E-05 | ANG, ARX, FBAP5, FBP1, Hsp81a, Iffat2, OASL, RASEL, SDC1                                                                                                                                                                                                                                                                                                                                                                                                                                                                                                                                                                                                                                                                                                                                                                                                                                                                                                                                                                                                                                                                                                                                                                                                                                                                                                                                                                                                                                                                                                                                                                                                                                                                                                                                                                                                                                                                                                                                                                                                                                                                                                                                                                                                                                                                                                                                                                                                                                                                                                                                                                                                                                                                                                                                                                                                                                                                                                                                                                                                                                                                                                                                                                                                                                                                                                                                                                                                                                                                                                                                                                                                                                                                                                                                                                                                                                                                                                                                                                                                                                                                                                                                                                                                                                                                                                                                                                                                                                                                  |  | 181 (17) |
| NR1H3                        |       | ligand-dependent nuclear receptor |           | 1.239  | bias | 7.17E-05 | BMP4, CSRP1, CYP3A7, DCK10, FBP1, FTH1, GAB1, HMGCS2, ID1, ID3                                                                                                                                                                                                                                                                                                                                                                                                                                                                                                                                                                                                                                                                                                                                                                                                                                                                                                                                                                                                                                                                                                                                                                                                                                                                                                                                                                                                                                                                                                                                                                                                                                                                                                                                                                                                                                                                                                                                                                                                                                                                                                                                                                                                                                                                                                                                                                                                                                                                                                                                                                                                                                                                                                                                                                                                                                                                                                                                                                                                                                                                                                                                                                                                                                                                                                                                                                                                                                                                                                                                                                                                                                                                                                                                                                                                                                                                                                                                                                                                                                                                                                                                                                                                                                                                                                                                                                                                                                                            |  | 138 (7)  |
| LYN                          | 0.712 | kinase                            |           | 1.177  | bias | 7.29E-05 | AP0A1, Cc2, CD8, Cc2A, CCR7, CD40, CSF3, CXCL16, IL6, FBP1, GSTP1                                                                                                                                                                                                                                                                                                                                                                                                                                                                                                                                                                                                                                                                                                                                                                                                                                                                                                                                                                                                                                                                                                                                                                                                                                                                                                                                                                                                                                                                                                                                                                                                                                                                                                                                                                                                                                                                                                                                                                                                                                                                                                                                                                                                                                                                                                                                                                                                                                                                                                                                                                                                                                                                                                                                                                                                                                                                                                                                                                                                                                                                                                                                                                                                                                                                                                                                                                                                                                                                                                                                                                                                                                                                                                                                                                                                                                                                                                                                                                                                                                                                                                                                                                                                                                                                                                                                                                                                                                                         |  | 193 (15) |
| LYN                          |       | kinase                            |           | 1.177  | bias | 7.31E-05 | Cc2, CD2, Cc2A, CD40, CD86, CSF1, IL1B, NFKBIA, NFKB1Z                                                                                                                                                                                                                                                                                                                                                                                                                                                                                                                                                                                                                                                                                                                                                                                                                                                                                                                                                                                                                                                                                                                                                                                                                                                                                                                                                                                                                                                                                                                                                                                                                                                                                                                                                                                                                                                                                                                                                                                                                                                                                                                                                                                                                                                                                                                                                                                                                                                                                                                                                                                                                                                                                                                                                                                                                                                                                                                                                                                                                                                                                                                                                                                                                                                                                                                                                                                                                                                                                                                                                                                                                                                                                                                                                                                                                                                                                                                                                                                                                                                                                                                                                                                                                                                                                                                                                                                                                                                                    |  | 178 (10) |
| lactadherin (SR)-sulfoximine |       | chemical - protease inhibitor     |           | 0.320  | bias | 7.45E-05 | CASP3, NFKBIA, NQO1, SERPINE1, TNFAIP3                                                                                                                                                                                                                                                                                                                                                                                                                                                                                                                                                                                                                                                                                                                                                                                                                                                                                                                                                                                                                                                                                                                                                                                                                                                                                                                                                                                                                                                                                                                                                                                                                                                                                                                                                                                                                                                                                                                                                                                                                                                                                                                                                                                                                                                                                                                                                                                                                                                                                                                                                                                                                                                                                                                                                                                                                                                                                                                                                                                                                                                                                                                                                                                                                                                                                                                                                                                                                                                                                                                                                                                                                                                                                                                                                                                                                                                                                                                                                                                                                                                                                                                                                                                                                                                                                                                                                                                                                                                                                    |  | 143 (15) |
| KLRI1                        |       | other                             |           | 0.000  | bias | 7.90E-05 | Cc2, CD9, FAS, FBP1, FOSL1, FTL, GATA3, GSTP1, HLA-A, HSPB1                                                                                                                                                                                                                                                                                                                                                                                                                                                                                                                                                                                                                                                                                                                                                                                                                                                                                                                                                                                                                                                                                                                                                                                                                                                                                                                                                                                                                                                                                                                                                                                                                                                                                                                                                                                                                                                                                                                                                                                                                                                                                                                                                                                                                                                                                                                                                                                                                                                                                                                                                                                                                                                                                                                                                                                                                                                                                                                                                                                                                                                                                                                                                                                                                                                                                                                                                                                                                                                                                                                                                                                                                                                                                                                                                                                                                                                                                                                                                                                                                                                                                                                                                                                                                                                                                                                                                                                                                                                               |  | 188 (20) |
| PIK3CA                       |       | kinase                            |           | 1.941  |      | 7.97E-05 | BMP2, JUN, KLF4, SOD2                                                                                                                                                                                                                                                                                                                                                                                                                                                                                                                                                                                                                                                                                                                                                                                                                                                                                                                                                                                                                                                                                                                                                                                                                                                                                                                                                                                                                                                                                                                                                                                                                                                                                                                                                                                                                                                                                                                                                                                                                                                                                                                                                                                                                                                                                                                                                                                                                                                                                                                                                                                                                                                                                                                                                                                                                                                                                                                                                                                                                                                                                                                                                                                                                                                                                                                                                                                                                                                                                                                                                                                                                                                                                                                                                                                                                                                                                                                                                                                                                                                                                                                                                                                                                                                                                                                                                                                                                                                                                                     |  |          |
| PLAU                         |       | peptidase                         |           | 0.186  |      | 7.97E-05 | ALCAM, Cc2, CD4, Cc2A, CD44, Cc2A, Cc2B, JAG1, SERPINE1                                                                                                                                                                                                                                                                                                                                                                                                                                                                                                                                                                                                                                                                                                                                                                                                                                                                                                                                                                                                                                                                                                                                                                                                                                                                                                                                                                                                                                                                                                                                                                                                                                                                                                                                                                                                                                                                                                                                                                                                                                                                                                                                                                                                                                                                                                                                                                                                                                                                                                                                                                                                                                                                                                                                                                                                                                                                                                                                                                                                                                                                                                                                                                                                                                                                                                                                                                                                                                                                                                                                                                                                                                                                                                                                                                                                                                                                                                                                                                                                                                                                                                                                                                                                                                                                                                                                                                                                                                                                   |  | 211 (23) |
| CD2                          |       | cytokine                          |           | 1.412  |      | 7.97E-05 | ANG, Cc2, GDF15, ICAM1, IL1B, RELB, SERPINE1, SERPINE1                                                                                                                                                                                                                                                                                                                                                                                                                                                                                                                                                                                                                                                                                                                                                                                                                                                                                                                                                                                                                                                                                                                                                                                                                                                                                                                                                                                                                                                                                                                                                                                                                                                                                                                                                                                                                                                                                                                                                                                                                                                                                                                                                                                                                                                                                                                                                                                                                                                                                                                                                                                                                                                                                                                                                                                                                                                                                                                                                                                                                                                                                                                                                                                                                                                                                                                                                                                                                                                                                                                                                                                                                                                                                                                                                                                                                                                                                                                                                                                                                                                                                                                                                                                                                                                                                                                                                                                                                                                                    |  | 232 (24) |
| FADD                         |       | other                             |           | 0.333  | bias | 8.01E-05 | Cc2, CD40, CD86, CECPA, CECPD, ICAM1, IL1B, SERPINE1, ZC3H12A                                                                                                                                                                                                                                                                                                                                                                                                                                                                                                                                                                                                                                                                                                                                                                                                                                                                                                                                                                                                                                                                                                                                                                                                                                                                                                                                                                                                                                                                                                                                                                                                                                                                                                                                                                                                                                                                                                                                                                                                                                                                                                                                                                                                                                                                                                                                                                                                                                                                                                                                                                                                                                                                                                                                                                                                                                                                                                                                                                                                                                                                                                                                                                                                                                                                                                                                                                                                                                                                                                                                                                                                                                                                                                                                                                                                                                                                                                                                                                                                                                                                                                                                                                                                                                                                                                                                                                                                                                                             |  | 196 (19) |
| BRD2                         |       | kinase                            |           | 0.633  | bias | 8.01E-05 | BIRC3, Cc2, FAS, GADD45B, ICAM1, IRF5, JUN, KLF6, TNFAIP3                                                                                                                                                                                                                                                                                                                                                                                                                                                                                                                                                                                                                                                                                                                                                                                                                                                                                                                                                                                                                                                                                                                                                                                                                                                                                                                                                                                                                                                                                                                                                                                                                                                                                                                                                                                                                                                                                                                                                                                                                                                                                                                                                                                                                                                                                                                                                                                                                                                                                                                                                                                                                                                                                                                                                                                                                                                                                                                                                                                                                                                                                                                                                                                                                                                                                                                                                                                                                                                                                                                                                                                                                                                                                                                                                                                                                                                                                                                                                                                                                                                                                                                                                                                                                                                                                                                                                                                                                                                                 |  | 146 (18) |
| SREBF1                       |       | transcription regulator           | Activated | 2.466  | bias | 8.26E-05 | CBLCC, Cc2, IL1B, IL7R, LY9, NQO1, PRKD3                                                                                                                                                                                                                                                                                                                                                                                                                                                                                                                                                                                                                                                                                                                                                                                                                                                                                                                                                                                                                                                                                                                                                                                                                                                                                                                                                                                                                                                                                                                                                                                                                                                                                                                                                                                                                                                                                                                                                                                                                                                                                                                                                                                                                                                                                                                                                                                                                                                                                                                                                                                                                                                                                                                                                                                                                                                                                                                                                                                                                                                                                                                                                                                                                                                                                                                                                                                                                                                                                                                                                                                                                                                                                                                                                                                                                                                                                                                                                                                                                                                                                                                                                                                                                                                                                                                                                                                                                                                                                  |  | 186 (20) |
| TRIM56                       |       | peptidase                         |           | 0.585  | bias | 8.34E-05 | CAMK1D, CD14, CECPA, CECPD, CFI, CSRP1, DEPP1, FAPB5, FAS, HK2                                                                                                                                                                                                                                                                                                                                                                                                                                                                                                                                                                                                                                                                                                                                                                                                                                                                                                                                                                                                                                                                                                                                                                                                                                                                                                                                                                                                                                                                                                                                                                                                                                                                                                                                                                                                                                                                                                                                                                                                                                                                                                                                                                                                                                                                                                                                                                                                                                                                                                                                                                                                                                                                                                                                                                                                                                                                                                                                                                                                                                                                                                                                                                                                                                                                                                                                                                                                                                                                                                                                                                                                                                                                                                                                                                                                                                                                                                                                                                                                                                                                                                                                                                                                                                                                                                                                                                                                                                                            |  | 186 (20) |
| Wd17                         |       | other                             |           | 0.707  |      | 8.58E-05 | BMP5, Hamp/Hamp2, ID1                                                                                                                                                                                                                                                                                                                                                                                                                                                                                                                                                                                                                                                                                                                                                                                                                                                                                                                                                                                                                                                                                                                                                                                                                                                                                                                                                                                                                                                                                                                                                                                                                                                                                                                                                                                                                                                                                                                                                                                                                                                                                                                                                                                                                                                                                                                                                                                                                                                                                                                                                                                                                                                                                                                                                                                                                                                                                                                                                                                                                                                                                                                                                                                                                                                                                                                                                                                                                                                                                                                                                                                                                                                                                                                                                                                                                                                                                                                                                                                                                                                                                                                                                                                                                                                                                                                                                                                                                                                                                                     |  |          |
| IKBKE                        |       | kinase                            |           | 0.594  | bias | 8.76E-05 | Cc2, IL1B, MRC1                                                                                                                                                                                                                                                                                                                                                                                                                                                                                                                                                                                                                                                                                                                                                                                                                                                                                                                                                                                                                                                                                                                                                                                                                                                                                                                                                                                                                                                                                                                                                                                                                                                                                                                                                                                                                                                                                                                                                                                                                                                                                                                                                                                                                                                                                                                                                                                                                                                                                                                                                                                                                                                                                                                                                                                                                                                                                                                                                                                                                                                                                                                                                                                                                                                                                                                                                                                                                                                                                                                                                                                                                                                                                                                                                                                                                                                                                                                                                                                                                                                                                                                                                                                                                                                                                                                                                                                                                                                                                                           |  |          |
| RARG                         |       | ligand-dependent nuclear receptor |           | 1.620  |      | 8.76E-05 | ACOD1, BIRC3, Cc2, CSF3, CXCL12, HLA-A, IFI16, NFKBIA, SLCO2A3                                                                                                                                                                                                                                                                                                                                                                                                                                                                                                                                                                                                                                                                                                                                                                                                                                                                                                                                                                                                                                                                                                                                                                                                                                                                                                                                                                                                                                                                                                                                                                                                                                                                                                                                                                                                                                                                                                                                                                                                                                                                                                                                                                                                                                                                                                                                                                                                                                                                                                                                                                                                                                                                                                                                                                                                                                                                                                                                                                                                                                                                                                                                                                                                                                                                                                                                                                                                                                                                                                                                                                                                                                                                                                                                                                                                                                                                                                                                                                                                                                                                                                                                                                                                                                                                                                                                                                                                                                                            |  | 175 (15) |
| FASLG                        |       | cytokine                          |           | 0.293  |      | 8.82E-05 | AP0A1, BMP2, DHR53, GAP43, JUN, KLF4, KLF3, KRT20, ZNF703                                                                                                                                                                                                                                                                                                                                                                                                                                                                                                                                                                                                                                                                                                                                                                                                                                                                                                                                                                                                                                                                                                                                                                                                                                                                                                                                                                                                                                                                                                                                                                                                                                                                                                                                                                                                                                                                                                                                                                                                                                                                                                                                                                                                                                                                                                                                                                                                                                                                                                                                                                                                                                                                                                                                                                                                                                                                                                                                                                                                                                                                                                                                                                                                                                                                                                                                                                                                                                                                                                                                                                                                                                                                                                                                                                                                                                                                                                                                                                                                                                                                                                                                                                                                                                                                                                                                                                                                                                                                 |  | 160 (10) |
| PS1                          |       | cytokine                          | Activated | 2.411  | bias | 8.82E-05 | CASP3, CD44, FAS, FTH1, IL1B, RUNX2                                                                                                                                                                                                                                                                                                                                                                                                                                                                                                                                                                                                                                                                                                                                                                                                                                                                                                                                                                                                                                                                                                                                                                                                                                                                                                                                                                                                                                                                                                                                                                                                                                                                                                                                                                                                                                                                                                                                                                                                                                                                                                                                                                                                                                                                                                                                                                                                                                                                                                                                                                                                                                                                                                                                                                                                                                                                                                                                                                                                                                                                                                                                                                                                                                                                                                                                                                                                                                                                                                                                                                                                                                                                                                                                                                                                                                                                                                                                                                                                                                                                                                                                                                                                                                                                                                                                                                                                                                                                                       |  | 187 (18) |
| NGF                          |       | growth factor                     | Activated | 2.488  | bias | 8.90E-05 | Cc2, CD86, ICAM1, IL1B, KLF4, LY75                                                                                                                                                                                                                                                                                                                                                                                                                                                                                                                                                                                                                                                                                                                                                                                                                                                                                                                                                                                                                                                                                                                                                                                                                                                                                                                                                                                                                                                                                                                                                                                                                                                                                                                                                                                                                                                                                                                                                                                                                                                                                                                                                                                                                                                                                                                                                                                                                                                                                                                                                                                                                                                                                                                                                                                                                                                                                                                                                                                                                                                                                                                                                                                                                                                                                                                                                                                                                                                                                                                                                                                                                                                                                                                                                                                                                                                                                                                                                                                                                                                                                                                                                                                                                                                                                                                                                                                                                                                                                        |  | 137 (18) |
| inosine                      |       | chemical - endogenous mammal      | Activated | 2.646  | bias | 9.38E-05 | AKR1B10, CCR7, CD40, CD83, CD86, FAS, FOSL1, GAP43, ID1, JUN                                                                                                                                                                                                                                                                                                                                                                                                                                                                                                                                                                                                                                                                                                                                                                                                                                                                                                                                                                                                                                                                                                                                                                                                                                                                                                                                                                                                                                                                                                                                                                                                                                                                                                                                                                                                                                                                                                                                                                                                                                                                                                                                                                                                                                                                                                                                                                                                                                                                                                                                                                                                                                                                                                                                                                                                                                                                                                                                                                                                                                                                                                                                                                                                                                                                                                                                                                                                                                                                                                                                                                                                                                                                                                                                                                                                                                                                                                                                                                                                                                                                                                                                                                                                                                                                                                                                                                                                                                                              |  | 149 (18) |
| caragogenan                  |       | chemical drug                     | Activated | 2.592  | bias | 9.38E-05 | ALCAM, ANTXR2, CD68, FTL, GAP43, SERPINE1, SERPINE1                                                                                                                                                                                                                                                                                                                                                                                                                                                                                                                                                                                                                                                                                                                                                                                                                                                                                                                                                                                                                                                                                                                                                                                                                                                                                                                                                                                                                                                                                                                                                                                                                                                                                                                                                                                                                                                                                                                                                                                                                                                                                                                                                                                                                                                                                                                                                                                                                                                                                                                                                                                                                                                                                                                                                                                                                                                                                                                                                                                                                                                                                                                                                                                                                                                                                                                                                                                                                                                                                                                                                                                                                                                                                                                                                                                                                                                                                                                                                                                                                                                                                                                                                                                                                                                                                                                                                                                                                                                                       |  |          |
| caragogenan                  |       | chemical drug                     | Activated | 2.592  | bias | 9.38E-05 | Cc2, FOSL1, GRM8, ICAM1, IL1B, JUN, NFKBIA                                                                                                                                                                                                                                                                                                                                                                                                                                                                                                                                                                                                                                                                                                                                                                                                                                                                                                                                                                                                                                                                                                                                                                                                                                                                                                                                                                                                                                                                                                                                                                                                                                                                                                                                                                                                                                                                                                                                                                                                                                                                                                                                                                                                                                                                                                                                                                                                                                                                                                                                                                                                                                                                                                                                                                                                                                                                                                                                                                                                                                                                                                                                                                                                                                                                                                                                                                                                                                                                                                                                                                                                                                                                                                                                                                                                                                                                                                                                                                                                                                                                                                                                                                                                                                                                                                                                                                                                                                                                                |  | 205 (18) |
| caragogenan                  |       | chemical drug                     | Inhibited | -2.415 | bias | 9.57E-05 | Cc2, FOSL1, ICAM1, IL1B, JUN, NFKBIA, NFKB1Z, NFKB1Z                                                                                                                                                                                                                                                                                                                                                                                                                                                                                                                                                                                                                                                                                                                                                                                                                                                                                                                                                                                                                                                                                                                                                                                                                                                                                                                                                                                                                                                                                                                                                                                                                                                                                                                                                                                                                                                                                                                                                                                                                                                                                                                                                                                                                                                                                                                                                                                                                                                                                                                                                                                                                                                                                                                                                                                                                                                                                                                                                                                                                                                                                                                                                                                                                                                                                                                                                                                                                                                                                                                                                                                                                                                                                                                                                                                                                                                                                                                                                                                                                                                                                                                                                                                                                                                                                                                                                                                                                                                                      |  | 161 (17) |
| lactadherin/hydroquinone     |       | chemical reagent                  | Activated | 2.740  | bias | 9.57E-05 | FOSL1, FTH1, FTL, GSTA3, GSTP1, JUN, NQO1, SERPINE1, UGT1A7 (includes others)                                                                                                                                                                                                                                                                                                                                                                                                                                                                                                                                                                                                                                                                                                                                                                                                                                                                                                                                                                                                                                                                                                                                                                                                                                                                                                                                                                                                                                                                                                                                                                                                                                                                                                                                                                                                                                                                                                                                                                                                                                                                                                                                                                                                                                                                                                                                                                                                                                                                                                                                                                                                                                                                                                                                                                                                                                                                                                                                                                                                                                                                                                                                                                                                                                                                                                                                                                                                                                                                                                                                                                                                                                                                                                                                                                                                                                                                                                                                                                                                                                                                                                                                                                                                                                                                                                                                                                                                                                             |  | 186 (19) |
| 17-alpha-ethinylestradiol    |       | chemical drug                     |           | 1.863  | bias | 9.75E-05 | Cc2, CCR7, CD86, CXCR3, GDF15, IFI16, JUN, KRT19, MRC1, PERP                                                                                                                                                                                                                                                                                                                                                                                                                                                                                                                                                                                                                                                                                                                                                                                                                                                                                                                                                                                                                                                                                                                                                                                                                                                                                                                                                                                                                                                                                                                                                                                                                                                                                                                                                                                                                                                                                                                                                                                                                                                                                                                                                                                                                                                                                                                                                                                                                                                                                                                                                                                                                                                                                                                                                                                                                                                                                                                                                                                                                                                                                                                                                                                                                                                                                                                                                                                                                                                                                                                                                                                                                                                                                                                                                                                                                                                                                                                                                                                                                                                                                                                                                                                                                                                                                                                                                                                                                                                              |  | 247 (20) |
| SYK                          |       | kinase                            |           | -0.256 |      | 9.80E-05 | BIRC3, CCR7, CD44, DOKK10, FOSL1, GATA3, ICAM1, IL1B, LY9, RASSF4                                                                                                                                                                                                                                                                                                                                                                                                                                                                                                                                                                                                                                                                                                                                                                                                                                                                                                                                                                                                                                                                                                                                                                                                                                                                                                                                                                                                                                                                                                                                                                                                                                                                                                                                                                                                                                                                                                                                                                                                                                                                                                                                                                                                                                                                                                                                                                                                                                                                                                                                                                                                                                                                                                                                                                                                                                                                                                                                                                                                                                                                                                                                                                                                                                                                                                                                                                                                                                                                                                                                                                                                                                                                                                                                                                                                                                                                                                                                                                                                                                                                                                                                                                                                                                                                                                                                                                                                                                                         |  | 192 (22) |
| vanmammann                   |       | chemical - kinase inhibitor       | Inhibited | -2.689 | bias | 1.02E-04 | CASP3, Cc2, CD4, CD44, CECPD, CSFP1, CXCL16, GAP43, GSTP1, ICAM1                                                                                                                                                                                                                                                                                                                                                                                                                                                                                                                                                                                                                                                                                                                                                                                                                                                                                                                                                                                                                                                                                                                                                                                                                                                                                                                                                                                                                                                                                                                                                                                                                                                                                                                                                                                                                                                                                                                                                                                                                                                                                                                                                                                                                                                                                                                                                                                                                                                                                                                                                                                                                                                                                                                                                                                                                                                                                                                                                                                                                                                                                                                                                                                                                                                                                                                                                                                                                                                                                                                                                                                                                                                                                                                                                                                                                                                                                                                                                                                                                                                                                                                                                                                                                                                                                                                                                                                                                                                          |  | 206 (20) |
| SA                           |       | group                             | Activated | 2.403  | bias | 1.03E-04 | Cc2, CSF1, CSF3, ICAM1, IL1B, MRC1                                                                                                                                                                                                                                                                                                                                                                                                                                                                                                                                                                                                                                                                                                                                                                                                                                                                                                                                                                                                                                                                                                                                                                                                                                                                                                                                                                                                                                                                                                                                                                                                                                                                                                                                                                                                                                                                                                                                                                                                                                                                                                                                                                                                                                                                                                                                                                                                                                                                                                                                                                                                                                                                                                                                                                                                                                                                                                                                                                                                                                                                                                                                                                                                                                                                                                                                                                                                                                                                                                                                                                                                                                                                                                                                                                                                                                                                                                                                                                                                                                                                                                                                                                                                                                                                                                                                                                                                                                                                                        |  | 158 (18) |
| NORAD                        |       | other                             | Activated | 2.449  | bias | 1.03E-04 | BASP1, GADD45B, ID3, JUN, SDC1, TNFRSF12A                                                                                                                                                                                                                                                                                                                                                                                                                                                                                                                                                                                                                                                                                                                                                                                                                                                                                                                                                                                                                                                                                                                                                                                                                                                                                                                                                                                                                                                                                                                                                                                                                                                                                                                                                                                                                                                                                                                                                                                                                                                                                                                                                                                                                                                                                                                                                                                                                                                                                                                                                                                                                                                                                                                                                                                                                                                                                                                                                                                                                                                                                                                                                                                                                                                                                                                                                                                                                                                                                                                                                                                                                                                                                                                                                                                                                                                                                                                                                                                                                                                                                                                                                                                                                                                                                                                                                                                                                                                                                 |  | 93 (7)   |
| Ins1                         |       | other                             |           | 1.372  | bias | 1.04E-04 | ALAS1, APOA1, CECPA, CECPD, GATA3, GSTA3, HK2, IL1B, IL6ST, JUN                                                                                                                                                                                                                                                                                                                                                                                                                                                                                                                                                                                                                                                                                                                                                                                                                                                                                                                                                                                                                                                                                                                                                                                                                                                                                                                                                                                                                                                                                                                                                                                                                                                                                                                                                                                                                                                                                                                                                                                                                                                                                                                                                                                                                                                                                                                                                                                                                                                                                                                                                                                                                                                                                                                                                                                                                                                                                                                                                                                                                                                                                                                                                                                                                                                                                                                                                                                                                                                                                                                                                                                                                                                                                                                                                                                                                                                                                                                                                                                                                                                                                                                                                                                                                                                                                                                                                                                                                                                           |  | 223 (23) |
| hemim                        |       | chemical - endogenous mammal      |           | 0.838  |      | 1.04E-04 | Cc2, CD68, FTH1, FTL, GSTP1, IL1B, JUN, MRC1, NQO1                                                                                                                                                                                                                                                                                                                                                                                                                                                                                                                                                                                                                                                                                                                                                                                                                                                                                                                                                                                                                                                                                                                                                                                                                                                                                                                                                                                                                                                                                                                                                                                                                                                                                                                                                                                                                                                                                                                                                                                                                                                                                                                                                                                                                                                                                                                                                                                                                                                                                                                                                                                                                                                                                                                                                                                                                                                                                                                                                                                                                                                                                                                                                                                                                                                                                                                                                                                                                                                                                                                                                                                                                                                                                                                                                                                                                                                                                                                                                                                                                                                                                                                                                                                                                                                                                                                                                                                                                                                                        |  | 220 (19) |
| KITLG                        |       | growth factor                     |           | 1.344  | bias | 1.09E-04 | CASP3, Cc2, Cc2A, CD4, CD44, Cc2A, CD86, CECPA, CSF1, CXCL12, FAPB5                                                                                                                                                                                                                                                                                                                                                                                                                                                                                                                                                                                                                                                                                                                                                                                                                                                                                                                                                                                                                                                                                                                                                                                                                                                                                                                                                                                                                                                                                                                                                                                                                                                                                                                                                                                                                                                                                                                                                                                                                                                                                                                                                                                                                                                                                                                                                                                                                                                                                                                                                                                                                                                                                                                                                                                                                                                                                                                                                                                                                                                                                                                                                                                                                                                                                                                                                                                                                                                                                                                                                                                                                                                                                                                                                                                                                                                                                                                                                                                                                                                                                                                                                                                                                                                                                                                                                                                                                                                       |  | 142 (16) |
| lysocephosphatidylcholine    |       | chemical - other                  |           | 1.692  |      | 1.09E-04 | Cc2, FAPB5, ICAM1, IL1B, JUN, LRP1, NQO2, SERPINE1                                                                                                                                                                                                                                                                                                                                                                                                                                                                                                                                                                                                                                                                                                                                                                                                                                                                                                                                                                                                                                                                                                                                                                                                                                                                                                                                                                                                                                                                                                                                                                                                                                                                                                                                                                                                                                                                                                                                                                                                                                                                                                                                                                                                                                                                                                                                                                                                                                                                                                                                                                                                                                                                                                                                                                                                                                                                                                                                                                                                                                                                                                                                                                                                                                                                                                                                                                                                                                                                                                                                                                                                                                                                                                                                                                                                                                                                                                                                                                                                                                                                                                                                                                                                                                                                                                                                                                                                                                                                        |  | 196 (19) |
| Bay 11-7082                  |       | chemical - kinase inhibitor       | Inhibited | -2.789 | bias | 1.09E-04 | BCL2L1, BMP2, Cc2, CD44, CD83, ICAM1, IL1B, SOD2                                                                                                                                                                                                                                                                                                                                                                                                                                                                                                                                                                                                                                                                                                                                                                                                                                                                                                                                                                                                                                                                                                                                                                                                                                                                                                                                                                                                                                                                                                                                                                                                                                                                                                                                                                                                                                                                                                                                                                                                                                                                                                                                                                                                                                                                                                                                                                                                                                                                                                                                                                                                                                                                                                                                                                                                                                                                                                                                                                                                                                                                                                                                                                                                                                                                                                                                                                                                                                                                                                                                                                                                                                                                                                                                                                                                                                                                                                                                                                                                                                                                                                                                                                                                                                                                                                                                                                                                                                                                          |  | 141 (15) |
| PLA2G2D                      |       | enzyme                            |           | -1.000 | bias | 1.12E-04 | Cc2, CD88, IL1B, MRC1                                                                                                                                                                                                                                                                                                                                                                                                                                                                                                                                                                                                                                                                                                                                                                                                                                                                                                                                                                                                                                                                                                                                                                                                                                                                                                                                                                                                                                                                                                                                                                                                                                                                                                                                                                                                                                                                                                                                                                                                                                                                                                                                                                                                                                                                                                                                                                                                                                                                                                                                                                                                                                                                                                                                                                                                                                                                                                                                                                                                                                                                                                                                                                                                                                                                                                                                                                                                                                                                                                                                                                                                                                                                                                                                                                                                                                                                                                                                                                                                                                                                                                                                                                                                                                                                                                                                                                                                                                                                                                     |  | 190 (16) |
| SCR (complex)                |       | complex                           |           | 1.354  | bias | 1.12E-04 | BMGALT1, BCL2L1, CASP3, Cc2A, CCR7, CD4, CD86, FAS, KLF4, LCK                                                                                                                                                                                                                                                                                                                                                                                                                                                                                                                                                                                                                                                                                                                                                                                                                                                                                                                                                                                                                                                                                                                                                                                                                                                                                                                                                                                                                                                                                                                                                                                                                                                                                                                                                                                                                                                                                                                                                                                                                                                                                                                                                                                                                                                                                                                                                                                                                                                                                                                                                                                                                                                                                                                                                                                                                                                                                                                                                                                                                                                                                                                                                                                                                                                                                                                                                                                                                                                                                                                                                                                                                                                                                                                                                                                                                                                                                                                                                                                                                                                                                                                                                                                                                                                                                                                                                                                                                                                             |  | 142 (12) |
| JNB                          |       | transcription regulator           |           | 1.109  | bias | 1.12E-04 | CD8, CD86, CXCL16, FOSL1, FTH1, IL1B, IL6ST, IL |  |          |

|                                                                                                                        |       |                                   |           |          |      |          |                                                                              |          |
|------------------------------------------------------------------------------------------------------------------------|-------|-----------------------------------|-----------|----------|------|----------|------------------------------------------------------------------------------|----------|
| Fcεr1                                                                                                                  |       | complex                           |           | 1,802    | bias | 3,19E-04 | BCL2A1, Cc2, CD83, CSF1, IL1B, JUN, MRC1                                     | 160 (17) |
| IL25                                                                                                                   |       | cytokine                          |           | 1,608    | bias | 3,19E-04 | Cc2, CSF3, F11R, GATA3, IL1B, IL1RL1, JAG1                                   | 179 (17) |
| CSF3                                                                                                                   | 1,184 | cytokine                          |           | 1,146    | bias | 3,20E-04 | BATF, BIRC3, Cc2, CCR7, CD14, CD44, CEBPA, CXCL12, GADD45B, ICAM1            | 141 (15) |
| reactive oxygen species                                                                                                |       | chemical toxicant                 |           | 1,824    | bias | 3,20E-04 | CASP3, CSF3, FAS, ICAM1, IL1B, JUN, KLF6, SERPINE1, SOD2, TNFAIP3            | 205 (18) |
| cardiotoxin                                                                                                            |       | chemical - other                  | Activated | 2,828    | bias | 3,21E-04 | CASP3, Cc2, CCNA2, CSF2RB, FLT3, IL1B, IL17R, ITGB7, MCM3, MEST              |          |
| goldilaminycin                                                                                                         |       | chemical - endogenous non-mar     | Inhibited | 2,724    | bias | 3,21E-04 | Cc2, CEBPD, GPR119, Hspa13, IL1, IL1, IRF5, JUN, KLF, RNASEL, RTN1           | 123 (11) |
| TRAF2                                                                                                                  |       | enzyme                            |           | 0,822    |      | 3,25E-04 | BIRC3, FAS, ICAM1, Muc1, PTPN14, RHBDP1, Serpin3a (includes others), TNFAIP3 | 100 (12) |
| zinc                                                                                                                   |       | chemical drug                     |           | -0,167   |      | 3,25E-04 | AKR1B10, CD86, FAS, IL1B, NFKBIA, SLC11A2, SLC30A1, SLC39A4                  | 182 (17) |
| IL22                                                                                                                   |       | cytokine                          |           | 1,334    | bias | 3,41E-04 | CLCA1, CXCL12, CYBA, FTH1, HSPB1, IL1B, IL36G, Muc1, SOD2, TGM3              | 154 (12) |
| lansoprazole                                                                                                           |       | chemical drug                     |           | -1,770   | bias | 3,41E-04 | BCL2A1, BIRC3, FAS, Fcγ3, JUN, KLF, RNASEL, SERPINE1, SOD2, TNFAIP3          | 132 (17) |
| medroxyprogesterone acetate                                                                                            |       | chemical drug                     |           | -1,019   |      | 3,41E-04 | CAMK4, CASP3, Cc2, CD44, FAS, ICAM1, IL1B, JUN, NEK2, Ngp1                   | 218 (25) |
| PTX3                                                                                                                   |       | other                             |           | -1,571   | bias | 3,48E-04 | Cc2, Cc8, GATA3, IL1B, JUN                                                   | 147 (16) |
| ACSL4                                                                                                                  |       | enzyme                            |           | -1,342   | bias | 3,48E-04 | CAMK10, ENPP1, FERMT1, PRKG1, RHOU                                           |          |
| vinblastine                                                                                                            |       | chemical drug                     | Activated | 2,213    | bias | 3,48E-04 | CD40, CD86, HLA-A, IL1B, SOD2                                                | 142 (17) |
| Cy223                                                                                                                  |       | enzyme                            |           | 0,983    | bias | 3,50E-04 | Cc2, CCNA2, CD86, IL36G                                                      |          |
| PPP2R5C                                                                                                                |       | other                             | Inhibited | 2,000    | bias | 3,50E-04 | BCL2A1, BIRC3, RELB, TNFAIP3                                                 | 117 (12) |
| P2RY2                                                                                                                  |       | G-protein coupled receptor        |           |          |      | 3,50E-04 | Cc2, GAP43, ICAM1, SERPINE1                                                  | 142 (17) |
| DAXX                                                                                                                   |       | transcription regulator           |           | -1,982   | bias | 3,50E-04 | CASP3, HSPB1, KLF3, SERPINE1                                                 | 208 (19) |
| SPB1                                                                                                                   |       | transcription regulator           | Activated | 2,813    | bias | 3,52E-04 | BLNK, BMP6, CD86, Hspa1b, KLF4, KLF3, LILRB3, P2RY10                         |          |
| HMGB1                                                                                                                  |       | transcription regulator           |           | 1,983    | bias | 3,52E-04 | CASP3, CD40, CD83, CD86, ICAM1, IL1B, MRC1, RELB                             | 161 (19) |
| SMAD1                                                                                                                  |       | transcription regulator           | Activated | 2,429    | bias | 3,56E-04 | CSF1, GADD45B, Hamp/Hamp2, ICAM1, ID1, RUNX2                                 | 158 (13) |
| PROC                                                                                                                   |       | peptidase                         |           | -0,294   | bias | 3,56E-04 | BCL2A1, Cc2, ICAM1, IL1B, SERPINE1, TNFAIP3                                  | 154 (16) |
| stallinon                                                                                                              |       | biologic drug                     | Activated | 2,449    | bias | 3,56E-04 | CSP1, IFI16, IL1B, IL36G, IL7R, SP110                                        | 97 (7)   |
| Nr1h                                                                                                                   |       | group                             | Inhibited | 2,723    | bias | 3,59E-04 | BMP6, Cc2, CCR7, CDMPD, CSF1, CSF3, HPD, IL1B, NFKBIZ, SP110                 | 169 (19) |
| SNAI1                                                                                                                  |       | transcription regulator           |           | 0,896    |      | 3,79E-04 | BMP4, CGN, CLDN4, FOSL1, GDF15, ID1, KRT8, LASP1, RUNX2, SDC1                | 226 (22) |
| dimethyl sulfoxide                                                                                                     |       | chemical drug                     | Activated | 2,578    | bias | 3,86E-04 | BMP2, BMP4, IFI16, IL1B, JUN, PTK2B, RUNX2, SLC11A2, Tcf7, Tpm1              | 206 (22) |
| G6 6976                                                                                                                |       | chemical - kinase inhibitor       | Inhibited | -2,607   | bias | 3,87E-04 | BMP2, BMP6, Cc2, CD83, CSF3, NFKBIA, SOD2                                    | 144 (16) |
| MEI                                                                                                                    |       | kinase                            |           | 0,633    | bias | 3,89E-04 | BMP, CD44, Hspa1b, HSPB1, IL1B, JUN, KLF4, NFKBIZ, SOD2                      | 173 (18) |
| Cmb                                                                                                                    |       | group                             |           | 3,91E-04 |      | 3,91E-04 | ANTXR1, ANTXR2, BMP6, CD14, CEBPA, CEBPD, CLMN, CSRP1, FAS, FOSL1            | 159 (11) |
| obetholic acid                                                                                                         |       | chemical drug                     |           | -1,347   |      | 4,01E-04 | APOA1, Cc2, CD86, CEBPA, ICAM1, IL1B                                         | 144 (17) |
| NGFR                                                                                                                   |       | transmembrane receptor            |           | 0,895    | bias | 4,07E-04 | CCNA2, DMD, IL1RL1, JUN, SERPINE1                                            | 162 (12) |
| TNFSF15                                                                                                                |       | cytokine                          | Activated | 2,200    | bias | 4,07E-04 | BIRC3, CCR7, CD40, CD83, CD86                                                | 155 (16) |
| crocidolite asbestos                                                                                                   |       | chemical toxicant                 |           | 1,985    | bias | 4,07E-04 | Cc2, CD44, FOSL1, JUN, ZFX                                                   | 225 (19) |
| proteasome inhibitor PSI                                                                                               |       | chemical - protease inhibitor     |           | 1,342    | bias | 4,07E-04 | BMP2, Cc2, FAS, MAPK6, RUNX2                                                 | 192 (16) |
| Tgf beta                                                                                                               |       | kinase                            |           | 1,334    | bias | 4,09E-04 | BASP1, Cc2, CCR7, CSF1, CSF3, GADD45B, GATA3, ID1, ID3, IL1B                 | 216 (20) |
| EP2AK3                                                                                                                 |       | kinase                            |           | 1,846    | bias | 4,17E-04 | ANG, BIRC3, Cc2, FOSL1, IL1B, JUN, KLF4, RELB, RNASEL                        | 182 (18) |
| VIP                                                                                                                    |       | other                             |           | -0,009   |      | 4,17E-04 | Cc2, CD40, CD86, CEBPD, GATA3, IL1B, IL1RL1, IRAK2, NFKBIA                   | 153 (17) |
| aspirin                                                                                                                |       | chemical reagent                  | Inhibited | 2,372    | bias | 4,17E-04 | APOA1, Cc2, CD40, CD86, CSF1, CSF3, GDF15, ICAM1, IL1B                       | 122 (16) |
| 1,2-dithiol-3-thione                                                                                                   |       | chemical reagent                  | Activated | 3,560    | bias | 4,24E-04 | AKR1B10, ALAS1, ANG, B4GALNT1, ESD, FTH1, GSTA3, GSTP1, MGLL, NQO1           | 45 (3)   |
| vitamin E                                                                                                              |       | chemical drug                     |           | -1,941   | bias | 4,26E-04 | APOA1, CD44, Hamp/Hamp2, IL1B, KLF6, SERPINE1, SLC11A2                       | 177 (19) |
| LEF1                                                                                                                   |       | transcription regulator           |           | 0,371    | bias | 4,26E-04 | CASP3, CD44, FAS, GATA3, IL7R, LCK, RUNX2                                    | 160 (12) |
| NB02                                                                                                                   |       | transcription regulator           |           | 0,115    |      | 4,26E-04 | AMY2A, BIRC3, GSTP1, HK2, OAT, PLA2G16, RELB                                 |          |
| IL17RC                                                                                                                 |       | transmembrane receptor            |           |          |      | 4,29E-04 | PLE1, STEAP4                                                                 |          |
| ZNF3858                                                                                                                |       | other                             |           |          |      | 4,29E-04 | FAS, PERP                                                                    |          |
| PARM1                                                                                                                  |       | other                             |           |          |      | 4,29E-04 | BMP2, BMP4                                                                   |          |
| diaziquone                                                                                                             |       | chemical drug                     |           |          |      | 4,29E-04 | CD40, IL1B                                                                   |          |
| cobimetinib                                                                                                            |       | chemical drug                     |           |          |      | 4,29E-04 | CD44, CSF3                                                                   |          |
| cyclic AMP                                                                                                             |       | chemical - endogenous mammal      | Activated | 2,925    | bias | 4,37E-04 | ANTXR1, ANTXR2, BMP2, CD86, CEBPA, CEBPD, GAP43, GATA3, IL1B, JUN            | 230 (22) |
| mannitol                                                                                                               |       | chemical - endogenous mammal      |           | 1,231    | bias | 4,43E-04 | Cc2, ICAM1, JUN, SOD2                                                        | 174 (21) |
| NR13                                                                                                                   |       | ligand-dependent nuclear receptor | Activated | 2,759    | bias | 4,46E-04 | ALAS1, APOA1, CYP3A7, GADD45B, GSTP1, HK1, ICAM1, PGD, STEAP4                | 139 (10) |
| PRPC1                                                                                                                  |       | transcription regulator           | Activated | 2,449    | bias | 4,50E-04 | Cc2, CD86, GDF15, HK2, LAMB3, NFKBIZ, NQO1                                   |          |
| GATA1                                                                                                                  |       | transcription regulator           |           | 1,117    | bias | 4,57E-04 | BMP6, CAVIN1, CEBPA, CXCR3, ENPP1, GATA3, IL1RL1, IL6ST, IL7R, JDP2          |          |
| EPO                                                                                                                    |       | cytokine                          |           | -0,404   | bias | 4,57E-04 | ATOH8, BMP4, CASP3, CTSZ, CXCL12, FABP5, FAS, GATA3, GDF15, Hamp/Hamp2       | 210 (16) |
| butyl N-3-[4-(imidazol-1-yl)methyl                                                                                     |       | chemical reagent                  |           |          |      | 4,58E-04 | CASP3, IL1B, MLKL                                                            |          |
| CD5L                                                                                                                   |       | transmembrane receptor            |           |          |      | 4,58E-04 | Cc2, Cc8, IL1B                                                               |          |
| FE1A1                                                                                                                  |       | transcription regulator           |           |          |      | 4,58E-04 | Cc2, CD86, IL1B                                                              | 83 (7)   |
| GIPR                                                                                                                   |       | G-protein coupled receptor        |           |          |      | 4,58E-04 | Cc2, Cc8, Tcf7                                                               | 143 (13) |
| MIA-602                                                                                                                |       | chemical reagent                  |           |          |      | 4,58E-04 | CASP3, Cc2, IL1B                                                             |          |
| GSK4J                                                                                                                  |       | chemical reagent                  |           |          |      | 4,58E-04 | CD40, CD83, CD86                                                             |          |
| Fc gamma receptor                                                                                                      |       | group                             | Activated | 2,200    | bias | 4,75E-04 | CCNA2, CD40, CD86, ICAM1, TNFAIP3                                            | 117 (17) |
| TRB                                                                                                                    |       | transmembrane receptor            |           | 0,468    | bias | 4,75E-04 | CD44, CD8A, CXCR3, FAS, GATA3                                                | 147 (11) |
| 8-bromo-cAMP                                                                                                           |       | chemical reagent                  |           | -0,731   | bias | 4,79E-04 | ALDH2, APOA1, BMP2, Cc2, FAS, GSTP1, IL1B, JUN, KRT8, NQO1                   | 164 (19) |
| ATN1                                                                                                                   |       | transcription regulator           |           |          |      | 4,91E-04 | BASP1, BTG3, CAMK4, Cd24a, IFI16, JUP, LTB2, Marcks, TIAM1, TM6SF1           |          |
| glucocorticoid                                                                                                         |       | chemical drug                     |           | 0,268    |      | 4,92E-04 | Cc2, CD40, CD86, CEBPD, CSF1, CSF3, CYP3A7, FAS, ICAM1, IL1B                 | 170 (15) |
| PTPM                                                                                                                   |       | phosphatase                       | Inhibited | -2,412   | bias | 5,04E-04 | Cc2, CCR7, CD44, CD86, IL1B, LYN                                             | 155 (16) |
| zymosan                                                                                                                |       | chemical - endogenous non-mar     |           | 1,988    | bias | 5,12E-04 | Cc2, CD40, CD86, CSF1, CSF3, DEPT1, IL1B                                     | 134 (15) |
| 3,3'-diindolylmethane                                                                                                  |       | chemical drug                     |           | 1,937    | bias | 5,12E-04 | FAS, GDF15, HLA-A, IL1B, KRT19, NFKBIA, NQO1                                 | 215 (21) |
| PI3K (family)                                                                                                          |       | group                             |           | 1,510    | bias | 5,45E-04 | AKR1B10, BIRC3, CXCL12, FTH1, HK1, IL1B, NQO1, PREX1, SERPINE1               | 195 (20) |
| IL36A                                                                                                                  |       | cytokine                          | Activated | 2,490    | bias | 5,50E-04 | Cc2, CSF3, IL1B, IL1B, IL36G, NFKBIZ                                         | 87 (7)   |
| prostaglandin E1                                                                                                       |       | chemical - endogenous mammal      |           | -1,192   | bias | 5,51E-04 | CD14, CD40, CD86, ICAM1                                                      | 211 (19) |
| TMSB4                                                                                                                  |       | group                             |           | 1,964    | bias | 5,51E-04 | BMP2, BMP4, RUNX2, SERPINE1                                                  | 132 (12) |
| AORB3                                                                                                                  |       | G-protein coupled receptor        |           |          |      | 5,51E-04 | Cc2, CXCL12, IL1B, JUN                                                       | 178 (19) |
| BIRC2                                                                                                                  |       | enzyme                            |           |          |      | 5,51E-04 | BIRC3, CCNA2, CSF1, CSF3                                                     | 146 (11) |
| Usp17a (includes others)                                                                                               |       | peptidase                         |           | 1,987    | bias | 5,51E-04 | Cc2, CD44, IL1B, KLF4                                                        | 87 (7)   |
| ethoxyquin                                                                                                             |       | chemical toxicant                 |           | 1,934    | bias | 5,51E-04 | FTH1, GSTA3, GSTP1, NQO1                                                     |          |
| metyrapone                                                                                                             |       | chemical drug                     |           | 0,000    | bias | 5,51E-04 | ALAS1, CXCL12, ICAM1, IL1B                                                   | 124 (11) |
| CD38                                                                                                                   |       | enzyme                            |           | 1,964    | bias | 5,53E-04 | ANKK6, CD44, CD86, CSF2RB, HIGD1A, ICAM1, ITGB7, NEK2, PDLM1, SDC1           |          |
| Raf                                                                                                                    |       | group                             |           |          |      | 5,59E-04 | CSF1, GDF15, IFI16, JUN, RNK3, SLC45A3, TNFAIP3                              | 220 (20) |
| FANCC                                                                                                                  |       | other                             |           |          |      | 5,59E-04 | CXCL12, GDF15, IL1B, JAG1, OAT, RND3, TAX1BP3                                | 147 (16) |
| TBX21                                                                                                                  |       | transcription regulator           |           | -0,180   |      | 5,59E-04 | CXCR3, GATA3, GZMA, IL1RL1, IL6ST, IL7R, Tcf7                                | 159 (15) |
| ADAM10                                                                                                                 |       | peptidase                         |           |          |      | 5,63E-04 | CSF1, CXCL12, CXCL16, DTN1, IL36G, IL6ST, LCK, SYT1                          |          |
| NLRX1                                                                                                                  |       | other                             | Inhibited | 2,449    | bias | 5,63E-04 | BIRC3, CD40, IL1B, NFKBIA, RELB, TNFAIP3                                     | 158 (13) |
| sphingosine-1-phosphate                                                                                                |       | chemical - endogenous mammal      | Activated | 2,044    | bias | 6,08E-04 | Cc2, CD44, FAS, GAP43, ICAM1, JUN, RUNX2, SERPINE1                           | 167 (19) |
| PDX1                                                                                                                   |       | transcription regulator           |           | 1,066    | bias | 6,08E-04 | Cc2, CD44, GAP43, HK1, ID1, ID3, IL1B, JUN, KLF6, KRT8                       | 120 (7)  |
| RIPK2                                                                                                                  | 0,574 | kinase                            |           | 2,621    | bias | 6,11E-04 | ACOD1, Cc2, CD40, CD86, ICAM1, RASGRP1, SOD2                                 | 132 (17) |
| TERT                                                                                                                   |       | enzyme                            |           | -0,686   |      | 6,19E-04 | ICAM1, IFI16, IL1B, JUP, KLF3, KRT19, NFKBIA, PCDHGA3, RASA3, SOD2           | 191 (14) |
| TSC2D3                                                                                                                 |       | transcription regulator           |           | 1,053    | bias | 6,27E-04 | CD86, CD86, CEBPA, ICAM1, IL1B, RUNX2                                        | 130 (7)  |
| TIMP3                                                                                                                  |       | enzyme                            |           | 0,816    | bias | 6,27E-04 | BMP4, FAS, JUN, KLF4, LAMC2, SERPINE1                                        | 225 (18) |
| APOA1                                                                                                                  | 4,105 | transporter                       |           | -1,636   | bias | 6,27E-04 | APOA1, Cc2, ICAM1, IL1B, SOD2, XDH                                           | 153 (19) |
| OSCAR                                                                                                                  |       | other                             |           | 1,342    | bias | 6,34E-04 | CD40, CD83, CD86, ICAM1, RRAS                                                | 153 (15) |
| GATA3                                                                                                                  | 7,490 | transcription regulator           |           | 0,470    | bias | 6,34E-04 | BATF, BCL11A, BMP6, CEBPA, GATA3, GZMA, ICAM1, IL1RL1, IL7R, KLF4            | 180 (16) |
| CCP1                                                                                                                   |       | transporter                       |           | -0,194   | bias | 6,45E-04 | ALAS1, CASP3, Cd24a, CD86, GDF15, GSTO1, IL1B, PGD, RNASEL, SERPINE1         | 85 (7)   |
| CD36                                                                                                                   |       | transmembrane receptor            |           | 1,170    | bias | 6,52E-04 | APOA1, CD86, CSF3, FAS, ICAM1, IL1B, LRP1, SERPINE1                          | 162 (18) |
| AG490                                                                                                                  |       | chemical - kinase inhibitor       | Inhibited | -2,792   | bias | 6,52E-04 | BIRC3, CASP3, Cc2, CD86, ICAM1, IL1B, LYN, SOD2                              | 224 (21) |
| CND01                                                                                                                  |       | transcription regulator           |           | 0,132    |      | 6,57E-04 | CCNA2, CD44, CD6, CDGAT, DONSON, HOMER2, HSPB1, ID1, ID3, KLF3               | 137 (7)  |
| melatonin                                                                                                              |       | chemical - endogenous mammal      |           | 1,768    | bias | 6,60E-04 | BMP2, CASP3, FAS, GDF15, IL1B, KRT19, NQO1, RUNX2, SOD2                      | 181 (19) |
| nicotine                                                                                                               |       | chemical drug                     |           | 1,115    | bias | 6,67E-04 | BMP2, CASP3, Cc2, CD40, CD44, CD86, GATA3, ICAM1, ID1, IL1B                  | 148 (16) |
| sphingosylphosphocholine                                                                                               |       | chemical - endogenous mammal      |           |          |      | 6,77E-04 | Cc2, ICAM1, JUN                                                              | 185 (19) |
| C8                                                                                                                     |       | complex                           |           |          |      | 6,77E-04 | Cc2, ICAM1, IL1B                                                             | 107 (9)  |
| SLC16A3                                                                                                                |       | transporter                       |           |          |      | 6,77E-04 | CASP3, HK2, IL1B                                                             |          |
| salmonella typhimurium lipopolysaccharide                                                                              |       | chemical - endogenous non-mar     |           |          |      | 6,77E-04 | Cc2, CD86, IL1B                                                              |          |
| TNFRSF17                                                                                                               |       | transmembrane receptor            |           |          |      | 6,77E-04 | CD40, CD86, ICAM1                                                            | 136 (15) |
| ATG16L1                                                                                                                |       | enzyme                            |           |          |      | 6,77E-04 | IL1B, NFKBIA, SOD2                                                           | 112 (9)  |
| RTKN                                                                                                                   | 1,276 | other                             |           |          |      | 6,77E-04 | BCL2A1, BIRC3, TNFAIP3                                                       | 81 (9)   |
| C7                                                                                                                     |       | other                             |           |          |      | 6,77E-04 | Cc2, ICAM1, IL1B                                                             | 107 (9)  |
| DEK                                                                                                                    |       | transcription regulator           |           |          |      | 6,77E-04 | BIRC3, Cc2, NFKBIA                                                           | 95 (8)   |
| 1,1-bis(3'-indolyl)-1-(4-trifluoromethylphenyl)-4-(4-trifluoromethylphenyl)-5-(4-trifluoromethylphenyl)-1,3,5-triazine |       | chemical reagent                  |           |          |      | 6,77E-04 | CAV2, GDF15, KLF3                                                            | 160 (7)  |
| guromycin                                                                                                              |       | chemical - endogenous non-mar     |           |          |      | 6,78E-04 | CASP3, CD40, IL1B, SERPINE1                                                  | 186 (22) |
| TP53ICOR1                                                                                                              |       | chemical reagent                  | Activated | 2,000    | bias | 6,78E-04 | BIRC3, FAS, IL1B, SOD2                                                       | 174 (13) |
| S-2,2-bis[4-methoxybenzyl]propyl-ox                                                                                    |       | group                             |           | 1,872    | bias | 6,78E-04 | Apo1a (includes others), CD40, CD86, ICAM1                                   | 126 (15) |
| Pkcδ                                                                                                                   |       | other                             | Activated | 2,673    | bias | 6,89E-04 | APOA1, DMD, FAS, FOSL1, GADD45B, GAP43, IL1B, JUN, KLF6, KRT8                | 207 (19) |
| PRKAG3                                                                                                                 |       | other                             |           |          |      | 7,14E-04 | ALAS1, DDIT4L, FTL, ID1, KLF4, PLIN3, POLE4, RHOU, SLC2A3, TSPAN8            |          |
| GNAT14                                                                                                                 |       | enzyme                            |           |          |      | 7,24E-04 | ANKK3, BMP2, BMP4, ENPP1, HK2, KLF6, XDH                                     |          |
| indinavir sulfate                                                                                                      |       | chemical drug                     |           | 0,447    | bias | 7,27E-04 | CASP3, GATA3, GSTP1, ICAM1, IL1B                                             | 180 (21) |
| SN-38                                                                                                                  |       | chemical drug                     |           | 1,982    | bias | 7,27E-04 | BIRC3, BMP6, FAS, GDF15, HK2                                                 | 183 (14) |
| DDIT3                                                                                                                  |       | transcription regulator           |           | -1,054   | bias | 7,48E-04 | CEBPA, CEBPD, DOK4, GALNT4, HPD, IL1B, IRAK2, JAG1, Ngp1                     | 210 (16) |
| mR-146a-5p (and other miRNA)                                                                                           |       | mature microRNA                   | Inhibited | -2,791   | bias | 7,52E-04 | ATOH8, CCNA2, CD40, IL36G, IRAK2, IRF5, NFKBIA, SYT1                         | 91 (6)   |
| NOG                                                                                                                    |       | growth factor                     |           | 1,664    | bias | 7,73E-04 | BMP2, CAVIN1, DMD, ICAM1, Ngp, RUNX2                                         | 217 (22) |
| PTPRJ                                                                                                                  |       | phosphatase                       | Activated | 2,236    | bias | 7,73E-04 | BMP2, BMP4, Cc2, FAS, ID3, RUNX2                                             | 189 (23) |
| minocycline                                                                                                            |       | chemical drug                     |           | -1,775   | bias | 7,78E-04 | CCNA2, CEBPD, NFKBIZ, OASL, Vmn3, ZC3H12A                                    |          |
| YY1                                                                                                                    |       | transcription regulator           |           | 0,447    | bias | 7,87E-04 | CASP3, Cc2, CD86, GATA3, ICAM1, IL1B, IL6ST                                  | 174 (17) |
| HDAC3                                                                                                                  |       | transcription regulator           |           | 0,751    | bias | 8,01E-04 | ALCAM, BLNK, BMP4, BMP6, CCNA2, CXCL12, DMD, FAS, ID3, IL1B                  | 202 (19) |
| Pka                                                                                                                    |       | complex                           |           | 1,915    | bias | 8,16E-04 | BIRC3, BMP2, ICAM1, JUP, KLF3, NFKBIA, RELB, SERPINE1                        | 218 (23) |
| Fibrinogen                                                                                                             |       | complex                           |           | 1,929    | bias | 8,24E-04 | ANTXR1, ANTXR2, CAMK4, CCR7, CD14, CD40, CD44, JUN, KLF6, MEST               | 200 (18) |
| ITGA9                                                                                                                  | 0,739 | other                             | Activated | 2,000    | bias | 8,24E-04 | Cc2, CD40, ICAM1, IL1B                                                       | 133 (17) |
| RPS6KA5                                                                                                                |       | kinase                            |           |          |      | 8,24E-04 | Cc2, CXCL12, CXCL14, IL1B                                                    | 146 (12) |
| PCDH11Y                                                                                                                |       | other                             | Activated | 2,000    | bias | 8,24E-04 | CCR7, FOSL1, IL1B, JUN                                                       | 191 (21) |
| IL37                                                                                                                   |       | cytokine                          |           | -1,938   | bias | 8,24E-04 | BMP4, CD44, FOSL1, JUN                                                       | 130      |

|                                                         |       |                                 |           |          |      |          |                                                                         |          |
|---------------------------------------------------------|-------|---------------------------------|-----------|----------|------|----------|-------------------------------------------------------------------------|----------|
| antihistamine                                           |       | chemical drug                   |           | 9.218    | bias | 9.44E-04 | BIRC3, ICAM1, IL1B, NQO1, RUNX2                                         | 142 (10) |
| KDH                                                     | 0.689 | enzyme                          |           | 0.094    |      | 9.44E-04 | Cc2, CEPBA, ID3, IL1B, SERPINE1                                         | 224 (24) |
| CD80                                                    |       | transmembrane receptor          |           |          |      | 9.44E-04 | CASP3, CD28, FAS, ICAM1, IL1B                                           | 161 (20) |
| ltp                                                     |       | group                           |           |          |      | 9.52E-04 | FTH1, FTL, SLC11A2                                                      |          |
| RBPJL                                                   |       | transcription regulator         |           |          |      | 9.52E-04 | AMY2A, CPA2, CTRB2                                                      |          |
| SELE                                                    |       | transmembrane receptor          |           |          |      | 9.52E-04 | Cc2, CSF3, IL1B                                                         | 148 (17) |
| RANBP9                                                  |       | other                           |           |          |      | 9.52E-04 | GAP43, JUN, PTK2B                                                       | 130 (7)  |
| FTH1                                                    | 0.558 | enzyme                          |           |          |      | 9.52E-04 | CD86, FTH1, FTL                                                         | 36 (3)   |
| TRF2                                                    |       | transporter                     |           |          |      | 9.52E-04 | BMP6, GDF15, Hamp/Tamp2                                                 | 120 (8)  |
| sodium dodecyl sulfate                                  |       | chemical drug                   |           |          |      | 9.52E-04 | FABP5, IL1B, SERPINE2                                                   |          |
| chemokine                                               |       | chemical drug                   |           |          |      | 9.52E-04 | DEPP1, HPN, SL, C2A3                                                    |          |
| lin mesoporphyrin                                       |       | chemical drug                   |           |          |      | 9.52E-04 | Cc2, ICAM1, IL1B                                                        | 99 (7)   |
| pepstatin                                               |       | chemical - protease inhibitor   |           |          |      | 9.52E-04 | BMP2, CD8, STC2                                                         |          |
| perilla alcohol                                         |       | chemical drug                   |           |          |      | 9.52E-04 | BCL2A1, IL1B, NFKBIA                                                    | 116 (11) |
| NKS                                                     |       | enzyme                          |           |          |      | 9.56E-04 | C08, CD86, HLA-A, IFI16, IL1B, MCM3, MEST, NQO1, PERP, SDC1             | 149 (17) |
| L27                                                     |       | cytokine                        | Inhibited | 2.804    | bias | 9.57E-04 | CD14, CD86, CEPBD, DEPP1, GAT3, HLA-A, ICAM1, IL1B, LAG3, MRC1          | 185 (17) |
| lfn gamma                                               |       | complex                         |           | 2.226    | bias | 9.90E-04 | CASP3, Cc2, CD86, CXCL16, CXCR3, FAS, ICAM1, IL1B                       | 157 (20) |
| lactosylceramide                                        |       | chemical - endogenous mammal    |           |          |      | 9.91E-04 | Cc2, CD40, ICAM1, RELB                                                  | 144 (15) |
| Pka                                                     |       | group                           |           | 1.067    | bias | 9.91E-04 | HK2, JUN, SOD2, VCL                                                     | 180 (16) |
| EF2G2                                                   |       | translation regulator           |           | 1.01E-04 |      | 9.91E-04 | JUN, KLF4, KRT19, SERPINE2                                              |          |
| LRPAP1                                                  |       | other                           |           | -0.308   | bias | 9.91E-04 | Cc2, IL1B, LRP1, SERPINE1                                               | 144 (16) |
| EPCAM                                                   |       | other                           |           | -0.762   | bias | 9.91E-04 | FABP5, FOSL1, ID1, JUN                                                  | 164 (13) |
| GRN                                                     |       | growth factor                   |           |          |      | 9.91E-04 | Cc2, CTSZ, ICAM1, IL1B                                                  | 212 (19) |
| ketamine                                                |       | chemical drug                   |           |          |      | 9.91E-04 | CASP3, HK1, KLF6, NQO1                                                  | 102 (7)  |
| apocidin                                                |       | chemical - endogenous non-mar   |           | 0.000    |      | 9.91E-04 | AMPD3, FAS, HSPD, ITGB7                                                 |          |
| IF16                                                    | 2.317 | transcription regulator         |           | 1.815    | bias | 1.00E-03 | CD28, CD81, ICAM1, IFI16, IL1B, IL7R, NFKBIA                            | 211 (20) |
| HTT                                                     |       | transcription regulator         |           | 1.372    | bias | 1.00E-03 | APOA1, BASP1, BTG3, CIR, CAMK4, CASP3, Cc2, d4a, CD9, CEPBA, FOSL1      | 232 (21) |
| PAPR1                                                   |       | enzyme                          |           | 0.537    | bias | 1.01E-03 | Cc2, CXCL12, FAS, GBP6, GDF15, ICAM1, IL1B, JUN, KLF3                   | 215 (20) |
| aluminum chloride                                       |       | chemical drug                   |           | 0.923    | bias | 1.01E-03 | B4GAL, T1, BMP2, BMP4, CD44, GAT3, GDF15, KLF3, KRT20, Muc6a            | 219 (26) |
| cholesterol                                             |       | transcription regulator         |           |          |      | 1.04E-03 | CSF2RB, FLT3, IL1B, LCK, LYN, RUNX2                                     | 110 (7)  |
| cholesterol                                             |       | chemical - endogenous mammal    |           | 1.021    | bias | 1.04E-03 | CAMK1D, CAV2, Cc2, CD14, CD86, CSF1, FABP5, ICAM1, IL1B, SMO            | 137 (17) |
| KMT2D                                                   |       | transcription regulator         |           | 1.372    | bias | 1.04E-03 | BTG3, CDCA7, GJB2, GPRC5C, KLF4, KRT23, LAMB3, LCK, POLE4, PPIC         |          |
| TLR2                                                    |       | transmembrane receptor          | Activated | 3.226    | bias | 1.05E-03 | BMP2, Cc2, CD40, CD86, CEPBD, CSF3, GAT3, GAT3, ICAM1, IL1B, IRAK3      | 148 (18) |
| phosphatidic acid                                       |       | chemical - other                | Activated | 2.781    | bias | 1.06E-03 | Cc2, CD14, CSF1, ICAM1, IL1B, JUN, RALA, SERPINE1                       | 149 (19) |
| NQO1                                                    | 1.033 | enzyme                          |           | 1.387    | bias | 1.07E-03 | BIRC3, CD8, CEPBA, CXCL12, CXCR3                                        | 105 (7)  |
| IGHM                                                    |       | transmembrane receptor          |           | -0.577   | bias | 1.07E-03 | Cc2, CD86, FAS, IL1B, ILJUN                                             | 191 (20) |
| nevalonic acid                                          |       | chemical - endogenous mammal    |           | 1.477    | bias | 1.07E-03 | APOA1, CD40, ICAM1, IL1B, SERPINE1                                      | 171 (19) |
| Cc2                                                     |       | other                           |           | 0.990    | bias | 1.07E-03 | ANXA3, B4GALNT1, CD86, PAD3, FOSL1, PL2A2, SERPINE1, SYTL2, TNAGL1      | 178 (20) |
| Growth hormone                                          |       | group                           |           | 1.098    | bias | 1.08E-03 | ARID5B, BMP2, BMP4, CEPBA, CEPD, FTH1, GDF15, GSTP1, ID1, JUN           | 227 (18) |
| Notch                                                   |       | CDCA7                           |           | 1.144    | bias | 1.08E-03 | CDCA7, GAD64S6, GAT3, ID1, ID3, JAG1, Nes                               | 123 (14) |
| Sos                                                     |       | group                           |           |          |      | 1.09E-03 | B4GAL, T1, CD44, DOCK1, HPDGS, IL36G, KLF6, MAPK6, Nrg1, SEMA3B, SEMA3E |          |
| 2,4-amino-1-isopropyl-1H-pyrazole                       |       | chemical reagent                |           | 0.859    | bias | 1.10E-03 | BMP2, CIR, CD44, FOSL1, ID1, ID3, KLF16, MCM3, SDC4, SERPINE1           | 118 (12) |
| CD86                                                    |       | chemical drug                   | Activated | 2.552    | bias | 1.10E-03 | BMP2, CD86, CCKAR, CXCL12, FAS, FTH1, GAP43, GJB2, ICAM1, IL1B          | 178 (20) |
| adenosine                                               |       | chemical - endogenous mammal    |           | -0.394   | bias | 1.14E-03 | CD28, CD86, ICAM1, IL1B, Saa3, SERPINE1                                 | 197 (21) |
| CLEC4G                                                  |       | other                           |           | 0.816    | bias | 1.14E-03 | BMP2, CSF1, CSF3, FLT3, IL1B, Nrg1                                      |          |
| PAX5                                                    |       | transcription regulator         |           | -0.730   | bias | 1.14E-03 | BLNK, CD40, FLT3, HK2, SDC1, SL, C2A3                                   |          |
| FOSL2                                                   |       | transcription regulator         | Activated | 2.219    | bias | 1.14E-03 | Cc2, FAS, FOSL1, IL1B, RELB, RUNX2                                      | 130 (11) |
| biacastamide                                            |       | chemical - endogenous mammal    |           | 1.688    | bias | 1.14E-03 | BCL2A1, CD14, CD40, CXCL12, ICAM1, SL, C3A42                            | 149 (15) |
| CTR9                                                    |       | chemical drug                   |           | 1.000    | bias | 1.18E-03 | CXCL12, RASGRP1, SDC1, TIAM1                                            |          |
| epilcatechin gallate                                    |       | chemical drug                   |           |          |      | 1.18E-03 | GDF15, ICAM1, LYN, PERP                                                 | 96 (7)   |
| evodiamine                                              |       | chemical - endogenous non-mar   |           | -1.715   | bias | 1.18E-03 | BCL2A1, BIRC3, CASP3, ICAM1                                             | 86 (7)   |
| chelyerythrine                                          |       | chemical drug                   |           | -1.000   | bias | 1.18E-03 | Cc2, CD86, ICAM1, NFKBIA                                                | 116 (11) |
| TNFRSF1B                                                |       | transmembrane receptor          |           | 1.809    | bias | 1.20E-03 | CASP3, CXCL12, FAS, ICAM1, JUN, SERPINE1, SOD2, TNFAIP3                 | 134 (16) |
| MEC2                                                    |       | transcription regulator         |           | -1.400   | bias | 1.21E-03 | ICAM1, ID1, ID3, LRP1, TNFAIP3                                          |          |
| NR2F1                                                   |       | ligand-dependent nuclear recept |           | 0.000    | bias | 1.21E-03 | ALDH2, APOA1, FNBP1, GDF15, JAG1                                        |          |
| miroxantone                                             |       | chemical drug                   |           | 1.067    | bias | 1.21E-03 | FAS, IFI16, IL1B, KLF3, PERP                                            | 167 (13) |
| pipecolinol                                             |       | chemical drug                   |           | -1.000   | bias | 1.21E-03 | BMP2, Cc2, CYP17, ICAM1, IL1B                                           |          |
| IRI76                                                   |       | enzyme                          |           |          |      | 1.25E-03 | BIRC3, Cc2, CSF1, IL1, LTR1, IRAK3, SOD2                                | 212 (16) |
| miR-145-5p (and other miRNAs)                           |       | mature microRNA                 | Inhibited | -2.411   | bias | 1.25E-03 | CNNA2, F11R, KLF4, RTKN, SERPINE1, SOD2                                 |          |
| CD14                                                    | 1.316 | transmembrane receptor          | Activated | 2.392    | bias | 1.25E-03 | BCL2A1, Cc2, CXCL12, ICAM1, IL1B, TNFAIP3                               | 144 (16) |
| MAP2K1/2                                                |       | group                           |           | 1.771    | bias | 1.26E-03 | Cc2, FOSL1, HK2, HSPB1, IL1B, JAG1, JUN                                 | 189 (21) |
| PTPN11                                                  |       | phosphatase                     |           | 1.254    | bias | 1.26E-03 | CD14, CD86, CEPBA, CSF1, GAB1, JUN, PERP                                | 184 (23) |
| SFTPA1                                                  |       | transporter                     |           | -1.087   | bias | 1.26E-03 | Cc2, GPRH8, IL1B, IL1RL1, MRC1, SERPINE1, TCEA3                         | 138 (15) |
| galactosylceramide                                      |       | chemical - endogenous mammal    |           | 1.688    | bias | 1.27E-03 | CD40, CD86                                                              |          |
| C10orf12                                                |       | other                           |           |          |      | 1.27E-03 | Cc2, IL1B                                                               | 103 (7)  |
| RIPK1                                                   |       | transcription regulator         |           |          |      | 1.27E-03 | KLF4, POLE4                                                             |          |
| ASH1L                                                   |       | transcription regulator         |           |          |      | 1.27E-03 | IRAK3, TNFAIP3                                                          |          |
| KLHL21                                                  |       | other                           |           |          |      | 1.27E-03 | NFKBIA, NFKBIZ                                                          |          |
| CNDP2                                                   |       | peptidase                       |           |          |      | 1.27E-03 | CD44, CXCR3                                                             |          |
| Ap1 gamma                                               |       | group                           |           |          |      | 1.27E-03 | CD28, HLA-A                                                             |          |
| CARD8                                                   |       | other                           |           |          |      | 1.27E-03 | BCL2A1, IL1B                                                            |          |
| FTMT                                                    |       | enzyme                          |           |          |      | 1.27E-03 | FTH1, FTL                                                               |          |
| STRAP                                                   |       | other                           |           |          |      | 1.27E-03 | JUN, SERPINE1                                                           |          |
| DeS2                                                    |       | other                           |           |          |      | 1.27E-03 | CD24a, CD40                                                             |          |
| TLR4                                                    |       | enzyme                          |           |          |      | 1.27E-03 | Cc2, TNFAIP3                                                            | 142 (10) |
| 1-thapsigal                                             |       | chemical reagent                |           |          |      | 1.27E-03 | CD40, CD86                                                              |          |
| ellipticine                                             |       | chemical reagent                |           |          |      | 1.27E-03 | CD40, IL1B                                                              |          |
| prostratin                                              |       | chemical - endogenous non-mar   |           |          |      | 1.27E-03 | CASP3, ICAM1                                                            | 95 (7)   |
| Mn2+                                                    |       | chemical - endogenous mammal    |           |          |      | 1.27E-03 | GAP43, ICAM1                                                            |          |
| levulamide                                              |       | chemical drug                   |           |          |      | 1.29E-03 | FAS, ICAM1, IL1B                                                        | 126 (11) |
| Trail8                                                  |       | other                           |           |          |      | 1.29E-03 | Cc2, CD40, CD86                                                         | 135 (11) |
| GPR132                                                  |       | G-protein coupled receptor      |           |          |      | 1.29E-03 | Cc2, ICAM1, MRC1                                                        | 175 (13) |
| ACVR2A                                                  |       | kinase                          |           |          |      | 1.29E-03 | Hamp/Tamp2, ICAM1, ID1                                                  | 97 (4)   |
| APDH                                                    |       | transporter                     |           |          |      | 1.29E-03 | CD40, CD86, CD86                                                        | 156 (18) |
| MAS1                                                    |       | G-protein coupled receptor      |           |          |      | 1.29E-03 | Cc2, IL1B, MRC1                                                         | 179 (17) |
| NDPFI1                                                  |       | other                           |           |          |      | 1.29E-03 | IL1B, LYN, SLC11A2                                                      |          |
| 2-[6-isopropyl-6-[(4-(2-pyridyl)yl]nz (includes others) |       | chemical - kinase inhibitor     |           |          |      | 1.29E-03 | Cc2, CNNA2, CD86                                                        |          |
| miR10X1                                                 |       | cytokine                        |           |          |      | 1.29E-03 | CD40, CD86, CD86                                                        |          |
| ERG                                                     |       | enzyme                          |           | 0.000    | bias | 1.34E-03 | CASP3, Cc2, CD14, CXCL12, ICAM1, ID1, ID3, IL1B, NQO1                   | 119 (8)  |
| TSLP                                                    |       | transcription regulator         |           | 1.000    | bias | 1.34E-03 | ARHGAP28, BIRC3, CAMK1D, CNNA2, DOCK1, DOCK10, ICAM1, KLF3, MYO1D, RRAS | 197 (21) |
| CEACAM1                                                 |       | cytokine                        |           | 1.966    | bias | 1.35E-03 | CCR7, CD40, CD83, CD86, ICAM1                                           | 154 (16) |
| Tcf7                                                    | 4.054 | transporter                     |           | 1.342    | bias | 1.35E-03 | ANG, CD40, CD86, CSF3, ICAM1                                            | 176 (18) |
| nonocostaline                                           |       | transcription regulator         |           | -1.167   | bias | 1.35E-03 | BATF, GAT3, G2M4, IL7R, LYN                                             |          |
| RETNLB                                                  |       | chemical toxicant               |           | 0.600    | bias | 1.35E-03 | Cc2, GAP43, ID1, ID3, IL1B                                              | 103 (7)  |
| Gsk3                                                    |       | other                           | Activated | 2.630    | bias | 1.36E-03 | CASP3, Cc2, CD8, CD86, IL1B, Saa3, TNAGL1                               | 197 (18) |
| JUNO                                                    |       | group                           |           | 0.911    | bias | 1.36E-03 | CD40, CEPBA, GDF15, ICAM1, IL1B, JUN, TNFAIP3                           | 185 (16) |
| JUNO                                                    |       | transcription regulator         |           |          |      | 1.36E-03 | ALA51, Cc2, CXCL16, FOSL1, FTH1, RUNX2, SDC1                            | 91 (9)   |
| glabazone                                               |       | chemical drug                   |           |          |      | 1.36E-03 | CAV2, Cc2, ICAM1, JUN, KLF3, NFKBIA, SERPINE1                           | 247 (24) |
| Ac-Lys-Lys-Leu-norleucinal                              |       | chemical - protease inhibitor   |           | -0.508   | bias | 1.36E-03 | CAMK4, CASP3, CEPBA, HLA-A, ICAM1, NFKBIA, RUNX2                        | 182 (18) |
| dehydroandrosterone                                     |       | chemical - endogenous mammal    |           | -0.742   | bias | 1.36E-03 | BMP4, Cc2, ICAM1, KLF3, NFKBIA, RACK1, Saa3                             | 197 (22) |
| IL12B                                                   |       | cytokine                        |           | 1.525    | bias | 1.37E-03 | Cc2, CD86, CEPBD, ICAM1, IL1B, PIK3AP1                                  | 182 (18) |
| TCF12                                                   |       | transcription regulator         |           | 0.655    | bias | 1.37E-03 | BLNK, FLT3, GAT3, GJB2, IL7R, ZC3H12A                                   | 30 (2)   |
| chloro arsenite                                         |       | chemical drug                   |           | 1.400    | bias | 1.37E-03 | CEBPA, FTH1, GAD45H, HK2, JUN, LITAF                                    | 187 (18) |
| TFAP2A                                                  |       | transcription regulator         |           | 1.623    | bias | 1.37E-03 | ALCAM, BIRC3, CEPBA, KLF4, PLAGL1, RAB27B, SERPINE1, SOD2               | 195 (16) |
| INSIG1                                                  |       | other                           | Inhibited | -2.828   | bias | 1.37E-03 | CD8, CCR7, CD86, CLEC4D, FABP5, HMGC2, MRC1, NQO2                       |          |
| BRCA1                                                   |       | transcription regulator         | Activated | 2.319    | bias | 1.37E-03 | CD24a, FAS, GAD64S6, GDF15, HSPB1, KLF3, NEK2, NQO1, PERP, SERPINE2     | 198 (17) |
| zuribone                                                |       | chemical - endogenous non-mar   |           | -0.832   | bias | 1.39E-03 | BCL2A1, BIRC3, CASP3, ICAM1                                             | 101 (10) |
| TRIM1 (complex)                                         |       | complex                         |           |          |      | 1.39E-03 | CD86, CD86, ICAM1, SERPINE1                                             |          |
| TRPS1                                                   |       | transcription regulator         |           | 0.152    | bias | 1.39E-03 | ENPP1, GALNT3, RUNX2, SERPING1                                          |          |
| MAP3K3                                                  |       | kinase                          |           |          |      | 1.39E-03 | BMP2, JUN, STEAP4, TNFAIP3                                              | 150 (17) |
| CLDN6                                                   |       | other                           |           |          |      | 1.39E-03 | CLDN10, CLDN4, KLF4, TMG3                                               |          |
| TRPV4                                                   |       | ion channel                     | Activated | 2.000    | bias | 1.39E-03 | Cc2, CD8, FAS, Saa3                                                     | 113 (7)  |
| IL-290157                                               |       | chemical reagent                |           | 2.000    | bias | 1.39E-03 | BMP4, CD40, CD86, IL1B                                                  | 176 (13) |
| GLI1                                                    |       | transcription regulator         | Activated | 2.527    | bias | 1.40E-03 | BCL2A1, Cc2, C24a, CSF1, FAS, JUP, KLF4, KLF3, KRT19, MEST              | 139 (7)  |
| 4-hydroxytamoxifen                                      |       | chemical drug                   | Activated | 2.359    | bias | 1.44E-03 | CDCA7, CEPBA, CEPBD, CLDN4, IL7R, JUN, KRT19, NFKBIA, RND1, TM4SF1      | 215 (22) |
| 2,LL-CHO                                                |       | chemical - protease inhibitor   |           | 1.791    | bias | 1.44E-03 | BIRC3, Cc2, CEPBA, DMD, FAS, GSTP1, HSPB1, ICAM1, IL1B, JUN             | 217 (22) |
| TRAF3                                                   |       | transcription regulator         |           | 1.925    | bias | 1.46E-03 | Cc2, CEPBA, GAT3, Hamp/Tamp2, PRKGI, SERPINE1, TNFAIP3                  |          |
| NCOA3                                                   |       | transcription regulator         | Activated | 2.592    | bias | 1.46E-03 | CNNA2, CEPBA, GJB2, HK2, Muc1, NFKBIA, XDH                              | 151 (11) |
| KLF6                                                    | 1.036 | transcription regulator         |           | 1.503    | bias | 1.46E-03 | Cc2, IL1B, MRC1, NFKBIA, SDC1, TNFAIP3, TNIP1                           | 154 (16) |
| PRNP                                                    |       | other                           |           | 0.059    | bias | 1.46E-03 | CASP3, CD44, FOSL1, HSPB1, IL1B, LRP1, NFKBIA                           | 212 (20) |
| STAT2                                                   |       | transcription regulator         |           | 0.980    | bias | 1.46E-03 | Cc2, CD40, CD86, GBP6, Irf1, IRF5                                       | 137 (10) |
| PTGIR                                                   |       | transcription regulator         |           | -1.706   | bias | 1.46E-03 | BLNK, Cc2, CD14, CD86, NFKBIA, ZNF703                                   |          |
| diphenyleneiodonium                                     |       | chemical reagent                | Inhibited | -2.400   | bias | 1.49E-03 | BMP2, Cc2, CLDN4, IL1B, SERPINE1, SOD2                                  | 189 (18) |
| DICER1                                                  |       | enzyme                          | Inhibited | -2.621   | bias | 1.49E-03 | CASP3, CD44, CD86, DEPP1, ICAM1, ID3, IL1B, IL7R, JUN, RASGRP1          | 210 (22) |
| CDKN2A                                                  |       | transcription regulator         |           | -0.432   | bias | 1.49E-03 | BTG3, CASP3, Cc2, Cc2, CNNA2, CCR7, CEPBD, CXCL14, DONSON, IL1B         | 226 (22) |
| TRIM1                                                   |       | enzyme                          |           | 1.571    | bias | 1.52E-03 | BIRC3, CD83, CD86, HK1, IL1B, NFKBIA, RUNX2, SDC1, SOD2, SERPINE1       | 215 (17) |
| RNASEH2A                                                |       | enzyme                          |           |          |      | 1.52E-03 | IFI16, IFNGR2, IRF5, NFkBIA, OASL                                       |          |
| TLR7/8                                                  |       | group                           | Activated | 2.000    | bias | 1.52E-03 | BCL2A1, NFKBIA, NFKBIZ, PNR1, TNFAIP3                                   | 107 (7)  |
| TNFSF12                                                 |       | cytokine                        |           | 2.747    | bias | 1.55E-03 | BST1, Cc2, CD86, CLEC4D, ICAM1, IL1B, NFKBIA, TNFRSF12A                 | 174 (17) |
| PTGER2                                                  |       | G-protein coupled receptor      |           | 1.725    | bias | 1.55E-03 | CNNA2, CCR7, CLEC4D, ESD, IL1B, IL36G, NEK2, SERPINE1                   | 157 (17) |
| TNFRSF18                                                |       | transmembrane receptor          |           | 0.816    | bias | 1.63E-03 | CCR7, FAS, IFI16, C2, RELB, VCL                                         |          |
| NODAL                                                   |       | growth factor                   |           | -1.000   | bias | 1.63E-03 | CCR7, CD40, CD86, MRC1                                                  | 94 (7)   |
| SLPI                                                    |       | other                           |           | -0.762   | bias | 1.63E-03 | CD40, CD86, ICAM1, NFKBIA                                               | 126 (16) |
| NFKBIZ                                                  | 0.499 | transcription regulator         |           | 1.960    | bias | 1.63E-03 | Cc2, CEPBD, CSF3, IL36G                                                 | 189 (12) |
| HSPD1                                                   |       | enzyme                          |           | 1.969    | bias | 1.63E-03 | Cc2, GAT3, ICAM1, IL1B                                                  | 156 (19) |
| chalconoxin A                                           |       | chemical toxicant               |           |          |      | 1.63E-03 | CASP3, FAS, GSTP1, NQO1                                                 |          |
| IRS1                                                    |       | enzyme                          |           | 1.054    | bias | 1.66E-03 | BMP6, BUB1, CEPBA, CEPBD, GAT3, KLF4, NFKBIA, RHO, Tcf7                 | 173 (12) |
| chlorpromazine                                          |       | chemical drug                   |           | -0.555   | bias | 1.69E-03 | CD83, DEPP1, HPN, IL1B, SL, C2A3                                        |          |
| azithromycin                                            |       | chemical drug                   |           |          |      | 1.69E-03 | Cc2, IL1B                                                               |          |

|                                     |       |                                 |           |        |          |                                                                                               |          |
|-------------------------------------|-------|---------------------------------|-----------|--------|----------|-----------------------------------------------------------------------------------------------|----------|
| SR 144528                           |       | chemical reagent                |           |        | 1.69E-03 | ICAM1, IL1B, NFKBIA                                                                           | 187 (6)  |
| 5-fluorouracil                      |       | chemical drug                   | Activated | 2.031  | 1.70E-03 | CASP3, CD40, CD81, CD86, FAS, GAP43, GDF15, IL1B, JUN, RHBD2                                  | 207 (19) |
| 5-N-ethylcarboxamido adenosine      |       | chemical reagent                |           | -0.707 | 1.75E-03 | Cd2, CEBPD, CSF2RB, DUSP16, HK2, IL1B, KLF6, SERPINE1                                         | 177 (15) |
| TSG2                                |       | other                           | Inhibited | -2.355 | 1.75E-03 | Cd2, CD68, CP, GAP43, HK2, HMGCS2, HSPB1, RASSF4, SOD2                                        | 198 (19) |
| EGLN1                               |       | enzyme                          |           | 1.000  | 1.77E-03 | Cd2, CD86, Hamp/Hamp2, ICAM1, IL1B, SDC4                                                      | 196 (19) |
| RHO                                 |       | G-protein coupled receptor      |           | -0.447 | 1.77E-03 | CASP3, CD4, CEBPD, HK2, SERPINE1, TNFAIP3                                                     | 173 (19) |
| SIN3A                               |       | transcription regulator         |           |        | 1.77E-03 | CASP3, GADD45B, GSTP1, KLF6, KLF3, SERPINE1                                                   | 162 (11) |
| IRF1                                |       | transcription regulator         | Activated | 3.056  | 1.79E-03 | CTR, CASP3, CD40, CXCL16, IRF47, IL1B, IRF5, OASL, PLA2G16, PSMB10                            | 168 (16) |
| CDH1                                |       | other                           |           | 0.051  | 1.80E-03 | BMP4, CD44, FOSL1, JUN, JUP, KRT19, RALA                                                      | 213 (22) |
| CFTR                                |       | ion channel                     |           | -0.896 | 1.80E-03 | BLNK, CTR, FAS, NFKBIA, NFKB1, Saa3, TNFAIP3                                                  | 173 (19) |
| phytohemagglutinin                  |       | chemical drug                   | Activated | 2.720  | 1.81E-03 | ALDH2, CASP3, CCR7, CD44, CD83, CSF1, CXCL12, FAS, GATA3, ICAM1                               | 135 (7)  |
| CD24                                |       | other                           |           |        | 1.85E-03 | APOBEC3B, GDF15, ICAM1, JUN, OASL, RELB, SLC30A1, SLC4A4                                      | 148 (17) |
| ACKR2                               |       | G-protein coupled receptor      | Inhibited | -2.236 | 1.88E-03 | ACOD1, IFI16, IRF47, IL1B, OASL                                                               | 148 (17) |
| D-galactosamine                     |       | chemical - endogenous mammal    | Activated | 2.219  | 1.88E-03 | CD14, GDF15, ICAM1, JUN, SOD2                                                                 | 111 (7)  |
| TIFA6                               |       | transcription regulator         |           |        | 1.90E-03 | JUN, NFKBIA, TNFAIP3, ZBTB16                                                                  | 175 (18) |
| OSMR                                |       | transmembrane receptor          |           | 1.969  | 1.92E-03 | BIRC3, Cd2, GAP43, IRF47, IL6ST, Serpina3g (includes others)                                  | 175 (18) |
| USF2                                |       | transcription regulator         |           |        | 1.92E-03 | CD2, GATA3, Hamp/Hamp2, KLF3, PRKG1, SERPINE1                                                 | 116 (9)  |
| HDAC4                               |       | transcription regulator         |           |        | 2.04E-03 | DMD, FOSL1, HOMER2, JUN, RAB3C, RTN1, RUNX2, SYN2, TNFRSF12A                                  | 106 (11) |
| LCN2                                |       | transporter                     |           | 0.163  | 2.06E-03 | BMP2, Cd2, Cc8, IL1B, MRC1, RUNX2, TINAG1                                                     | 150 (18) |
| amphetamine                         |       | chemical drug                   |           | 1.050  | 2.06E-03 | BMP4, BUB1, FOSL1, GRM6, ICAM1, JUN, TNFAIP3                                                  | 150 (18) |
| ATP                                 |       | chemical - endogenous mammal    | Activated | 2.515  | 2.08E-03 | Cd2, CCR7, CD14, CD83, CD86, ICAM1, IL1B, SERPINE1                                            | 151 (7)  |
| EGLN                                |       | group                           | Inhibited | -3.109 | 2.09E-03 | CAVIN1, Cd2, FTL, GATA3, Hamp/Hamp2, HK2, RNASE4, Serpina3g (includes others), SERPINE1, STC2 | 134 (16) |
| resatorvid                          |       | chemical drug                   |           |        | 2.17E-03 | APOBEC3B, Cd2, IL1B                                                                           |          |
| peroxivine                          |       | chemical drug                   |           |        | 2.17E-03 | DEP1, HNF1, SL, CD2A3                                                                         |          |
| LILRA2                              |       | other                           |           |        | 2.17E-03 | CD40, CSF3, MRC1                                                                              |          |
| ERFE                                |       | other                           |           |        | 2.17E-03 | ATOH8, Hamp/Hamp2, ID1                                                                        |          |
| mi-373                              |       | microRNA                        |           |        | 2.17E-03 | CD4, LATS2, SERPINE1                                                                          |          |
| FSTL1                               |       | other                           |           |        | 2.17E-03 | Cd2, GDF15, IL1B                                                                              |          |
| ATXN3                               |       | peptidase                       |           |        | 2.17E-03 | CXCL12, IL1RL1, SOD2                                                                          | 146 (16) |
| KRT8                                | 0.955 | other                           |           |        | 2.17E-03 | KRT19, KRT20, Reg3d                                                                           |          |
| CCL3L3                              |       | cytokine                        |           |        | 2.17E-03 | Cd2, CD40, IL1B                                                                               | 135 (13) |
| SIRP4                               |       | phosphatase                     |           |        | 2.17E-03 | Cd2, CSF3, IL1B                                                                               | 150 (17) |
| hydroquinone                        |       | chemical - endogenous mammal    |           |        | 2.17E-03 | IL1B, JUN, SFR1                                                                               | 146 (16) |
| MRTFA                               |       | transcription regulator         |           | 0.946  | 2.19E-03 | CXCL12, CYBA, F11R, HLA-A, ICAM1, ID1, RAB27B, Saa3, TST, VCL                                 | 29 (3)   |
| UTP                                 |       | chemical - endogenous mammal    |           |        | 2.19E-03 | Cd2, CD14, ICAM1, SERPINE1                                                                    | 161 (18) |
| PROCR                               |       | other                           |           | -0.747 | 2.19E-03 | Cd2, G8P6, ICAM1, IL1B                                                                        | 169 (19) |
| SCAP31                              |       | transporter                     |           | -0.152 | 2.19E-03 | Cd2, CD81, CD8, IL1B                                                                          |          |
| BGN                                 |       | other                           |           | 0.862  | 2.19E-03 | BMP2, IL1B, RUNX2, SERPINE1                                                                   | 220 (22) |
| Saa3                                | 1.778 | other                           |           |        | 2.19E-03 | APOA1, BMP2, CSF3, RUNX2                                                                      |          |
| SLC9A3                              |       | ion channel                     |           |        | 2.19E-03 | IRF47, Reg3d, Saa3, Upp1                                                                      |          |
| BMPR1B                              |       | kinase                          |           | 1.969  | 2.19E-03 | ID1, ID3, RUNX2, SERPINE1                                                                     | 176 (17) |
| disulfide                           |       | chemical - endogenous non-mar   |           | 1.980  | 2.19E-03 | CASP3, GDF15, GSTA3, NQO1                                                                     |          |
| ceramide                            |       | chemical - endogenous mammal    |           | 1.091  | 2.19E-03 | CASP3, ICAM1, IL1B, JUN                                                                       | 199 (21) |
| NCOA2                               |       | transcription regulator         |           | 0.964  | 2.20E-03 | BMP2, Cd2, CEBPA, IL1B, KLF3, KRT19, NFKBIA, OASL                                             | 166 (18) |
| arsenite                            |       | chemical toxicant               |           |        | 2.20E-03 | ESD, GSTP1, Hspa15, HSPB1, JUN, NQO1, PRKG1, SERPINE1                                         | 217 (22) |
| FOX42                               |       | transcription regulator         |           | 1.668  | 2.24E-03 | ALAS1, APOA1, C8a, CEBPA, CLCA1, CLDN6, EPHD2, FABP5, GPRC5C, HK2                             | 144 (18) |
| Rx-21                               |       | microRNA                        | Inhibited | -3.219 | 2.25E-03 | CASP3, CDNA2, FAS, GATA3, G8P6, Shp8, ICAM1, IFI16, IL1B, IL26                                | 184 (19) |
| FOXJ2                               |       | transcription regulator         | Activated | 2.429  | 2.26E-03 | BCL2A1, BMP2, FAS, ICAM1, SOD2, TNFAIP3                                                       |          |
| BCL2L1                              |       | other                           |           | -0.928 | 2.26E-03 | CASP3, Cd2, CD44, FAS, IL1B, NQO1                                                             | 160 (18) |
| QASR                                |       | G-protein coupled receptor      |           | 1.667  | 2.26E-03 | ARHGEP3, CD44, Clec4d (includes others), CSF1, GATA3, ID1, ITGB7, VCL, ZYX                    | 132 (7)  |
| TIR8                                |       | transmembrane receptor          | Activated | 3.219  | 2.31E-03 | Cd2, Cc8, CD40, CD86, CSF1, CSF3, CXCL12, IL1B                                                | 180 (20) |
| A2M                                 |       | transcription regulator         |           | 0.372  | 2.31E-03 | Cd2, GADD45B, GAP43, IL1B, LRP1                                                               | 151 (15) |
| IFNGR1                              |       | transmembrane receptor          |           | 1.686  | 2.31E-03 | Cd2, CXCL12, FAS, ICAM1, IL1B                                                                 | 150 (15) |
| NLRP3                               |       | other                           |           | 0.840  | 2.35E-03 | Cd2, CSF3, CXCR3, GATA3, IL1B, MRC1, RELB                                                     | 183 (18) |
| bexarotene                          |       | chemical drug                   |           | 1.411  | 2.40E-03 | ALCAM, BMP6, Cd2, DEP1, DHR33, ICAM1, ID1, IL1B, Nes, Pnrc1                                   | 193 (18) |
| cytarabine                          |       | chemical drug                   | Activated | 2.431  | 2.44E-03 | CD40, CD86, FAS, HLA-A, ICAM1, IL1B                                                           | 168 (18) |
| black raspberry extract             |       | chemical drug                   |           |        | 2.46E-03 | AKR1B10, BUB1, CD44, KRT20, LAMB3, PLS3, SDC1, SLC30A1                                        |          |
| RET                                 |       | kinase                          | Activated | 2.425  | 2.46E-03 | Cd2, CSF1, CSF3, CXCL12, IL1B, KLF3, PTPN13, SCAR3A                                           | 181 (17) |
| CCR2                                |       | G-protein coupled receptor      | Activated | 2.743  | 2.46E-03 | Cd2, Cc8, CD40, CD86, CSF1, CSF3, CXCL12, IL1B                                                | 184 (19) |
| BIR4                                |       | kinase                          | Activated | 2.000  | 2.49E-03 | CNA2, CEBPA, ICAM1, IL1RL1, CX, MAL, NQO1, NQO1, STC2                                         | 131 (13) |
| RORA                                |       | ligand-dependent nuclear recept |           | 1.609  | 2.49E-03 | Ca1t, Cd2, Cc8, CLCA1, GADD45B, GSTP1, IL1B, LPIN2, NFKBIA, SLC2A3                            | 97 (7)   |
| aluminum hydroxide                  |       | chemical drug                   |           |        | 2.50E-03 | Glycam1, ICAM1                                                                                | 137 (11) |
| LY75                                | 1.199 | transmembrane receptor          |           |        | 2.50E-03 | CD40, CD86                                                                                    |          |
| B3GN2                               |       | enzyme                          |           |        | 2.50E-03 | CD14, IL1B                                                                                    |          |
| CYP2C8                              |       | enzyme                          |           |        | 2.50E-03 | Cd2, IL1B                                                                                     |          |
| SIRT4                               |       | enzyme                          |           |        | 2.50E-03 | Cd2, IL1B                                                                                     |          |
| Casein                              |       | group                           |           |        | 2.50E-03 | ICAM1, IL1B                                                                                   |          |
| serotonic acid                      |       | chemical - endogenous mammal    |           |        | 2.50E-03 | CD40, IL1B                                                                                    |          |
| RNF5                                |       | transcription regulator         |           |        | 2.50E-03 | BMF, KLF3                                                                                     | 136 (7)  |
| TAOK2                               |       | kinase                          |           |        | 2.50E-03 | GSTP1, SOD2                                                                                   |          |
| miR-328-3p (and other miRNAs)       |       | mature microRNA                 |           |        | 2.50E-03 | CD44, CEBPA                                                                                   |          |
| EGFL7                               |       | other                           |           |        | 2.50E-03 | ICAM1, NFKBIA                                                                                 |          |
| FBXL5                               |       | enzyme                          |           |        | 2.50E-03 | FTTH, SLC11A2                                                                                 |          |
| PTG2                                |       | transmembrane receptor          |           |        | 2.50E-03 | CXCL12, JAG1                                                                                  |          |
| CFL1                                |       | other                           |           |        | 2.50E-03 | ICAM1, JUN                                                                                    | 122 (12) |
| M3                                  |       | other                           |           |        | 2.50E-03 | CEBPD, GSTP1                                                                                  |          |
| DEETGE-CAL-Tat                      |       | chemical reagent                |           |        | 2.50E-03 | NQO1, SOD2                                                                                    |          |
| ascornycin                          |       | chemical reagent                |           |        | 2.50E-03 | CD83, CD86                                                                                    |          |
| phenanthridine                      |       | chemical toxicant               |           |        | 2.50E-03 | CD83, CD86                                                                                    |          |
| sucniylacetone                      |       | chemical - endogenous mammal    |           |        | 2.50E-03 | ALA51, CYBA                                                                                   |          |
| MAX                                 |       | transcription regulator         |           | -0.128 | 2.51E-03 | FTTH, GADD45B, HK2, HMG1, ID1, KLF6, SLC2A3                                                   | 181 (17) |
| COL18A1                             |       | other                           | Inhibited | -2.621 | 2.51E-03 | ANTXR1, HK2, ICAM1, ID1, ID3, JUN, SERPINE1                                                   |          |
| TLG1A                               |       | transcription regulator         |           |        | 2.51E-03 | ACOD1, CD86, GLEAD, GDF15, IL1B, LY93, STEAP4                                                 |          |
| choline fenofibrate                 |       | chemical drug                   |           | -0.218 | 2.51E-03 | CXCL12, NFKBIA, SERPINE1, UGT1A7 (includes others)                                            | 111 (7)  |
| CX3CR1                              |       | G-protein coupled receptor      |           | 0.000  | 2.51E-03 | Cd2, CD14, ICAM1, IL1B                                                                        | 160 (17) |
| RC3H1                               |       | enzyme                          |           |        | 2.51E-03 | CCR7, IL1B, IL6ST, SDC1                                                                       |          |
| MALP-2a                             |       | chemical reagent                | Activated | 2.000  | 2.51E-03 | BCL2A1, CD40, CD86, IL1B                                                                      | 194 (21) |
| SNCA                                |       | complex                         | Activated | 2.207  | 2.55E-03 | CASP3, Cd2, CD86, CD8L, DHR33, HOMER2, Hspa15, IRF47, IL1B, PTK2B                             | 201 (18) |
| VitaminD3-VDR-RXR                   |       | transcription regulator         |           | 0.152  | 2.55E-03 | CD14, IL1RL1, KLF4, SEMA3B, SERPINE1                                                          |          |
| MYB12                               |       | transcription regulator         |           | 1.432  | 2.55E-03 | BIRC3, BUB1, CNA2, CEBPA, ID1                                                                 | 174 (18) |
| SPHK1                               |       | kinase                          |           | 1.091  | 2.55E-03 | BIRC3, Cd2, IL1B, JUN, SERPINE1                                                               | 160 (16) |
| IL12A                               |       | cytokine                        |           | 1.467  | 2.55E-03 | CASP3, CD86, FAS, ICAM1, IL1B                                                                 | 170 (20) |
| vincristine                         |       | chemical drug                   |           | 2.219  | 2.55E-03 | FAS, GAP43, IL1B, JUN, SOD2                                                                   | 176 (14) |
| D-fructose                          |       | chemical - endogenous mammal    | Activated | -1.066 | 2.59E-03 | Cd2, CD86, CEBPA, ICAM1, IL1B                                                                 | 131 (12) |
| TAL1                                |       | transcription regulator         |           | 0.426  | 2.61E-03 | BUB1, DOKK1, GATA3, HLA-A, ICAM1, JUN, MEST, NFKB1, PTK2B, SLC2A3                             | 244 (22) |
| Hdac                                |       | group                           |           | 2.389  | 2.63E-03 | BMP2, BMP2, CD44, GATA3, PRKG1, RND3, RUNX2                                                   | 146 (9)  |
| DKK1                                |       | growth factor                   | Inhibited | -1.347 | 2.67E-03 | GDF15, ICAM1, IL1B, JUN, PRKG1, RND3, RUNX2                                                   | 203 (21) |
| RHOA                                |       | enzyme                          |           | -0.292 | 2.71E-03 | BLNK, BMP2, CASP3, CNA2, CEBPA, CXCL12, ID1, IL1B, LYN, MAPK4                                 | 222 (23) |
| matinib                             |       | group                           |           |        | 2.72E-03 | CAVIN1, CD44, IL1B                                                                            |          |
| Actin                               |       | phosphatase                     |           |        | 2.72E-03 | Cd2, CEBPD, CXCL14                                                                            |          |
| Ptprb                               |       | phosphatase                     |           |        | 2.72E-03 | Cd2, ICAM1, IL1B                                                                              | 152 (15) |
| N2-(gamma-D-glutamyl)-meso-elastase |       | chemical reagent                |           |        | 2.72E-03 | ICAM1, IL1B, MLKL                                                                             | 133 (15) |
| PSMB10                              | 0.446 | peptidase                       |           |        | 2.72E-03 | GATA3, NFKBIA, TNFAIP3                                                                        | 85 (7)   |
| Betacatenin/TCF                     |       | complex                         |           |        | 2.72E-03 | CD44, JUN, RUNX2                                                                              | 160 (11) |
| ACE2                                |       | peptidase                       |           |        | 2.72E-03 | Cd2, IL1B, SERPINE1                                                                           | 192 (18) |
| Hsp27                               |       | group                           |           | 0.000  | 2.80E-03 | CASP3, CD14, CD86, CSF1, KLF3                                                                 |          |
| LRP6                                |       | transmembrane receptor          |           | -0.176 | 2.80E-03 | CD86, GATA3, HK2, IL1B, SLC2A3                                                                | 118 (10) |
| ADORA1B                             |       | G-protein coupled receptor      |           |        | 2.80E-03 | CEBPD, FABP4, IL6ST, JUN, RALA                                                                | 123 (9)  |
| LTG7                                |       | transcription regulator         |           |        | 2.80E-03 | CEBPA, CEBPD, GATA3, LCK, Tcf7                                                                | 179 (20) |
| Igm                                 |       | complex                         |           | -1.119 | 2.84E-03 | BCL2A1, CNA2, CD40, CD44, FAS, ID3                                                            | 100 (9)  |
| SPDEF                               |       | transcription regulator         |           |        | 2.84E-03 | BIRC3, CD40, KLF3, LASP1, SDC1, SERPINE1                                                      | 137 (7)  |
| RASSF1                              |       | other                           |           | 0.626  | 2.85E-03 | AMIGO2, CASP3, CAV2, CNA2, GDF15, KLF4, LITAF                                                 | 89 (8)   |
| SAMSN1                              |       | other                           | Activated | 2.646  | 2.85E-03 | BATF, CD40, NFKBIA, OASL, SDC1, Vmn3, ZC3H12A                                                 | 164 (18) |
| CLEC7A                              |       | transmembrane receptor          |           | 1.940  | 2.87E-03 | CCR7, CLCA1, CSF3, IL1B                                                                       | 205 (20) |
| B2M                                 |       | transmembrane receptor          |           | 0.152  | 2.87E-03 | CD8A, Hamp/Hamp2, HLA-A, IL1B                                                                 | 204 (17) |
| FCGR2A                              |       | transmembrane receptor          |           | 1.992  | 2.87E-03 | Cd2, FAS, IL1B, SERPINE1                                                                      | 150 (18) |
| olipraz                             |       | chemical drug                   |           | 1.961  | 2.87E-03 | FTTH, GSTP1, NQO1, UGT1A7 (includes others)                                                   | 81 (7)   |
| methylxanthinosoguanidine           |       | chemical toxicant               |           | 1.990  | 2.87E-03 | CEBPA, FAS, GDF15, SERPINE1                                                                   | 154 (18) |
| suramin                             |       | chemical drug                   |           | -0.911 | 2.87E-03 | Cd2, CD40, CD86, ICAM1                                                                        | 150 (18) |
| dicarbethoxydihydrocolidine         |       | chemical toxicant               |           |        | 2.87E-03 | Cd2, CNA2, IL1B, KRT19                                                                        | 154 (18) |
| hemozoin                            |       | chemical - endogenous non-mar   |           | 1.921  | 2.87E-03 | Cd2, CD83, ICAM1, IL1B                                                                        | 146 (16) |
| CyD ODN 2006                        |       | chemical reagent                | Activated | 2.507  | 2.91E-03 | BIRC3, CD40, CD86, ICAM1, IL1B, NFKB1, OASL                                                   | 184 (20) |
| MIF                                 |       | cytokine                        | Activated | 2.742  | 3.05E-03 | Cd2, CD44, CXCL16, ICAM1, IL1B, IL6ST, IL7R, JUN                                              | 136 (7)  |
| paraquat                            |       | chemical toxicant               |           | 1.916  | 3.05E-03 | APOA1, CEBPD, FAS, GSTA3, GSTP1, KLF6, LAMC2, LPIN2                                           | 143 (16) |
| C3                                  |       | peptidase                       |           | 1.378  | 3.06E-03 | CASP3, Cd2, CSF1, CXCL16, IL1B, JUN                                                           | 204 (21) |
| MYRF                                |       | transcription regulator         |           | 0.000  | 3.06E-03 | ANKA6, GDF15, HPDGS, NPSD1, RHOU                                                              | 175 (18) |
| PRKD1                               |       | kinase                          | Activated | 2.080  | 3.08E-03 | Cd2, CD2, CD86, IL1B, TNFAIP3                                                                 | 154 (16) |
| valsartan                           |       | chemical drug                   | Inhibited | -2.202 | 3.09E-03 | Cd2, CYBA, ICAM1, IL1B, SERPINE1                                                              | 175 (18) |
| PTH                                 |       | group                           | Activated | 2.296  | 3.09E-03 | BMP2, Cd2, CSF1, CXCL12, CYBA, GALNT3, JUN, RUNX2, Saa3, SDC4                                 | 176 (16) |
| EN1                                 |       | cytokine                        | Activated | 2.748  | 3.15E-03 | ADAM19, ANKX6, BCL2A1, CCR7, FOSL1, ICAM1, JUN, P, Q84, SDC1, SERPINE1                        | 173 (18) |
| IRN Beta                            |       | group                           |           | 1.445  | 3.16E-03 | ACOD1, CCR7, CD40, CD83, CD86, HLA-A, IFI16, IL1B, OASL                                       | 201 (20) |
| mi-155                              |       | microRNA                        |           | -0.684 | 3.22E-03 | CD86, CEBPA, CSF3, DOKK1, HK2, IL1B, IRAK3, SERPINE1                                          |          |
| HNF1B                               |       | transcription regulator         |           | 0.816  | 3.22E-03 | CD44, F11R, ID1, ID3, JAG1, RNASE4, UGT1A7 (includes others), UPP1                            | 151 (9)  |
| RPSA                                |       | translation regulator           | Inhibited | -2.000 | 3.26E-03 | CSF3, IRF47, IL1B, RELB                                                                       |          |
| miR-221-3p (and other miRNAs)       |       | mature microRNA                 |           | -1.994 | 3.26E-03 | BMF, ICAM1, KLF3, SOD2                                                                        |          |
| VAV3                                |       | cytokine                        |           |        | 3.26E-03 | BCL2A1, CAV2, KLF3, RALA                                                                      |          |
| CDK5                                |       | kinase                          |           | 1.929  | 3.26E-03 | CD14, JUN, RALA, TNFAIP3                                                                      | 113 (10) |
| NFATC3                              |       | transcription regulator         |           | -0.254 | 3.29E-03 | B3GAT1, BMP2, CASP3, GAP43, JUN, PRKD3                                                        | 164 (17) |
| 2-deoxyglucose                      |       | chemical drug                   |           | 0.056  | 3.29E-03 | BMF, CASP3, Cd2, IL1B, JUN, SOD2                                                              | 209 (17) |
| AKT1                                |       | kinase                          | Activated | 2.751  | 3.29E-03 | AKT1B10, BCL2A1, BIRC3, BMP2, CASP3, Cc8, CD40, CD86, CEBPD, FABP5                            | 155 (20) |
| monophosphoryl lipid A              |       | chemical drug                   |           |        | 3.34E-03 | Cd2, CD86, IL1B                                                                               |          |
| 1'-acetoxycyclool acetate           |       | chemical reagent                |           |        | 3.34E-03 | BCL2A1, BIRC3, ICAM1                                                                          | 118 (12) |
| TIFA                                |       | other                           |           |        | 3.34E-03 | ICAM1, NFKBIA, TNFAIP3                                                                        | 126 (15) |
| NSD1                                |       | transcription regulator         |           |        | 3.34E-03 | BMP4, IRAK3, KLF6                                                                             | 155 (17) |
| TRAF5                               |       | transporter                     |           |        | 3.34E-03 | CD86, FAS, ICAM1                                                                              | 104 (7)  |
| TNFSF9                              |       | cytokine                        |           |        | 3.34E-03 | CCR7, CD14, ICAM1                                                                             | 105 (7)  |
| Z-551                               |       | chemical reagent                |           |        | 3.34E-03 | Cd2, CD86, IL1B                                                                               |          |

|                                 |       |                                |           |        |      |          |                                                                           |          |  |
|---------------------------------|-------|--------------------------------|-----------|--------|------|----------|---------------------------------------------------------------------------|----------|--|
| PDLIM2                          |       | other                          |           | -1.890 |      | 3.41E-03 | BST1,CRISPLD2,FBP1,RTN1,SCARA3,SLC43A3,STC2                               |          |  |
| mr-210                          |       | microRNA                       | Inhibited | -2.368 | bias | 3.41E-03 | CDH9,CXCL12,FGFR1,KLFB,LASP1,RADS52,SCARA3                                |          |  |
| FOXO4                           |       | transcription regulator        |           | 0.692  |      | 3.41E-03 | ANKX3,FABP5,GADD45B,JAG1,LCP2,SERPINE1,SOD2                               | 150 (7)  |  |
| ciprofibrate                    |       | chemical drug                  |           | 0.174  |      | 3.47E-03 | CXCL12,GSTP1,KRT8,MGLL,NFKBIA,OAT,Saa3,SLC4A4,Vnn3                        | 114 (8)  |  |
| L-tryptophan                    |       | chemical - endogenous mamma    |           | -0.730 | bias | 3.49E-03 | APOA1,BMP4,CAMK4,CD44,CEBPA,CXCL12,FAS,GDF15,HBPD,ID1                     | 190 (19) |  |
| LGAL5                           |       | other                          |           | 1.710  | bias | 3.53E-03 | ANG2,Cd2,CXCL16,IFNGR2,IL1B,SERPINE1                                      | 219 (23) |  |
| GW3965                          |       | chemical reagent               |           | -1.039 |      | 3.57E-03 | APOA1,Cd2,CNA2,CD86,CSF3,FABP5,IL1B,NFKBIA                                | 148 (12) |  |
| RPTOR                           |       | other                          |           | -0.136 | bias | 3.62E-03 | Cd2,CCR7,CD86,HK2,IL1B,LY75,MRC1                                          | 188 (21) |  |
| TRAP                            |       | other                          |           | 0.762  | bias | 3.68E-03 | CD40,CD86,ICAM1,IL1B                                                      | 148 (17) |  |
| VTN                             |       | other                          |           | 1.199  | bias | 3.68E-03 | IL1B,RUNX2,SERPINE1,SFN                                                   | 154 (20) |  |
| TAB1                            |       | enzyme                         |           | -0.702 | bias | 3.68E-03 | BIRC3,IL1B,JUN,SERPINE1                                                   | 143 (8)  |  |
| butylated hydroxyanisole        |       | chemical toxicant              |           | 1.896  | bias | 3.68E-03 | GSTA3,GSTP1,JUN,NQO1                                                      | 46 (3)   |  |
| selenium                        |       | chemical drug                  |           | -0.152 |      | 3.68E-03 | APOA1,CEBPA,KLK3,MRC1                                                     | 114 (7)  |  |
| Hedgehog                        |       | group                          |           |        |      | 3.68E-03 | CNA2,JAG1,KLF4,KLK3,KRT19                                                 |          |  |
| silylic acid                    |       | chemical drug                  |           | -1.000 | bias | 3.68E-03 | APOA1,CSF1,CSF3,GDF15,IL1B                                                | 161 (20) |  |
| AMPK                            |       | complex                        |           | 1.195  |      | 3.75E-03 | BMP2,BMP2,Cd2,CXCL12,LITAF,OAT,RUNX2,SERPINE1                             | 202 (21) |  |
| 3M402                           |       | chemical reagent               | Activated | 2.204  |      | 3.75E-03 | ACOD1,BCL2A1,CD40,CD83,CD86,FOSL1,IL1B,Saa3                               | 140 (15) |  |
| staurosporine                   |       | chemical - kinase inhibitor    |           | -1.238 |      | 3.75E-03 | CASP3,CD28,FAS,FOSL1,ICAM1,IL1B,NQO1,SERPINE1                             | 169 (20) |  |
| flutamin                        |       | chemical drug                  | Activated | 2.412  | bias | 3.79E-03 | ALAS1,CD14,CSF1,CYP3A7,GSTP1,IL1B,PDGFR,SERPINE1,UGT1A7 (includes others) | 26 (4)   |  |
| H99                             |       | chemical - kinase inhibitor    |           | -1.795 | bias | 3.79E-03 | Cd2,CD14,CD83,GSTP1,IL1B,NFKBIA,SDC1,SERPINE1,SOD2                        | 209 (16) |  |
| daidzein                        |       | chemical drug                  |           | 0.816  | bias | 3.84E-03 | CASP3,CD86,CXCR3,HLA-A,LCP2,NQO1,RASGRP1                                  | 169 (17) |  |
| ARNT                            |       | transcription regulator        |           | 0.277  | bias | 3.95E-03 | CCR7,CD81,CSF3,CXCR3,HK2,NQO1,SERPINE1,SLC2A3                             | 182 (13) |  |
| vorinostat                      |       | chemical drug                  |           | -1.356 |      | 3.99E-03 | BIRC3,BMP,CSF3,CD86,CEBPA,FAS,ICAM1,IL1B,JUN,KLF4                         | 204 (18) |  |
| 9,10-dimethyl-1,2-benzanthrac   |       | chemical toxicant              |           |        |      | 4.02E-03 | IL1B,JUN,MRC1,NQO1,SERPINE1                                               | 182 (20) |  |
| beta-naphthoflavone             |       | chemical toxicant              |           | 1.350  | bias | 4.02E-03 | FTH1,GSTP1,NQO1,Saa3,UGT1A7 (includes others)                             | 208 (17) |  |
| HDAC5                           |       | transcription regulator        |           |        |      | 4.05E-03 | HK2,HMGCS2,JUN,KLF6,PTPN13,RUNX2                                          |          |  |
| AGER                            |       | transmembrane receptor         |           | 1.449  | bias | 4.05E-03 | Cd2,CSF1,FAS,ICAM1,IL1B,SERPINE1                                          | 186 (21) |  |
| SHARPIN                         |       | other                          |           |        |      | 4.05E-03 | IL1B,M,K,L,TNFAIP3                                                        | 120 (14) |  |
| GA52L3                          |       | other                          |           |        |      | 4.05E-03 | FAS,PTPN14,TM6SF1                                                         |          |  |
| BMP10                           |       | growth factor                  |           |        |      | 4.05E-03 | ICAM1,ID1,NFKBIA                                                          | 149 (7)  |  |
| PRF1                            |       | transporter                    |           |        |      | 4.05E-03 | Cd2,CD44,IL1B                                                             | 137 (12) |  |
| MAFG                            |       | transcription regulator        |           |        |      | 4.05E-03 | GSTA3,GSTP1,NQO1                                                          |          |  |
| EPHX2                           |       | enzyme                         |           |        |      | 4.05E-03 | Cd2,ICAM1,IL1B                                                            | 190 (19) |  |
| MAPK10                          |       | kinase                         |           |        |      | 4.05E-03 | CASP3,CD44,JUN                                                            | 184 (17) |  |
| CXCL2                           |       | cytokine                       |           |        |      | 4.05E-03 | Cd2,ICAM1,IL1B                                                            | 182 (18) |  |
| VIPR1                           |       | G-protein coupled receptor     |           |        |      | 4.05E-03 | Cd2,CD40,CD86                                                             | 119 (13) |  |
| SMURF2                          |       | enzyme                         |           |        |      | 4.05E-03 | JUN,RUNX2,SERPINE1                                                        | 186 (17) |  |
| NAM1                            |       | transcription regulator        |           |        |      | 4.05E-03 | IL1B,IL7R,RND3                                                            | 66 (7)   |  |
| EFNB2                           |       | kinase                         |           |        |      | 4.05E-03 | IL7R,RUNX2,TIAM1                                                          |          |  |
| DSP                             |       | other                          |           |        |      | 4.05E-03 | Cd2,CEBPA,JUP                                                             |          |  |
| BHLHA15                         |       | transcription regulator        |           |        |      | 4.05E-03 | CKAR,GJ2,KRT19                                                            |          |  |
| cyclopiazonic acid              |       | chemical - endogenous non-ma   |           |        |      | 4.05E-03 | BCL2A1,Cd2,FAS                                                            | 86 (7)   |  |
| silicon dioxide                 |       | chemical drug                  |           |        |      | 4.05E-03 | FOSL1,IL1B,JUN                                                            | 208 (21) |  |
| erythromycin                    |       | chemical drug                  |           |        |      | 4.05E-03 | CD86,ICAM1,IL1B                                                           | 148 (17) |  |
| CDK19                           |       | kinase                         |           | -1.414 | bias | 4.07E-03 | CD81,FAS,JUN,RHBD2,SDC1,SFN,UPP1                                          |          |  |
| atorvastatin                    |       | chemical drug                  |           | -1.671 |      | 4.09E-03 | AP0A1,BMP2,BMP6,Cd2,CD40,CYBA,GADD45B,ICAM1,IL17RD,JUN                    | 204 (21) |  |
| p38 Sapk                        |       | group                          |           |        |      | 4.11E-03 | CD83,CD86                                                                 |          |  |
| Msi/Krs                         |       | group                          |           |        |      | 4.11E-03 | RELB,YAP1                                                                 |          |  |
| ATPase                          |       | group                          |           |        |      | 4.11E-03 | CD40,ICAM1                                                                |          |  |
| Em                              |       | group                          |           |        |      | 4.11E-03 | CD44,ICAM1                                                                |          |  |
| CYP                             |       | group                          |           |        |      | 4.11E-03 | CD86,NQO1                                                                 |          |  |
| olmesartan                      |       | chemical drug                  |           |        |      | 4.11E-03 | CYBA,ICAM1                                                                |          |  |
| FOXK2                           |       | transcription regulator        |           |        |      | 4.11E-03 | MCM3,SERPINE1                                                             |          |  |
| ZM22                            |       | transcription regulator        |           |        |      | 4.11E-03 | CD44,JUN                                                                  |          |  |
| Mucin                           |       | group                          |           |        |      | 4.11E-03 | CD83,CD86                                                                 |          |  |
| DCB 3503                        |       | chemical reagent               |           |        |      | 4.11E-03 | Cd2,IL1B                                                                  |          |  |
| TDP2                            |       | transcription regulator        |           |        |      | 4.11E-03 | KLK3,SYT1                                                                 |          |  |
| HADHA                           |       | enzyme                         |           |        |      | 4.11E-03 | Cd2,IL1B                                                                  | 95 (7)   |  |
| MAPKAPK5                        |       | kinase                         |           |        |      | 4.11E-03 | MAPK6,TNFAIP3                                                             |          |  |
| Om1 (includes others)           |       | other                          |           |        |      | 4.11E-03 | Cd2,IL1B                                                                  |          |  |
| EIF2AK1                         |       | kinase                         |           |        |      | 4.11E-03 | Hamp/Hamp2,IL1B                                                           |          |  |
| BCAR3                           |       | other                          |           |        |      | 4.11E-03 | RALA,RRAS                                                                 |          |  |
| CE51                            |       | enzyme                         |           |        |      | 4.11E-03 | Cd2,IL1B                                                                  |          |  |
| Cw33                            |       | cytokine                       |           |        |      | 4.11E-03 | CEBPA,CEBPD                                                               |          |  |
| ELF2                            |       | transcription regulator        |           |        |      | 4.11E-03 | KLK3,LYN                                                                  |          |  |
| 4,4'-disothiocyanostilbene-2,2' |       | chemical drug                  |           |        |      | 4.11E-03 | CASP3,Cd2                                                                 | 128 (13) |  |
| cimetidine                      |       | chemical drug                  |           |        |      | 4.11E-03 | FAS,GDF15                                                                 |          |  |
| cinnamyl-3,4-dihydroxy-alpha-c  |       | chemical reagent               |           |        |      | 4.11E-03 | Cd2,MRC1                                                                  |          |  |
| orantin                         |       | chemical drug                  |           |        |      | 4.11E-03 | CASP3,ICAM1                                                               |          |  |
| retinaldehyde                   |       | chemical - endogenous mamma    |           |        |      | 4.11E-03 | BMP2,CD44                                                                 |          |  |
| Stat3-Stat3                     |       | complex                        | Activated | 2.000  | bias | 4.14E-03 | FTL,ICAM1,JUN,SOD2                                                        | 144 (7)  |  |
| HOXC8                           |       | transcription regulator        |           | -1.000 | bias | 4.14E-03 | ADAM19,Cd2,KRT19,NQO1                                                     |          |  |
| SHH                             |       | peptidase                      |           | 1.133  | bias | 4.28E-03 | BMP2,BMP4,HK2,HMG2A1,ID1,LASP1,MCM3,RUNX2,SERPINE1,YAP1                   | 213 (26) |  |
| mr-199a-5p (and other mRNA      |       | mature microRNA                | Inhibited | -2.433 | bias | 4.33E-03 | CD31,ICL1,EL4,1,AMC2,RND1,ZBTB16                                          |          |  |
| methamphetamine                 |       | chemical drug                  | Activated | 2.407  | bias | 4.35E-03 | Cd2,FAS,HOMER2,ICAM1,IL1B,JUN                                             | 200 (18) |  |
| PELP1                           |       | other                          |           |        |      | 4.35E-03 | AHNAK2,BMP2,CSF3,GJB2,IL1B,KLK3,MAPK4,MRC1                                | 121 (7)  |  |
| QPER1                           |       | G-protein coupled receptor     | Activated | 2.236  | bias | 4.37E-03 | CEBPD,JUN,NFKBIA,RND1,TNFAIP3                                             | 259 (21) |  |
| enalapril                       |       | biologic drug                  |           |        |      | 4.37E-03 | CD44,CP,SERPINE1,SLC3A2,TNFRSF12A                                         |          |  |
| RB1                             |       | transcription regulator        |           | -0.473 |      | 4.41E-03 | BTG3,CASP3,CNA2,CEBPA,DONSON,FAS,FOSL1,GPRI75,GPRCSC,ID1                  | 215 (20) |  |
| Pdgfr (complex)                 |       | complex                        |           | 1.424  | bias | 4.55E-03 | Cd2,CD44,CYBA,ICAM1,JAG1,JUN,SERPINE1                                     | 197 (20) |  |
| NTRK2                           |       | kinase                         |           | 1.964  | bias | 4.63E-03 | BMP2,CNA2,JAG1,Muc1,SERPINE1,SYT1                                         | 97 (7)   |  |
| KDMA3                           |       | transcription regulator        |           | 1.962  | bias | 4.63E-03 | ALCAM,CD3,GDF15,SERPINE1                                                  |          |  |
| ARHGAP31                        |       | other                          |           | 0.000  |      | 4.63E-03 | BMP2,GADD45B,GDF15,JUN                                                    |          |  |
| SOST                            |       | enzyme                         |           | 1.980  | bias | 4.63E-03 | Cd2,CEBPA,IL1B,SOD2                                                       | 129 (12) |  |
| CYBB                            |       | other                          | Activated | 2.000  | bias | 4.63E-03 | Cd2,CYBA,ICAM1,IL1B                                                       | 195 (17) |  |
| IL17RA                          |       | transmembrane receptor         |           | 1.992  | bias | 4.63E-03 | Cd2,CSF3,CXCL12,IL1B                                                      | 153 (15) |  |
| SFRP1                           |       | transmembrane receptor         |           | -1.413 | bias | 4.74E-03 | CASP3,GATA3,RUNX2,SERPINE1,Tcf7                                           | 189 (16) |  |
| MMP1                            |       | peptidase                      |           | 1.432  | bias | 4.74E-03 | CXCL12,JUN,NFKBIA,RUNX2,SERPINE1                                          | 152 (15) |  |
| DCN                             |       | other                          |           | -0.836 |      | 4.74E-03 | CASP3,ICAM1,IL1B,SDC1,SERPINE1                                            | 167 (23) |  |
| IL12 (family)                   |       | group                          | Activated | 2.813  | bias | 4.79E-03 | ADAM19,CD44,CD86,GATA3,IL1B,NFKBIZ,SERPINE1,SLC2A3                        | 185 (20) |  |
| FZD9                            |       | G-protein coupled receptor     |           |        |      | 4.85E-03 | Cd2,CXCL14,IFI16                                                          |          |  |
| fontolizumab                    |       | biologic drug                  |           |        |      | 4.85E-03 | FAS,LAG3,TGM5                                                             |          |  |
| GIP                             |       | other                          |           |        |      | 4.85E-03 | Cd2,Cd8,Tcf7                                                              |          |  |
| CD70                            |       | cytokine                       |           |        |      | 4.85E-03 | BCL2A1,CD44,FAS                                                           | 140 (19) |  |
| IL1RAP                          |       | transmembrane receptor         |           |        |      | 4.85E-03 | Cd14,CD40,IL1RL1                                                          | 134 (10) |  |
| S1PR2                           |       | G-protein coupled receptor     |           |        |      | 4.85E-03 | Cd2,ICAM1,JUN                                                             | 197 (20) |  |
| KLK5                            |       | peptidase                      |           |        |      | 4.85E-03 | Cd8,ICAM1,IL1B                                                            |          |  |
| 7-nitroindazole                 |       | chemical reagent               |           |        |      | 4.85E-03 | GSTP1,NFKBIA,PRKG1                                                        |          |  |
| phenyl-N-tert-butylitron        |       | chemical reagent               |           |        |      | 4.85E-03 | CD40,CD83,CD86                                                            | 169 (14) |  |
| glutaryl-Sa-methylselenocyste   |       | chemical - endogenous mamma    |           |        |      | 4.85E-03 | GSTP1,ID1,JUN                                                             |          |  |
| IB                              |       | cytokine                       |           |        |      | 4.94E-03 | ADAM19,CD14,CD86,CSF1,CSF3,FAS                                            | 165 (19) |  |
| MAP2K6                          |       | kinase                         |           | -0.763 | bias | 4.94E-03 | Cd2,CD40,CD83,CD86,JUN,RELB                                               | 138 (17) |  |
| doxycycline                     |       | chemical drug                  |           | 1.000  |      | 4.94E-03 | BMP2,CD86,CXCL12,SDC1,SOD2,XDH                                            | 127 (13) |  |
| ESRRA                           |       | ligand-dependent nuclear recep |           | 1.562  | bias | 4.99E-03 | ALAS1,CCR7,CEBPA,CSF3,IKK1,HK2,KRT19,KRT20,KRT23,RUNX2                    | 80 (5)   |  |
| acetaminophen                   |       | chemical drug                  | Activated | 2.304  | bias | 4.99E-03 | CASP3,Cd2,CXCR3,FAS,GSTP1,HMGCS2,ICAM1,IL1B,JUN,NQO1                      | 187 (19) |  |
| diethylstilbestrol              |       | chemical toxicant              |           | 0.555  |      | 5.07E-03 | CASP3,CXCL12,GSTP1,Hspa1b,KRT8,DAT,Vnn3                                   | 136 (7)  |  |
| L-methionine                    |       | chemical - endogenous mamma    |           |        |      | 5.14E-03 | BUB1,GADD45B,IFI16,NFKBIA,SOD2                                            | 143 (7)  |  |
| CASP8                           |       | peptidase                      |           |        |      | 5.14E-03 | CD14,CD44,CSF1,FAS,IL1B                                                   | 139 (14) |  |
| LPL                             |       | enzyme                         |           | 1.792  | bias | 5.14E-03 | AP0A1,CASP3,CSF1,ICAM1,IL1B                                               | 208 (20) |  |
| MAPK31                          |       | kinase                         | Activated | 2.176  | bias | 5.14E-03 | BIRC3,FAS,HSPB1,JUN,SERPINE1                                              | 146 (18) |  |
| RGS10                           |       | other                          |           |        |      | 5.14E-03 | Cd8,CXCR3,FAS,IL1B,IL6ST                                                  | 121 (10) |  |
| DETA-NONOate                    |       | chemical reagent               |           | 0.365  |      | 5.14E-03 | BIRC3,FAS,ICAM1,PRKG1,SERPINE1                                            | 202 (23) |  |
| ARRB2                           |       | other                          |           | -1.987 |      | 5.16E-03 | Cd2,IL1B,NFKBIZ,SERPINE1                                                  | 182 (18) |  |
| MAR2                            |       | kinase                         |           | 1.000  | bias | 5.16E-03 | BATF,CD44,NFKBIZ,Vnn3                                                     |          |  |
| green tea polyphenol            |       | chemical drug                  |           | -1.067 | bias | 5.16E-03 | CASP3,ICAM1,IL1B,JUN                                                      | 139 (15) |  |
| barboxolone                     |       | chemical drug                  |           | 1.067  | bias | 5.16E-03 | CEBPA,FTH1,NFKBIA,NQO1                                                    |          |  |
| PD173074                        |       | chemical reagent               | Activated | 2.449  | bias | 5.27E-03 | CCR7,CEBPA,DEPP1,GATA3,KRT23,PRRS                                         |          |  |
| lactic acid                     |       | chemical toxicant              | Activated | 2.919  | bias | 5.35E-03 | CASP3,Cd2,FOSL1,GADD45B,GAP43,IL1B,JUN,SDC1,SLC39A4                       | 169 (18) |  |
| IL1RN                           |       | cytokine                       | Inhibited | -2.179 |      | 5.52E-03 | CD44,HBPD,ICAM1,IL1B,KLF9,OASL,RIPK2,SERPINE1                             | 175 (19) |  |
| MOG                             |       | other                          |           |        |      | 5.56E-03 | Cd2,CD40,CD44,CD86,ICAM1                                                  | 156 (16) |  |
| mr-34a-5p (and other mRNA       |       | mature microRNA                | Inhibited | -2.215 | bias | 5.56E-03 | ICAM1,JAG1,KLF4,MCM3,NOTCH2                                               |          |  |
| BNIP3L                          |       | other                          |           | 0.000  | bias | 5.56E-03 | BLNK,Cd2,CNA2,NFKBIA,PTK2B                                                | 110 (11) |  |
| bucouline                       |       | chemical - endogenous non-ma   | Activated | 2.191  | bias | 5.56E-03 | GADD45B,HK2,JUN,KLF4,SLC2A3                                               | 162 (12) |  |
| PRKCE                           |       | kinase                         |           | 1.633  | bias | 5.61E-03 | AMIGO2,BIRC3,CSF3,IL1B,IL6ST,JUN                                          | 164 (17) |  |
| CCL5                            |       | cytokine                       | Activated | 2.416  | bias | 5.61E-03 | ALCAM,Cd2,CD40,CD44,HMGA1,IL1B                                            | 166 (18) |  |
| 1-methyl-4-phenyl-1,2,3,6-tetra |       | chemical toxicant              | Activated | 2.180  | bias | 5.61E-03 | CASP3,Cd2,HSPB1,IL1B,JUN,SOD2                                             | 171 (15) |  |
| rottem                          |       | chemical toxicant              | Inhibited | -2.415 | bias | 5.61E-03 | AP0BEC3B,BIRC3,Cd2,CD44,ICAM1,JUN                                         | 195 (18) |  |
| Ctbp                            |       | group                          |           |        |      | 5.73E-03 | GATA3,JUP,PERP                                                            |          |  |
| IFNW1                           |       | cytokine                       |           |        |      | 5.73E-03 | CD40,CD83,CD86                                                            |          |  |
| GLIS2                           |       | transcription regulator        |           |        |      | 5.73E-03 | Cd2,LTBP2,SERPINE1                                                        |          |  |
| S100B                           |       | other                          |           |        |      | 5.73E-03 | Cd2,IL1B,JUN                                                              | 177 (19) |  |
| TAF1                            |       | transcription regulator        |           |        |      | 5.73E-03 | BCL2A1,CNA2,RUNX2                                                         | 135 (7)  |  |
| PLA2G4A                         |       | enzyme                         |           |        |      | 5.73E-03 | Cd2,ICAM1,IL1B                                                            | 154 (16) |  |
| CXCL3                           |       | cytokine                       |           |        |      | 5.73E-03 | Cd2,ICAM1,IL1B                                                            | 199 (19) |  |
| EGLN3                           |       | enzyme                         |           |        |      | 5.73E-03 | Cd2,Hamp/Hamp2,IL1B                                                       | 149 (7)  |  |
| ACTN4                           |       | transcription regulator        |           |        |      | 5.73E-03 | IL1B,PDLM1,SERPINE1                                                       | 115 (9)  |  |
| propionic acid                  |       | chemical - endogenous mamma    |           |        |      | 5.73E-03 | CCR7,ICAM1,IL1B                                                           |          |  |
| lesinapr                        |       | biologic drug                  |           |        |      | 5.73E-03 | Cd2,IL1B,JUN                                                              | 165 (14) |  |
| ZC3H12A                         | 1,270 | enzyme                         |           | 0.105  | bias | 5.74E-03 | Cd2,CEBPA,CEBPD,IL1B                                                      | 171 (15) |  |
| SU6656                          |       | chemical toxicant              |           |        |      | 5.74E-03 | Cd2,CSF1,IL1RL1,KRT8                                                      | 166 (15) |  |
| nicotinic acid                  |       | chemical - endogenous mamma    |           | -1.192 |      | 5.74E-03 | ANG2,APOA1,CD86,IL1B                                                      | 156 (15) |  |
| sodium orthovanadate            |       | chemical reagent               |           | 1.000  | bias | 5.74E-03 | CNA2,CEBPA,NFKBIA,SERPINE1                                                | 201 (22) |  |



|                                  |       |                                 |        |      |  |          |                                                             |          |
|----------------------------------|-------|---------------------------------|--------|------|--|----------|-------------------------------------------------------------|----------|
| CCAR1                            |       | transcription regulator         |        |      |  | 6.08E-03 | CEBPA,CEBPD                                                 |          |
| CCN6                             |       | growth factor                   |        |      |  | 6.08E-03 | BMP4,ICAM1                                                  |          |
| Cd3                              |       | complex                         |        |      |  | 6.08E-03 | CD40,CD86                                                   | 100 (7)  |
| PXN                              |       | other                           |        |      |  | 6.08E-03 | KLK3,VCL                                                    | 136 (7)  |
| CSRP3                            |       | other                           |        |      |  | 6.08E-03 | DMD,KRT8                                                    |          |
| SDC4                             | 0,444 | other                           |        |      |  | 6.08E-03 | IL1B,KLF4                                                   | 104 (7)  |
| W-54011                          |       | chemical reagent                |        |      |  | 6.08E-03 | CD86,IL1B                                                   |          |
| PTPRR                            |       | phosphatase                     |        |      |  | 6.08E-03 | FOSL1,JUN                                                   |          |
| PIPSK1B                          |       | kinase                          |        |      |  | 6.08E-03 | IL1B,PIPSK1C                                                |          |
| FGF18                            |       | growth factor                   |        |      |  | 6.08E-03 | CSF1,RUNX2                                                  |          |
| STX2                             |       | transporter                     |        |      |  | 6.08E-03 | BMP2,BMP4                                                   | 130 (7)  |
| ABCB7                            |       | transporter                     |        |      |  | 6.08E-03 | FTH1,FTL                                                    | 36 (3)   |
| SERPIND1                         |       | other                           |        |      |  | 6.08E-03 | Cd2,IL1B                                                    | 108 (7)  |
| ferric nitrotriacetate           |       | chemical toxicant               |        |      |  | 6.08E-03 | ID3,KLF4                                                    |          |
| FC-09                            |       | chemical reagent                |        |      |  | 6.08E-03 | CD40,CD86                                                   |          |
| calcium chloride                 |       | chemical drug                   |        |      |  | 6.08E-03 | ENPP1,ID3                                                   | 106 (7)  |
| ferric chloride                  |       | chemical toxicant               |        |      |  | 6.08E-03 | FTH1,FTL                                                    |          |
| phenylamil                       |       | chemical reagent                |        |      |  | 6.08E-03 | ID1,RUNX2                                                   |          |
| zifenopril                       |       | chemical drug                   |        |      |  | 6.08E-03 | Gd2,CSF1                                                    |          |
| NEAT1                            |       | transcription regulator         |        |      |  | 6.26E-03 | B3GAT1,CD40,FAS,ICAM1,IL1B,NQO1,PLS3                        | 187 (21) |
| Ipxoxin A4                       |       | chemical - endogenous mamma     | -1,982 | bias |  | 6.35E-03 | Cd2,ICAM1,IL1B,SERPINE1                                     | 198 (21) |
| 3-methyladenine                  |       | chemical toxicant               | 0,334  |      |  | 6.35E-03 | CD40,CD86,IL1B,RUNX2                                        | 187 (21) |
| asoprenil                        |       | chemical drug                   | -1,000 | bias |  | 6.35E-03 | CASP3,LAMB3,SPN,XDH                                         |          |
| amodafone                        |       | chemical drug                   |        |      |  | 6.35E-03 | HPN,ICAM1,SLC2A3,SOD2                                       |          |
| NCOR2                            |       | transcription regulator         |        |      |  | 6.47E-03 | BIRC3,CEBPA,IL1B,JUN,RELB                                   | 180 (17) |
| SERPINE1                         |       | other                           | -0,600 |      |  | 6.47E-03 | BCL2A1,CEBPA,CYBA,NFKBIA,SOD2                               | 208 (20) |
| luteolin                         |       | chemical drug                   | 0,492  | bias |  | 6.47E-03 | CASP3,FAS,ICAM1,JUN,SOD2                                    | 184 (19) |
| EGR2                             |       | transcription regulator         | 1,823  | bias |  | 6.54E-03 | CAMK4,GATA3,ID3,IL1B,IL17R,JUN,LAQ3,LAMA2,ZBTB16            | 155 (13) |
| potassium chloride               |       | chemical drug                   | 1,087  | bias |  | 6.58E-03 | AMIGO2,CASP3,Cd2,ID3,IL1B,JUN                               | 183 (19) |
| THRA                             |       | ligand-dependent nuclear recept | 0,577  |      |  | 6.61E-03 | APOA1,BMP4,CAMK4,Cd2,CD44,CEBPA,JUN,SERPINE1                | 184 (25) |
| Pde4                             |       | group                           |        |      |  | 6.70E-03 | CD14,CD40,ICAM1                                             | 129 (12) |
| CKKS1                            |       | kinase                          |        |      |  | 6.70E-03 | CD14,IL1B,SERPINE1                                          | 180 (14) |
| TNFRSF11B                        |       | transmembrane receptor          |        |      |  | 6.70E-03 | BMP2,Cd2,RUNX2                                              | 118 (9)  |
| Ibutilinb                        |       | chemical drug                   |        |      |  | 6.70E-03 | CD4,CD86,FAS                                                | 136 (16) |
| NT5E                             |       | phosphatase                     |        |      |  | 6.70E-03 | Cd2,IL1B,SERPINE1                                           | 175 (21) |
| POCD4                            |       | other                           |        |      |  | 6.70E-03 | CASP3,IL1B,JUN                                              | 199 (18) |
| RARRS2                           |       | transmembrane receptor          |        |      |  | 6.70E-03 | Cd2,CdNA2,IL1B                                              | 61 (4)   |
| PS-1145                          |       | chemical - kinase inhibitor     |        |      |  | 6.70E-03 | ICAM1,NFKBIA,TNFAIP3                                        | 109 (12) |
| thioridazine                     |       | chemical drug                   |        |      |  | 6.70E-03 | DEPP1,HPN,SLC2A3                                            |          |
| vitamin K2                       |       | chemical drug                   |        |      |  | 6.70E-03 | CD14,CSF1,SERPINE1                                          |          |
| magnesium                        |       | chemical - endogenous mamma     |        |      |  | 6.70E-03 | BMP4,PTIP42,RUNX2                                           |          |
| CXCL8                            |       | cytokine                        | 1,671  | bias |  | 6.73E-03 | CD44,FAS,ICAM1,IL1B,KLK3,NFKBIA                             | 174 (17) |
| TGFA                             |       | growth factor                   | 1,371  | bias |  | 6.73E-03 | BIRC3,Cd2,GSTP1,ICAM1,LAMC2,SERPINE1                        | 239 (21) |
| apigenin                         |       | chemical - endogenous non-mar   | -1,513 | bias |  | 6.73E-03 | CASP3,Cd2,ICAM1,IL1B,KLK3,SOD2                              | 146 (16) |
| SUZ12                            |       | enzyme                          | 1,000  |      |  | 6.90E-03 | IRAK3,KLF4,LAMB3,LAMC2,LITAF,MGAT4B,Nes,PLCB4               | 79 (5)   |
| L-glutamic acid                  |       | chemical - endogenous mamma     | 2,571  | bias |  | 6.93E-03 | CASP3,Cd2,GADD45B,IL1B,JUN,MSLL,RUNX2                       | 202 (20) |
| Mapk                             |       | group                           | 2,000  |      |  | 6.93E-03 | AP0A1,CD44,IL1B,IRAK3,TGFB7,JUN,RUNX2                       | 221 (27) |
| MAP-13p (and other miRNAs w      |       | mature microRNA                 | -3,123 | bias |  | 6.94E-03 | CSRP1,LASP1,LRP1,MOV10,NOTCH2,OAT,PREX1,SDCA,SH2D4A,UNC93B1 |          |
| MAP2K4                           |       | kinase                          | 1,996  |      |  | 6.96E-03 | BIRC3,CD44,CD86,FAS,JUN                                     | 194 (18) |
| PTK2                             |       | kinase                          | -0,371 | bias |  | 6.98E-03 | BIRC3,Cd2,KRT18,PTK2B,SERPINE1                              | 136 (7)  |
| CC111                            |       | cytokine                        | 2,190  | bias |  | 6.98E-03 | BMP6,CXCL12,FAS,ICAM1,IL1B                                  | 121 (14) |
| thiodic acid                     |       | chemical drug                   |        |      |  | 6.98E-03 | Cd2,ICAM1,JUN,NQO1,SOD2                                     | 139 (16) |
| 3M-001                           |       | chemical drug                   | 1,987  | bias |  | 7.01E-03 | CD40,CD83,CD86,IL1B                                         | 100 (7)  |
| HSF2                             |       | transcription regulator         |        |      |  | 7.01E-03 | Hspa1b,HSPB1,IL1B,JUN                                       |          |
| IL27RA                           |       | transmembrane receptor          | -1,414 | bias |  | 7.01E-03 | CD44,CD86,FAS,IL1B                                          | 166 (17) |
| pentoxifylline                   |       | chemical drug                   | -1,091 | bias |  | 7.01E-03 | Cd2,ICAM1,IL1B,NFKBIA                                       | 147 (16) |
| NR12                             |       | ligand-dependent nuclear recept | -0,218 |      |  | 7.07E-03 | ALAS1,ANG,CEBPA,CYP3A7,GSTP1,Hamp/Hamp2,HMGCS2,JUN,PGD      | 83 (8)   |
| FFAR3                            |       | G-protein coupled receptor      | 1,039  |      |  | 7.14E-03 | BCL11A,CCR7,GBP6,ICAM1,IL1B,RCN1                            |          |
| apronoladone                     |       | chemical drug                   | -2,418 | bias |  | 7.14E-03 | BMP4,CASP3,Cd2,CCR7,ICAM1,IL1B                              | 151 (16) |
| SLC2                             |       | transporter                     | -0,562 | bias |  | 7.28E-03 | CASP3,FAS,GAP43,GZMA,ICAM1,IL1B,NFKBIA                      | 178 (18) |
| MR-155-5p (miRNAs w/seel U       |       | mature microRNA                 | -2,945 | bias |  | 7.35E-03 | AMIGO2,Cd2,IL1B,PLXND1,POLE4,RAB27B,SERPINE1,SLC30A1,TRIP13 | 146 (12) |
| dalfampridine                    |       | chemical drug                   | 2,191  | bias |  | 7.48E-03 | GADD45B,HK2,JUN,KLF4,SLC2A3                                 | 176 (12) |
| pravastatin                      |       | chemical drug                   |        |      |  | 7.48E-03 | CD40,ICAM1,IL1B,RHO,SDC4                                    | 150 (15) |
| metformin                        |       | chemical drug                   | -0,900 | bias |  | 7.64E-03 | BMP2,CASP3,FTTH,GADD45B,NFKBIA,PARP14,RUNX2,SERPINE1,SOD2   | 176 (15) |
| uronil nitrate                   |       | chemical toxicant               | 1,912  |      |  | 7.64E-03 | Cd2Aa,Cd2c2 (includes others),CSRP1,ESD,FBP1,FTL,RACK1      |          |
| TGFB2                            |       | growth factor                   | -0,116 | bias |  | 7.64E-03 | BMP4,CD40,CD86,DOCK4,FAS,JAG1,SERPINE1                      | 209 (19) |
| CP-55940                         |       | chemical reagent                |        |      |  | 7.70E-03 | CSF1,JUN,NFKBIA,TNFAIP3                                     | 86 (7)   |
| DL4                              |       | other                           | 0,000  |      |  | 7.70E-03 | GATA3,MCMB,REL,B,1c7                                        |          |
| TWIST2                           |       | transcription regulator         | 1,000  | bias |  | 7.70E-03 | BCL11A,CD44,IL1B,KLF8                                       |          |
| SUMO3                            |       | other                           | 1,087  |      |  | 7.70E-03 | CAV2,CXCL16,HMGA1,RNASE4                                    |          |
| tempol                           |       | chemical drug                   | -1,000 | bias |  | 7.70E-03 | BMP4,ICAM1,SERPINE1,SOD2                                    | 171 (18) |
| temozolomide                     |       | chemical drug                   | -0,283 |      |  | 7.70E-03 | CASP3,FAS,NFKBIA,SOD2                                       | 195 (20) |
| 11,12-epoxyoctadecatrienoic acid |       | chemical - endogenous mamma     |        |      |  | 7.76E-03 | CD44,ICAM1,NFKBIA                                           | 100 (9)  |
| SRNA40                           |       | chemical reagent                |        |      |  | 7.76E-03 | CD83,CD86,IL1B                                              | 144 (16) |
| WLS                              |       | other                           |        |      |  | 7.76E-03 | BMP4,Cd2,IL36G                                              |          |
| MSR1                             |       | transmembrane receptor          |        |      |  | 7.76E-03 | ACOD1,CD40,IL1B                                             | 138 (15) |
| GDF15                            | 0,675 | growth factor                   |        |      |  | 7.76E-03 | GDF15,RND3,SERPINE1                                         | 153 (9)  |
| TFAM                             |       | transcription regulator         |        |      |  | 7.76E-03 | FABP5,IKK1,IL1B                                             |          |
| HOXD3                            |       | transcription regulator         |        |      |  | 7.76E-03 | JUP,SDC1,SERPINE1                                           |          |
| CND3                             |       | kinase                          |        |      |  | 7.76E-03 | CEBPA,KLK3,MCMB                                             | 114 (7)  |
| IL11RA                           |       | transmembrane receptor          |        |      |  | 7.76E-03 | Cd2,Cd8,OLCA1                                               |          |
| THZ1                             |       | chemical - kinase inhibitor     |        |      |  | 7.76E-03 | BIRC3,CD2,QSOX1                                             |          |
| suifasalsazine                   |       | chemical drug                   |        |      |  | 7.76E-03 | ICAM1,IL1B,NFKBIA                                           | 193 (21) |
| 2,4-dinitrofluorobenzene         |       | chemical toxicant               |        |      |  | 7.76E-03 | Cd2,ICAM1,IL1B                                              | 117 (7)  |
| CD28                             | 5,675 | transmembrane receptor          | 2,339  | bias |  | 7.76E-03 | BCL2A1,CASP3,CD28,CD86,CXCR3,GATA3,GZMA,HK2,HOMER2,IL1B     | 166 (18) |
| 3,4,5,3',4'-pentachlorobiphenyl  |       | chemical toxicant               | 1,461  | bias |  | 8.01E-03 | BMP4,CD44,CYP3A7,GSTP1,JUN,NQO1                             | 122 (10) |
| plicamycin                       |       | chemical drug                   | 0,114  | bias |  | 8.02E-03 | Cd2,ID1,Marcas,SERPINE1,SERPINE2,SLC11A2,WWC1               | 147 (7)  |
| PTGES                            |       | enzyme                          |        |      |  | 8.03E-03 | Cd2,CXCL14,CYBA,IL1B,SERPINE1                               | 137 (7)  |
| chloroquine                      |       | chemical drug                   | -1,498 |      |  | 8.03E-03 | CD40,CD83,CD86,IL1B,RUNX2                                   | 190 (20) |
| CLOCK                            |       | transcription regulator         | -0,239 |      |  | 8.12E-03 | AHNK2,CD86,CEBPA,DTX4,GADD45B,HMGCS2,Hspa1b,ICAM1,ID1,MAPK4 |          |
| EZF1                             |       | transcription regulator         | 1,269  | bias |  | 8.16E-03 | BMP4,CASP3,CDNA2,CD44,CD9,CEBPA,FAS,HMGA1,Hspa1b,ICAM1      | 221 (21) |
| NR1H4                            |       | ligand-dependent nuclear recept | 0,233  |      |  | 8.23E-03 | AP0A1,Cd2,CEBPA,FABP5,FAS,GSTA3,IL1B,KLF4,SDC1              | 198 (16) |
| nicotinic acetylcholine receptor |       | complex                         |        |      |  | 8.40E-03 | ID1,JUN                                                     | 137 (7)  |
| triamcinolone hexacetinide       |       | chemical drug                   |        |      |  | 8.40E-03 | ICAM1,IL1B                                                  |          |
| ANKRD42                          |       | transcription regulator         |        |      |  | 8.40E-03 | CSF3,IL1B                                                   |          |
| SFRP5                            |       | transmembrane receptor          |        |      |  | 8.40E-03 | Cd2,IL1B                                                    | 96 (7)   |
| valine                           |       | chemical - endogenous mamma     |        |      |  | 8.40E-03 | CD83,SOD2                                                   |          |
| Iguratmod                        |       | chemical drug                   |        |      |  | 8.40E-03 | Cd2,CSF3                                                    | 144 (14) |
| Sk                               |       | group                           |        |      |  | 8.40E-03 | ICAM1,IL1B                                                  | 196 (24) |
| HNRPNR                           |       | other                           |        |      |  | 8.40E-03 | Calb1,Nes                                                   |          |
| TSC2D1                           |       | transcription regulator         |        |      |  | 8.40E-03 | IL1B,SERPINE1                                               | 103 (10) |
| C6                               |       | other                           |        |      |  | 8.40E-03 | Cd2,IL1B                                                    |          |
| CHGA                             |       | other                           |        |      |  | 8.40E-03 | IL1B,SERPINE2                                               | 146 (7)  |
| ERBIN                            |       | other                           |        |      |  | 8.40E-03 | Ng1,SERPINE1                                                |          |
| KLK81                            |       | peptidase                       |        |      |  | 8.40E-03 | ICAM1,KLF4                                                  |          |
| TSPO                             |       | transmembrane receptor          |        |      |  | 8.40E-03 | ICAM1,SOD2                                                  |          |
| teasaponin                       |       | chemical - endogenous non-mar   |        |      |  | 8.40E-03 | IL1B,NFKBIA                                                 |          |
| WNT10B                           |       | other                           |        |      |  | 8.40E-03 | CEBPA,RUNX2                                                 | 130 (7)  |
| PILRA                            |       | other                           |        |      |  | 8.40E-03 | Cd2,IL1B                                                    | 82 (7)   |
| nicozanil                        |       | chemical drug                   |        |      |  | 8.40E-03 | CASP3,JUN                                                   | 111 (7)  |
| thienoylfluoroacetone            |       | chemical reagent                |        |      |  | 8.40E-03 | BIRC3,SERPINE1                                              |          |
| ARA-014418                       |       | chemical reagent                |        |      |  | 8.40E-03 | CD44,GDF15                                                  |          |
| 6-methylsulfinylhexyl isothioyc  |       | chemical reagent                |        |      |  | 8.40E-03 | GSTP1,NQO1                                                  | 45 (3)   |
| zimalidine                       |       | chemical drug                   |        |      |  | 8.40E-03 | DEPP1,HPN                                                   |          |
| 75K                              |       | other                           |        |      |  | 8.40E-03 | Calb1,Nes                                                   |          |
| mandipine                        |       | chemical drug                   |        |      |  | 8.40E-03 | IL1B,JUN                                                    | 142 (9)  |
| polyphosphate                    |       | chemical - endogenous mamma     |        |      |  | 8.40E-03 | BMP2,ICAM1                                                  |          |
| BAR501                           |       | chemical reagent                |        |      |  | 8.40E-03 | Cd2,IL1B                                                    |          |
| cyclosporin                      |       | biologic drug                   |        |      |  | 8.40E-03 | ICAM1,LAMA2                                                 |          |
| MR-30c-5p (and other miRNAs      |       | mature microRNA                 | -2,580 | bias |  | 8.41E-03 | CPNE8,JUN,PTGFRN,PTPRK,RAB27B,RUNX2,SLC12A4                 |          |
| BMPRI1A                          |       | kinase                          | 1,981  | bias |  | 8.45E-03 | Hamp/Hamp2,ID1,ID3,SERPINE1                                 | 173 (14) |
| TFAP4                            |       | transcription regulator         | -0,762 |      |  | 8.45E-03 | CD44,CDLM4,GDF15,ID1                                        |          |
| NEDD9                            |       | other                           | 2,000  | bias |  | 8.45E-03 | BMP2,GDF15,LRP1,SERPINE1                                    |          |
| propofol                         |       | chemical drug                   | -1,982 | bias |  | 8.45E-03 | CASP3,CD14,IL1B,SOD2                                        | 175 (13) |
| IFNL1                            |       | cytokine                        | 2,219  | bias |  | 8.47E-03 | CCR7,CD40,CD83,MLKL,OASL,SP110                              | 172 (17) |
| FGF19                            |       | growth factor                   |        |      |  | 8.47E-03 | AMY2A,BTG3,FABP5,FBP1,ID1,Saa3                              |          |
| ITGB1                            |       | transmembrane receptor          | 1,175  |      |  | 8.53E-03 | ADAM19,ICAM1,IL1B,TGA9,ITGB7,JUN,SERPINE1,TNFAIP3           | 196 (21) |
| PKD1                             |       | ion channel                     | -1,408 |      |  | 8.54E-03 | CAVIN1,Cd2,QLDM10,CXCL16,IL1B,IL1,KLK3,MCJ6,Ng1,RUNX2,YAP1  | 93 (7)   |
| Sma2/3                           |       | group                           |        |      |  | 8.60E-03 | AP0A1,GATA3,ID1,RUNX2,SERPINE1                              |          |
| milomycin C                      |       | chemical drug                   | 2,207  | bias |  | 8.60E-03 | CASP3,FAS,ITPIRPL2,JUN,NQO1                                 | 188 (18) |
| MEI2                             |       | transcription regulator         |        |      |  | 8.91E-03 | BMP4,GDF15,POLE4                                            |          |
| ITGAM                            |       | transmembrane receptor          |        |      |  | 8.91E-03 | CD28,CD86,IL1B                                              | 156 (19) |
| ACKR1                            |       | G-protein coupled receptor      |        |      |  | 8.91E-03 | ICAM1,IT1b,TNFAIP3                                          |          |
| SOC6                             |       | other                           |        |      |  | 8.91E-03 | CEBPD,IL1B,Vnn3                                             | 113 (10) |
| MSX1                             |       | transcription regulator         |        |      |  | 8.91E-03 | BMP2,BMP4,RUNX2                                             |          |
| NLRG5                            |       | transcription regulator         |        |      |  | 8.91E-03 | CD40,HLA-A,IL1B                                             | 142 (17) |
| 2-mercaptoacetate                |       | chemical drug                   |        |      |  | 8.91E-03 | CD83,ICAM1,IL1B                                             |          |
| alendronic acid                  |       | chemical drug                   |        |      |  | 8.91E-03 | ENPP1,ID1,IL1B                                              | 91 (7)   |
| nickel                           |       | chemical toxicant               |        |      |  | 8.91E-03 | CD86,ICAM1,SERPINE1                                         | 116 (10) |
| PKSR1                            |       | kinase                          | 0,000  | bias |  | 8.95E-03 | CD44,CXCL12,ICAM1,IL1B,SERPINE1,SOD2                        | 171 (16) |
| MAF8                             |       | transcription regulator         | 0,217  | bias |  | 8.95E-03 | AKR1B10,ALCAM,CD28,CXCL12,IL1B,OLFML2B                      |          |
| homocysteine                     |       | chemical - endogenous mamma     | 1,370  | bias |  | 8.95E-03 | AP0A1,Cd2,CXCL12,ID1,IL1B,Saa3                              | 207 (19) |
| ZEB1                             |       | transcription regulator         |        |      |  | 9.20E-03 | GATA3,KRT19,LAMC2,SERPINE1,XDH                              |          |
| PLAUR                            |       | transmembrane receptor          |        |      |  | 9.24E-03 | ANG,Cd2,FOSL1,JUN                                           | 188 (18) |
| ABL1                             |       | kinase                          | 1,921  | bias |  | 9.24E-03 | BMP2,CDNA2,CSF1,FAS                                         | 204 (21) |
| pinagidine                       |       | chemical drug                   |        |      |  | 9.24E-03 | CASP3,GADD45B,ICAM1,SERPINE1                                | 86 (7)   |
| tetraethylammonium               |       | chemical drug                   | -1,982 | bias |  | 9.24E-03 | EFHD2,FTH1,GSTO1,HSPB1                                      |          |
| prednisolone                     |       | chemical drug                   | -1,554 | bias |  | 9.37E-03 | BIRC3,CASP3,Cd2,CD86,CEBPD,FAS,GAB1,IL1B,SOD2,TNFAIP3       | 145 (15) |
| PRDM5                            |       | transcription regulator         |        |      |  | 9.45E-03 | AP0BEC3B,CYP3A7,GADD45B,NOTCH2,RUNX2,TINAGL1                |          |
| ERBB4                            |       | kinase                          | 0,447  |      |  | 9.45E-03 | ADAM19,CXCL12,GAP43,JUN,RASA3,SERPINE2                      | 191 (17) |

|                                       |       |                               |           |        |      |          |                                                                |
|---------------------------------------|-------|-------------------------------|-----------|--------|------|----------|----------------------------------------------------------------|
| NUPR1                                 |       | transcription regulator       |           | 0.688  | bias | 9.57E-03 | AP0REC3B,BUB1,CCNA2,CD68,FCHSD2,GDF15,HK2,KLF4,KLF6,LHFPL2     |
| PP1                                   |       | chemical - kinase inhibitor   |           | -1.583 | bias | 1.01E-02 | CXCL16,IL1B,JUN,SERPINE1                                       |
| HOTAIR                                |       | other                         |           | 0.819  |      | 1.01E-02 | GDF15,ICAM1,LAMB3,LAMC2                                        |
| LGR4                                  |       | transmembrane receptor        |           | -1.091 | bias | 1.01E-02 | CD14,HSD17B13,IL1B,OAT                                         |
| RCE1                                  |       | peptidase                     |           |        |      | 1.01E-02 | Cd2,CXCL12,FLT3,RCN1                                           |
| SRG                                   |       | kinase                        | Activated | 2.547  | bias | 1.01E-02 | CAVIN1,CSF3,FOSL1,ICAM1,ID1,JUN,KLK3                           |
| PARBP                                 |       | other                         |           |        |      | 1.02E-02 | KRT8,TIAM1,TST                                                 |
| CaMKII                                |       | complex                       |           |        |      | 1.02E-02 | BIRC3,CD44,IL1B                                                |
| IKK (complex)                         |       | complex                       |           |        |      | 1.02E-02 | BIRC3,ICAM1,IL1B                                               |
| SALL4                                 |       | transcription regulator       |           |        |      | 1.02E-02 | CD44,CBPBA,KRT19                                               |
| IgG1                                  |       | complex                       |           |        |      | 1.02E-02 | CD14,CD40,CD86                                                 |
| IL2RA                                 |       | transmembrane receptor        |           |        |      | 1.02E-02 | CD86,GZMA,JUN                                                  |
| mR-218-5p (and other miRNAs)          |       | mature microRNA               |           |        |      | 1.02E-02 | CASP3,LAMB3,RUNX2                                              |
| STK4                                  |       | kinase                        |           |        |      | 1.02E-02 | FAS,IL1R,YAP1                                                  |
| IGFBP5                                |       | other                         |           |        |      | 1.02E-02 | RUNX2,SERPINE1,SFN                                             |
| PLA2G6                                |       | enzyme                        |           |        |      | 1.02E-02 | Cd2,MRC1,RUNX2                                                 |
| SFTPD                                 |       | other                         |           |        |      | 1.02E-02 | Cd2,CD14,IL1B                                                  |
| GADD45A                               |       | other                         |           |        |      | 1.02E-02 | IL1B,JUN,NEK2                                                  |
| CCK2                                  |       | growth factor                 |           |        |      | 1.02E-02 | BMP4,RUNX2,SERPINE1                                            |
| DYRK1A                                |       | kinase                        |           |        |      | 1.02E-02 | APC1A1,MCM3,SERPINE1                                           |
| ELF5                                  |       | transcription regulator       |           |        |      | 1.02E-02 | GATA3,KLK3,KRT8                                                |
| Gm21596/Hmgb1                         |       | transcription regulator       |           |        |      | 1.02E-02 | CXCL12,IL1B,IL1RL1                                             |
| probucoil                             |       | chemical drug                 |           |        |      | 1.02E-02 | BMP2,CYBA,SERPINE1                                             |
| agmatine                              |       | chemical - endogenous mamma   |           |        |      | 1.02E-02 | BMP2,BMP4,ICAM1                                                |
| fluticasone propionate                |       | chemical drug                 | 0.000     |        |      | 1.02E-02 | CD83,CD86,GADD45B,GJB2,IL1B,ITGB7,OLFM2B,SDC4,SERPINE1         |
| WT1                                   |       | transcription regulator       | 0.734     |        |      | 1.03E-02 | BCL2A1,CSF1,IL1B,JUP,KLF4,LRP1,PIR,SDC1,SERPINE1,SLC2A3        |
| MM12                                  |       | peptidase                     |           |        |      | 1.05E-02 | CD8,IL6ST,NFKBIA,PLS3,VCL                                      |
| gemfibrozil                           |       | chemical - endogenous mamma   |           |        |      | 1.05E-02 | Cd2,CXCL12,FAS,FOSL1,IL1B                                      |
| 4-phenylbutyric acid                  |       | chemical - endogenous mamma   | -0.816    |        |      | 1.05E-02 | CASP3,Cd2,CXCL12,HLA-A,PADI2,SOD2                              |
| TO-901317                             |       | chemical reagent              | -1.755    | bias   |      | 1.09E-02 | ALAS1,ALDH2,Cd2,FABP5,FBP1,GSTP1,HK2,HMGS2,IL1B,MGLL           |
| Laminin (complex)                     |       | complex                       |           |        |      | 1.10E-02 | BIRC3,RUNX2,SDC4,SERPINE1                                      |
| SLMO2                                 |       | enzyme                        | 1.067     |        |      | 1.10E-02 | CAV2,CXCL16,HMGA1,RNASE4                                       |
| AT1F1                                 |       | transcription regulator       |           |        |      | 1.10E-02 | FOSL1,FTH1,JUN,SOD2                                            |
| SAHM1                                 |       | chemical reagent              | -2.000    | bias   |      | 1.10E-02 | CD44,HK2,ID1,RHOU                                              |
| UDP                                   |       | chemical - endogenous mamma   |           |        |      | 1.11E-02 | Cd2,SERPINE1                                                   |
| L-phenylalanine                       |       | chemical - endogenous mamma   |           |        |      | 1.11E-02 | FAS,SOD2                                                       |
| salikosaponin A                       |       | chemical reagent              |           |        |      | 1.11E-02 | BMP4,JUN                                                       |
| ganglioside GM3                       |       | chemical - endogenous mamma   |           |        |      | 1.11E-02 | CD40,ICAM1                                                     |
| Calcineurin B                         |       | group                         |           |        |      | 1.11E-02 | B3GAT1,CXCR3                                                   |
| Cyp4a14                               |       | enzyme                        |           |        |      | 1.11E-02 | Cd2,IL1B                                                       |
| budilast                              |       | chemical drug                 |           |        |      | 1.11E-02 | IL1B,NCST1                                                     |
| lecithogenin                          |       | chemical - endogenous non-mar |           |        |      | 1.11E-02 | ICAM1,IL1B                                                     |
| GPR84                                 |       | G-protein coupled receptor    |           |        |      | 1.11E-02 | Cd2,IL1B                                                       |
| GSTK1                                 |       | enzyme                        |           |        |      | 1.11E-02 | Cd2,TMEM173                                                    |
| ADGRF5                                |       | G-protein coupled receptor    |           |        |      | 1.11E-02 | Cd2,CSF1                                                       |
| LTBP4                                 |       | growth factor                 |           |        |      | 1.11E-02 | BMP4,ID1                                                       |
| SMAD1/5                               |       | group                         |           |        |      | 1.11E-02 | ID1,ID3                                                        |
| IL26                                  |       | cytokine                      |           |        |      | 1.11E-02 | ICAM1,IL1B                                                     |
| ABCC1                                 |       | transporter                   |           |        |      | 1.11E-02 | CYBA,NQO1                                                      |
| PDLM7                                 |       | other                         |           |        |      | 1.11E-02 | BMP2,RUNX2                                                     |
| CD8A                                  | 8,241 | other                         |           |        |      | 1.11E-02 | CASP3,IL1B                                                     |
| SLC25A4                               |       | transporter                   |           |        |      | 1.11E-02 | BIRC3,SOD2                                                     |
| MAP3K12                               |       | kinase                        |           |        |      | 1.11E-02 | CASP3,JUN                                                      |
| CAV3                                  |       | enzyme                        |           |        |      | 1.11E-02 | CAV2,DMD                                                       |
| mR-326                                |       | microRNA                      |           |        |      | 1.11E-02 | NOTCH2,SMO                                                     |
| levetiracetam                         |       | chemical drug                 |           |        |      | 1.11E-02 | GAP43,IL1B                                                     |
| SMN1/SMN2                             |       | other                         |           |        |      | 1.11E-02 | Cd2,DMD                                                        |
| LPA                                   |       | other                         |           |        |      | 1.11E-02 | ICAM1,SERPINE1                                                 |
| RASSF10                               |       | other                         |           |        |      | 1.11E-02 | CASP3,JUN                                                      |
| LY86                                  |       | other                         |           |        |      | 1.11E-02 | CD14,CD86                                                      |
| CXCT71                                |       | chemical reagent              |           |        |      | 1.11E-02 | CD44,CXCL12                                                    |
| RBCK1                                 |       | transcription regulator       |           |        |      | 1.11E-02 | ICAM1,TNFAIP3                                                  |
| Pla2os2                               |       | other                         |           |        |      | 1.11E-02 | Cd2,Saa3                                                       |
| ULBP1                                 |       | transmembrane receptor        |           |        |      | 1.11E-02 | CD83,HLA-A                                                     |
| influncic acid                        |       | chemical drug                 |           |        |      | 1.11E-02 | CD86,FAS                                                       |
| NCX-4040                              |       | chemical drug                 |           |        |      | 1.11E-02 | GSTP1,NQO1                                                     |
| mechlorethamine                       |       | chemical drug                 |           |        |      | 1.11E-02 | CD40,IL1B                                                      |
| benzoic acid                          |       | chemical - endogenous mamma   |           |        |      | 1.11E-02 | CD86,IL1B                                                      |
| SC-58125                              |       | chemical drug                 |           |        |      | 1.11E-02 | FAS,GDF15                                                      |
| acetic acid                           |       | chemical - endogenous mamma   |           |        |      | 1.11E-02 | CASP3,JUN                                                      |
| aplidine                              |       | biologic drug                 |           |        |      | 1.11E-02 | FOSL1,JUN                                                      |
| N,N-dimethylarginine                  |       | chemical - endogenous mamma   |           |        |      | 1.11E-02 | ICAM1,SERPINE1                                                 |
| SDCS3                                 |       | phosphatase                   |           |        |      | 1.11E-02 | Cd2,CD40,CD86,ICAM1,IL1B,JUN                                   |
| tunicamycin                           |       | chemical - endogenous non-mar | -1.687    | bias   |      | 1.11E-02 | CASP3,Cd2,CEBPD,GADD45B,Hamp/Hamp2,ICAM1,IL1B,KLF4,NFKBIA,Ntg1 |
| 12-(3-adamantan-1-yl-ureido) d        |       | chemical reagent              | 0.000     |        |      | 1.12E-02 | BIRC3,CASP3,CD40,FAS,RIPK2                                     |
| BSCL2                                 |       | other                         |           |        |      | 1.12E-02 | Cd2,CBPBA,HMGA1,IL1RL1,MGLL                                    |
| NEUROG1                               |       | transcription regulator       | -1.342    |        |      | 1.12E-02 | AMISQ2,MEST,PPIC,PXDIN,SLC43A3                                 |
| methotrexate                          |       | chemical reagent              | 3.360     | bias   |      | 1.13E-02 | BUB1,CAV2,CCNA2,FGFR1,GDF15,HK1,HK2,HOMER2,KLK3,MGLL           |
| NkB-RelA                              |       | complex                       |           |        |      | 1.15E-02 | ICAM1,IL1B,NFKBIA                                              |
| PDGF-DD                               |       | complex                       |           |        |      | 1.15E-02 | CASP3,Cd2,TNFRSF12A                                            |
| MGP                                   |       | other                         |           |        |      | 1.15E-02 | JAG1,Prss1 (includes others),RUNX2                             |
| resolvin D2                           |       | chemical - endogenous mamma   |           |        |      | 1.15E-02 | Cd2,IL1B,JUN                                                   |
| IRN6                                  |       | cytokine                      |           |        |      | 1.15E-02 | CD40,CD83,CD86                                                 |
| LTB                                   |       | cytokine                      |           |        |      | 1.15E-02 | Cd2,Glycam1,IL1B                                               |
| hydrochloric acid                     |       | chemical - endogenous mamma   |           |        |      | 1.15E-02 | ICAM1,IL1B,JUN                                                 |
| iporabinomannan                       |       | chemical - endogenous non-mar |           |        |      | 1.15E-02 | CD14,ICAM1,IL1B                                                |
| diaryl trisulfide                     |       | chemical - endogenous non-mar |           |        |      | 1.15E-02 | FAS,JUN,NQO1                                                   |
| lomatstat                             |       | chemical drug                 |           |        |      | 1.15E-02 | Cd2,F11R,IL1B                                                  |
| NCOR1                                 |       | transcription regulator       |           |        |      | 1.16E-02 | CCNA2,CBPBA,HK1,IL1B,KLK3,PDE8A                                |
| mR-10                                 |       | microRNA                      | -1.166    | bias   |      | 1.16E-02 | BMP2,CD40,CD44,CD86,KLF4,SMO                                   |
| phosphate                             |       | chemical - endogenous mamma   | 2.449     | bias   |      | 1.16E-02 | BMP2,ENRPP1,FOSL1,HK2,SLC3A42,STC2                             |
| LMK2                                  |       | kinase                        | 2.193     | bias   |      | 1.17E-02 | IL1NK,Cd2,Glycam1,ICAM1,IL1B,LYN,Saa3,SDC4                     |
| JD1                                   |       | chemical reagent              | -2.213    | bias   |      | 1.19E-02 | BIRC3,Cd2,CCNA2,MCM3,TNFAIP3                                   |
| ACVR1                                 |       | kinase                        |           |        |      | 1.19E-02 | C1R,Hamp/Hamp2,ICAM1,ID1                                       |
| mR-200b-3p (and other miRNA)          |       | mature microRNA               | -1.944    | bias   |      | 1.19E-02 | BST1,JAG1,PERP,PTPN13                                          |
| ED                                    |       | transcription regulator       |           |        |      | 1.19E-02 | GATA3,KLF4,RUNX2,SCN                                           |
| SELP1G                                |       | other                         | 2.000     | bias   |      | 1.19E-02 | BCL2A1,BST1,IL1B,LAG3                                          |
| CALR                                  |       | transcription regulator       |           |        |      | 1.19E-02 | Cd2,CBPBA,ICAM1,VCL                                            |
| GABPA                                 |       | transcription regulator       |           |        |      | 1.19E-02 | FAS,IL1R,NQO1,RRAS                                             |
| 4-hydroxynonenal                      |       | chemical toxicant             | 1.091     | bias   |      | 1.19E-02 | ICAM1,IL1B,JUN,SERPINE1                                        |
| N,N,N',N'-di(4-fluorophenylacetyl)-L- |       | chemical - protease inhibitor | -2.100    | bias   |      | 1.19E-02 | CSF1,IL1B,REL,B,NR3                                            |
| NCOA1                                 |       | transcription regulator       | 1.331     | bias   |      | 1.22E-02 | CEBPA,CHD9,GJB2,KLK3,Muc1,NFKBIA,NFKBIZ,SERPINE1               |
| CDX2                                  |       | transcription regulator       | 1.032     | bias   |      | 1.22E-02 | CD9,JUN,KLF4,KRT23,LAMC2,Muc1,SCIN,UGT1A7 (includes others)    |
| EFZ3                                  |       | transcription regulator       | 0.478     | bias   |      | 1.22E-02 | CAV2,CCNA2,CD9,CXCR3,ID3,MCM3,PLCB4,Rae1d,Rae1e,SERPINE1       |
| HGX49                                 |       | transcription regulator       | 1.949     | bias   |      | 1.22E-02 | CD9P1,FLT3,HMGA1A,IL1R,JUN,LYN,PRKX3,SDC4,SERVINC2             |
| FGF8                                  |       | growth factor                 | 0.747     | bias   |      | 1.22E-02 | BMP2,BMP3,CSF3,LAMB3,RUNX2,TRIP6                               |
| CDP2A                                 |       | other                         | -0.600    | bias   |      | 1.26E-02 | HK2,LASP1,S100A16,SCIN,SERPINE2                                |
| mR-29b-3p (and other miRNAs)          |       | mature microRNA               | -2.182    | bias   |      | 1.26E-02 | CAV2,KLF4,PPIC,TNFAIP3,Tpm1                                    |
| TBP                                   |       | transcription regulator       |           |        |      | 1.26E-02 | BCL2A1,HLA-A,NFKBIA,TNFAIP3,XDH                                |
| Wnt1                                  |       | group                         |           |        |      | 1.29E-02 | CD44,CBPBA,GATA3,RUNX2                                         |
| ALB                                   |       | transporter                   | 1.982     | bias   |      | 1.29E-02 | CASP3,Cd2,CYBA,IL1B                                            |
| RAC2                                  |       | enzyme                        |           |        |      | 1.29E-02 | Gd24a,IL1B,RUNX2,ZYX                                           |
| TNC                                   |       | other                         |           |        |      | 1.29E-02 | Cd2,CD8A,CXCL12,IL1B                                           |
| OIG1                                  |       | enzyme                        | -0.928    |        |      | 1.29E-02 | DTMA,GAP43,HMGA1,JUN,JUP,NEK2                                  |
| leukotriene B4                        |       | chemical - endogenous mamma   |           |        |      | 1.30E-02 | Cd2,IL1B,JUN                                                   |
| dexamethasone phosphata               |       | chemical drug                 |           |        |      | 1.30E-02 | ID3,IL1B,NFKBIA                                                |
| deoxycorticosterone acetate           |       | chemical drug                 |           |        |      | 1.30E-02 | Gald1,CD86,CYBA                                                |
| Cbp                                   |       | group                         |           |        |      | 1.30E-02 | Cd2,CSF3,IL1B                                                  |
| daporinad                             |       | chemical drug                 |           |        |      | 1.30E-02 | ID1,SERPINE1,TRIP13                                            |
| GRHL2                                 |       | transcription regulator       |           |        |      | 1.30E-02 | BMP2,CLDN4,SEMA3B                                              |
| CD81                                  | 0.944 | other                         |           |        |      | 1.30E-02 | CD86,ICAM1,ID1                                                 |
| IL36G                                 | 6,681 | cytokine                      |           |        |      | 1.30E-02 | CD83,CSF3,MRC1                                                 |
| Cd9a1c                                |       | other                         |           |        |      | 1.30E-02 | CCNA2,MAL,MCM3                                                 |
| AZGP1                                 |       | transporter                   |           |        |      | 1.30E-02 | BMP4,HK2,KRT19                                                 |
| carvedilol                            |       | chemical drug                 |           |        |      | 1.30E-02 | CYBA,GAP43,IL1B                                                |
| N2+                                   |       | chemical reagent              |           |        |      | 1.30E-02 | BIRC3,CSF1,ICAM1                                               |
| RUNX2                                 |       | transcription regulator       | 1.726     | bias   |      | 1.31E-02 | BMP2,CBPBA,CEBPD,GADD45B,GALNT3,RUNX2,SERPINE1                 |
| TEAD1                                 | 2,637 | transcription regulator       | 2.236     | bias   |      | 1.34E-02 | ARID9,F3T1,LATS2,NFKBIZ,TRNP1                                  |
| F3                                    |       | transmembrane receptor        | 1.951     | bias   |      | 1.34E-02 | Cd2,DOCK4,ICAM1,IL1B,SERPINE1                                  |
| uric acid                             |       | chemical - endogenous mamma   | 1.178     |        |      | 1.35E-02 | Cd2,CD86,CSF3,ICAM1,IL1B,RELB                                  |
| sodium bisulfide                      |       | chemical reagent              | 0.152     |        |      | 1.39E-02 | CASP3,FAS,ICAM1,SOD2                                           |
| ZMPSTE24                              |       | peptidase                     | 1.264     | bias   |      | 1.39E-02 | Cd8,CXCL14,GADD45B,ICAM1                                       |
| PPP2CA                                |       | phosphatase                   | 2.000     | bias   |      | 1.39E-02 | Cd2,GZMA,Saa3,UPT1                                             |
| PRKACA                                |       | kinase                        | 1.951     | bias   |      | 1.39E-02 | ALAS1,ANTXR1,ANTXR2,SDC1                                       |
| dimethylnitrosamine                   |       | chemical toxicant             |           |        |      | 1.39E-02 | ICAM1,IL1B,NQO1,SOD2                                           |
| R631-8220                             |       | chemical - kinase inhibitor   | -1.987    | bias   |      | 1.39E-02 | ICAM1,IL1B,KLK3,SERPINE1                                       |
| K1                                    |       | chemical - endogenous mamma   | -1.264    | bias   |      | 1.39E-02 | CASP3,IL1B,JUN,SLC12A4                                         |
| ganglioside                           |       | chemical - endogenous mamma   |           |        |      | 1.40E-02 | Cd2,ICAM1                                                      |
| 16,16-dimethylprostaglandin E2        |       | chemical - endogenous mamma   |           |        |      | 1.40E-02 | CD44,IL1B                                                      |
| TEAD                                  |       | group                         |           |        |      | 1.40E-02 | CAV2,CD44                                                      |
| ganglioside GD3                       |       | chemical - endogenous mamma   |           |        |      | 1.40E-02 | CD40,ICAM1                                                     |
| desoxycorticosterone                  |       | chemical - endogenous mamma   |           |        |      | 1.40E-02 | CYBA,SERPINE1                                                  |
| SLC11A1                               |       | transporter                   |           |        |      | 1.40E-02 | Hamp/Hamp2,SLC11A2                                             |
| (-)-epicatechin gallate               |       | chemical - endogenous non-mar |           |        |      | 1.40E-02 | GDF15,RUNX2                                                    |
| APC/AP2                               |       | group                         |           |        |      | 1.40E-02 | JAG1,JUP                                                       |
| 5'-di(2-hydroxy-2'-guanosine          |       | chemical reagent              |           |        |      | 1.40E-02 | CD86,IL1B                                                      |
| bacterial lipopolysaccharides         |       | chemical - other              |           |        |      | 1.40E-02 | IL1B,Saa3                                                      |
| OLF4M                                 |       | other                         |           |        |      | 1.40E-02 | Cd2,IL1B                                                       |
| FBXO42                                |       | other                         |           |        |      | 1.40E-02 | CSF1,ICAM1                                                     |
| FAT1                                  |       | other                         |           |        |      | 1.40E-02 | IL1B,JUN                                                       |

|                                          |       |                                   |           |       |      |                                                                                                        |                 |
|------------------------------------------|-------|-----------------------------------|-----------|-------|------|--------------------------------------------------------------------------------------------------------|-----------------|
| PHF8                                     |       | enzyme                            |           |       |      | 1.40E-02                                                                                               | ID1,IRAK3       |
| MEMO1                                    |       | other                             |           |       |      | 1.40E-02                                                                                               | JUN,STC2        |
| STK17A                                   |       | kinase                            |           |       |      | 1.40E-02                                                                                               | GSTO1,SOD2      |
| nicotiflorin                             |       | chemical reagent                  |           |       |      | 1.40E-02                                                                                               | ICAM1,IL1B      |
| UNC5B                                    |       | transmembrane receptor            |           |       |      | 1.40E-02                                                                                               | Cd2,YAP1        |
| SERPINB2                                 |       | other                             |           |       |      | 1.40E-02                                                                                               | CNA2,CD14       |
| THBD                                     |       | transmembrane receptor            |           |       |      | 1.40E-02                                                                                               | Cd2,IL1B        |
| TRG                                      |       | other                             |           |       |      | 1.40E-02                                                                                               | CAV2,IL1B       |
| DLX1                                     |       | transcription regulator           |           |       |      | 1.40E-02                                                                                               | ARX,SERPINE1    |
| CTSZ                                     | 0,893 | peptidase                         |           |       |      | 1.40E-02                                                                                               | CD83,CD86       |
| PTGDR                                    |       | G-protein coupled receptor        |           |       |      | 1.40E-02                                                                                               | Cd2,IL1B        |
| HAS2                                     |       | enzyme                            |           |       |      | 1.40E-02                                                                                               | Cd2,CD44        |
| CDKN2B                                   |       | transcription regulator           |           |       |      | 1.40E-02                                                                                               | CD86,SERPINE1   |
| IKK4                                     |       | transcription regulator           |           |       |      | 1.40E-02                                                                                               | Cd2,NFKBIA      |
| FKBP5                                    |       | enzyme                            |           |       |      | 1.40E-02                                                                                               | ICAM1,KLK3      |
| USP37                                    |       | peptidase                         |           |       |      | 1.40E-02                                                                                               | CEBPA,ZBTB16    |
| ST6GAL1                                  |       | enzyme                            |           |       |      | 1.40E-02                                                                                               | BIRC3,SLC2A3    |
| COCH                                     |       | other                             |           |       |      | 1.40E-02                                                                                               | Cd2,IL1B        |
| IL22RA1                                  |       | transmembrane receptor            |           |       |      | 1.40E-02                                                                                               | Hamp/Hamp2,SOD2 |
| cyclic guanosine monophosphate           |       | chemical - endogenous non-mar     |           |       |      | 1.40E-02                                                                                               | CD86,IL1B       |
| asbestos                                 |       | chemical toxicant                 |           |       |      | 1.40E-02                                                                                               | FOSL1,JUN       |
| 6-aminonicotinamide                      |       | chemical reagent                  |           |       |      | 1.40E-02                                                                                               | Cd2,Saa3        |
| sulindac sulfone                         |       | chemical - endogenous mammal      |           |       |      | 1.40E-02                                                                                               | NOO1,PRKG1      |
| bupivacaine                              |       | chemical drug                     |           |       |      | 1.40E-02                                                                                               | FOSL1,HPGDGS    |
| ketorolac                                |       | chemical drug                     |           |       |      | 1.40E-02                                                                                               | Cd2,NFKBIA      |
| SR1078                                   |       | chemical reagent                  |           |       |      | 1.40E-02                                                                                               | Cd2,PADI2       |
| mR-182 inhibitor                         |       | chemical reagent                  |           |       |      | 1.40E-02                                                                                               | CASP3,NFKBIA    |
| 2,4-dinitrobenzenesulfonic acid          |       | chemical reagent                  |           |       |      | 1.40E-02                                                                                               | CD86,ICAM1      |
| YBX1                                     |       | transcription regulator           | 1,982     | bias  |      | Cd2, ID1, IRF5, KLF4, SLC2A3, STC2                                                                     |                 |
| ITGB3                                    |       | transmembrane receptor            | 0,200     | bias  |      | CD40, CSF1, IL1B, RUNX2, SERPINE1                                                                      |                 |
| CHD7                                     |       | enzyme                            |           |       |      | JAG1, PERP, POLE4                                                                                      |                 |
| Smad                                     |       | complex                           |           |       |      | ID1, ID3, SERPINE1                                                                                     |                 |
| BCL2L11                                  |       | other                             |           |       |      | CASP3, Cd2, IL1B                                                                                       |                 |
| miR-124                                  |       | microRNA                          |           |       |      | CASP3, Cd2, RUNX2                                                                                      |                 |
| BTG2                                     |       | transcription regulator           |           |       |      | IL1B, NQO1, SOD2                                                                                       |                 |
| BAG1                                     |       | other                             |           |       |      | Hspa1b, JUN, KLK3                                                                                      |                 |
| hemocyanin                               |       | biologic drug                     |           |       |      | CD14, CD83, CD86                                                                                       |                 |
| amitriptyline                            |       | chemical drug                     |           |       |      | DEP1, HPN, SLC2A3                                                                                      |                 |
| piceatannol                              |       | chemical - endogenous non-mar     |           |       |      | FAS, ICAM1, IL1B                                                                                       |                 |
| kaempferol                               |       | chemical toxicant                 |           |       |      | ICAM1, JUN, RUNX2                                                                                      |                 |
| roscovitine                              |       | chemical drug                     | -1,954    | bias  |      | CD44, CEBPA, Rael1d/Rael1a, RALA                                                                       |                 |
| EGRO                                     |       | transcription regulator           | 1,980     |       |      | ESD, ID3, JUN, PLYND1                                                                                  |                 |
| TEAD3                                    |       | transcription regulator           | 2,000     | bias  |      | ARID5B, FJX1, NFKBIZ, TRNP1                                                                            |                 |
| ABCA1                                    |       | transporter                       | -1,009    |       |      | APOA1, Cd2, CSF3, IL1B                                                                                 |                 |
| N-acetylsphingosine                      |       | chemical reagent                  | 1,969     | bias  |      | Cd2, JUN, SERPINE1, SOD2                                                                               |                 |
| dopiboprel                               |       | chemical drug                     | -1,342    |       |      | ATOH8, BMP4, CXCL12, DHRS3, STC2                                                                       |                 |
| thyroid hormone                          |       | chemical - endogenous mammal      | -1,342    |       |      | CAMK4, CNA2, CD2, ID1, OAT, PGD, RTN1, SERPINE2, TCEA3                                                 |                 |
| DMD                                      | 1,365 | other                             |           |       |      | BLNK, DMD, FTH1, Marks, PAD2, PTGFRN, SCIN, SERPINB1, SYNC, WWC1                                       |                 |
| PC-SPE5                                  |       | chemical drug                     |           |       |      | 1.56E-02<br>CNA2, CD9, FTL, ID1, IL1B, KLK3                                                            |                 |
| LCK                                      | 1,108 | kinase                            |           |       |      | 1.59E-02<br>CNA2, CD2, GADD45B, JUN, NOTCH2                                                            |                 |
| ID1                                      | 1,349 | transcription regulator           | 1,360     | bias  |      | DTX4, GATA3, ICAM1, IF16, RUNX2                                                                        |                 |
| sulindac sulfide                         |       | chemical drug                     | 1,460     |       |      | 1.59E-02<br>ESD, GDF15, KRT1B, NQO1, STC2                                                              |                 |
| ADRA1D                                   |       | G-protein coupled receptor        |           |       |      | 1.61E-02<br>CEBPD, FABP5, IL6ST, JUN                                                                   |                 |
| herbimycin                               |       | chemical - kinase inhibitor       | -1,118    | bias  |      | ICAM1, IL1B, SERPINE1, SOD2                                                                            |                 |
| SB202190                                 |       | chemical - kinase inhibitor       | -1,980    | bias  |      | 1.61E-02<br>Cd2, CD86, ICAM1, IL1B, MAPK6, SERPINE1, XDH                                               |                 |
| Tnfr5cor1                                |       | other                             |           |       |      | 1.61E-02<br>Cd2, IL1B, PERP                                                                            |                 |
| CXCL10                                   |       | cytokine                          |           |       |      | 1.61E-02<br>Cd2, CXCR3, IL1B                                                                           |                 |
| LTBP1                                    |       | other                             |           |       |      | 1.61E-02<br>BMF, GATA3, SERPINE1                                                                       |                 |
| FGF9                                     |       | growth factor                     |           |       |      | 1.61E-02<br>BMP4, CSF3, RUNX2                                                                          |                 |
| HMG2                                     |       | transcription regulator           |           |       |      | 1.61E-02<br>CSF3, IL1B, RUNX2                                                                          |                 |
| K-252                                    |       | chemical - kinase inhibitor       |           |       |      | 1.61E-02<br>CD14, JUN, SOD2                                                                            |                 |
| geranylgeranyl pyrophosphate             |       | chemical - endogenous mammal      |           |       |      | 1.61E-02<br>BMP2, ICAM1, IL1B                                                                          |                 |
| linoleic acid                            |       | chemical - endogenous mammal      |           |       |      | 1.61E-02<br>ICAM1, NFKBIA, SERPINE1                                                                    |                 |
| CEBPD                                    | 0,429 | transcription regulator           | 0,447     | bias  |      | 1.63E-02<br>BCL2A1, Cd2, CD14, CEBPD, IL1B, Saa3                                                       |                 |
| linoleic acid                            |       | chemical - endogenous mammal      | 0,468     | bias  |      | 1.68E-02<br>APOA1, Cd2, ICAM1, IL1B, NFKBIA                                                            |                 |
| ATM                                      |       | kinase                            |           |       |      | 1.68E-02<br>FAS, GADD45B, JUN, SERPINE1, TNFAIP3                                                       |                 |
| ETS2                                     |       | transcription regulator           | Activated | 2,236 | bias | 1.68E-02<br>BMP4, CSF3, ICAM1, JUN, PLA2G16                                                            |                 |
| 1L-6-hydroxymethyl-chiro-inositol        |       | chemical - kinase inhibitor       |           |       |      | 1.73E-02<br>CXCL16, GDF15                                                                              |                 |
| THOCS                                    |       | other                             |           |       |      | 1.73E-02<br>APOA1, CEBPA                                                                               |                 |
| DPY30                                    |       | other                             |           |       |      | 1.73E-02<br>ID1, ID3                                                                                   |                 |
| ADCY7                                    |       | enzyme                            |           |       |      | 1.73E-02<br>IL1RL1, IRAK2                                                                              |                 |
| FOXN1                                    |       | transcription regulator           |           |       |      | 1.73E-02<br>GZMA, SERPINB1                                                                             |                 |
| SEMA4D                                   |       | transmembrane receptor            |           |       |      | 1.73E-02<br>CD40, RAS                                                                                  |                 |
| ITGA4                                    |       | transmembrane receptor            |           |       |      | 1.73E-02<br>IL1B, TNFAIP3                                                                              |                 |
| AMEP                                     |       | transporter                       |           |       |      | 1.73E-02<br>Cd2, IL1B                                                                                  |                 |
| SPRY4-IT1                                |       | other                             |           |       |      | 1.73E-02<br>F11R, ZNF703                                                                               |                 |
| FRMD6                                    |       | other                             |           |       |      | 1.73E-02<br>BMP2, RASSF4                                                                               |                 |
| HLA-G                                    |       | other                             |           |       |      | 1.73E-02<br>CD8A, FAS                                                                                  |                 |
| LUM                                      |       | other                             |           |       |      | 1.73E-02<br>FAS, IL1B                                                                                  |                 |
| LY9                                      | 2,405 | other                             |           |       |      | 1.73E-02<br>CD81, ZBTB16                                                                               |                 |
| lykx1-117                                |       | other                             |           |       |      | 1.73E-02<br>JUN, RELB                                                                                  |                 |
| Sry                                      |       | transcription regulator           |           |       |      | 1.73E-02<br>IL1B, SOD2                                                                                 |                 |
| NFKBIE                                   |       | transcription regulator           |           |       |      | 1.73E-02<br>CSF3, ICAM1                                                                                |                 |
| PA2G4                                    |       | transcription regulator           |           |       |      | 1.73E-02<br>GDF15, KLK3                                                                                |                 |
| HBB                                      |       | transporter                       |           |       |      | 1.73E-02<br>ICAM1, SERPINE1                                                                            |                 |
| COP1                                     |       | enzyme                            |           |       |      | 1.73E-02<br>FAS, ICAM1                                                                                 |                 |
| S100P                                    |       | other                             |           |       |      | 1.73E-02<br>KRT19, KRT8                                                                                |                 |
| CYBA                                     | 1,652 | enzyme                            |           |       |      | 1.73E-02<br>SERPINE1, SOD2                                                                             |                 |
| zileuton                                 |       | chemical drug                     |           |       |      | 1.73E-02<br>Cd2, ICAM1                                                                                 |                 |
| astressin 2B                             |       | biologic drug                     |           |       |      | 1.73E-02<br>Cd2, SLC2A3                                                                                |                 |
| polymyxin B                              |       | biologic drug                     |           |       |      | 1.73E-02<br>APOBEC3B, IL1B                                                                             |                 |
| S-equol                                  |       | chemical drug                     |           |       |      | 1.73E-02<br>CD86, SERPINE1                                                                             |                 |
| formononetin                             |       | chemical - endogenous non-mar     |           |       |      | 1.73E-02<br>BMP2, CD86                                                                                 |                 |
| lysophosphatidylinositol                 |       | chemical - endogenous mammal      | Activated | 2,000 | bias | 1.73E-02<br>CSF3, ICAM1, IL1B, SOD2                                                                    |                 |
| JAK3                                     |       | kinase                            |           |       |      | 1.73E-02<br>CSF3, GATA3, IL7R, LAG3                                                                    |                 |
| EPF2                                     |       | transcription regulator           |           |       |      | 1.78E-02<br>CNA2, ID1, MC3J, Rael1d/Rael1a, SERPINE1                                                   |                 |
| PSEN1                                    |       | peptidase                         | -0,762    |       |      | 1.78E-02<br>AMY2A, BASP1, C1R, CASP3, CD9, CTSZ, GADD45B, GSTP1, HK1, IL1B                             |                 |
| glutamine                                |       | chemical - endogenous mammal      | Inhibited | 2,000 | bias | 1.79E-02<br>FABP5, HK1, ICAM1, JUN, KLF4, NFKBIA                                                       |                 |
| tetradotoxin                             |       | chemical drug                     |           |       |      | 1.79E-02<br>AMIGO2, FAS, ID1                                                                           |                 |
| PRKDC                                    |       | kinase                            |           |       |      | 1.79E-02<br>BIRC3, KLK3, PREX1                                                                         |                 |
| CTSS                                     |       | peptidase                         |           |       |      | 1.79E-02<br>CASP3, FAS, IL1B                                                                           |                 |
| miR-23                                   |       | microRNA                          |           |       |      | 1.79E-02<br>PTK2B, RUNX2, SOD2                                                                         |                 |
| ICOSLG, LOC102723996                     |       | other                             |           |       |      | 1.95E-02<br>Cd8, CXCL14, DHRS3, GSTP1, IL1B, ZNF703                                                    |                 |
| PTPN22                                   |       | phosphatase                       |           |       |      | 1.79E-02<br>IL1B, LAG3, MRC1                                                                           |                 |
| ESRRB                                    |       | ligand-dependent nuclear receptor |           |       |      | 1.79E-02<br>HK2, Hspa1b, POLE4                                                                         |                 |
| ozone                                    |       | chemical toxicant                 |           |       |      | 1.79E-02<br>Cd2, IL1B, JUN                                                                             |                 |
| PML                                      |       | transcription regulator           | -1,066    |       |      | 1.81E-02<br>APOA1, FAS, FTL, HSPB1, IL1B, JUP, NQO1, TNFAIP3                                           |                 |
| isoproterenol                            |       | chemical drug                     | 1,860     | bias  |      | 1.81E-02<br>ALDH3B1, CSF3, DHRS3, FOSL1, IL1B, JUN, PRKD3, SOD2                                        |                 |
| GFGR2                                    |       | kinase                            |           |       |      | 1.81E-02<br>BMP4, FAS, ICAM1, IL1B, MEST, RUNX2, TSPAN8                                                |                 |
| EPAS1                                    |       | transcription regulator           | Activated | 2,404 | bias | 1.84E-02<br>BIRC3, CEBPA, GADD45B, SERPINE1, SLC11A2, SLC2A3, SOD2, STC2, TNFAIP3, YAP1                |                 |
| SCARB1                                   |       | transporter                       | -1,387    |       |      | 1.85E-02<br>APOA1, CD86, ICAM1, IL1B                                                                   |                 |
| ITGA5                                    |       | transmembrane receptor            |           |       |      | 1.85E-02<br>CD40, CD44, IL1B, JUN                                                                      |                 |
| RETN                                     |       | other                             | 1,067     | bias  |      | 1.85E-02<br>APOA1, FABP5, ICAM1, SERPINE1                                                              |                 |
| TEAD2                                    |       | transcription regulator           | Activated | 2,000 | bias | 1.85E-02<br>ARID5B, FJX1, NFKBIZ, TRNP1                                                                |                 |
| ATF4                                     |       | transcription regulator           |           |       |      | 1.93E-02<br>GDF15, JAG1, JUN, KLF4, SOD2, STC2, TNFRSF12A, XDH                                         |                 |
| STAT4                                    |       | transcription regulator           | Activated | 2,800 | bias | 1.94E-02<br>GATA3, Hspa1b, LRP1, Me4a4b (includes others), RCN3, SERPINB1, SERPINE1, SLC2A3, STC2, Tgf |                 |
| N-cor                                    |       | group                             |           |       |      | 1.95E-02<br>Cd8, CXCL14, DHRS3, GSTP1, IL1B, ZNF703                                                    |                 |
| Mr122a.b                                 |       | group                             |           |       |      | 1.97E-02<br>Cd2, CD86, IL1B                                                                            |                 |
| CDH11                                    |       | other                             |           |       |      | 1.97E-02<br>CD9, JUP, PTK2B                                                                            |                 |
| USP7                                     |       | peptidase                         |           |       |      | 1.97E-02<br>BMF, KLK3, PDE9A                                                                           |                 |
| PLA2R1                                   |       | transmembrane receptor            |           |       |      | 1.97E-02<br>ALDH2, BDH2, SOD2                                                                          |                 |
| FABP4                                    |       | transporter                       |           |       |      | 1.97E-02<br>Cd2, FABP5, IL1B                                                                           |                 |
| CD47                                     |       | transmembrane receptor            |           |       |      | 1.97E-02<br>CSF1, FTL, IL1B                                                                            |                 |
| imipramine                               |       | chemical drug                     |           |       |      | 1.97E-02<br>DEP1, HPN, SLC2A3                                                                          |                 |
| BTNL2                                    |       | transmembrane receptor            | 1,342     | bias  |      | 1.97E-02<br>GJB2, Hspa1b, IL1RL1, SPECC1, XDH                                                          |                 |
| triadimefon                              |       | chemical toxicant                 | 1,000     | bias  |      | 1.98E-02<br>ALAS1, CYP3A7, GSTA3, TST                                                                  |                 |
| fish oils                                |       | chemical drug                     |           |       |      | 1.98E-02<br>APOA1, Cd2, CEBPA, IL1B                                                                    |                 |
| SQSTM1                                   |       | transcription regulator           |           |       |      | 1.98E-02<br>IL1B, JUN, NFKBIA, NQO1                                                                    |                 |
| CUL3                                     |       | enzyme                            | -0,849    |       |      | 1.98E-02<br>NOO1, PLS3, Prs1 (includes others), TCEA3                                                  |                 |
| ADRA1A                                   |       | G-protein coupled receptor        |           |       |      | 1.98E-02<br>CEBPD, FABP5, IL6ST, JUN                                                                   |                 |
| FOXO3                                    |       | transcription regulator           | 1,597     |       |      | 2.04E-02<br>ANKA3, BMP2, FABP5, GADD45B, HMGCS2, ICAM1, JAG1, LCP2, NFKBIA, NTN4                       |                 |
| 9-hydroxy-(S)-10,12-octadecadienoic acid |       | chemical - endogenous mammal      |           |       |      | 2.07E-02<br>SERPINE1                                                                                   |                 |
| acetylacetyl-coenzyme A                  |       | chemical - endogenous mammal      |           |       |      | 2.07E-02<br>IL1B                                                                                       |                 |
| endocannabinoid                          |       | chemical - endogenous mammal      |           |       |      | 2.07E-02<br>APOA1                                                                                      |                 |
| GPSM3                                    |       | other                             |           |       |      | 2.07E-02<br>IL1B                                                                                       |                 |
| COMMD5                                   |       | other                             |           |       |      | 2.07E-02<br>NOTCH2                                                                                     |                 |
| resubstrate                              |       | biologic drug                     |           |       |      | 2.07E-02<br>Cd2                                                                                        |                 |
| BDNF-AS                                  |       | other                             |           |       |      | 2.07E-02<br>CASP3                                                                                      |                 |
| BMP2/4                                   |       | group                             |           |       |      | 2.07E-02<br>Hamp/Hamp2                                                                                 |                 |
| patched                                  |       | group                             |           |       |      | 2.07E-02<br>SMO                                                                                        |                 |
| IRAK14                                   |       | group                             |           |       |      | 2.07E-02<br>IL1B                                                                                       |                 |
| glutethimide                             |       | chemical drug                     |           |       |      | 2.07E-02<br>ALAS1                                                                                      |                 |
| G-Actin                                  |       | group                             |           |       |      | 2.07E-02<br>JUN                                                                                        |                 |
| acridine half-mustard                    |       | chemical toxicant                 |           |       |      | 2.07E-02<br>ANTXR2                                                                                     |                 |
| WSX1-sp130                               |       | complex                           |           |       |      | 2.07E-02<br>GATA3                                                                                      |                 |
| bovine testicular hyaluronidase          |       | biologic drug                     |           |       |      | 2.07E-02<br>CD44                                                                                       |                 |
| PMM2                                     |       | enzyme                            |           |       |      | 2.07E-02<br>ICAM1                                                                                      |                 |
| NLRP2                                    |       | other                             |           |       |      | 2.07E-02<br>ICAM1                                                                                      |                 |
| IIIbbs                                   |       | other                             |           |       |      | 2.07E-02<br>IL1B                                                                                       |                 |
| PEL13                                    |       | enzyme                            |           |       |      | 2.07E-02<br>IL1B                                                                                       |                 |

|                                  |       |                               |           |        |      |          |                                 |  |
|----------------------------------|-------|-------------------------------|-----------|--------|------|----------|---------------------------------|--|
| WFDC1                            |       | other                         |           |        |      | 2,07E-02 | ICAM1                           |  |
| CMPK2                            |       | kinase                        |           |        |      | 2,07E-02 | IL1B                            |  |
| PP1PK51                          |       | phosphatase                   |           |        |      | 2,07E-02 | RUNX2                           |  |
| SV2B                             |       | transporter                   |           |        |      | 2,07E-02 | SYT1                            |  |
| SNORD21                          |       | other                         |           |        |      | 2,07E-02 | HLA-A                           |  |
| IDO2                             |       | enzyme                        |           |        |      | 2,07E-02 | CD40                            |  |
| FNDC3B                           |       | other                         |           |        |      | 2,07E-02 | RUNX2                           |  |
| CLPX                             |       | enzyme                        |           |        |      | 2,07E-02 | ALAS1                           |  |
| DAGLA                            |       | enzyme                        |           |        |      | 2,07E-02 | IL1B                            |  |
| UBN1                             |       | transcription regulator       |           |        |      | 2,07E-02 | CCNA2                           |  |
| canakinumab                      |       | biologic drug                 |           |        |      | 2,07E-02 | IL1B                            |  |
| DEPDC1                           |       | transcription regulator       |           |        |      | 2,07E-02 | TNFAIP3                         |  |
| SQMS2                            |       | enzyme                        |           |        |      | 2,07E-02 | APOA1                           |  |
| MYADM                            |       | other                         |           |        |      | 2,07E-02 | ICAM1                           |  |
| MACROD1                          |       | enzyme                        |           |        |      | 2,07E-02 | NFKBIA                          |  |
| CCDC22                           |       | other                         |           |        |      | 2,07E-02 | BIRC3                           |  |
| MLLT11                           |       | other                         |           |        |      | 2,07E-02 | CD44                            |  |
| COMMD9                           |       | other                         |           |        |      | 2,07E-02 | NOTCH2                          |  |
| KIF26B                           |       | other                         |           |        |      | 2,07E-02 | NGO1                            |  |
| CLIC1                            |       | ion channel                   |           |        |      | 2,07E-02 | IL1B                            |  |
| TCFL5                            |       | transcription regulator       |           |        |      | 2,07E-02 | CD2                             |  |
| PHF10                            |       | other                         |           |        |      | 2,07E-02 | CASP3                           |  |
| DSC2                             |       | other                         |           |        |      | 2,07E-02 | CD44                            |  |
| THUM123                          | 0,505 | other                         |           |        |      | 2,07E-02 | CD40                            |  |
| DPP3                             |       | peptidase                     |           |        |      | 2,07E-02 | NGO1                            |  |
| FANK1                            |       | transcription regulator       |           |        |      | 2,07E-02 | JUN                             |  |
| Testosterone-AR dimer            |       | complex                       |           |        |      | 2,07E-02 | KLK3                            |  |
| CEL SR3                          |       | G-protein coupled receptor    |           |        |      | 2,07E-02 | Nrg1                            |  |
| galipanten                       |       | biologic drug                 |           |        |      | 2,07E-02 | CASP3                           |  |
| landutinib                       |       | chemical drug                 |           |        |      | 2,07E-02 | ID1                             |  |
| FAS-AS1                          |       | other                         |           |        |      | 2,07E-02 | FAS                             |  |
| Ox-4503                          |       | chemical drug                 |           |        |      | 2,07E-02 | CXCL12                          |  |
| black cohosh extract             |       | chemical drug                 |           |        |      | 2,07E-02 | SERPINE1                        |  |
| GTPase                           |       | group                         |           |        |      | 2,07E-02 | BMP2                            |  |
| EIF3i                            |       | translation regulator         |           |        |      | 2,07E-02 | SERPINE1                        |  |
| ACBD3                            |       | other                         |           |        |      | 2,07E-02 | SLC11A2                         |  |
| PRCC                             |       | other                         |           |        |      | 2,07E-02 | SERPINE1                        |  |
| cabazitaxel                      |       | chemical drug                 |           |        |      | 2,07E-02 | KLK3                            |  |
| DYNLRB1                          |       | other                         |           |        |      | 2,07E-02 | SERPINE1                        |  |
| NFE2L3                           |       | transcription regulator       |           |        |      | 2,07E-02 | NGO1                            |  |
| FGF8                             |       | growth factor                 |           |        |      | 2,07E-02 | CSF3                            |  |
| COL6A3                           |       | other                         |           |        |      | 2,07E-02 | WWC1                            |  |
| RAB27A                           |       | enzyme                        |           |        |      | 2,07E-02 | CD44                            |  |
| MED7                             |       | transcription regulator       |           |        |      | 2,07E-02 | TNFAIP3                         |  |
| LINC00872                        |       | other                         |           |        |      | 2,07E-02 | LASP1                           |  |
| SLC22A1                          |       | transporter                   |           |        |      | 2,07E-02 | ICAM1                           |  |
| miR-615-5p (and other miRNAs)    |       | mature microRNA               |           |        |      | 2,07E-02 | KRT19                           |  |
| miR-690 (miRNAs wiswed AAG)      |       | mature microRNA               |           |        |      | 2,07E-02 | CEBPA                           |  |
| Mr690                            |       | microRNA                      |           |        |      | 2,07E-02 | CEBPA                           |  |
| mi-1301                          |       | microRNA                      |           |        |      | 2,07E-02 | KLF6                            |  |
| mi-613                           |       | microRNA                      |           |        |      | 2,07E-02 | RTKN                            |  |
| AQUAPORIN                        |       | group                         |           |        |      | 2,07E-02 | IL1B                            |  |
| CAMK2                            |       | group                         |           |        |      | 2,07E-02 | BIRC3                           |  |
| EPSTI1                           |       | other                         |           |        |      | 2,07E-02 | NFKBIA                          |  |
| Rae1d/Rae1e                      | 3,853 | other                         |           |        |      | 2,07E-02 | HLA-A                           |  |
| RNF14                            |       | transcription regulator       |           |        |      | 2,07E-02 | KLK3                            |  |
| PLXNB1                           |       | transmembrane receptor        |           |        |      | 2,07E-02 | KLK3                            |  |
| COL4A2                           |       | other                         |           |        |      | 2,07E-02 | FAS                             |  |
| AXIN2                            |       | other                         |           |        |      | 2,07E-02 | BMP4                            |  |
| FSMA1                            |       | peptidase                     |           |        |      | 2,07E-02 | GSTP1                           |  |
| RNF7                             |       | enzyme                        |           |        |      | 2,07E-02 | JUN                             |  |
| CTNNA1                           |       | other                         |           |        |      | 2,07E-02 | VCL                             |  |
| SART3                            |       | other                         |           |        |      | 2,07E-02 | KLK3                            |  |
| MED21                            |       | transcription regulator       |           |        |      | 2,07E-02 | TNFAIP3                         |  |
| Uox                              |       | enzyme                        |           |        |      | 2,07E-02 | IL1B                            |  |
| B3GAT2                           |       | enzyme                        |           |        |      | 2,07E-02 | B3GAT1                          |  |
| PRDM14                           |       | transcription regulator       |           |        |      | 2,07E-02 | POLE4                           |  |
| POPN                             |       | other                         |           |        |      | 2,07E-02 | CD44                            |  |
| JAK2                             |       | other                         |           |        |      | 2,07E-02 | CXCL12                          |  |
| RPN2                             |       | enzyme                        |           |        |      | 2,07E-02 | GSTP1                           |  |
| FAP                              |       | peptidase                     |           |        |      | 2,07E-02 | Cd2                             |  |
| VPS4B                            |       | transporter                   |           |        |      | 2,07E-02 | CASP3                           |  |
| ZC3H8                            |       | transcription regulator       |           |        |      | 2,07E-02 | GATA3                           |  |
| cytarabine/daunubicin            |       | chemical drug                 |           |        |      | 2,07E-02 | CEBPA                           |  |
| GDF10                            |       | growth factor                 |           |        |      | 2,07E-02 | SERPINE1                        |  |
| F12                              |       | peptidase                     |           |        |      | 2,07E-02 | IL1B                            |  |
| binapant                         |       | biologic drug                 |           |        |      | 2,07E-02 | MKL                             |  |
| quercetin-3-methyl ether         |       | chemical reagent              |           |        |      | 2,07E-02 | IL1B                            |  |
| quercetin-3,4'-dimethyl ether    |       | chemical reagent              |           |        |      | 2,07E-02 | IL1B                            |  |
| CDKL2                            |       | kinase                        |           |        |      | 2,07E-02 | CD44                            |  |
| SRRM1                            |       | other                         |           |        |      | 2,07E-02 | CD44                            |  |
| HIST1H4B                         |       | other                         |           |        |      | 2,07E-02 | Hsp91b                          |  |
| minotax free base                |       | chemical reagent              |           |        |      | 2,07E-02 | IL1B                            |  |
| IGHMBP2                          |       | enzyme                        |           |        |      | 2,07E-02 | APOA1                           |  |
| Rhodobacter sphaeroides lipop    |       | chemical - endogenous non-mar |           |        |      | 2,07E-02 | IL1B                            |  |
| 3M452                            |       | chemical drug                 |           |        |      | 2,07E-02 | Cd2                             |  |
| ETP-46464                        |       | chemical reagent              |           |        |      | 2,07E-02 | OASL                            |  |
| ISCU                             |       | other                         |           |        |      | 2,07E-02 | FTH1                            |  |
| sintokamide A                    |       | chemical reagent              |           |        |      | 2,07E-02 | KLK3                            |  |
| etfeberel                        |       | chemical drug                 |           |        |      | 2,07E-02 | IL1B                            |  |
| metaboite                        |       | chemical - endogenous mamma   |           |        |      | 2,07E-02 | NGO1                            |  |
| lipophosphonoglycan              |       | chemical - endogenous non-mar |           |        |      | 2,07E-02 | IL1B                            |  |
| 3-hydroxybutyric acid            |       | chemical - endogenous mamma   |           |        |      | 2,07E-02 | IL1B                            |  |
| SC-19220                         |       | chemical reagent              |           |        |      | 2,07E-02 | ICAM1                           |  |
| bathophenanthroline              |       | chemical reagent              |           |        |      | 2,07E-02 | GP                              |  |
| RO31-9790                        |       | chemical - protease inhibitor |           |        |      | 2,07E-02 | GAP43                           |  |
| AZ10606120                       |       | chemical reagent              |           |        |      | 2,07E-02 | CD86                            |  |
| fluorescein                      |       | chemical drug                 |           |        |      | 2,07E-02 | CASP3                           |  |
| 1-(3-(1,4-dihydroimidazo[4,5-c]p |       | chemical - kinase inhibitor   |           |        |      | 2,07E-02 | Cd2                             |  |
| pentachlorophenol                |       | chemical toxicant             |           |        |      | 2,07E-02 | NGO1                            |  |
| SiMG2N                           |       | chemical reagent              |           |        |      | 2,07E-02 | CD86                            |  |
| L18-muramyl dipeptide            |       | chemical reagent              |           |        |      | 2,07E-02 | ACOD1                           |  |
| anti-miR-32 inhibitor            |       | chemical reagent              |           |        |      | 2,07E-02 | KLF4                            |  |
| 1-methylspemidine                |       | chemical reagent              |           |        |      | 2,07E-02 | AMY2A                           |  |
| leucyl-leucine-methyl ester      |       | biologic drug                 |           |        |      | 2,07E-02 | IL1B                            |  |
| 2-methoxy-5-(2',3'-4'-trimethoxy |       | chemical reagent              |           |        |      | 2,07E-02 | JUN                             |  |
| carbon                           |       | chemical reagent              |           |        |      | 2,07E-02 | GSTP1                           |  |
| 17S-hydroperoxy-docosahexae      |       | chemical - endogenous mamma   |           |        |      | 2,07E-02 | IL1B                            |  |
| UMP                              |       | chemical - endogenous mamma   |           |        |      | 2,07E-02 | IL1B                            |  |
| cladribine                       |       | chemical drug                 |           |        |      | 2,07E-02 | IL1B                            |  |
| 2'-fucosylactose                 |       | chemical - endogenous mamma   |           |        |      | 2,07E-02 | ICAM1                           |  |
| P2y Receptor                     |       | group                         |           |        |      | 2,07E-02 | SLC2A3                          |  |
| ferric citrate                   |       | chemical drug                 |           |        |      | 2,07E-02 | FTH1                            |  |
| tetracycline                     |       | chemical drug                 | Activated | 2,000  |      | 2,08E-02 | CSF1, JAG1, MAL, SERPINE1, SOD2 |  |
| lipitride                        |       | chemical drug                 |           | -0,277 | bias | 2,08E-02 | CASP3, CXCL12, FAS, ICAM1, JUN  |  |
| coal tar                         |       | chemical drug                 |           |        |      | 2,08E-02 | GSTP1, NGO1                     |  |
| METTL3                           |       | enzyme                        |           |        |      | 2,08E-02 | CD9, SERPINE2                   |  |
| APOL1                            |       | transporter                   |           |        |      | 2,08E-02 | IFNGR2, IL1B                    |  |
| Adaptor protein 1                |       | complex                       |           |        |      | 2,08E-02 | CD44, SOD2                      |  |
| T 0070907                        |       | chemical reagent              |           |        |      | 2,08E-02 | Cd2, CEBPA                      |  |
| PLCL2                            |       | enzyme                        |           |        |      | 2,08E-02 | ID1, RUNX2                      |  |
| Alnal Natruietic Peptide         |       | group                         |           |        |      | 2,08E-02 | NPR2, SERPINE1                  |  |
| Kaikarin                         |       | group                         |           |        |      | 2,08E-02 | Cd2, ICAM1                      |  |
| astragaln                        |       | chemical - endogenous non-mar |           |        |      | 2,08E-02 | ICAM1, IL1B                     |  |
| Mcp4                             |       | peptidase                     |           |        |      | 2,08E-02 | Cd2, CLDN4                      |  |
| TXK                              |       | kinase                        |           |        |      | 2,08E-02 | CD44, ZBTB16                    |  |
| DYRK1B                           |       | kinase                        |           |        |      | 2,08E-02 | GP, SOD2                        |  |
| miR-208a-3p (and other miRNA     |       | mature microRNA               |           |        |      | 2,08E-02 | CD14, RUNX2                     |  |
| MAFF                             |       | transcription regulator       |           |        |      | 2,08E-02 | GSTP1, NGO1                     |  |
| IL17RB                           |       | transmembrane receptor        |           |        |      | 2,08E-02 | Cd2, CSF3                       |  |
| VLDR                             |       | transporter                   |           |        |      | 2,08E-02 | SERPINE1, TNFAIP3               |  |
| ENTPD1                           |       | enzyme                        |           |        |      | 2,08E-02 | CD86, SERPINE1                  |  |
| CHRNA3                           |       | transmembrane receptor        |           |        |      | 2,08E-02 | CASP3, GATA3                    |  |
| HIST2H3C                         |       | other                         |           |        |      | 2,08E-02 | IL1B, RND3                      |  |
| sevoflurane                      |       | chemical drug                 |           |        |      | 2,08E-02 | CASP3, IL1B                     |  |
| ferric ammonium citrate          |       | chemical drug                 |           |        |      | 2,08E-02 | FTH1, FTL                       |  |
| 8-chlorophenylthio-adenosine 3   |       | chemical - kinase inhibitor   |           | 1,982  | bias | 2,12E-02 | BIRC3, CASP3, CEPD, LPIN2       |  |
| IFN type 1                       |       | group                         |           | 1,969  | bias | 2,12E-02 | Cd2, IFI16, OASL, XDH           |  |
| EPHB4                            |       | kinase                        |           | 1,000  | bias | 2,12E-02 | BMP2, BMP4, GATA3, Nes          |  |
| IGFBP2                           |       | other                         |           |        |      | 2,12E-02 | CASP3, CHD9, GDF15, PTGFRN      |  |
| ARNTL                            |       | transcription regulator       |           | 0,591  | bias | 2,12E-02 | CEBPA, HMGC32, IL1B, NGO1       |  |
| LMNB1                            |       | other                         |           |        |      | 2,12E-02 | Cd2, CXCL12, FLT3, RGN1         |  |
| benfektin A                      |       | chemical - endogenous non-mar |           | -0,130 |      | 2,12E-02 | CD44, GADD45B, HLA-A, KLF4      |  |
| GRP                              |       | growth factor                 |           |        |      | 2,17E-02 | CTRB2, JUN, KLK3                |  |
| ACTL6A                           |       | other                         |           |        |      | 2,17E-02 | CCNA2, FAS, SFN                 |  |
| DL11                             |       | enzyme                        |           |        |      | 2,17E-02 | CD86, GATA3, JAG1               |  |
| CHADL                            |       | other                         |           |        |      | 2,17E-02 | Cd2, FAS, STEAP4                |  |
| CFLAR                            |       | other                         |           |        |      | 2,17E-02 | CSF3, GATA3, IL1B               |  |
| PD 123319                        |       | chemical drug                 |           |        |      | 2,17E-02 | Cd2, CY8A, SERPINE1             |  |
| chrysotile asbestos              |       | chemical toxicant             |           |        |      | 2,17E-02 | CLCA1, CTSZ, IL1B               |  |

|                                  |       |                                 |          |      |          |                                                                    |
|----------------------------------|-------|---------------------------------|----------|------|----------|--------------------------------------------------------------------|
| deoxymylenol                     |       | chemical toxicant               |          |      | 2.17E-02 | CLDN4, ICAM1, IL1B                                                 |
| stearic acid                     |       | chemical - endogenous mammal    |          |      | 2.17E-02 | ICAM1, IL1B, NFKBIA                                                |
| GnR1 analog                      |       | biologic drug                   | 0.577    |      | 2.18E-02 | ACOT7, BCL2A1, CASP3, CD40, FAS, GAB1, GSTO1, JUN, NFKBIA, PLA2G16 |
| GNA12                            |       | enzyme                          | 0.447    | bias | 2.19E-02 | CNA2, GSTA3, GSTP1, LAMB3, VCL                                     |
| PAX3                             |       | transcription regulator         |          |      | 2.21E-02 | BMP4, FLT3, ITD3, IL7R, LAMB3, MEST, PTPN14, PXDN, SFN             |
| FOXP3                            |       | transcription regulator         | 0.447    | bias | 2.21E-02 | HLA-A, IISGF3, IL11R, IL17R, LAT52, TNFAIP3                        |
| SRC (family)                     |       | group                           | 1.969    | bias | 2.26E-02 | BMP2, Ccl2, ICAM1, ID1                                             |
| RTN4                             |       | other                           |          |      | 2.26E-02 | GAP43, JUN, NQO1, Tpm1                                             |
| CN2                              |       | growth factor                   | 1.148    | bias | 2.31E-02 | BCL2A1, CD44, JUN, SDCA, SERPINE1, Tpm1                            |
| RXRα                             |       | ligand-dependent nuclear recept | 0.000    |      | 2.33E-02 | APOA1, CCR2, CNA2, CEBPA, CEBPD, CLMN, FABP5, FTL, HMGCS2, IL1B    |
| elanecept                        |       | biologic drug                   |          |      | 2.37E-02 | CD83, ICAM1, IL1B                                                  |
| LPIN1                            |       | phosphatase                     |          |      | 2.37E-02 | CEBPA, IL1B, LPIN2                                                 |
| indican                          |       | chemical - endogenous mammal    |          |      | 2.37E-02 | GATA3, ICAM1, IL1B                                                 |
| LLGL2                            |       | other                           |          |      | 2.37E-02 | CRM1, SERPINE1, SH2D4A                                             |
| Focal adhesion kinase            |       | group                           |          |      | 2.37E-02 | ICAM1, KLR3, KRT8                                                  |
| CASP3                            | 0.801 | peptidase                       |          |      | 2.37E-02 | CAMK4, CASP3, RUNX2                                                |
| ROCK1                            |       | kinase                          |          |      | 2.37E-02 | CD44, ICAM1, LAMA2                                                 |
| PRKC1                            |       | kinase                          |          |      | 2.37E-02 | OLDN4, HK1, HK2                                                    |
| NG2A4                            |       | transcription regulator         |          |      | 2.37E-02 | FABP5, JAG1, KLR3                                                  |
| ferulic acid                     |       | chemical - endogenous non-mar   |          |      | 2.37E-02 | CASP3, CSF3, IL1B                                                  |
| R-WIN 55,212                     |       | chemical reagent                |          |      | 2.37E-02 | CASP3, ICAM1, IL1B                                                 |
| glycothiazic acid                |       | chemical drug                   |          |      | 2.37E-02 | APOA1, CASP3, CD40                                                 |
| bardoxolone methyl               |       | chemical drug                   |          |      | 2.37E-02 | BIRC3, Ccl2, IL1B                                                  |
| fucoidin                         |       | chemical reagent                |          |      | 2.37E-02 | CASP3, CXCL12, IL1B                                                |
| CD5                              |       | transmembrane receptor          | 0.762    | bias | 2.40E-02 | CCR7, CD86, ICAM1, RELB                                            |
| ADM                              |       | other                           | -1.067   |      | 2.40E-02 | Ccl2, ICAM1, IL1B, PRKG1                                           |
| phenethyl isothiocyanate         |       | chemical drug                   |          |      | 2.40E-02 | BUB1, CYP3A7, GSTA3, KRT20, MAPK6, PL33                            |
| budesonide                       |       | chemical drug                   | 1.342    |      | 2.41E-02 | BTG3, Ccl2, CSF3, JUN, PDLIM1                                      |
| ascorbic acid                    |       | chemical - endogenous mammal    | -0.277   |      | 2.41E-02 | APOA1, BMP, FAS, RUNX2, SERPINE1                                   |
| FOXM1                            |       | transcription regulator         | 2.582    | bias | 2.43E-02 | CNA2, CXCL12, CXCR3, JUN, NEK2, Nes, SOD2                          |
| halofuginone                     |       | chemical drug                   |          |      | 2.43E-02 | Cd24a, CD44, CP, HK1, PLCB4, PTGFRN, PTK2B                         |
| mozafinostat                     |       | chemical drug                   |          |      | 2.47E-02 | CASP3, IL1B                                                        |
| WP1066                           |       | chemical drug                   |          |      | 2.47E-02 | CD86, IL1B                                                         |
| TCIRG1                           | 1.150 | enzyme                          |          |      | 2.47E-02 | CD44, CD86                                                         |
| CLEC1B                           |       | transmembrane receptor          |          |      | 2.47E-02 | CXCL12, LCP2                                                       |
| RGS2                             |       | other                           |          |      | 2.47E-02 | CEBPD, Vnn3                                                        |
| ALOX12                           |       | enzyme                          |          |      | 2.47E-02 | FOSL1, JUN                                                         |
| CST3                             |       | other                           |          |      | 2.47E-02 | IL1B, NFKBIA                                                       |
| PLTP                             |       | enzyme                          |          |      | 2.47E-02 | APOA1, IL1B                                                        |
| DD2                              |       | other                           |          |      | 2.47E-02 | NFKBIA, SOD2                                                       |
| BAP1                             |       | peptidase                       |          |      | 2.47E-02 | Ccl2, MCM3                                                         |
| ETV6                             |       | transcription regulator         |          |      | 2.47E-02 | CASP3, ID1                                                         |
| NUMBL                            |       | other                           |          |      | 2.47E-02 | CASP3, KLF4                                                        |
| ZBTB32                           |       | transcription regulator         |          |      | 2.47E-02 | CSF2RB, GATA3                                                      |
| HSPB8                            |       | kinase                          |          |      | 2.47E-02 | BMP4, ICAM1                                                        |
| RIPK3                            |       | kinase                          |          |      | 2.47E-02 | Ccl2, IL1B                                                         |
| PAX4                             |       | transcription regulator         |          |      | 2.47E-02 | ARX, Nes                                                           |
| AJUBA                            |       | transcription regulator         |          |      | 2.47E-02 | BUB1, DOCK1                                                        |
| ITGA3                            |       | other                           |          |      | 2.47E-02 | SERPINE1, VCL                                                      |
| CDH5                             |       | other                           |          |      | 2.47E-02 | ICAM1, ITAM1                                                       |
| IREB2                            |       | translational regulator         |          |      | 2.47E-02 | FTHL, FTL                                                          |
| ELN                              |       | other                           |          |      | 2.47E-02 | CD86, IL1B                                                         |
| PLCL1                            |       | enzyme                          |          |      | 2.47E-02 | ID1, RUNX2                                                         |
| ACO1                             |       | enzyme                          |          |      | 2.47E-02 | FTHL, FTL                                                          |
| perylene-tetrazol                |       | chemical drug                   |          |      | 2.47E-02 | IL1B, JUN                                                          |
| tenemfene                        |       | chemical drug                   |          |      | 2.47E-02 | CD86, KLR3                                                         |
| D-sphingosine                    |       | chemical - endogenous mammal    |          |      | 2.47E-02 | Ccl2, SERPINE1                                                     |
| KT5720                           |       | chemical - kinase inhibitor     |          |      | 2.47E-02 | NFKBIA, PRKG1                                                      |
| lin protoporphyrin IX            |       | chemical reagent                |          |      | 2.47E-02 | CD86, Hamp/Hamp2                                                   |
| curcubitacin B                   |       | chemical - endogenous non-mar   |          |      | 2.47E-02 | CASP3, CNA2                                                        |
| fatty acid                       |       | chemical - endogenous mammal    | 1.519    | bias | 2.50E-02 | APOA1, Ccl2, IL1B, LPIN2, NFKBIA, SERPINE1                         |
| TET2                             |       | enzyme                          | -0.378   | bias | 2.51E-02 | Ccl2, CLEC4D, IFI16, IL1B, PL33, RND3, ZBTB16                      |
| NR4A1                            |       | ligand-dependent nuclear recept | -1.615   | bias | 2.53E-02 | CEBPA, CSF1, CXCL12, FBP1, HK2, ICAM1, IL1B, JUP, KRT8, NFKBIA     |
| R5020                            |       | chemical reagent                | 1.969    | bias | 2.53E-02 | BIRC3, CEBPA, LAMC2, NFKBIA, ZBTB16                                |
| CK29                             |       | kinase                          |          |      | 2.55E-02 | ALAS1, NFKBIA, STC2, TNFAIP3                                       |
| ZEB2                             |       | transcription regulator         | -1.000   | bias | 2.55E-02 | GZMA, IL7R, KRT19, Tcf7                                            |
| AKT2                             |       | kinase                          |          |      | 2.55E-02 | BUB1, Ccl2, IRAK3, NQO1                                            |
| VAV1                             |       | transcription regulator         |          |      | 2.59E-02 | BCL2A1, JUN, RALA                                                  |
| IPR01                            |       | other                           |          |      | 2.59E-02 | CTSC, HK1, LAMA2                                                   |
| THBS4                            |       | other                           |          |      | 2.59E-02 | Ccl2, CD40, ICAM1                                                  |
| fluvoxamine                      |       | chemical drug                   |          |      | 2.59E-02 | CCR7, HTR7, RACK1                                                  |
| ERN1                             |       | kinase                          | 1.404    | bias | 2.60E-02 | ANG, Ccl2, CEBPD, FAS, IL1B, JUN, TINAGL1                          |
| SPARC                            |       | other                           | -1.353   |      | 2.60E-02 | CEBPD, CLDN4, NOTO2, PLET1, SERPINE1, SLC34A2                      |
| GAS1                             |       | other                           | 1.65E-02 | bias | 2.65E-02 | Hamp/Hamp2, JAG1, JUN, MCM3, NFKBIA                                |
| berberine                        |       | chemical drug                   | 0.686    | bias | 2.71E-02 | BIRC3, CASP3, CD40, CD86, ICAM1, IL1B                              |
| alefacept                        |       | biologic drug                   | -1.982   | bias | 2.71E-02 | CD2, CD8A, CYBA, IL7R                                              |
| oblimersen                       |       | biologic drug                   | 2.000    | bias | 2.71E-02 | CEBPD, GADD45B, IFI16, OASL                                        |
| CAT                              |       | enzyme                          | 1.067    | bias | 2.71E-02 | BCL2A1, Ccl2, CLCA1, SERPINE1                                      |
| PLAG1                            |       | transcription regulator         | 0.000    | bias | 2.71E-02 | KRT19, LILRB3, PIR, PPIC                                           |
| mi-24                            |       | microRNA                        | -0.404   |      | 2.71E-02 | CXCR3, GATA3, SERPINE1, Tcf7                                       |
| CLEC11A                          |       | growth factor                   |          |      | 2.71E-02 | CXCL12, IL1B, RUNX2, ZYX                                           |
| anisomycin                       |       | chemical - endogenous non-mar   | 1.966    | bias | 2.71E-02 | IL1R1, JUN, SDC1, SERPINE1                                         |
| SP110                            | 2.929 | transcription regulator         | -0.378   |      | 2.78E-02 | BMP4, DMD, PANK1, PERP, RIPK2, TAB3, YAP1                          |
| CAH9                             |       | other                           |          |      | 2.81E-02 | Ccl2, CSF3, IL1B                                                   |
| IHH                              |       | enzyme                          |          |      | 2.81E-02 | BMP4, RUNX2, SMO                                                   |
| PRKC2                            |       | kinase                          |          |      | 2.81E-02 | CASP3, JUN, NFKBIA                                                 |
| BECN1                            |       | other                           |          |      | 2.81E-02 | BMF, IL1B, SOD2                                                    |
| CORT                             |       | other                           |          |      | 2.81E-02 | Ccl2, CCR7, IL1B                                                   |
| N-3-(aminomethyl)benzylacetate   |       | chemical reagent                |          |      | 2.81E-02 | CASP3, FAS, RIPK2                                                  |
| hymecromone                      |       | chemical drug                   |          |      | 2.81E-02 | CASP3, CD44, FAS                                                   |
| IFNα1/IFNα13                     |       | cytokine                        | 1.131    | bias | 2.87E-02 | CD40, CD83, CD86, IL1B                                             |
| EB3                              |       | cytokine                        | 1.982    | bias | 2.87E-02 | CD86, HLA-A, ICAM1, LAG3                                           |
| MDGA2                            |       | other                           |          |      | 2.88E-02 | BCL2A1, FAS                                                        |
| FH                               |       | enzyme                          |          |      | 2.88E-02 | LTBP2, NQO1                                                        |
| CRBN                             |       | enzyme                          |          |      | 2.88E-02 | IL1B, JUN                                                          |
| hammine                          |       | chemical - endogenous non-mar   |          |      | 2.88E-02 | BMP2, RUNX2                                                        |
| SOX5                             |       | transcription regulator         |          |      | 2.88E-02 | BMP6, RUNX2                                                        |
| miR-210-3p (miRNAs w/seed UK     |       | mature microRNA                 |          |      | 2.88E-02 | FGFR1, RAD52                                                       |
| mi-127                           |       | microRNA                        |          |      | 2.88E-02 | IL1B, MRC1                                                         |
| HLA-A                            | 1.061 | other                           |          |      | 2.88E-02 | HLA-A, LAG3                                                        |
| XRD25                            |       | enzyme                          |          |      | 2.88E-02 | KLR3, XDH                                                          |
| CD180                            |       | other                           |          |      | 2.88E-02 | BCL2A1, CD86                                                       |
| NLR4                             |       | other                           |          |      | 2.88E-02 | CD86, IL1B                                                         |
| FRS2                             |       | other                           |          |      | 2.88E-02 | BMP4, CD44                                                         |
| PLA2G2E                          |       | enzyme                          |          |      | 2.88E-02 | IL1B, SERPINE1                                                     |
| UGCG                             |       | enzyme                          |          |      | 2.88E-02 | CASP3, ICAM1                                                       |
| PON1                             |       | phosphatase                     |          |      | 2.88E-02 | CD86, ICAM1                                                        |
| SDC1                             | 1.625 | enzyme                          |          |      | 2.88E-02 | Ccl2, GALNT3                                                       |
| CRV1                             |       | enzyme                          |          |      | 2.88E-02 | CEBPA, IL1B                                                        |
| CDK7                             |       | kinase                          |          |      | 2.88E-02 | STC2, TNFAIP3                                                      |
| DUSP14                           |       | phosphatase                     |          |      | 2.88E-02 | NFKBIZ, Vnn3                                                       |
| BHLHE41                          |       | transcription regulator         |          |      | 2.88E-02 | GATA3, HK2                                                         |
| HSPA1A/HSPA1B                    |       | enzyme                          |          |      | 2.88E-02 | Hspa1b, IL1B                                                       |
| 2'-3'-cyclic guanosine monophos  |       | chemical - endogenous mamma     |          |      | 2.88E-02 | CD86, IL1B                                                         |
| bisphenol A diglycidyl ether     |       | chemical reagent                |          |      | 2.88E-02 | ICAM1, SERPINE1                                                    |
| RV 538                           |       | chemical reagent                |          |      | 2.88E-02 | ICAM1, IL1B                                                        |
| ethylene diaminetetraacetic acid |       | chemical drug                   |          |      | 2.88E-02 | BCL2A1, IL1B                                                       |
| emolcan                          |       | chemical drug                   |          |      | 2.88E-02 | FAS, IL1B                                                          |
| isatorbaine                      |       | chemical reagent                |          |      | 2.88E-02 | CD40, CD86                                                         |
| cyclo maltodextrin               |       | chemical drug                   |          |      | 2.88E-02 | CSF3, IL1B                                                         |
| topiramate                       |       | chemical drug                   |          |      | 2.88E-02 | CASP3, IL1B                                                        |
| CNR1                             |       | G-protein coupled receptor      | 0.420    | bias | 2.88E-02 | BMP2, BMP4, Ccl2, Ccl8, CORO2A, NOD2, PTK2B                        |
| ZAP70                            |       | kinase                          | 1.982    | bias | 3.04E-02 | ALAS1, ANG, CCR7, CYBA                                             |
| ELK1                             |       | transcription regulator         | 1.951    | bias | 3.04E-02 | BMP2, FOSL1, JUN, RUNX2                                            |
| Pin                              |       | other                           |          |      | 3.04E-02 | APOA1, RACK1, RALA, RRAS                                           |
| FBXO32                           |       | enzyme                          | 1.109    |      | 3.04E-02 | IL1B, KRT19, OAT, SOD2, Tcf7                                       |
| 3M4011                           |       | chemical reagent                |          |      | 3.05E-02 | CD40, CD83, CD86                                                   |
| MALAT1                           |       | other                           |          |      | 3.05E-02 | Ccl2, FRMD8, Glycam1                                               |
| KEAP1                            |       | transcription regulator         |          |      | 3.05E-02 | GSTP1, IL1B, NQO1                                                  |
| PDPK1                            |       | kinase                          |          |      | 3.05E-02 | CCR7, IL1B, SERPINE1                                               |
| TMMP1                            |       | cytokine                        |          |      | 3.05E-02 | AGALY, CD40, CD44                                                  |
| lactic acid                      |       | chemical - endogenous mamma     |          |      | 3.05E-02 | CXCL12, IL1B, MRC1                                                 |
| batifomycin A1                   |       | chemical drug                   |          |      | 3.05E-02 | CD40, CD8, NFKBIA                                                  |
| TGFB3                            |       | growth factor                   | 1.709    | bias | 3.15E-02 | ADAM19, GATA3, JUN, LTBP2, SERPINE1, SERPINE2                      |
| Wium                             |       | chemical drug                   | -0.447   |      | 3.18E-02 | CAMK4, CASP3, FAS, JUN, NCS1                                       |
| FBXW7                            |       | enzyme                          | -0.577   | bias | 3.21E-02 | HSPB1, JUN, NQO1, SERPINE1                                         |
| POU2AF1                          |       | transcription regulator         |          |      | 3.21E-02 | BAGALT1, CD86, ID3, LCK                                            |
| cadmium chloride                 |       | chemical toxicant               |          |      | 3.21E-02 | CXCL12, HSPB1, JUN, KLR3                                           |
| Secretase gamma                  |       | complex                         |          |      | 3.29E-02 | BATF, CD83, CD86                                                   |
| ZBED6                            |       | transcription regulator         |          |      | 3.29E-02 | CRM1, UPP1, WWC1                                                   |
| QHRNA7                           |       | transmembrane receptor          |          |      | 3.29E-02 | Ccl2, ID1, IL1B                                                    |
| ANXA2                            |       | other                           |          |      | 3.29E-02 | ANG, FAS, JUN                                                      |
| DNASE2                           |       | enzyme                          |          |      | 3.29E-02 | CP, Hamp/Hamp2, Mef44b, (includes others)                          |
| SELP                             |       | transmembrane receptor          |          |      | 3.29E-02 | BCL2A1, BST1, IL1B                                                 |
| PRMT1                            |       | enzyme                          |          |      | 3.29E-02 | FTHL, FTL, MRC1                                                    |
| ZBTB7B                           |       | transcription regulator         |          |      | 3.29E-02 | CD8A, GATA3, KLF4                                                  |
| PLAT                             |       | peptidase                       |          |      | 3.29E-02 | IL1B, JUN, SERPINE1                                                |
| TYK2                             |       | kinase                          |          |      | 3.29E-02 | CSF3, Hamp/Hamp2, IL1B                                             |
| CDC42                            |       | enzyme                          |          |      | 3.29E-02 | CASP3, CD86, JUN                                                   |
| MEIS1                            |       | transcription regulator         |          |      | 3.29E-02 | CHD9, FLT3, RUNX2                                                  |

|                                                  |       |                               |           |        |      |          |                                                                           |
|--------------------------------------------------|-------|-------------------------------|-----------|--------|------|----------|---------------------------------------------------------------------------|
| S-nitroso-N-acetylpenicillamine                  |       | chemical reagent              |           |        |      | 3,29E-02 | CXCL12,FAS,PRKG1                                                          |
| glycochenodeoxycholate                           |       | chemical - endogenous mammal  |           |        |      | 3,31E-02 | BCL2A1,BIRC3                                                              |
| MEG3                                             |       | other                         |           |        |      | 3,31E-02 | GDF15,JUN                                                                 |
| Rac                                              |       | group                         |           |        |      | 3,31E-02 | BMP2,CD9                                                                  |
| behacasan                                        |       | chemical drug                 |           |        |      | 3,31E-02 | Cd2,IL1B                                                                  |
| SGRP1                                            |       | phosphatase                   |           |        |      | 3,31E-02 | IL1B,TGFB                                                                 |
| NFKBID                                           |       | transcription regulator       |           |        |      | 3,31E-02 | CD86,CD9                                                                  |
| TNFAIP6L2                                        |       | other                         |           |        |      | 3,31E-02 | Cd2,IL1B                                                                  |
| CBS/CBSL                                         |       | enzyme                        |           |        |      | 3,31E-02 | APOA1,CASP3                                                               |
| TAC4                                             |       | other                         |           |        |      | 3,31E-02 | CD86,IL1B                                                                 |
| COX4I1                                           |       | enzyme                        |           |        |      | 3,31E-02 | SLC22A3,TSPAN8                                                            |
| SRSF3                                            |       | other                         |           |        |      | 3,31E-02 | CD44,JUN                                                                  |
| PIAS4                                            |       | transcription regulator       |           |        |      | 3,31E-02 | IL1B,SERPINE1                                                             |
| ATXN7                                            |       | other                         |           |        |      | 3,31E-02 | BASP1,Marcks                                                              |
| CSF3R                                            |       | transmembrane receptor        |           |        |      | 3,31E-02 | CD14,CXCL12                                                               |
| ACVR1B                                           |       | kinase                        |           |        |      | 3,31E-02 | KLF4,SERPINE1                                                             |
| CSAR2                                            |       | G-protein coupled receptor    |           |        |      | 3,31E-02 | Cd2,CSF3                                                                  |
| NPFF                                             |       | other                         |           |        |      | 3,31E-02 | CEBPA,ID3                                                                 |
| ST14                                             |       | peptidase                     |           |        |      | 3,31E-02 | ICAM1,IL1B                                                                |
| ebselen                                          |       | chemical drug                 |           |        |      | 3,31E-02 | ICAM1,IL1B                                                                |
| diato-lactacyclin beta-lactone                   |       | chemical - protease inhibitor |           |        |      | 3,31E-02 | GSTP1,MAPK6                                                               |
| N-(3-oxododecanoyl)-homoserine dimethyl fumarate |       | chemical reagent              |           |        |      | 3,31E-02 | CSF1,IL1B                                                                 |
| polyamides                                       |       | chemical - other              |           |        |      | 3,31E-02 | CCR7,JUN                                                                  |
| nickel chloride                                  |       | chemical toxicant             |           |        |      | 3,31E-02 | CD4,CEBPA                                                                 |
| spemine                                          |       | chemical - endogenous mammal  |           |        |      | 3,31E-02 | IL1B,JUN                                                                  |
| anti-benzo(a)pyrene-diol-epoxide                 |       | chemical toxicant             |           |        |      | 3,31E-02 | IL1B,RUNX2                                                                |
| bochanin A                                       |       | chemical toxicant             |           |        |      | 3,31E-02 | GADD45B,JUN                                                               |
| noscapine                                        |       | chemical drug                 |           |        |      | 3,31E-02 | CD86,RUNX2                                                                |
| cyproterone acetate                              |       | chemical drug                 |           |        |      | 3,31E-02 | BIRC3,ICAM1                                                               |
| MAPK3                                            |       | kinase                        | 0,000     | bias   |      | 3,32E-02 | GAP43,KLK3                                                                |
| HNRNPA2B1                                        |       | other                         |           |        |      | 3,38E-02 | B4GALT1,BMP4,CD86,FOSL1,JUN                                               |
| 5-hydroxytryptamine                              |       | chemical - endogenous mammal  | 1,954     | bias   |      | 3,39E-02 | CP,GDF15,JUP,MEIS1,PLCB4,SEMA3B,SYT1                                      |
| oxalipatin                                       |       | chemical drug                 |           |        |      | 3,39E-02 | APBB1P,ICAM1,IL1B,PLN3,RUNX2,SERPINE1                                     |
| ISL1                                             |       | transcription regulator       | 1,387     |        |      | 3,47E-02 | CASP3,FAS,GAP43,GDF15                                                     |
| NYFA                                             |       | transcription regulator       | 2,000     | bias   |      | 3,47E-02 | BMP4,CCKAR,IL1B,LILRB3,PTRT                                               |
| USP22                                            |       | peptidase                     | -0,163    |        |      | 3,48E-02 | CCNA2,FTH1,GADD45B,ICAM1,JUN                                              |
| SETD2                                            |       | enzyme                        |           |        |      | 3,55E-02 | BCL11A,Cd44,GM7094,GATA3,IFI16,IL1B,JUN,LAG3,OASL,PRKG1,PTPRK             |
| ABCG1                                            |       | transporter                   |           |        |      | 3,55E-02 | BCL2A1,CSF2RB,MRC1                                                        |
| PRKCO                                            |       | kinase                        |           |        |      | 3,55E-02 | ANG,JUN,SERPINE1                                                          |
| formaldehyde                                     |       | chemical - endogenous mammal  |           |        |      | 3,55E-02 | Cd2,CSF3,IL1B                                                             |
| methylnitrosourea                                |       | chemical toxicant             |           |        |      | 3,55E-02 | CD44,FOSL1,GATA3                                                          |
| phorbol 12,13-dibutyrate                         |       | chemical - endogenous non-mar |           |        |      | 3,55E-02 | FOSL1,IL1B,JUN                                                            |
| AIRE                                             |       | transcription regulator       |           |        |      | 3,55E-02 | GSTP1,IDI1,JUN                                                            |
| urolic acid                                      |       | chemical drug                 |           |        |      | 3,58E-02 | APOA1,Cd2,SERPINE1                                                        |
| SBD5                                             |       | other                         |           |        |      | 3,58E-02 | AKR1B10,BMP2,BMP4,KLK3                                                    |
| MAPT                                             |       | other                         |           |        |      | 3,58E-02 | CASP3,GDF15,IL1B,SOD2                                                     |
| MAPK4                                            |       | kinase                        | Inhibited | -2,449 | bias | 3,64E-02 | GADD45B,GAP43,IDI1,IFI16,ZNRF1                                            |
| BDNF                                             |       | growth factor                 | 1,779     | bias   |      | 3,64E-02 | ANXA6,BASP1,C1R,CASP3,GSTP1,HK1,IL1B,JUN,Prss1 (includes others),SERPINE1 |
| STAT5B                                           |       | transcription regulator       | 0,302     |        |      | 3,64E-02 | ALDH3B1,CEBPA,H6PD,MGLL,PLCB4,ST3GAL4                                     |
| LtH                                              |       | complex                       | 0,911     | bias   |      | 3,64E-02 | AC017,BMP2,CASP3,CAV2,CP,FTL,GAP43,JUN,SEMA3E,SOD2                        |
| cyclic GMP                                       |       | chemical - endogenous mammal  |           |        |      | 3,70E-02 | HR23,FAS,CASP3,FAS,GADD45B,Glycam1,GSTP1,Hamp,Hamp2,KRT19,NQO1            |
| fluoride                                         |       | chemical - endogenous mammal  |           |        |      | 3,72E-02 | DHR53,HK2,MAPK6,PLN3,RUNX2,SOD2,TNFAIP3,TNFRSF12A,UPP1,VCL                |
| tenafamib                                        |       | chemical drug                 |           |        |      | 3,77E-02 | SERPINE1,VCL                                                              |
| PfAFR-RXRa                                       |       | complex                       |           |        |      | 3,77E-02 | FAS,RUNX2                                                                 |
| CLCN5                                            |       | ion channel                   |           |        |      | 3,77E-02 | BCL2A1,BIRC3                                                              |
| IGFBP7                                           |       | transporter                   |           |        |      | 3,77E-02 | APOA1,NFKBIA                                                              |
| TAP1                                             |       | transporter                   |           |        |      | 3,77E-02 | Cd2,SLC34A2                                                               |
| AIMF1                                            |       | cytokine                      |           |        |      | 3,77E-02 | CASP3,SOD2                                                                |
| PNN                                              |       | other                         |           |        |      | 3,77E-02 | HLA-A,IL1B                                                                |
| CAPN3                                            |       | peptidase                     |           |        |      | 3,77E-02 | ICAM1,IL1B                                                                |
| SLC2A1                                           |       | transporter                   |           |        |      | 3,77E-02 | GDF15,JUN                                                                 |
| BOKRB2                                           |       | G-protein coupled receptor    |           |        |      | 3,77E-02 | FTH1,SOD2                                                                 |
| TREX1                                            |       | enzyme                        |           |        |      | 3,77E-02 | NQO1,SERPINE1                                                             |
| PARK7                                            |       | enzyme                        |           |        |      | 3,77E-02 | CD44,ICAM1                                                                |
| PDE5A                                            |       | enzyme                        |           |        |      | 3,77E-02 | IF116,OASL                                                                |
| SPIIN1                                           |       | other                         |           |        |      | 3,77E-02 | ICAM1,SOD2                                                                |
| L-685,458                                        |       | chemical - protease inhibitor |           |        |      | 3,77E-02 | IL1B,PRKG1                                                                |
| Mn(II)-tetrakis-(4-benzoic acid)                 |       | chemical reagent              |           |        |      | 3,77E-02 | PIR7,TGFB                                                                 |
| lauric acid                                      |       | chemical - endogenous mammal  |           |        |      | 3,77E-02 | IDI1,PTPRK                                                                |
| IL1R1                                            |       | transmembrane receptor        | 1,718     | bias   |      | 3,77E-02 | CD14,SERPINE1                                                             |
| FLI1                                             |       | transcription regulator       | 1,969     | bias   |      | 3,77E-02 | CD40,CD86                                                                 |
| 8-hydroxyguanosine 3' 5'-cyclic n                |       | chemical - kinase inhibitor   |           |        |      | 3,77E-02 | Cd2,CXCL12,ICAM1,IL1B                                                     |
| TARDBP                                           |       | transcription regulator       |           |        |      | 3,77E-02 | Cd2,CSF3,CXCR3,RAK1                                                       |
| IGFBP3                                           |       | other                         |           |        |      | 3,81E-02 | BMP2,CDBA,SLC12A4                                                         |
| GTF2B                                            |       | transcription regulator       |           |        |      | 3,81E-02 | CASP3,Cd2,IL1B                                                            |
| parthenolide                                     |       | chemical drug                 |           |        |      | 3,81E-02 | ICAM1,IL1B,SERPINE1                                                       |
| ZFXH3                                            |       | transcription regulator       |           |        |      | 3,81E-02 | BCL2A1,NFKBIA,TNFAIP3                                                     |
| STK11                                            |       | kinase                        | -0,711    |        |      | 3,81E-02 | Cd2,IL1B,SOD2                                                             |
| 3-deazaneplanocin                                |       | chemical drug                 | 0,687     | bias   |      | 3,93E-02 | APOA1,GSTP1,HLA-A,ID3,Nes                                                 |
| UCHL1                                            |       | peptidase                     | 1,000     |        |      | 3,94E-02 | ALCAM,Cd2,CCNA2,CSF3,DOCK4,FOSL1,GADD45B,IDI1,RASGRP1,SERPINE1            |
| QSKOB                                            |       | kinase                        | 2,433     |        |      | 3,96E-02 | FAS,KLF6,LAMB3,NOTCH2                                                     |
| SOX4                                             |       | transcription regulator       | 2,813     | bias   |      | 3,96E-02 | ANXA6,DOCK10,MAPK6,SH2D4                                                  |
| POU2F2                                           |       | transcription regulator       | 2,000     | bias   |      | 3,96E-02 | BCL2A1,BIRC3,Cd2,IL1B,NFKBIZ,SERPINE1                                     |
| flutamide                                        |       | chemical drug - other         | -0,784    | bias   |      | 4,05E-02 | Z610035D17Rk,CD2,LCK,PPIC,RNASE4,SERPINE2,TAX1BP3,TIAM1                   |
| phorbol esters                                   |       | chemical - other              | 2,219     | bias   |      | 4,09E-02 | DEPP1,FJX1,JUN,LCK,TNFRSF12A                                              |
| 6-hydroxydopamine                                |       | chemical toxicant             | 1,980     | bias   |      | 4,09E-02 | B4GALT1,CASP3,Cd2,IL6ST,NQO1                                              |
| RNASE2                                           |       | enzyme                        |           |        |      | 4,09E-02 | CD44,HK2,IL1B,JUN,SOD2                                                    |
| TANK                                             |       | other                         |           |        |      | 4,09E-02 | CASP3,GAP43,IL1B,JUN,SOD2                                                 |
| CAMK4                                            | 1,814 | kinase                        |           |        |      | 4,09E-02 | CD83,CD86,CSF1                                                            |
| CD4                                              |       | transmembrane receptor        |           |        |      | 4,09E-02 | NFKBIZ,Vnn3,ZC3H12A                                                       |
| THBS1                                            |       | other                         |           |        |      | 4,09E-02 | CAMK4,CSPR1,JUN                                                           |
| POSTN                                            |       | other                         |           |        |      | 4,09E-02 | FAS,IDI1,LCK                                                              |
| diphosphoryl lipid A                             |       | chemical toxicant             |           |        |      | 4,09E-02 | Cd2,IL1B,LRP1                                                             |
| gentamicin C1                                    |       | chemical drug                 |           |        |      | 4,10E-02 | Cd2,CLCA1,RUNX2                                                           |
| syngin                                           |       | chemical - endogenous non-mar |           |        |      | 4,10E-02 | IL1B                                                                      |
| Cop9 Signaosome                                  |       | complex                       |           |        |      | 4,10E-02 | CD44                                                                      |
| CD8                                              |       | complex                       |           |        |      | 4,10E-02 | IL1B                                                                      |
| Pdgfra-Pdgfrb                                    |       | complex                       |           |        |      | 4,10E-02 | LCK                                                                       |
| endrin                                           |       | chemical toxicant             |           |        |      | 4,10E-02 | CSF1                                                                      |
| enkephalin, methionine                           |       | biologic drug                 |           |        |      | 4,10E-02 | CEBPA                                                                     |
| T-type Calcium Channel                           |       | complex                       |           |        |      | 4,10E-02 | MRC1                                                                      |
| Rgs15a-ps4                                       |       | other                         |           |        |      | 4,10E-02 | ENPP1                                                                     |
| MBN3                                             |       | other                         |           |        |      | 4,10E-02 | NFKBIA                                                                    |
| SLC27A4                                          |       | transporter                   |           |        |      | 4,10E-02 | CD44                                                                      |
| ADRM1                                            |       | other                         |           |        |      | 4,10E-02 | CEBPA                                                                     |
| POPD2                                            |       | other                         |           |        |      | 4,10E-02 | NFKBIA                                                                    |
| SUCNR1                                           |       | G-protein coupled receptor    |           |        |      | 4,10E-02 | IL1B                                                                      |
| Sin3a5                                           |       | other                         |           |        |      | 4,10E-02 | IL1B                                                                      |
| SLC9A9                                           |       | transporter                   |           |        |      | 4,10E-02 | KLF4                                                                      |
| GSTZ1                                            |       | enzyme                        |           |        |      | 4,10E-02 | FTH1                                                                      |
| Hs3                                              |       | other                         |           |        |      | 4,10E-02 | NQO1                                                                      |
| CIOL4                                            |       | other                         |           |        |      | 4,10E-02 | PRDM2                                                                     |
| GPR4                                             |       | G-protein coupled receptor    |           |        |      | 4,10E-02 | CEBPA                                                                     |
| LBH                                              |       | transcription regulator       |           |        |      | 4,10E-02 | ICAM1                                                                     |
| METTL8                                           |       | enzyme                        |           |        |      | 4,10E-02 | IL1B                                                                      |
| BATF2                                            |       | other                         |           |        |      | 4,10E-02 | CEBPA                                                                     |
| lumycyclamine                                    |       | chemical - endogenous mammal  |           |        |      | 4,10E-02 | JUN                                                                       |
| VANGL2                                           |       | other                         |           |        |      | 4,10E-02 | CLDN4                                                                     |
| CTDSP12                                          |       | phosphatase                   |           |        |      | 4,10E-02 | SDC4                                                                      |
| SV2A                                             |       | transporter                   |           |        |      | 4,10E-02 | IDI1                                                                      |
| Rael1a                                           |       | other                         |           |        |      | 4,10E-02 | SYT1                                                                      |
| AKNA                                             |       | transcription regulator       |           |        |      | 4,10E-02 | HLA-A                                                                     |
| ginkgetin                                        |       | chemical - endogenous non-mar |           |        |      | 4,10E-02 | CD40                                                                      |
| HIP1                                             |       | other                         |           |        |      | 4,10E-02 | CASP3                                                                     |
| LY 518674                                        |       | chemical drug                 |           |        |      | 4,10E-02 | KLK3                                                                      |
| Inflammasome (Nalp3, Asc, Ca                     |       | complex                       |           |        |      | 4,10E-02 | APOA1                                                                     |
| ETV7                                             |       | transcription regulator       |           |        |      | 4,10E-02 | IL1B                                                                      |
| clusterin antisense oligonucleo                  |       | biologic drug                 |           |        |      | 4,10E-02 | BMP6                                                                      |
| AP1M1                                            |       | transporter                   |           |        |      | 4,10E-02 | KLK3                                                                      |
| FAIM2                                            |       | other                         |           |        |      | 4,10E-02 | HLA-A                                                                     |
| IVNS1ABP                                         |       | other                         |           |        |      | 4,10E-02 | CASP3                                                                     |
| HLTF                                             |       | transcription regulator       |           |        |      | 4,10E-02 | SOD2                                                                      |
| ZNF224                                           |       | transcription regulator       |           |        |      | 4,10E-02 | SERPINE1                                                                  |
| CELA1                                            |       | peptidase                     |           |        |      | 4,10E-02 | TNFAIP3                                                                   |
| cyprioxazole                                     |       | chemical drug                 |           |        |      | 4,10E-02 | HLA-A                                                                     |
| MLIP                                             |       | other                         |           |        |      | 4,10E-02 | GADD45B                                                                   |
| CALU                                             |       | other                         |           |        |      | 4,10E-02 | HK1                                                                       |
| NMB                                              |       | other                         |           |        |      | 4,10E-02 | GDF15                                                                     |
| LAMA3                                            |       | other                         |           |        |      | 4,10E-02 | JUN                                                                       |
| ARIH2                                            |       | enzyme                        |           |        |      | 4,10E-02 | IL1B                                                                      |
| mir-338                                          |       | microRNA                      |           |        |      | 4,10E-02 | IL1B                                                                      |
| miR-483-5p (miRNAs w/secd A                      |       | mature microRNA               |           |        |      | 4,10E-02 | IL1B                                                                      |
| mir-652                                          |       | microRNA                      |           |        |      | 4,10E-02 | IL1B                                                                      |
| MIR585                                           |       | microRNA                      |           |        |      | 4,10E-02 | IL1B                                                                      |
| miR-1298-5p (and other miRNA                     |       | mature microRNA               |           |        |      | 4,10E-02 | IL1B                                                                      |
| Zingiber officiale ginger extract                |       | chemical drug                 |           |        |      | 4,10E-02 | IL1B                                                                      |
| NUBP1                                            |       | other                         |           |        |      | 4,10E-02 | FTH1                                                                      |
| HIF1A-AS1                                        |       | other                         |           |        |      | 4,10E-02 | CASP3                                                                     |

|                                  |                                |        |      |          |                                                                     |  |
|----------------------------------|--------------------------------|--------|------|----------|---------------------------------------------------------------------|--|
| N-acetylcysteine                 | chemical - endogenous mammal   |        |      | 4.10E-02 | IL1B                                                                |  |
| BORCS3-4MEF2B                    | transcription regulator        |        |      | 4.10E-02 | JUN                                                                 |  |
| STK38L                           | kinase                         |        |      | 4.10E-02 | YAP1                                                                |  |
| NBR1                             | other                          |        |      | 4.10E-02 | GATA3                                                               |  |
| abiraterone                      | chemical drug                  |        |      | 4.10E-02 | KLK3                                                                |  |
| NOXO1                            | other                          |        |      | 4.10E-02 | SDO2                                                                |  |
| IFB3                             | enzyme                         |        |      | 4.10E-02 | HLA-A                                                               |  |
| SIGLEC11                         | other                          |        |      | 4.10E-02 | IL1B                                                                |  |
| OSTF1                            | transcription regulator        |        |      | 4.10E-02 | RUNX2                                                               |  |
| FGB                              | other                          |        |      | 4.10E-02 | ICAM1                                                               |  |
| poly-L-glutamic acid-peptoid 1   | chemical reagent               |        |      | 4.10E-02 | Cd2                                                                 |  |
| cyclo[Asp-GRHLLIKLAKLA           | chemical reagent               |        |      | 4.10E-02 | CASP3                                                               |  |
| SLC7A11                          | transporter                    |        |      | 4.10E-02 | IL1B                                                                |  |
| VANGL1                           | other                          |        |      | 4.10E-02 | JUN                                                                 |  |
| PLEKHA1                          | other                          |        |      | 4.10E-02 | CD86                                                                |  |
| IRG2                             | transcription regulator        |        |      | 4.10E-02 | SERPINE1                                                            |  |
| RBM3                             | other                          |        |      | 4.10E-02 | CD44                                                                |  |
| MYBPC1                           | other                          |        |      | 4.10E-02 | Cd2                                                                 |  |
| CD86                             | other                          |        |      | 4.10E-02 | IL1B                                                                |  |
| PLEKHA2                          | other                          |        |      | 4.10E-02 | CD86                                                                |  |
| PATZ1                            | transcription regulator        |        |      | 4.10E-02 | KLK3                                                                |  |
| ENC1                             | peptidase                      |        |      | 4.10E-02 | NOO1                                                                |  |
| FOXO1                            | transcription regulator        |        |      | 4.10E-02 | SDC1                                                                |  |
| DRP2                             | other                          |        |      | 4.10E-02 | DMD                                                                 |  |
| FGF5                             | growth factor                  |        |      | 4.10E-02 | CSF3                                                                |  |
| SMC1A                            | transporter                    |        |      | 4.10E-02 | POLE4                                                               |  |
| FRAT1                            | other                          |        |      | 4.10E-02 | JUN                                                                 |  |
| 14,15-epoxyelocosa-5(Z)-enoic a  | chemical reagent               |        |      | 4.10E-02 | Cd2                                                                 |  |
| IPD9                             | transporter                    |        |      | 4.10E-02 | PTK2B                                                               |  |
| nitrosonifedipine                | chemical reagent               |        |      | 4.10E-02 | ICAM1                                                               |  |
| CRTPA                            | other                          |        |      | 4.10E-02 | SERPINE1                                                            |  |
| Acp5                             | phosphatase                    |        |      | 4.10E-02 | IL1B                                                                |  |
| SRI                              | other                          |        |      | 4.10E-02 | Cd2                                                                 |  |
| APOC1                            | transporter                    |        |      | 4.10E-02 | CASP3                                                               |  |
| CDK11B                           | kinase                         |        |      | 4.10E-02 | KLK3                                                                |  |
| NLRP1                            | other                          |        |      | 4.10E-02 | IL1B                                                                |  |
| RNF11                            | enzyme                         |        |      | 4.10E-02 | SERPINE1                                                            |  |
| CLEC2D                           | transmembrane receptor         |        |      | 4.10E-02 | CD83                                                                |  |
| QPS6                             | other                          |        |      | 4.10E-02 | SPN                                                                 |  |
| ZFYVE16                          | transporter                    |        |      | 4.10E-02 | SERPINE1                                                            |  |
| N-acetyl-L-tyrosyl-L-cysteine-am | chemical reagent               |        |      | 4.10E-02 | XDH                                                                 |  |
| ATB-346                          | chemical drug                  |        |      | 4.10E-02 | IL1B                                                                |  |
| E-CADHERIN                       | chemical reagent               |        |      | 4.10E-02 | BCL2A1                                                              |  |
| verticillin A                    | chemical reagent               |        |      | 4.10E-02 | FAS                                                                 |  |
| hydroxyl radical                 | chemical toxicant              |        |      | 4.10E-02 | KLK4                                                                |  |
| trimellitic anhydride            | chemical toxicant              |        |      | 4.10E-02 | IL1B                                                                |  |
| ama-crme                         | chemical drug                  |        |      | 4.10E-02 | JUN                                                                 |  |
| apocapsale                       | chemical drug                  |        |      | 4.10E-02 | SERPINE1                                                            |  |
| methiothepin                     | chemical drug                  |        |      | 4.10E-02 | SERPINE1                                                            |  |
| sibutramine                      | chemical drug                  |        |      | 4.10E-02 | SERPINE1                                                            |  |
| 2,5-hexanedione                  | chemical toxicant              |        |      | 4.10E-02 | FAS                                                                 |  |
| hexaarginine-neomycin B con      | chemical reagent               |        |      | 4.10E-02 | CD8A                                                                |  |
| oxazepam                         | chemical drug                  |        |      | 4.10E-02 | GADD45B                                                             |  |
| 3,3'-aminodipionitrile           | chemical toxicant              |        |      | 4.10E-02 | Cd2                                                                 |  |
| gliclazide                       | chemical drug                  |        |      | 4.10E-02 | SLC2A3                                                              |  |
| thalcone-24                      | chemical reagent               |        |      | 4.10E-02 | BIRC3                                                               |  |
| uchovananthin                    | chemical drug                  |        |      | 4.10E-02 | JAG1                                                                |  |
| terpenoid                        | chemical - endogenous mammal   |        |      | 4.10E-02 | LRP1                                                                |  |
| urushiol                         | chemical - endogenous non-mar  |        |      | 4.10E-02 | IL1B                                                                |  |
| phenol                           | chemical - endogenous mammal   |        |      | 4.10E-02 | IL1B                                                                |  |
| sodium fluoride                  | chemical drug                  |        |      | 4.10E-02 | ICAM1                                                               |  |
| cation                           | chemical - other               |        |      | 4.10E-02 | GS TP1                                                              |  |
| echium oil                       | chemical drug                  |        |      | 4.10E-02 | IL1B                                                                |  |
| procatenol                       | chemical drug                  |        |      | 4.10E-02 | ICAM1                                                               |  |
| Z-VYAD-FMK                       | chemical reagent               |        |      | 4.10E-02 | IL1B                                                                |  |
| venetoprin                       | chemical drug                  |        |      | 4.10E-02 | YAP1                                                                |  |
| KT 5826                          | chemical - kinase inhibitor    |        |      | 4.10E-02 | CD14                                                                |  |
| aluminum                         | chemical drug                  |        |      | 4.10E-02 | RUNX2                                                               |  |
| typhostin B56                    | chemical - kinase inhibitor    |        |      | 4.10E-02 | ICAM1                                                               |  |
| tibolone                         | chemical drug                  |        |      | 4.10E-02 | SERPINE1                                                            |  |
| bunaiside                        | chemical drug                  |        |      | 4.10E-02 | ICAM1                                                               |  |
| fluorocitric acid                | chemical reagent               |        |      | 4.10E-02 | IL1B                                                                |  |
| 1-phenazinecarboxylic acid       | chemical - endogenous non-mar  |        |      | 4.10E-02 | ICAM1                                                               |  |
| HOXD10                           | transcription regulator        | 0.000  |      | 4.17E-02 | CD44,ICAM1,NOS1,SERPINE1                                            |  |
| ptenone                          | chemical toxicant              | 0.832  |      | 4.17E-02 | BIRC3,CASP3,IL1B,SDO2                                               |  |
| pirofenone beta-1a               | biologic drug                  |        |      | 4.17E-02 | GADD45B,GSTP1,IL1R3,MAL,NFKBIA,SERPIN1                              |  |
| CREM                             | transcription regulator        | 1.131  |      | 4.18E-02 | CAMK4,CD86,CD8A,GADD45B,Marcks,MEST,Tpm1                            |  |
| aldosterone                      | chemical - endogenous mammal   | 2.578  | bias | 4.18E-02 | BMP2,Cd2,CYBA,ICAM1,NFKBIA,SERPINE1,ZBTB16                          |  |
| apothione B                      | chemical drug                  |        |      | 4.25E-02 | FAS,SPN                                                             |  |
| eluretinib                       | chemical drug                  |        |      | 4.25E-02 | JUN,RUNX2                                                           |  |
| DPH5                             | enzyme                         |        |      | 4.25E-02 | IL1B,NFKBIA                                                         |  |
| MDK                              | growth factor                  |        |      | 4.25E-02 | Caln1,Cd2                                                           |  |
| NUP62                            | transporter                    |        |      | 4.25E-02 | PERP,WWC1                                                           |  |
| LY96                             | transmembrane receptor         |        |      | 4.25E-02 | CD40,CD86                                                           |  |
| me-204                           | microRNA                       |        |      | 4.25E-02 | IL1B,RUNX2                                                          |  |
| FCGR1A                           | transmembrane receptor         |        |      | 4.25E-02 | CSF1,IL1B                                                           |  |
| HDAC9                            | transcription regulator        |        |      | 4.25E-02 | CEBPA,JUN                                                           |  |
| STIM1                            | ion channel                    |        |      | 4.25E-02 | GSTO1,NQO1                                                          |  |
| 10-oxotrolate                    | chemical - endogenous mammal   |        |      | 4.25E-02 | Cd2,ICAM1                                                           |  |
| PR2                              | transmembrane receptor         |        |      | 4.25E-02 | FAS,IL1B                                                            |  |
| BCL10                            | transcription regulator        |        |      | 4.25E-02 | CD44,TNFAIP3                                                        |  |
| CNR2                             | G-protein coupled receptor     |        |      | 4.25E-02 | Cd2,IL1B                                                            |  |
| Cux1                             | transcription regulator        |        |      | 4.25E-02 | Cd8,CD8A                                                            |  |
| 101_10 peptide                   | chemical reagent               |        |      | 4.25E-02 | Cd2,IL1B                                                            |  |
| 3-aminobenzamide                 | chemical toxicant              |        |      | 4.25E-02 | ICAM1,IL1B                                                          |  |
| 2-acetylaminofluorene            | chemical toxicant              |        |      | 4.25E-02 | JAG1,NOTCH2                                                         |  |
| allyl sulfide                    | chemical drug                  |        |      | 4.25E-02 | CASP3,GSTA3                                                         |  |
| concanamycin A                   | chemical drug                  |        |      | 4.25E-02 | ICAM1,NFKBIA                                                        |  |
| neustatin                        | chemical drug                  |        |      | 4.25E-02 | BMP4,KLK4                                                           |  |
| indole                           | chemical - endogenous mammal   |        |      | 4.25E-02 | CGN,TJP3                                                            |  |
| farnesyl pyrophosphate           | chemical - endogenous mammal   |        |      | 4.25E-02 | ICAM1,SERPINE1                                                      |  |
| tetrandrine                      | chemical drug                  |        |      | 4.25E-02 | CASP3,JUN                                                           |  |
| IES                              | transcription regulator        | -1.400 | bias | 4.30E-02 | B3GAT1,CEBPA,CXCL12,GAP43,Nes,OAT,SYT1                              |  |
| arsenic trioxide                 | chemical drug                  | 1.672  |      | 4.34E-02 | BCL2A1,CD44,FAS,FTH1,MAPK4,MAPK6,MCM3,NFKBIA,NQO1,PIR               |  |
| CDKN1A                           | kinase                         | -0.116 | bias | 4.35E-02 | BUB1,CASP3,CNNA2,FAS,IL1B,JAG1,MCM3,SERPINE1,SDO2                   |  |
| rasagiline                       | chemical drug                  |        |      | 4.37E-02 | FAS,Marcks,RACK1                                                    |  |
| NSD2                             | enzyme                         | 0.462  |      | 4.37E-02 | ITGB7,JUN,RRAS                                                      |  |
| KRT14                            | other                          |        |      | 4.37E-02 | CXCL14,GJB2,KRT8                                                    |  |
| APR-246                          | chemical drug                  |        |      | 4.37E-02 | CD81,GADD45B,VCL                                                    |  |
| CIDEc                            | other                          |        |      | 4.37E-02 | Cd2,SDC1,SERPINE1                                                   |  |
| ethylene glycol tetraacetic acid | chemical reagent               |        |      | 4.37E-02 | BIRC3,CD83,CD86                                                     |  |
| NR4A3                            | ligand-dependent nuclear recep |        |      | 4.37E-02 | BIRC3,CEBPA,FBP1,NQO1                                               |  |
| PLN                              | transporter                    |        |      | 4.37E-02 | AP0A1,RACQ1,RALA,RRAS                                               |  |
| 25-hydroxycholesterol            | chemical reagent               | 1.000  |      | 4.37E-02 | FOSL1,IL1B,JUN,NFKBIA                                               |  |
| ATF2                             | transcription regulator        | 1.969  | bias | 4.42E-02 | BCL2A1,CNNA2,IL1RL1,JUN,SDO2                                        |  |
| LIPE                             | enzyme                         |        |      | 4.46E-02 | CEBPA,GP,IL1RL1,JUP,RUNX2,SDC4                                      |  |
| BM1                              | transcription regulator        |        |      | 4.59E-02 | FAS,IKK2,MCM3,SPN                                                   |  |
| FOLR1                            | transporter                    |        |      | 4.59E-02 | BASP1,BIRC3,CD9,CLC1,ST3GAL4                                        |  |
| KLK3                             | transcription regulator        | -1.155 | bias | 4.59E-02 | ALDH3B1,ANXA6,ARHGEF3,GSTP1,ITGB7,LILRB3,NEURL3,PARP3,PDLIM1,PTP42A |  |
| pregnenolone carbonitrile        | chemical reagent               |        |      | 4.67E-02 | ALAS1,HMGCS2,UGT1A7 (includes others)                               |  |
| INPP5D                           | phosphatase                    |        |      | 4.67E-02 | CD86,FAS,IRAK3                                                      |  |
| ATP7B                            | transporter                    |        |      | 4.67E-02 | CP,FABP5,TRIP13                                                     |  |
| SERPINE2                         | other                          | 1.374  |      | 4.67E-02 | Cd2,Cd8,IL1B                                                        |  |
| JAG2                             | growth factor                  |        |      | 4.67E-02 | BMP2,IL1B,JAG1                                                      |  |
| cyclopamine                      | chemical reagent               |        |      | 4.67E-02 | CD14,FAS,SMO                                                        |  |
| ROKi                             | ligand-dependent nuclear recep |        |      | 4.69E-02 | C2B8,GADD45B,GSTP1,IL1B,LPIN2,SLC2A3,ZBTB16                         |  |
| 3-deoxy-2-octulosonic acid(2)k   | chemical - endogenous non-mar  |        |      | 4.75E-02 | Cd2,IL1B                                                            |  |
| pCPT-cAMP                        | chemical - kinase inhibitor    |        |      | 4.75E-02 | JUN,PRKG1                                                           |  |
| Sod                              | group                          |        |      | 4.75E-02 | Cd2,ICAM1                                                           |  |
| Indosan                          | chemical drug                  |        |      | 4.75E-02 | JUN,NQO1                                                            |  |
| Angiotensin II receptor type 1   | group                          |        |      | 4.75E-02 | GAP43,SERPINE1                                                      |  |
| ZC3H14                           | other                          |        |      | 4.75E-02 | BATF,Vmn3                                                           |  |
| PPP1R1B                          | phosphatase                    |        |      | 4.75E-02 | CASP3,CD44                                                          |  |
| SMYD3                            | enzyme                         |        |      | 4.75E-02 | CEBPD,NEURL1                                                        |  |
| HSPB1                            | other                          | 1.504  |      | 4.75E-02 | Cd2,IL1B                                                            |  |
| HCP2                             | transporter                    |        |      | 4.75E-02 | HK2,IL1B                                                            |  |
| TNFRSF21                         | transmembrane receptor         |        |      | 4.75E-02 | CASP3,CD28                                                          |  |
| INHBB                            | growth factor                  |        |      | 4.75E-02 | Hamp/Hamp2,SERPINE1                                                 |  |
| PHB2                             | transcription regulator        |        |      | 4.75E-02 | BMP2,ILGST                                                          |  |
| IL-17i dimer                     | complex                        |        |      | 4.75E-02 | CSF3,IL1B                                                           |  |
| PHLPP1                           | enzyme                         |        |      | 4.75E-02 | CEBPD,Vmn3                                                          |  |
| PSMB8                            | peptidase                      |        |      | 4.75E-02 | NFKBIA,TNFAIP3                                                      |  |
| LBP                              | transporter                    |        |      | 4.75E-02 | CD14,IL1B                                                           |  |
| me-515                           | microRNA                       |        |      | 4.75E-02 | CD44,SERPINE1                                                       |  |
| me-7                             | microRNA                       |        |      | 4.75E-02 | KLK4,SLC2A3                                                         |  |
| LAMA5                            | other                          |        |      | 4.75E-02 | Cd2,CSF3                                                            |  |
| KLK10                            | transcription regulator        |        |      | 4.75E-02 | GATA3,SERPINE1                                                      |  |
| DDX17                            | enzyme                         |        |      | 4.75E-02 | FOSL1,JUN                                                           |  |
| NR200                            | group                          |        |      | 4.75E-02 | JUN,LRP1                                                            |  |
| CCA2                             | other                          |        |      | 4.75E-02 | CASP3,AT52                                                          |  |

|                               |       |                                |           |        |      |          |                                                      |  |
|-------------------------------|-------|--------------------------------|-----------|--------|------|----------|------------------------------------------------------|--|
| GAB1                          | 1.515 | other                          |           |        |      | 4.75E-02 | CASP3,IL1B                                           |  |
| C5                            |       | other                          |           |        |      | 4.75E-02 | Cd2,IL1B                                             |  |
| batimastat                    |       | chemical - protease inhibitor  |           |        |      | 4.75E-02 | ANG,SDC4                                             |  |
| cerulenin                     |       | chemical drug                  |           |        |      | 4.75E-02 | Cd2,IL1B                                             |  |
| pyruvaldehyde                 |       | chemical - endogenous mamma    |           |        |      | 4.75E-02 | ICAM1,NQO1                                           |  |
| bombesin                      |       | chemical - endogenous mamma    |           |        |      | 4.75E-02 | KLK3,ZB1B16                                          |  |
| SMAD2                         |       | transcription regulator        |           | -0.317 | bias | 4.77E-02 | CRISPLD2,GADD45B,Hamp,Hamp2,RUNX2,SERPINE1           |  |
| CD3E                          |       | transmembrane receptor         |           |        |      | 4.81E-02 | FAS,JUN,LCP2,NFKBIA                                  |  |
| SGK1                          |       | kinase                         | Activated | 2.000  | bias | 4.81E-02 | CEBPA,SLC2A3,SLC34A2,SMO                             |  |
| sulindac                      |       | chemical drug                  |           |        |      | 4.81E-02 | CXNA2,IL1B,NQO1,SERPINE1                             |  |
| INS                           |       | other                          |           | 1.432  |      | 4.82E-02 | APOA1,Cd2,FADS3,FAS,FOSL1,ICAM1,JUN                  |  |
| cocaine                       |       | chemical drug                  | Activated | 2.415  | bias | 4.85E-02 | Cd2,FOSL1,GADD45B,ICAM1,JUN,LAMC2,MEST,Tpm1          |  |
| PXR ligand-PXR-Retinoic acid4 |       | complex                        |           |        |      | 4.97E-02 | ALAS1,CYP3A7,UGT1A7 (includes others)                |  |
| FOX P1                        |       | transcription regulator        |           |        |      | 4.97E-02 | DMD,GAP43,JUN                                        |  |
| progesterol                   |       | chemical drug                  |           |        |      | 4.97E-02 | HK2,ICAM1,NFKBIA                                     |  |
| miR-124-3p (and other miRNAs) |       | mature microRNA                | Inhibited | -2.978 | bias | 5.00E-02 | B4GALT1,BTG3,Cd2,CDC47,CEBPA,F11R,JAG1,LITAF,TSC22D4 |  |
| NR3C2                         |       | ligand-dependent nuclear recep |           | 1.954  |      | 5.89E-02 | BCL2A1,BMP4,Cd2,ICAM1,IL1B,SERPINE1                  |  |
| DNMT3A                        |       | enzyme                         | Inhibited | -2.000 |      | 2.09E-01 | BLNK,IRF5,PLCB4,SDC4,Tcf7                            |  |
