# Supplementary material
Source: publisher figshare collection journal article supplement (https://diabetesjournals.figshare.com/articles/dataset/_/22906517)
Supplement: Supplementary file 4 [file 1]

Supplementary Table S2, related to Figure 5, S1, S2, S5 and S7 . List of oligonucleotide used in this study. (To modify for publication)

| Gene Name                                                               | Gene symbol       | Species | Primer                    |
|-------------------------------------------------------------------------|-------------------|---------|---------------------------|
| <i>Cyclophilin</i>                                                      | <i>Cyclo</i>      | Mouse   | ATGGCACTGGCGGCAGGTCC      |
|                                                                         |                   |         | TTGCCATTCTGGACCCAAA       |
| <i>E2f1</i>                                                             | <i>E2f1</i>       | Mouse   | GATCGAAGCTTTAATGGAGCG     |
|                                                                         |                   |         | CCCTTGCTTCAGAGAACAGG      |
| <i>E2f1 Exon3</i>                                                       | <i>E2f1 Exon3</i> | Mouse   | ACAGCTGCAACTGCTTTCGGAG    |
|                                                                         |                   |         | AGCTTGTAGTTGGGTCTCAGGAGG  |
| <i>Paired Box 4</i>                                                     | <i>Pax4</i>       | Mouse   | GTGTACCCTCAGTGCCTTG       |
|                                                                         |                   |         | ATAGGCCTGGGATGAGGTGT      |
| <i>Pancreatic and duodenal homebox 1</i>                                | <i>Pdx1</i>       | Mouse   | ATTGTGCGGTGACCTCGGGC      |
|                                                                         |                   |         | GATGCTGGAGGCTGTGGCG       |
| <i>Aristaless-related homebox</i>                                       | <i>Arx</i>        | Mouse   | GCGGGCTTCCAGAAGACGC       |
|                                                                         |                   |         | CTGGAACCACTGGACTCGG       |
| <i>Homebox protein Nkx2.2</i>                                           | <i>Nkx2.2</i>     | Mouse   | GTGCAGGGAGTATTGGAGGC      |
|                                                                         |                   |         | GAAGGGCCAGAGGAGAGA        |
| <i>Forkhead box protein O1</i>                                          | <i>Foxo1</i>      | Mouse   | TGCCCAACCAAGCTTCCACA      |
|                                                                         |                   |         | TGGACTGCTCCTCAGTCTCTGCT   |
| <i>Insulin1</i>                                                         | <i>Ins1</i>       | Mouse   | GCCAAACAGCAAAGTCCAGG      |
|                                                                         |                   |         | GTTGAAACAATGACCTGCTTGC    |
| <i>Insulin2</i>                                                         | <i>Ins2</i>       | Mouse   | CAGCAAGCAGGAAGCCTATCT     |
|                                                                         |                   |         | CAGGTGGGAACCAAAAGGT       |
| <i>Glucagon</i>                                                         | <i>Gcg</i>        | Mouse   | AGGCCGAGGAAGCGAGACT       |
|                                                                         |                   |         | GGAGCCATCAGCGTGCCTGC      |
| <i>Potassium voltage-gated channel subfamily J member 11</i>            | <i>Kcnj11</i>     | Mouse   | CACAAGCTGGGTTGGGGGCTC     |
|                                                                         |                   |         | TGCCCTCAGCTGGGTTCTGC      |
| <i>Dihydrofolate reductase</i>                                          | <i>Dhfr</i>       | Mouse   | ATGGTTCGACATTGAAGTGCATCG  |
|                                                                         |                   |         | TCTTCTCAGGAATGGAGAACCAGG  |
| <i>Glucokinase</i>                                                      | <i>Gck</i>        | Mouse   | GCTCAGTGAACCCGGTCAAGC     |
|                                                                         |                   |         | TGTGCGCAGCTGCTCTGAGG      |
| <i>v-maf musculoaponeurotic fibrosarcoma oncogene family, protein A</i> | <i>MafA</i>       | Mouse   | CCTGTAGAGGAAGCCGAGGAA     |
|                                                                         |                   |         | CCTCCCCAGTCGAGTATAGC      |
| <i>v-maf musculoaponeurotic fibrosarcoma oncogene family, protein B</i> | <i>MafB</i>       | Mouse   | TTAGCGCAGACAGAGTACCGAAA   |
|                                                                         |                   |         | ATACTCTTACACTCCACCCTCG    |
| <i>Solute carrier family 2 (facilitated glucose transporter)</i>        | <i>Slc2a2</i>     | Mouse   | AACCGGGATGATTGGCATGT      |
|                                                                         |                   |         | GGCGAATTTATCCAGCAGCA      |
| <i>Proprotein convertase subtilisin/kexin type1</i>                     | <i>Pcsk1</i>      | Mouse   | CCGGAGGGCAAGAAGCTGCC      |
|                                                                         |                   |         | TGTTCAAGCCACGTCAACGAT     |
| <i>Proprotein convertase subtilisin/kexin type2</i>                     | <i>Pcsk2</i>      | Mouse   | AAAGATGGCGCTGCAACAAG      |
|                                                                         |                   |         | TTGCCAGTGTGAACAGGT        |
| <i>Proprotein convertase subtilisin/kexin type9</i>                     | <i>Pcsk9</i>      | Mouse   | TTGCAGCAGCTGGAACTT        |
|                                                                         |                   |         | CCGACTGTGATGACCTCTGGA     |
| <i>Urocortin 3</i>                                                      | <i>Ucn3</i>       | Mouse   | TGATGCCACCTACTTCTCTG      |
|                                                                         |                   |         | CTGTGTTGAGGCAGCTGAAG      |
| <i>Hepatocyte nuclear factor 1 homeobox a</i>                           | <i>Hfn1a</i>      | Mouse   | ACCGTACCCGTGGACCTTA       |
|                                                                         |                   |         | CCTGAGATCTACAGCACCTG      |
| <i>Glucagon like peptide 1 receptor promoter</i>                        | <i>Glp1r</i>      | Mouse   | CTGCGGCTCTAAACCTGAG       |
|                                                                         |                   |         | CTGTCTCTTCGCGCTGG         |
| <i>Enhancer of zeste homolog 2 promoter</i>                             | <i>Ezh2</i>       | Mouse   | TTCGGCCCTCTGATTGGAC       |
|                                                                         |                   |         | CATCGCTTTATTATGGCCCC      |
| <i>Cyclin E1 promoter</i>                                               | <i>Ccne1</i>      | Mouse   | GTTCTTAACCTCGGGCCCT       |
|                                                                         |                   |         | CAAGTGGAATGTCAGCAGGG      |
| <i>Intergenic region (Chromosome 7)</i>                                 | <i>Chr7</i>       | Mouse   | ACTCTGCCTGTCAACCTTTT      |
|                                                                         |                   |         | GGTGTCAAGAGAGTGTGGGA      |
| <i>E2F1</i>                                                             | <i>hE2F1</i>      | Human   | ATGGCACTGGCGGCAGGTCC      |
|                                                                         |                   |         | TTGCCATTCTGGACCCAAA       |
| <i>Paired Box 4</i>                                                     | <i>hPAX4</i>      | Human   | AGCAGAGGCACTGGAGAAAGAGTT  |
|                                                                         |                   |         | CAGCTGCATTTCCACTTGAGCTT   |
| <i>Pancreatic and duodenal homebox 1</i>                                | <i>hPDX1</i>      | Human   | CGTCCAGCTGCCTTTCCAT       |
|                                                                         |                   |         | CCGTGAGATGTACTTGTGAATAGGA |
| <i>Aristaless-related homebox</i>                                       | <i>hARX</i>       | Human   | CTGCTGAAACGCAACAGAGGC     |
|                                                                         |                   |         | CTCGGTCAAGTCCAGCCTCATG    |
| <i>v-maf musculoaponeurotic fibrosarcoma oncogene family, protein A</i> | <i>hMAFA</i>      | Human   | TTGTACAGGTCCCGCTCTTT      |
|                                                                         |                   |         | AGCAGAGGCACTGGAGAAAGAGTT  |
| <i>Neurogenic Differentiation</i>                                       | <i>hNEUROD1</i>   | Human   | GCCCCAGGGTTATGAGACTAT     |
|                                                                         |                   |         | GAGAACTGAGACACTCGTCTGT    |
| <i>Insulin</i>                                                          | <i>hINS</i>       | Human   | AGCCTTTGTGAACCAACACC      |
|                                                                         |                   |         | GCTGGTAGAGGGAGCAGATG      |
| <i>Glucagon</i>                                                         | <i>hGCG</i>       | Human   | CATTCACAGGGCACATTAC       |
|                                                                         |                   |         | CGGCCAAGTTCTTCAACAAT      |
