# Supplementary material
Source: publisher figshare collection journal article supplement (https://diabetesjournals.figshare.com/articles/dataset/_/22906517)
Supplement: Supplementary file 5 [file 1]

*Continues on the next page*

| RECOMMENDED INFORMATION                                                                 |                        |      |      |  |  |  |  |  |
|-----------------------------------------------------------------------------------------|------------------------|------|------|--|--|--|--|--|
| Donor cause of death                                                                    | Hémorragie<br>Méningée | AVC  | AVC  |  |  |  |  |  |
| Warm ischaemia time (h)                                                                 | 0                      | 0    | 0    |  |  |  |  |  |
| Cold ischaemia time (h)                                                                 | 3H38                   | 6H20 | 6H35 |  |  |  |  |  |
| Estimated purity (%)                                                                    | 80                     | 80   | 80   |  |  |  |  |  |
| Estimated viability (%)                                                                 | 98,1                   | 93,7 | 95,3 |  |  |  |  |  |
| Total culture time (h) <sup>d</sup>                                                     | 18                     | 18   | 36   |  |  |  |  |  |
| Glucose-stimulated<br>insulin secretion or other<br>functional measurement <sup>e</sup> | 1,18                   | 3,67 | 1,56 |  |  |  |  |  |
| Handpicked to purity?<br>Please select yes/no from<br>drop down list                    | No                     | No   | No   |  |  |  |  |  |
| Additional notes                                                                        |                        |      |      |  |  |  |  |  |

<sup>a</sup>If you have used more than eight islet preparations, please complete additional forms as necessary

<sup>b</sup>For example, IIDP, ECIT, Alberta IsletCore

<sup>c</sup>Please specify the therapy/therapies

<sup>d</sup>Time of islet culture at the isolation centre, during shipment and at the receiving laboratory

<sup>e</sup>Please specify the test and the results
