# Supplementary material
Source: publisher figshare collection journal article supplement (https://diabetesjournals.figshare.com/articles/dataset/_/22906517)
Supplement: Supplementary file 6 [file 1]

Supplementary Table S4, related to Figures 4 and S5. List of transcripts differentially regulated in E2f1beta-/- and E2f1fl/fl pancreatic islets identified by RNA-sequencing and their chromatin state.

|                      | baseMean    | log2FoldChange | lfcSE      | stat       | pvalue     | padj       | ensembl_gene_id          | external_name | tss_chromatin_state |   |                               |
|----------------------|-------------|----------------|------------|------------|------------|------------|--------------------------|---------------|---------------------|---|-------------------------------|
| ENSMUSG000000096515  | 493,7382422 | 25.67664338    | 3.90685555 | 6.57220187 | 4.9577E-11 | 8,2973E-08 | ENSMUSG001glkv14-100     |               |                     | A | Active TSS (-1)               |
| ENSMUSG000000082855  | 15,93590967 | 20.94433456    | 2.81784241 | 7,43275581 | 1,0636E-13 | 3,2634E-10 | ENSMUSG00C1ca1           | N             |                     | B | Active TSS (+1)               |
| ENSMUSG000000076576  | 484,1335785 | 12,46127603    | 2,93493697 | 4,2458411  | 2,1777E-05 | 0,00285572 | ENSMUSG001glkv6-32       |               |                     | C | TSS Flank Cis-reg             |
| ENSMUSG000000059335  | 460,3636887 | 12,38863751    | 3,01346965 | 4,11108753 | 3,9386E-05 | 0,00439385 | ENSMUSG001glkv3-5        |               |                     | D | Proximal Cis-reg/elongation   |
| ENSMUSG000000095630  | 697,2342764 | 11,34603634    | 3,58965915 | 3,1607559  | 0,0015736  | 0,00449198 | ENSMUSG001glkv6-23       |               |                     | E | Proximal Cis-reg/elongation 2 |
| ENSMUSG000000076556  | 75,3728068  | 9,778196893    | 2,77504099 | 5,32362251 | 0,00042569 | 0,02014642 | ENSMUSG001glkv4-57       |               |                     | F | Proximal Cis-reg/elongation 3 |
| ENSMUSG000000095442  | 55,29094767 | 9,331579038    | 1,63397948 | 5,71095239 | 1,1235E-08 | 7,3867E-06 | ENSMUSG001glv1-4         |               |                     | G | Elongation                    |
| ENSMUSG000000056290  | 46,12129767 | 9,263777657    | 1,69696397 | 5,45903024 | 4,7874E-08 | 2,3821E-05 | ENSMUSG00C1Ms44b         | W             |                     | H | distal elongation             |
| ENSMUSG000000021223  | 38,37098841 | 8,772852677    | 1,63515241 | 5,365159   | 8,0878E-08 | 3,7224E-05 | ENSMUSG00C1Papln         | L             |                     | I | distal elongation             |
| ENSMUSG000000023132  | 33,11067298 | 8,59154443     | 1,72616564 | 4,97724218 | 6,4497E-07 | 0,00019465 | ENSMUSG00C1Gzma          | N             |                     | J | Active TES/distal enhancer    |
| ENSMUSG000000093861  | 917,6157178 | 8,246225838    | 2,26741157 | 3,63684561 | 0,000276   | 0,01520599 | ENSMUSG001glkv1-110      |               |                     | K | Bivalent                      |
| ENSMUSG000000053977  | 26,91486277 | 8,240684634    | 1,73174626 | 4,75859819 | 1,9494E-06 | 0,00048498 | ENSMUSG00C1Cdb8          | N             |                     | L | Bivalent H3K4me3 High         |
| ENSMUSG00000106797   | 19,09370507 | 7,797063646    | 1,60276462 | 4,86475903 | 1,146E-06  | 0,00031488 | ENSMUSG00C1Gm42936       |               |                     | M | Bivalent H3K27me3 High        |
| ENSMUSG000000024798  | 17,5269147  | 7,789610914    | 1,67696295 | 4,64507037 | 3,3996E-06 | 0,00073631 | ENSMUSG00C1Hr7           | L             |                     | N | PCg repressed                 |
| ENSMUSG000000041449  | 17,16188954 | 7,64681725     | 2,03317004 | 3,76103183 | 0,00016921 | 0,01090687 | ENSMUSG00C1Serpina3h     | R             |                     | O | PCg repressed 2               |
| ENSMUSG000000007176  | 16,84112609 | 7,616630477    | 2,2050798  | 3,45412918 | 0,00055207 | 0,02410638 | ENSMUSG00C1Apol7e        | P             |                     | P | DNA-meth                      |
| ENSMUSG000000076652  | 16,09520681 | 7,551529017    | 2,26856017 | 3,32877616 | 0,00087228 | 0,0135265  | ENSMUSG001glhv7-3        |               |                     | Q | Mixed PCg/K9                  |
| ENSMUSG000000015619  | 19,53736019 | 7,489807109    | 1,89146109 | 3,95979972 | 7,5013E-05 | 0,00663934 | ENSMUSG00C1Gata3         | M             |                     | R | Mixed PCg/K9                  |
| ENSMUSG000000076522  | 15,27985042 | 7,475498061    | 2,27878601 | 3,28047392 | 0,00103633 | 0,03487899 | ENSMUSG001glkv16-104     |               |                     | S | Heterochromatin               |
| ENSMUSG000000009185  | 14,62071298 | 7,413407455    | 1,80191873 | 4,11417414 | 3,8857E-05 | 0,00438867 | ENSMUSG00C1Cdb8          | N             |                     | T | Heterochromatin 2             |
| ENSMUSG0000000959130 | 13,77127619 | 7,327103007    | 2,14705232 | 3,41263365 | 0,00064338 | 0,02632154 | ENSMUSG001glhv1-39       |               |                     | U | Mixed PR(C2)/K9               |
| ENSMUSG000000083161  | 11,91656623 | 7,289934592    | 1,78717353 | 4,07903007 | 4,5224E-05 | 0,00489749 | ENSMUSG00C1Gm11427       |               |                     | V | ZFP genes + repeats           |
| ENSMUSG000000058891  | 47,19076197 | 7,064185689    | 1,74877593 | 4,17909490 | 3,7459E-05 | 0,00173283 | ENSMUSG00C181000906FQ    | L             |                     | W | quiescent                     |
| ENSMUSG000000022491  | 12,83740959 | 7,224931162    | 2,31028185 | 3,2728646  | 0,00176428 | 0,04797693 | ENSMUSG00C1Glycam1       | I             |                     | X | quiescent 2                   |
| ENSMUSG000000028167  | 9,510678808 | 7,165071738    | 1,87265046 | 3,82616612 | 0,00013015 | 0,00914559 | ENSMUSG00C1Bdh2          | K             |                     |   |                               |
| ENSMUSG000000024211  | 9,201281748 | 7,117088093    | 2,21106263 | 3,21885414 | 0,00128704 | 0,03909966 | ENSMUSG00C1Gm8           | L             |                     |   |                               |
| ENSMUSG000000027379  | 9,406954178 | 6,910462926    | 1,92088394 | 3,59754319 | 0,00032124 | 0,01656576 | ENSMUSG00C1Bub1          | L             |                     |   |                               |
| ENSMUSG000000090264  | 10,15501244 | 6,886247967    | 1,84532287 | 3,73173069 | 0,00019017 | 0,01178808 | ENSMUSG00C1Eif4ebp3      | G             |                     |   |                               |
| ENSMUSG0000000113841 | 9,634962891 | 6,810322486    | 1,87818381 | 3,62601491 | 0,00028783 | 0,01572382 | ENSMUSG00C1Gm48701       |               |                     |   |                               |
| ENSMUSG000000044103  | 8,797830101 | 6,680655999    | 2,02194368 | 3,3040762  | 0,00095929 | 0,03030743 | ENSMUSG00C1Iif9          | N             |                     |   |                               |
| ENSMUSG000000096375  | 8,30968383  | 6,596255546    | 1,97089253 | 3,34683674 | 0,00081739 | 0,03040838 | ENSMUSG00C1Gm7094        |               |                     |   |                               |
| ENSMUSG000000033882  | 7,814807895 | 6,5281565      | 2,09006534 | 3,12342221 | 0,00178761 | 0,04839694 | ENSMUSG00C1Rbm46         | N             |                     |   |                               |
| ENSMUSG000000081665  | 7,80585912  | 6,506881988    | 1,98237638 | 3,28236456 | 0,0010294  | 0,03483701 | ENSMUSG00C1Gm15922       |               |                     |   |                               |
| ENSMUSG000000022132  | 8,13504613  | 6,433753301    | 1,97768904 | 3,2531673  | 0,00114126 | 0,03660392 | ENSMUSG00C1Cldn10        | N             |                     |   |                               |
| ENSMUSG000000026069  | 272,0811594 | 6,375359854    | 2,04272579 | 3,12100619 | 0,00180234 | 0,04851522 | ENSMUSG00C1Irlr1         | N             |                     |   |                               |
| ENSMUSG00000100001   | 23,87743635 | 6,346466386    | 1,52490963 | 4,16186394 | 3,1566E-05 | 0,00378433 | ENSMUSG00C1810007D17Q    | N             |                     |   |                               |
| ENSMUSG000000035775  | 22,69017844 | 6,05170726     | 1,54455046 | 3,91810266 | 8,9249E-05 | 0,00733513 | ENSMUSG00C1Krt20         | N             |                     |   |                               |
| ENSMUSG000000058119  | 121,7412868 | 5,970186761    | 0,70309687 | 8,49127199 | 2,0439E-17 | 1,2543E-13 | ENSMUSG00C1Gm5771        | P             |                     |   |                               |
| ENSMUSG000000026012  | 27,47073306 | 5,675164935    | 1,57411845 | 3,60529726 | 0,0003118  | 0,01630453 | ENSMUSG00C1Cdz8          | W             |                     |   |                               |
| ENSMUSG000000025058  | 13,19711246 | 5,370625992    | 1,62620609 | 3,30254942 | 0,00095891 | 0,03315537 | ENSMUSG00C15430427019Rik |               |                     |   |                               |
| ENSMUSG000000079455  | 18,31525883 | 5,280215983    | 1,58338789 | 3,3475884  | 0,00085374 | 0,03117295 | ENSMUSG00C1Gm16026       |               |                     |   |                               |
| ENSMUSG000000026512  | 30,69557216 | 5,252353208    | 1,46811052 | 3,57767292 | 0,00034673 | 0,01753636 | ENSMUSG00C1Nkx2          | L             |                     |   |                               |
| ENSMUSG000000094601  | 47,16039487 | 5,08464809     | 1,18377559 | 4,29534568 | 1,7442E-05 | 0,00248922 | ENSMUSG001glkv1-22       |               |                     |   |                               |
| ENSMUSG000000021835  | 39,27876404 | 5,064484846    | 1,42572229 | 3,55222394 | 0,00038199 | 0,01865366 | ENSMUSG00C1Bmp4          | M             |                     |   |                               |
| ENSMUSG000000024670  | 37,25426678 | 4,845004518    | 1,09388204 | 4,42918371 | 9,459E-06  | 0,00155483 | ENSMUSG00C1Cdb6          | O             |                     |   |                               |
| ENSMUSG000000015159  | 1206,790689 | 4,729010537    | 0,8001376  | 5,91024661 | 3,416E-09  | 3,3099E-06 | ENSMUSG00C1Prss3         | T             |                     |   |                               |
| ENSMUSG000000041479  | 24,78766966 | 4,709553933    | 1,18819762 | 3,96361165 | 7,3824E-05 | 0,0065976  | ENSMUSG00C1Syt15         | M             |                     |   |                               |
| ENSMUSG000000071517  | 71,07675696 | 4,640419309    | 0,99812784 | 4,6491232  | 3,3335E-06 | 0,00073059 | ENSMUSG00C1Gm10334       | P             |                     |   |                               |
| ENSMUSG000000029188  | 17,14644104 | 4,601826481    | 1,43877985 | 3,19842294 | 0,00138181 | 0,04099798 | ENSMUSG00C1Sic34a2       | M             |                     |   |                               |
| ENSMUSG000000066513  | 82,081214   | 4,444719588    | 0,81310564 | 5,46634946 | 4,594E-08  | 2,3493E-05 | ENSMUSG00C1Kik1b4        | N             |                     |   |                               |
| ENSMUSG000000042195  | 39,62547552 | 4,35131527     | 0,73814325 | 5,89494692 | 3,748E-09  | 3,4501E-06 | ENSMUSG00C1Sic35f2       | L             |                     |   |                               |
| ENSMUSG000000076490  | 80,62424688 | 4,165058627    | 1,30584028 | 3,18956207 | 0,00142489 | 0,04150655 | ENSMUSG00C1Trbc1         |               |                     |   |                               |
| ENSMUSG000000032083  | 50,82340123 | 4,104863884    | 1,24840507 | 3,28808651 | 0,00100871 | 0,03451686 | ENSMUSG00C1Apoa1         | O             |                     |   |                               |
| ENSMUSG000000007822  | 208,8707391 | 4,054063538    | 1,21380776 | 3,3399552  | 0,00083792 | 0,03103841 | ENSMUSG00C1Tcf7          | M             |                     |   |                               |
| ENSMUSG000000078249  | 283,4976504 | 3,8474701905   | 0,3719978  | 10,415927  | 2,0974E-25 | 3,8614E-21 | ENSMUSG00C1Hmg1a1b       |               |                     |   |                               |
| ENSMUSG000000053219  | 57,84121675 | 3,853258099    | 0,85103448 | 4,52773438 | 5,9619E-06 | 0,00109759 | ENSMUSG00C1Raet1e        | L             |                     |   |                               |
| ENSMUSG000000024857  | 142,5143771 | 3,822309397    | 0,86522742 | 4,41769334 | 9,976E-06  | 0,00159702 | ENSMUSG00C1Cabp2         | O             |                     |   |                               |
| ENSMUSG000000050232  | 42,7377981  | 3,799944627    | 1,17940737 | 3,17103719 | 0,00151896 | 0,0433633  | ENSMUSG00C1Cxxr3         |               |                     |   |                               |
| ENSMUSG000000016283  | 271,7240211 | 3,622323657    | 0,66789093 | 5,42352573 | 5,8435E-08 | 2,831E-05  | ENSMUSG00C1H2-M2         | T             |                     |   |                               |
| ENSMUSG000000029082  | 59,80482846 | 3,613922334    | 1,04708432 | 3,45141481 | 0,00055766 | 0,02410638 | ENSMUSG00C1Bst1          | N             |                     |   |                               |
| ENSMUSG000000005591  | 197,1244242 | 3,514914542    | 0,76012028 | 4,62415581 | 3,7613E-06 | 0,00077808 | ENSMUSG00C1Vklb15        | N             |                     |   |                               |
| ENSMUSG000000042817  | 45,80278391 | 3,488823231    | 0,9860724  | 3,53889945 | 9,0081E-06 | 0,01966585 | ENSMUSG00C1Frl3          | L             |                     |   |                               |
| ENSMUSG000000050921  | 72,50075765 | 3,48294648     | 0,96649611 | 3,52623276 | 0,00032735 | 0,01674051 | ENSMUSG00C1Bpy10         | N             |                     |   |                               |
| ENSMUSG000000048852  | 80,82502379 | 3,480698754    | 0,78646402 | 4,42575715 | 9,6105E-06 | 0,00155655 | ENSMUSG00C1Gm12185       | K             |                     |   |                               |
| ENSMUSG000000027715  | 48,06128975 | 3,459486926    | 1,05015541 | 3,29426187 | 0,00098681 | 0,03395717 | ENSMUSG00C1Cna2          | A             |                     |   |                               |
| ENSMUSG000000027358  | 157,1916444 | 3,423850858    | 0,84809304 | 4,03711703 | 5,4112E-05 | 0,00538488 | ENSMUSG00C1Bmp2          | L             |                     |   |                               |
| ENSMUSG000000043003  | 63,67700275 | 3,40152204     | 0,96733924 | 3,51636934 | 0,00043749 | 0,02054046 | ENSMUSG00C1Rasef         | M             |                     |   |                               |
| ENSMUSG000000066687  | 25,18444988 | 3,395426509    | 1,01781276 | 3,33603007 | 0,00084992 | 0,03117295 | ENSMUSG00C1Zbtb16        | L             |                     |   |                               |
| ENSMUSG000000027863  | 107,3001113 | 3,267693733    | 1,01313344 | 3,22533401 | 0,00125826 | 0,03886665 | ENSMUSG00C1Cdb2          | N             |                     |   |                               |
| ENSMUSG000000027375  | 97,07406245 | 3,256705878    | 0,76777694 | 4,24173441 | 2,218E-05  | 0,00287558 | ENSMUSG00C1Mal           | L             |                     |   |                               |
| ENSMUSG000000045091  | 83,67867019 | 3,246424195    | 0,97680986 | 3,32349653 | 0,00088897 | 0,03171677 | ENSMUSG00C1Aqp12         | N             |                     |   |                               |
| ENSMUSG000000084803  | 27,13973729 | 3,227414022    | 1,03064248 | 3,13145836 | 0,0017394  | 0,0475544  | ENSMUSG00C15830444B04Rik |               |                     |   |                               |
| ENSMUSG000000052477  | 196,095592  | 3,216595597    | 0,75642605 | 4,2523596  | 2,1153E-05 | 0,00284414 | ENSMUSG00C130026212R     | L             |                     |   |                               |
| ENSMUSG000000053886  | 112,2575096 | 3,192679975    | 0,7585215  | 4,20908305 | 2,5641E-05 | 0,00325551 | ENSMUSG00C1Sh2d4a        | M             |                     |   |                               |
| ENSMUSG000000010245  | 190,7114927 | 3,147172378    | 0,54971908 | 5,72505577 | 1,034E-08  | 7,3215E-06 | ENSMUSG00C1Gm26616       |               |                     |   |                               |
| ENSMUSG000000021569  | 42,18905338 | 3,106946489    | 0,88642619 | 3,5052056  | 0,00045656 | 0,02111892 | ENSMUSG00C1Trip13        | B             |                     |   |                               |
| ENSMUSG000000001281  | 222,642467  | 3,08556019     | 0,78002018 | 3,95574404 | 7,6297E-05 | 0,00672069 | ENSMUSG00C1Igtb7         | M             |                     |   |                               |
| ENSMUSG000000070034  | 246,1829212 | 2,928708891    | 0,72738688 | 4,02634277 | 5,6651E-05 | 0,0054905  | ENSMUSG00C1Sp110         |               |                     |   |                               |
| ENSMUSG000000030157  | 130,9487314 | 2,80681151     | 0,61797305 | 4,54196426 | 5,5732E-06 | 0,00104697 | ENSMUSG00C1Clec2d        | B             |                     |   |                               |
| ENSMUSG000000030415  | 88,44919483 | 2,75915412     | 0,71587946 | 3,87587261 | 0,00010624 | 0,00808239 |                          |               |                     |   |                               |

ENSMUSG000000041119 67,01857038 2,088617716 0,53502009 3,90381177 9,46889E-05 0,00751393 ENSMUSG0C Pde9a L

ENSMUSG000000087259 158,3311445 2,048365315 0,3534007 5,79615516 6,7852E-09 5,3867E-06 ENSMUSG0C 2610035D17L O

ENSMUSG000000030144 330,2249677 2,044381428 0,51230741 3,99053648 6,5924E-05 0,0060683 ENSMUSG0C Clec4d O

ENSMUSG000000000058 220,9186651 2,036095107 0,37037315 5,49741552 3,854E-08 2,0272E-05 ENSMUSG0C Cav2 L

ENSMUSG000000078920 347,6375101 2,031301269 0,50991102 3,98363866 6,7868E-05 0,0062167 ENSMUSG0C Ifi4gt1 K

ENSMUSG000000070337 121,8999231 2,028076486 0,61699068 3,28704559 0,00101244 0,03451686 ENSMUSG0C Cpr179 L

ENSMUSG000000026994 250,9688539 2,018715418 0,64069347 3,15082879 0,00162808 0,04568081 ENSMUSG0C Galnt3 L

ENSMUSG000000073489 232,2905104 2,017279673 0,51126287 3,94567995 7,9574E-05 0,00694291 ENSMUSG0C Ifi204 P

ENSMUSG000000106634 94,3659941 2,011179764 0,54341113 3,70102679 0,00021473 0,0130042 ENSMUSG0C Gm43042 S

ENSMUSG000000026639 386,4440786 1,995023604 0,51034779 3,90914522 9,2623E-05 0,0074263 ENSMUSG0C Lamb3 O

ENSMUSG000000080890 103,9437039 1,994336308 0,53677086 3,7154333 0,00020286 0,01244858 ENSMUSG0C Fgfri1 L

ENSMUSG000000007174 466,055316 1,993672862 0,52649131 3,78671561 0,00015265 0,01014555 ENSMUSG0C Csf2rb2 N

ENSMUSG000000029771 122,6141134 1,966998738 0,52431156 3,75158374 0,00017572 0,01107885 ENSMUSG0C Irf5 L

ENSMUSG000000015396 274,9966671 1,952864979 0,51777475 3,77164973 0,00016217 0,01052215 ENSMUSG0C Cd83 L

ENSMUSG000000024043 90,85308316 1,949157393 0,57037251 3,41734106 0,00063236 0,02604418 ENSMUSG0C Arhgap28 B

ENSMUSG000000061353 1415,013159 1,946329921 0,29391853 6,62200474 3,5436E-11 6,8859E-08 ENSMUSG0C Cxcl12 L

ENSMUSG000000024778 203,2718547 1,934088169 0,51114607 3,78382672 0,00015444 0,01022718 ENSMUSG0C Fas L

ENSMUSG000000032854 207,3849468 1,923336793 0,57819474 3,32645157 0,00087959 0,0315265 ENSMUSG0C Ugt18a O

ENSMUSG000000046056 111,716243 1,920500131 0,56896934 3,37540181 0,00073708 0,02862793 ENSMUSG0C Sbsn O

ENSMUSG000000037370 189,1189288 1,919581361 0,60244067 3,18634095 0,00144085 0,041905 ENSMUSG0C Enpp1 B

ENSMUSG000000027864 650,9162172 1,857941736 0,33616153 5,52693153 3,2588E-08 1,8149E-05 ENSMUSG0C Ptgfrn B

ENSMUSG000000034463 725,9330609 1,84932063 0,41791366 4,42512607 9,6386E-06 0,00155655 ENSMUSG0C Scaras L

ENSMUSG000000053559 86,91063235 1,847291883 0,47794878 3,86504156 0,00011107 0,0082048 ENSMUSG0C Smapg L

ENSMUSG000000006731 508,0715103 1,839221422 0,52163679 3,525866 0,0004221 0,02007283 ENSMUSG0C B4galnt1 L

ENSMUSG000000006331 211,3807352 1,837362632 0,41811706 3,94674763 1,1094E-05 0,0017607 ENSMUSG0C Ifi4gt1 N

ENSMUSG000000041734 373,7412006 1,824416959 0,48374711 3,77142707 0,00016232 0,01052215 ENSMUSG0C Kirrel L

ENSMUSG000000023348 136,6993142 1,821911185 0,53266039 3,42039925 0,00062529 0,02581086 ENSMUSG0C Trp6 M

ENSMUSG000000038128 130,6794909 1,81379695 0,50838523 3,56776094 0,00036004 0,0180611 ENSMUSG0C Camk4 L

ENSMUSG000000006628 218,9622236 1,801216937 0,56334533 3,19735844 0,00138692 0,04099798 ENSMUSG0C Hk2 L

ENSMUSG000000001761 227,4593755 1,792863736 0,42190919 4,24940667 2,1434E-05 0,00284414 ENSMUSG0C Smo L

ENSMUSG000000040026 1187,801305 1,778324649 0,33537795 5,30244955 1,1426E-07 4,7807E-05 ENSMUSG0C Saa3 M

ENSMUSG000000020282 296,0072115 1,767676451 0,27685528 6,38483921 1,7158E-10 2,1058E-07 ENSMUSG0C Rhbdf1 L

ENSMUSG000000048070 160,66973 1,735354612 0,55411754 3,13174458 0,00173771 0,0475544 ENSMUSG0C Cpr1 N

ENSMUSG000000032625 292,8382 1,724026072 0,39468611 4,36809409 1,2534E-05 0,00195545 ENSMUSG0C Thsd7a L

ENSMUSG000000046818 135,9375471 1,715615211 0,43977862 3,9010883 9,5761E-05 0,0075507 ENSMUSG0C Ddit4f L

ENSMUSG000000079363 1718,259507 1,711835335 0,26531289 6,45213795 1,1028E-10 1,4502E-07 ENSMUSG0C Gbp4 K

ENSMUSG000000029338 307,6649706 1,711186401 0,44824299 3,81754195 0,00013479 0,0092938 ENSMUSG0C Antxr2 L

ENSMUSG000000035314 138,283519 1,709195371 0,37899376 4,50982455 6,4481E-06 0,00115971 ENSMUSG0C Gdtp5 L

ENSMUSG000000021097 390,444565 1,707649706 0,25580337 6,67563417 2,4617E-11 5,6649E-08 ENSMUSG0C Clmn B

ENSMUSG000000028982 183,0787657 1,701846893 0,39014978 4,36203473 1,2886E-05 0,00197238 ENSMUSG0C Slc25a33 L

ENSMUSG000000006132 430,8863407 1,687688551 0,53780046 3,13813146 0,00170029 0,04678963 ENSMUSG0C Blnk K

ENSMUSG000000095115 1023,111809 1,680529332 0,31431332 5,34666159 8,9591E-08 4,0229E-05 ENSMUSG0C Tlrip1d L

ENSMUSG000000039981 167,4928034 1,674828777 3,78779592 0,00015199 0,01013815 ENSMUSG0C Zc3h12d L

ENSMUSG000000004583 1,674692516 0,44541745 3,75982674 0,00017003 0,01080692 ENSMUSG0C Mest M

ENSMUSG000000028937 456,955846 1,67263767 0,40683092 4,11387597 9,3929E-06 0,00439385 ENSMUSG0C Acat7 L

ENSMUSG000000039997 277,1492292 1,660249919 0,48851083 3,9859387 0,00067733 0,02725051 ENSMUSG0C Ifi203 O

ENSMUSG000000020290 456,2295076 1,652470928 0,51492954 3,20912047 0,00133142 0,03994561 ENSMUSG0C Ppp1r17 O

ENSMUSG000000006619 554,3481545 1,65225171 0,45350571 3,64328753 0,00026918 0,01507156 ENSMUSG0C Cyba L

ENSMUSG000000026712 82,37929831 1,651273125 0,52249417 3,16036661 0,00157571 0,04449198 ENSMUSG0C Mrc1 N

ENSMUSG000000024511 162,7269012 1,649933936 0,40954045 4,02874472 5,6075E-05 0,0054905 ENSMUSG0C Rab27b L

ENSMUSG000000024349 250,5500285 1,649710312 0,52929541 3,1168045 0,00182823 0,04906366 ENSMUSG0C Tmem173 K

ENSMUSG000000047180 3056,954494 1,645261007 0,25332977 6,49454275 8,3286E-11 1,1795E-07 ENSMUSG0C Neuril3 K

ENSMUSG000000054200 524,416114 1,634165544 0,40093316 4,07590523 4,5836E-05 0,00494371 ENSMUSG0C Ffar4 L

ENSMUSG000000034528 315,7091757 1,632116681 0,50619516 3,22428344 0,00126288 0,03894419 ENSMUSG0C Hsd17b13 X

ENSMUSG000000027376 135,6548678 1,630977889 0,40203383 4,05681756 4,9746E-05 0,00511633 ENSMUSG0C Prom2 M

ENSMUSG000000039004 184,0497407 1,62822264 0,46504452 3,50121888 0,00046314 0,02120975 ENSMUSG0C Bmp6 M

ENSMUSG000000020592 1053,337664 1,625415163 0,38507069 4,22108257 2,4313E-05 0,00313011 ENSMUSG0C Sdc1 L

ENSMUSG000000072812 212,30577 1,61567904 0,47930067 3,37090923 0,00074921 0,02891587 ENSMUSG0C Ahnak2 N

ENSMUSG000000025017 553,7025633 1,611373271 0,46067137 3,4978802 0,00046897 0,02137072 ENSMUSG0C Pk3ap1 L

ENSMUSG000000041889 191,8267198 1,610626612 0,46154588 3,48963491 0,00048368 0,02177155 ENSMUSG0C Shis4a L

ENSMUSG000000063873 141,5828868 1,606360782 0,42780887 3,75485615 0,00017344 0,01104862 ENSMUSG0C Slc24a3 L

ENSMUSG000000034957 172,3354614 1,589522388 0,44209443 3,59543743 0,00032385 0,01665369 ENSMUSG0C Cebpa L

ENSMUSG000000004855 1565,96506 1,576292516 0,30949025 3,98576394 3,6615E-07 0,00012719 ENSMUSG0C Mest M

ENSMUSG000000037679 317,8124647 1,569780181 0,47193594 3,32625604 0,00088021 0,03152568 ENSMUSG0C Ifi72 L

ENSMUSG000000011256 214,8282829 1,560522105 0,4925024 3,60812354 0,00030842 0,01619939 ENSMUSG0C Adam19 R

ENSMUSG000000024538 237,5764176 1,556459688 0,43989898 3,53822069 0,00040283 0,01961947 ENSMUSG0C Ppic L

ENSMUSG000000020704 281,252518 1,552119908 0,388038 3,99991728 6,3656E-05 0,00595175 ENSMUSG0C Slc43a3 M

ENSMUSG000000070530 190,295541 1,542637337 0,47493097 3,24812956 0,00116166 0,03687281 ENSMUSG0C Wfdc16 C

ENSMUSG000000012428 12022,2227 1,53881175 0,17860443 8,6157535 6,9483E-18 6,3959E-14 ENSMUSG0C Steap4 M

ENSMUSG000000050686 498,6185628 1,534914372 0,45327985 3,38624002 0,00070857 0,02814066 ENSMUSG0C Ampd3 M

ENSMUSG000000028776 362,4689967 1,527846361 0,42686056 5,57926334 0,00034456 0,017475 ENSMUSG0C Tinagl1 L

ENSMUSG000000027878 793,0957829 1,525903649 0,41884381 3,6431329 0,00026934 0,01507156 ENSMUSG0C Ntch2 L

ENSMUSG000000018849 961,0814833 1,520939927 0,22995708 6,61401666 3,7403E-11 6,8859E-08 ENSMUSG0C Wwv1 L

ENSMUSG000000029762 1447,397382 1,518326094 0,29488552 5,14886616 2,6207E-07 9,6493E-05 ENSMUSG0C Arh1b8 K

ENSMUSG000000044734 737,8229843 1,516803495 0,39429064 3,8469173 0,00011961 0,00860188 ENSMUSG0C Serpinb1a K

ENSMUSG000000031714 653,6121177 1,514922784 0,3312601 4,57321237 4,803E-06 0,00094068 ENSMUSG0C Gab1 B

ENSMUSG000000028337 360,6760912 1,512302684 0,43254065 3,496325 0,00047171 0,02144219 ENSMUSG0C Coro2a X

ENSMUSG00000001604 83,53673235 1,510807787 0,46123269 3,27558693 0,00105443 0,03523048 ENSMUSG0C Tcea3 L

ENSMUSG000000033174 157,9600037 1,508991985 0,33213441 4,54331728 5,5376E-06 0,00104697 ENSMUSG0C Mgll L

ENSMUSG000000049521 412,7446004 1,507142113 0,44638557 3,37632358 0,00073461 0,02859251 ENSMUSG0C Cdc42ep1 B

ENSMUSG000000004951 870,6102529 1,504242197 0,2782577 5,40593203 6,4472E-08 3,0434E-05 ENSMUSG0C Hspb1 L

ENSMUSG000000004763 1796,5330313 1,496292247 0,29653366 5,04560435 4,5209E-07 0,00014602 ENSMUSG0C Basp1 L

ENSMUSG000000027809 618,0149299 1,493812465 0,38526245 3,89567802 9,793E-05 0,00076035 ENSMUSG0C Ifi4f1 K

ENSMUSG00000001249 144,1553124 1,488800703 0,44805619 3,3227991 0,00089119 0,03173466 ENSMUSG0C Hpn O

ENSMUSG000000022126 175,1271323 1,481122167 0,35179941 4,21013262 2,5522E-05 0,00325551 ENSMUSG0C Acd1 L

ENSMUSG000000075012 222,8796782 1,479180897 0,30674294 4,82221654 1,4197E-06 0,00036301 ENSMUSG0C Fjx1 M

ENSMUSG000000029484 892,5616786 1,470970312 0,43292419 3,39775497 0,00067941 0,02725051 ENSMUSG0C Anxa3 L

ENSMUSG000000014444 892,7862086 1,465468036 0,31449155 4,659801 3,1652E-06 0,00070205 ENSMUSG0C Piezo1 B

ENSMUSG000000020010 1020,934892 1,461522214 0,32127666 4,54910796 5,3874E-06 0,00104402 ENSMUSG0C Vmn3 K

ENSMUSG000000024302 216,297008 1,460864218 0,3018272 4,84006809 1,2979E-06 0,00034136 ENSMUSG0C Dtna L

ENSMUSG000000026604 478,4227093 1,456027411 0,38312461 3,80040173 0,00014446 0,0097419 ENSMUSG0C Ptpn14 L

ENSMUSG000000029860 2041,707821 1,454645935 0,28132564 5,17068376 2,3324E-07 8,9457E-05 ENSMUSG0C Ypx A

ENSMUSG000000032068 1108,420223 1,442318874 0,35665153 4,04405628 5,2534E-05 0,00528501 ENSMUSG0C Plet1 D

ENSMUSG000000048905 1592,8480057 1,430760829 0,29021665 4,929975 8,224E-07 0,00024032 ENSMUSG0C 4930539E081 K

ENSMUSG000000032776 651,1895891 1,418135323 0,42883142 3,30697622 0,00094309 0,03288308 ENSMUSG0C Mctp2 L

ENSMUSG000000017639 472,7423537 1,412877303 0,25586373 5,52199145 3,3518E-08 1,8149E-05 ENSMUSG0C Rab11fp4 L

ENSMUSG000000027401 911,3466028 1,406985336 0,18304966 7,68635876 1,5138E-14 5,5739E-11 ENSMUSG0C Tgm3 N

ENSMUSG000000047878 250,73182 1,403909271 0,4305635 3,26063233 0,00111164 0,0360222 ENSMUSG0C Akgalt L

ENSMUSG000000055044 792,3899927 1,401136554 0,32471422 4,31498364 1,5961E-05 0,00231379 ENSMUSG0C Pdlim1 L

ENSMUSG000000002565 237,787529 1,399818374 0,34493737 4,05818123 4,9456E-05 0,00511633 ENSMUSG0C Scin L

ENSMUSG000000030616 495,5789006 1,386357344 0,40028584 4,46341841 0,00053336 0,02354707 ENSMUSG0C Syt12 Q

ENSMUSG000000004705 1471,507295 1,383016705 0,32391861 4,26964268 1,9579E-05 0,00271099 ENSMUSG0C Cp K

ENSMUSG000000026249 735,433087 1,374013015 0,42204052 2,5564237 0,00113136 0,03641323 ENSMUSG0C Serpine2 L

ENSMUSG000000024197 659,4728485 1,370720611 0,32141599 4,26463111 2,0023E-05 0,00273058 ENSMUSG0C Plin3 L

ENSMUSG000000032038 375,9580472 1,36949221 0,37336323 3,667989 0,00024447 0,01433316 ENSMUSG0C St3ga14 B

ENSMUSG000000045103 257,7790424 1,364789615 0,38384522 3,55557281 0,00037716 0,01865366 ENSMUSG0C Dmd L

ENSMUSG0000000090175 470,3377357 1,363631058 0,34585932 3,94273333 8,0558E-05 0,00697732 ENSMUSG0C Ugt1a9 K

ENSMUSG000000023972 446,679564 1,360431446 0,34753275 3,91454176 9,0576E-05 0,00736341 ENSMUSG0C Ptk7 L

ENSMUSG000000020173 671,1241906 1,352535407 0,27961978 4,83705192 1,3178E-06 0,0003417 ENSMUSG0C Cobl X

ENSMUSG000000004631 905,4237463 1,351708519 0,34604693 3,90614217 9,3781E-05 0,00747409 ENSMUSG0C Sgce L

ENSMUSG000000042745 775,9098005 1,349359697 0,27793007 4,85503308 1,2037E-06 0,00032115 ENSMUSG0C Id1 L

ENSMUSG000000023249 232,1750687 1,343346772 0,31104201 4,31885965 1,5684E-05 0,00229157 ENSMUSG0C Parp3 K

ENSMUSG000000035277 1066,697241 1,338825965 0,38130153 5,51120012 0,00044609 0,02084388 ENSMUSG0C Arx L

ENSMUSG000000002020 141,0252546 1,335567158 0,40292072 3,31471447 0,00091737 0,03223432 ENSMUSG0C Ltp2 L

ENSMUSG000000050440 1702,251358 1,335246493 0,32087904 4,16121441 3,1656E-05 0,00378433 ENSMUSG0C Hamp O

ENSMUSG000000054855 366,8968503 1,328487473 0,28296939 4,69480974 2,6685E-06 0,0006141 ENSMUSG0C Rnd1 L

ENSMUSG000000004891 1833,338923 1,326427478 0,33665735 3,93999258 8,1484E-05 0,00697732 ENSMUSG0C Nes M

ENSMUSG000000038412 743,8694454 1,320564387 0,23602807 5,59494624 2,2069E-08 0,01306E-05 ENSMUSG0C Higd1a L

ENSMUSG000000024664 376,4399648 1,320081142 0,41350971 3,19238246 0,00141104 0,04136515 ENSMUSG0C Fads3 M

ENSMUSG000000018920 1723,998575 1,319552951 0,30816061 4,28202989 1,852E-05 0,00260581 ENSMUSG0C Cxcl16 L

ENSMUSG000000024912 674,3718206 1,318870875 0,34498463 3,82294669 6,00013185 0,00922922 ENSMUSG0C Fcrl1 L

ENSMUSG000000053110 411,6568618 1,318159957 0,39583874 3,33004286 0,00086833 0,0315265 ENSMUSG0C Yapt L

ENSMUSG000000051439 792,3817468 1,315879779 0,40138532 3,27834558 0,00104417 0,03506072 ENSMUSG0C Cd14 M

ENSMUSG000000034271 276,4334162 1,314091206 0,36470065 3,60320496 0,00031432 0,01630453 ENSMUSG0C Idp2 M

ENSMUSG000000030342 1680,569829 1,31038123 0,30715912 4,26613166 1,9898E-05 0,00273058 ENSMUSG0C Cd9 L

ENSMUSG00000004

ENSMUSG00000041859 403,9687236 1,287250447 0,38462537 3,34676426 0,00081761 0,03040838 ENSMUSG0C Mcm3 L

ENSMUSG00000034930 466,2419077 1,276359141 0,21839699 5,84421573 5,0896E-09 4,2591E-06 ENSMUSG0C Rtnk L

ENSMUSG00000004267 2381,683954 1,270069689 0,21368853 5,94355582 2,789E-09 2,8526E-06 ENSMUSG0C Zc3h12a A

ENSMUSG000000040717 397,4977149 1,269128765 0,30908653 4,106063 0,0246E-05 0,00446342 ENSMUSG0C Ii17rd B

ENSMUSG000000105383 257,640768 1,266067273 0,38055545 3,32682561 0,00087848 0,0315265 ENSMUSG0C Na K

ENSMUSG000000075010 525,3482214 1,257687087 0,37403472 3,36246352 0,0007725 0,0294216 ENSMUSG0C AW112010 L

ENSMUSG000000047281 857,57274312 1,248913694 0,39082899 3,19555029 0,00139564 0,04104444 ENSMUSG0C Sfn L

ENSMUSG000000031825 5486,929793 1,241791057 0,18125526 6,85106208 7,3304E-12 1,9279E-08 ENSMUSG0C Crispd12 M

ENSMUSG000000003153 325,5033009 1,235025745 0,28926239 4,26956898 1,9585E-05 0,00271099 ENSMUSG0C Sic2a3 L

ENSMUSG000000040249 2838,032494 1,225895171 0,24235875 5,0581841 4,2327E-07 0,0001406 ENSMUSG0C Lrp1 L

ENSMUSG000000066800 229,9699696 1,220097317 0,36256179 3,36521206 0,00076485 0,0292134 ENSMUSG0C Rnasel K

ENSMUSG000000028028 501,4109473 1,217365635 0,37250605 3,26804255 0,00108294 0,03560168 ENSMUSG0C Alpk1 N

ENSMUSG000000026980 819,513466 1,199311806 0,3096097 0,87261163 0,00010768 0,00812419 ENSMUSG0C Ly75 L

ENSMUSG000000037012 1333,903084 1,19678631 0,26848327 4,45758239 8,2889E-06 0,00138826 ENSMUSG0C Hk1 N

ENSMUSG000000021700 858,6387973 1,196041272 0,26108694 4,58100768 4,6274E-06 0,00091603 ENSMUSG0C Rab3c L

ENSMUSG000000001333 358,3233553 1,190380075 0,2872362 4,14425506 3,4092E-05 0,00399767 ENSMUSG0C Sync B

ENSMUSG000000050721 656,1617705 1,188890252 0,36269017 3,27797761 0,00104554 0,03506072 ENSMUSG0C Plekho2 A

ENSMUSG000000052920 191,0064624 1,18779709 0,36368945 3,26596523 0,00109092 0,03573625 ENSMUSG0C Prkg1 L

ENSMUSG000000038067 2307,697039 1,184221729 0,24207659 4,89192993 9,9852E-07 0,00028281 ENSMUSG0C Csf3 K

ENSMUSG000000037405 5789,658683 1,176574415 0,14814476 7,942059 1,9885E-15 9,1522E-12 ENSMUSG0C Icam1 M

ENSMUSG000000036718 592,9082672 1,173622922 0,25938765 4,52459058 6,0513E-06 0,00110301 ENSMUSG0C Mical2 K

ENSMUSG000000018774 1081,605756 1,170254171 0,34813046 3,36153916 0,00077509 0,0294216 ENSMUSG0C Cd68 F

ENSMUSG000000027583 150,0648953 1,166897148 0,35773069 3,26194307 0,00110651 0,0360222 ENSMUSG0C Zbtb46 B

ENSMUSG000000074457 601,4570005 1,155686406 0,32402196 3,56669158 0,00036152 0,01808565 ENSMUSG0C S100a16 K

ENSMUSG000000049980 121,1118964 1,151520009 0,3631394 3,17053526 0,00152158 0,0433633 ENSMUSG0C Fapb5 B

ENSMUSG000000001750 535,4453459 1,149877112 0,31585502 3,64052185 0,00027209 0,01508766 ENSMUSG0C Trcp1 K

ENSMUSG000000047261 552,310333 1,137507267 0,29441788 3,86358076 0,00011174 0,0082048 ENSMUSG0C Gap43 M

ENSMUSG000000045348 409,5376867 1,126787098 0,31279033 3,60237186 0,00031533 0,01630665 ENSMUSG0C Nypa1 L

ENSMUSG000000056596 686,1646432 1,125873337 0,27115393 4,15215573 3,2936E-05 0,00388685 ENSMUSG0C Trnp1 L

ENSMUSG000000059401 993,2867895 1,120290026 0,27565587 4,06408917 4,822E-05 0,00507279 ENSMUSG0C Mamid1 L

ENSMUSG000000030257 450,6704845 1,115659789 0,34640929 3,22064051 0,00127904 0,03902319 ENSMUSG0C Srgap3 B

ENSMUSG000000020019 611,5342067 1,112924063 0,29664475 3,75170655 0,00017563 0,01017885 ENSMUSG0C Ntn4 L

ENSMUSG000000000409 267,8152783 1,108044409 0,33371507 3,32033076 0,00089911 0,03189323 ENSMUSG0C Lck O

ENSMUSG000000034127 3002,11689 1,097648554 0,28172126 3,89622197 9,7705E-05 0,00706635 ENSMUSG0C Tspan8 L

ENSMUSG000000035864 808,6587635 1,091321335 0,30702338 3,55452188 0,00037867 0,01865366 ENSMUSG0C Syt1 L

ENSMUSG000000028073 277,4641033 1,081652155 0,33085908 3,26922308 0,00107843 0,03551689 ENSMUSG0C Pear1 W

ENSMUSG000000055805 529,1171583 1,080220174 0,33122448 3,26131295 0,00110898 0,0360222 ENSMUSG0C Fmnl1 L

ENSMUSG00000012519 768,8170811 1,076756563 0,28659933 3,75701005 0,00017196 0,01099202 ENSMUSG0C Mlk1 B

ENSMUSG000000090877 458,904681 1,074853453 0,28960689 3,71142228 0,0002061 0,01260553 ENSMUSG0C Hspa1b A

ENSMUSG00000019851 977,2435441 1,06891275 0,31594974 3,38317338 0,00071653 0,02834773 ENSMUSG0C Perp A

ENSMUSG000000060550 1936,217918 1,060987897 0,33476319 3,16936842 0,00152771 0,04346997 ENSMUSG0C H2-Q7 L

ENSMUSG000000065351 1061,513588 1,059274541 0,28909254 3,66413658 0,00024817 0,01439485 ENSMUSG0C Sema3e L

ENSMUSG00000110386 2725,084545 1,0566027181 0,29189455 3,617838 0,00029707 0,0115945 ENSMUSG0C Gm42031 B

ENSMUSG000000051533 1403,844895 1,046865199 0,31695501 3,30590741 0,00094669 0,03238421 ENSMUSG0C Fapb5 B

ENSMUSG000000027398 739,7715875 1,037783667 0,30683393 3,38223244 0,00071899 0,02834773 ENSMUSG0C Iib O

ENSMUSG000000000078 2025,887264 1,036441029 0,22991033 4,50802296 6,5434E-06 0,00115971 ENSMUSG0C Klf6 A

ENSMUSG000000035385 3292,031895 1,035317613 0,30411041 3,40441358 0,00066306 0,02692823 ENSMUSG0C Ccl2 N

ENSMUSG000000003849 1067,644241 1,032739785 0,31550313 3,27331069 0,00106296 0,03529294 ENSMUSG0C Nqa1 D

ENSMUSG000000038463 255,1982929 1,014364486 0,26256394 3,8633047 0,00011186 0,0082048 ENSMUSG0C Olfml2b L

ENSMUSG000000022960 287,0301027 1,010574543 0,27310722 3,70028497 0,00021536 0,0130042 ENSMUSG0C Donson A

ENSMUSG000000070639 1421,174589 1,000593964 0,23290337 4,29617646 1,7377E-05 0,00248922 ENSMUSG0C Lrrc8b A

ENSMUSG000000045312 978,0733109 0,997353131 0,30991607 3,21813949 0,00129025 0,03913264 ENSMUSG0C Lhfp12 L

ENSMUSG000000073409 626,179091 0,997148411 0,31772133 3,13843709 0,00169851 0,04678963 ENSMUSG0C H2-Q6 L

ENSMUSG000000031453 659,6741476 0,996096158 0,29952809 3,32555175 0,00088244 0,03154499 ENSMUSG0C Rasa3 B

ENSMUSG000000060626 333,6487635 0,991101701 0,26486437 3,74192154 0,00018262 0,01139663 ENSMUSG0C Dhrr3 L

ENSMUSG000000031934 586,328822 0,990900931 0,31691694 3,12668968 0,00176786 0,04800351 ENSMUSG0C Panx1 L

ENSMUSG000000030302 709,7560929 0,988468846 0,19742904 5,0067045 5,537E-07 0,00016989 ENSMUSG0C Klf4 A

ENSMUSG000000027347 583,7435932 0,98526962 0,27266628 3,61346339 0,00030213 0,0161244 ENSMUSG0C Rasgrp1 L

ENSMUSG000000091387 474,7289705 0,985184073 0,2979844 3,30615988 0,00094584 0,03288421 ENSMUSG0C Gntc4 B

ENSMUSG000000030934 1176,866824 0,979759541 0,29114075 3,36524356 0,00076476 0,0292134 ENSMUSG0C Oat L

ENSMUSG000000060477 791,1432954 0,971025246 0,21761479 4,46212883 8,1149E-06 0,00138826 ENSMUSG0C Irak2 A

ENSMUSG00000019889 1943,976985 0,97085881 0,24631664 3,94150712 8,0971E-05 0,00697732 ENSMUSG0C Piprk L

ENSMUSG000000019225 564,7736695 0,96750775 0,23693115 4,04241329 5,2904E-05 0,00529226 ENSMUSG0C Mam12 D

ENSMUSG000000040404 685,7837321 0,965029367 0,30104814 3,20563205 0,00134766 0,04025087 ENSMUSG0C Cxcr1 B

ENSMUSG000000019539 862,0184882 0,960857241 0,24870466 3,8634473 0,0001118 0,0082048 ENSMUSG0C Rcn3 M

ENSMUSG000000047963 1060,564858 0,957828186 0,27472844 3,48645445 0,00048947 0,02192486 ENSMUSG0C Stbd1 A

ENSMUSG000000039982 450,501155 0,956313486 0,27200677 3,51577089 0,00043848 0,02054046 ENSMUSG0C Dtv4 B

ENSMUSG000000049382 37058,38855 0,955222173 0,20677171 4,61969474 3,8431E-06 0,00078612 ENSMUSG0C Krt8 A

ENSMUSG000000104713 8600,034222 0,953524695 0,18603993 5,12537668 2,9694E-07 0,00010719 ENSMUSG0C Gbp6 L

ENSMUSG000000002489 525,1376559 0,950885087 0,27577099 3,44809685 0,00056455 0,02428363 ENSMUSG0C Tiam1 O

ENSMUSG000000039089 299,2746013 0,950112817 0,29861215 3,18176212 0,00146382 0,04237252 ENSMUSG0C L3mbt13 L

ENSMUSG00000019850 3022,25271 0,946502636 0,2349361 4,02876633 5,607E-05 0,0054905 ENSMUSG0C Trnfalp3 E

ENSMUSG000000037706 6076,760773 0,944096709 0,22733003 4,15297843 3,2818E-05 0,00388685 ENSMUSG0C Cd81 B

ENSMUSG000000085795 469,2844355 0,940963935 0,29746107 3,16331788 0,00155982 0,04424695 ENSMUSG0C Zfp703 B

ENSMUSG000000024074 765,4114084 0,938074783 0,27359781 4,42866329 0,00060656 0,02549497 ENSMUSG0C Crim1 B

ENSMUSG000000020674 1745,20397 0,937312657 0,25902572 3,61860843 0,00029619 0,015945 ENSMUSG0C Pxdn L

ENSMUSG000000021959 805,5878052 0,935777159 0,25700059 3,64114794 0,00027143 0,01508766 ENSMUSG0C Lats2 B

ENSMUSG000000038387 722,6098899 0,924652125 0,26788493 3,45167653 0,00055712 0,02410638 ENSMUSG0C Rras B

ENSMUSG000000048489 2810,538616 0,924429087 0,15398168 6,00350035 1,9311E-09 2,0912E-06 ENSMUSG0C Depp1 A

ENSMUSG000000058952 388,1179892 0,922627281 0,29364436 3,14198872 0,00167804 0,04645355 ENSMUSG0C Cfi L

ENSMUSG000000014599 6966,989842 0,919955566 0,17404395 5,28576596 1,2518E-07 5,1212E-05 ENSMUSG0C Cxrl A

ENSMUSG000000014816 958,0315116 0,915545084 0,25534398 3,58551952 0,00033641 0,01715587 ENSMUSG0C Dmd8 B

ENSMUSG000000032090 685,7837321 0,907808443 0,13976714 6,4954581158 1,556E-07 6,2272E-05 ENSMUSG0C Mov10 B

ENSMUSG000000039594 993,5170332 0,903835936 0,24529939 3,68461561 0,00022905 0,0136025 ENSMUSG0C Dock4 A

ENSMUSG000000029298 3064,196944 0,901207523 0,20136289 4,47553935 7,6219E-06 0,00133637 ENSMUSG0C Gbp9 K

ENSMUSG000000047501 14263,69912 0,899538843 0,17589966 5,11393179 3,1552E-07 0,00011171 ENSMUSG0C Cldn4 A

ENSMUSG000000038740 474,5688412 0,899167654 0,26462064 3,39794984 0,00067893 0,00272051 ENSMUSG0C Mv12b M

ENSMUSG000000000861 389,9228408 0,894636459 0,24765992 3,61235867 0,00030342 0,0161244 ENSMUSG0C Bcl11a L

ENSMUSG000000016256 10454,48054 0,892977595 0,18582802 4,80539799 1,5444E-06 0,0003895 ENSMUSG0C Ctsz L

ENSMUSG000000029919 2581,469114 0,891955834 0,26530225 3,36203649 0,0007737 0,0294216 ENSMUSG0C Hpgds L

ENSMUSG000000030166 251,4153044 0,883604211 0,27793213 3,17920857 0,00147678 0,04261361 ENSMUSG0C Rad52 L

ENSMUSG000000062661 441,026324 0,881345912 0,2697635 3,26710592 0,00108653 0,03565601 ENSMUSG0C Cdc1 A

ENSMUSG000000017144 1328,438048 0,881066214 0,20735911 4,24898722 2,1474E-05 0,00284414 ENSMUSG0C Rnd3 A

ENSMUSG000000017652 1460,870384 0,88053622 0,27764719 3,1714213 0,00151695 0,0433633 ENSMUSG0C Cd40 L

ENSMUSG000000075415 1347,00511 0,879762044 0,25110607 3,50354754 0,0004591 0,02116127 ENSMUSG0C Fnbp1 A

ENSMUSG000000072115 5555,308144 0,877858657 0,20282458 4,32816705 1,5036E-05 0,00221443 ENSMUSG0C Ang C

ENSMUSG000000066363 1105,28223 0,875481561 0,22049952 3,9704466 7,1738E-05 0,00647401 ENSMUSG0C Serpina3f N

ENSMUSG000000030123 2192,987835 0,872630125 0,26929552 3,24041832 0,00119354 0,03762527 ENSMUSG0C Plxnd1 B

ENSMUSG000000079014 665,0806467 0,863315347 0,21543795 4,00725762 6,1428E-05 0,00589552 ENSMUSG0C Serpina3l P

ENSMUSG000000024070 571,8872553 0,862743908 0,25798882 3,34411351 0,00082546 0,03063853 ENSMUSG0C Prkd3 B

ENSMUSG000000050569 304,6786254 0,857618319 0,26712202 3,2105864 0,00132464 0,03991277 ENSMUSG0C Rab39 A

ENSMUSG000000022733 1364,184728 0,840595497 0,16024127 3,24581158 1,556E-07 6,2272E-05 ENSMUSG0C Mov10 B

ENSMUSG000000027276 785,3908154 0,839048587 0,24529365 3,45378943 0,00055277 0,02410638 ENSMUSG0C Jag1 A

ENSMUSG000000035476 1266,050071 0,838570664 0,16725015 5,01387101 5,3346E-07 0,00016646 ENSMUSG0C Tab3 B

ENSMUSG000000034438 1108,476757 0,829299122 0,15567973 5,32695646 9,9872E-08 4,2759E-05 ENSMUSG0C Gbp8 K

ENSMUSG000000060961 927,3418024 0,827296224 0,20933457 3,95202869 7,7491E-05 0,00679342 ENSMUSG0C Sic4a4 B

ENSMUSG000000017765 1063,015204 0,819984447 0,21419934 3,82813707 0,00012912 0,00910744 ENSMUSG0C Sic12a4 B

ENSMUSG000000024558 1064,796632 0,81456998 0,22320761 3,64938265 0,00026287 0,01498285 ENSMUSG0C Mapk4 A

ENSMUSG000000032366 5903,22455 0,810227522 0,18167267 4,45982068 8,2028E-06 0,00138826 ENSMUSG0C Tpm1 L

ENSMUSG000000023232 733,2553529 0,803934106 0,22837471 3,52024144 0,00043115 0,02035269 ENSMUSG0C Serinc2 B

ENSMUSG000000029761 3461,695347 0,801907708 0,22489153 3,56575324 0,00036281 0,0181013 ENSMUSG0C Cald1 L

ENSMUSG000000024885 733,7121322 0,801865959 0,20741039 3,86608385 0,0001106 0,0082048 ENSMUSG0C Aldh3b1 D

ENSMUSG000000031628 2384,973356 0,800504101 0,17370557 4,60839635 4,0579E-06 0,00082094 ENSMUSG0C Casp3 A

ENSMUSG000000031379 505,2731192 0,797570922 0,23213689 3,43577842 0,00059085 0,02512153 ENSMUSG0C Pir L

ENSMUSG000000041827 1144,151315 0,790139422 0,25163987 3,1399612 0,0016897 0,04666363 ENSMUSG0C Oasl1 L

ENSMUSG000000052560 639,5012181 0,78826109 0,24391701 3,23167745 0,00123066 0,038271 ENSMUSG0C Cpn8 B

ENSMUSG000000038608 1253,031885 0,786260872 0,21111591 3,72430899 0,00019585 0,01209938 ENSMUSG0C Dock10 I

ENSMUSG000000058325 1353,815459 0,784266829 0,21417837 3,6617462 0,0002505 0,01445687 ENSMUSG0C Dock1 L

ENSMUSG000000047139 6974,698281 0,782262565 0,19491445 4,01336353 5,986E-05 0,00576905 ENSMUSG0C Cd24a L

ENSMUSG000000055172 2662,679604 0,780658003 0,20762399 3,76000869 0,00016991 0,01080687 ENSMUSG0C C1ra L

ENSMUSG000000039621 2233,421714 0,780154776 0,21960241 3,52578441 0,00038148 0,01865366 ENSMUSG0C Prc1 B

ENSMUSG000000022720 2430,329266 0,77608052 0,2331002 3,32941826 0,00087028 0,0315265 ENSMUSG0C Retreg1 L

ENSMUSG000000060675 1524,414584 0,772245431 0,18744638 4,11982057 3,7917E-05 0,0043628 ENSMUSG0C Pla2g16 B

ENSMUSG000000007872 1265,443411 0,768232228 0,22355344 4,43645901 0,00058937 0,0251165 ENSMUSG0C Id3 L

ENSMUSG000000030691 1925,729873 0,768059579 0,19243493 3,99126904 6,5721E-05 0,0060683 ENSMUSG0C Fchsd2 A

ENSMUSG000000020400 4521,270477 0,765667733

|                     |              |             |            |            |            |            |                         |   |
|---------------------|--------------|-------------|------------|------------|------------|------------|-------------------------|---|
| ENSMUSG00000026421  | 3785,429203  | 0,753833175 | 0,22843935 | 3,29992696 | 0,0009671  | 0,0333414  | ENSMUSG0C Crsp1         | A |
| ENSMUSG000000006435 | 4419,975017  | 0,748139984 | 0,17225418 | 4,3432327  | 1,404E-05  | 0,00211868 | ENSMUSG0C Neur11a       | C |
| ENSMUSG000000037411 | 13897,63324  | 0,7432801   | 0,22994509 | 3,23242434 | 0,00122745 | 0,03823568 | ENSMUSG0C Serpine1      | C |
| ENSMUSG000000048218 | 3840,742564  | 0,741983903 | 0,18277257 | 4,05960201 | 4,9156E-05 | 0,00511633 | ENSMUSG0C Amigo2        | A |
| ENSMUSG000000037434 | 1313,609349  | 0,739985085 | 0,22885919 | 3,23336414 | 0,00022341 | 0,03823568 | ENSMUSG0C Slc30a1       | A |
| ENSMUSG000000039115 | 452,473176   | 0,738978579 | 0,20392775 | 3,63372734 | 0,00029039 | 0,01581668 | ENSMUSG0C Itga9         | L |
| ENSMUSG000000028701 | 802,5607005  | 0,735835398 | 0,22425539 | 3,28123834 | 0,00103352 | 0,0348483  | ENSMUSG0C Lurap1        | L |
| ENSMUSG000000040093 | 672,5164557  | 0,727056235 | 0,21911302 | 3,31817902 | 0,00090606 | 0,03201658 | ENSMUSG0C Bmf           | B |
| ENSMUSG000000086841 | 737,7874245  | 0,726155291 | 0,22452759 | 3,23414727 | 0,00122007 | 0,03823    | ENSMUSG0C 2410006H16Rik |   |
| ENSMUSG000000046711 | 4679,133652  | 0,723456773 | 0,18784236 | 3,85140381 | 0,00011744 | 0,0084789  | ENSMUSG0C Hmga1         | A |
| ENSMUSG000000020227 | 1023,534669  | 0,719653709 | 0,22656389 | 3,17638311 | 0,00149124 | 0,04289641 | ENSMUSG0C Irak3         | L |
| ENSMUSG000000042228 | 2396,393218  | 0,711794553 | 0,19428557 | 3,66365109 | 0,00024865 | 0,01439485 | ENSMUSG0C Lyn           | B |
| ENSMUSG000000050973 | 2201,68985   | 0,711379706 | 0,20630714 | 3,44815845 | 0,00056442 | 0,0428363  | ENSMUSG0C Rcn1          | B |
| ENSMUSG000000039835 | 2022,292619  | 0,710167155 | 0,14981255 | 4,74037154 | 2,1333E-06 | 0,00051004 | ENSMUSG0C Nhs1          | L |
| ENSMUSG000000042331 | 1133,545488  | 0,696245133 | 0,19714293 | 3,53167697 | 0,00041293 | 0,01979715 | ENSMUSG0C Specc1        | A |
| ENSMUSG000000039145 | 514,3061008  | 0,692561552 | 0,22024566 | 3,14449585 | 0,00166373 | 0,0461979  | ENSMUSG0C Camk1d        | B |
| ENSMUSG000000024066 | 1400,05722   | 0,689022426 | 0,21558921 | 3,19599673 | 0,00139349 | 0,04104444 | ENSMUSG0C Xdh           | K |
| ENSMUSG000000039960 | 2809,842054  | 0,688190542 | 0,12404294 | 5,54800253 | 2,8895E-08 | 1,6624E-05 | ENSMUSG0C Rhou          | A |
| ENSMUSG000000028469 | 705,0401645  | 0,686806371 | 0,21355912 | 3,21600118 | 0,0012999  | 0,03925992 | ENSMUSG0C Npr2          | L |
| ENSMUSG000000042129 | 5558,487444  | 0,686475836 | 0,1748922  | 3,92513685 | 8,668E-05  | 0,00725358 | ENSMUSG0C Rassf4        | A |
| ENSMUSG000000023905 | 2627,192605  | 0,681121165 | 0,16748183 | 4,06683628 | 4,7656E-05 | 0,00507279 | ENSMUSG0C Tnfrsf12a     | A |
| ENSMUSG000000104346 | 1730,511216  | 0,676379475 | 0,20379553 | 3,3189122  | 0,00090369 | 0,03199404 | ENSMUSG0C Pcdhga3       | S |
| ENSMUSG000000038508 | 1353,992334  | 0,675482979 | 0,20828686 | 3,24304167 | 0,00118261 | 0,03740865 | ENSMUSG0C Gdf15         | X |
| ENSMUSG000000021087 | 2149,483762  | 0,672498599 | 0,18289638 | 3,67693781 | 0,00023605 | 0,0139285  | ENSMUSG0C Rtn1          | L |
| ENSMUSG000000021876 | 35026,24833  | 0,670112603 | 0,18345248 | 3,6527858  | 0,0002524  | 0,01483772 | ENSMUSG0C Arhgap4       | B |
| ENSMUSG000000020407 | 5245,917214  | 0,669408444 | 0,1810625  | 3,69711258 | 0,00021807 | 0,01307684 | ENSMUSG0C Upp1          | B |
| ENSMUSG000000048087 | 1140,468676  | 0,666589408 | 0,19734755 | 3,37774358 | 0,00073083 | 0,02856606 | ENSMUSG0C Gm4737        | S |
| ENSMUSG000000022965 | 2645,598957  | 0,665460442 | 0,19380861 | 3,44654207 | 0,00056781 | 0,04236686 | ENSMUSG0C Ifngr2        | A |
| ENSMUSG000000018417 | 3078,222163  | 0,664284393 | 0,18197941 | 3,65032731 | 0,00026191 | 0,01497421 | ENSMUSG0C Myo1b         | L |
| ENSMUSG00000009585  | 2945,936756  | 0,659122478 | 0,17988029 | 3,66422837 | 0,00024809 | 0,01439485 | ENSMUSG0C Apobec3       | B |
| ENSMUSG000000069805 | 2053,285029  | 0,649190827 | 0,18535111 | 3,50249222 | 0,00046093 | 0,02116127 | ENSMUSG0C Fbp1          | L |
| ENSMUSG000000047648 | 652,4183483  | 0,64368009  | 0,16448143 | 3,91339071 | 9,1009E-05 | 0,00736341 | ENSMUSG0C Fbxo30        | A |
| ENSMUSG000000042524 | 1094,119682  | 0,64182055  | 0,17128005 | 3,74719977 | 0,00017882 | 0,01119752 | ENSMUSG0C Sun2          | A |
| ENSMUSG000000090035 | 2214,641251  | 0,638548191 | 0,1435091  | 4,44953095 | 8,6058E-06 | 0,00142732 | ENSMUSG0C Galnt4        | B |
| ENSMUSG000000026425 | 900,442253   | 0,638144521 | 0,20293483 | 3,14457863 | 0,00166326 | 0,0461979  | ENSMUSG0C Srgap2        | B |
| ENSMUSG000000040525 | 2765,403669  | 0,629244881 | 0,19140266 | 3,28754513 | 0,00101065 | 0,03451686 | ENSMUSG0C Cblc          | B |
| ENSMUSG000000021025 | 9684,254012  | 0,622779741 | 0,10016778 | 6,21736598 | 5,0557E-10 | 5,8172E-07 | ENSMUSG0C Nfkbia        | A |
| ENSMUSG000000021895 | 1695,0604    | 0,614760443 | 0,14163679 | 4,34040075 | 1,4222E-05 | 0,00212872 | ENSMUSG0C Arhgef3       | L |
| ENSMUSG000000028413 | 2250,364335  | 0,604623279 | 0,1590336  | 3,80185863 | 0,00014361 | 0,00972039 | ENSMUSG0C B4galnt1      | A |
| ENSMUSG000000027994 | 1189,944027  | 0,603123131 | 0,15752557 | 3,82873161 | 0,00012881 | 0,00910744 | ENSMUSG0C Mcub          | A |
| ENSMUSG000000040659 | 3776,159532  | 0,600525019 | 0,15005309 | 4,00208361 | 6,2787E-05 | 0,00592775 | ENSMUSG0C Ehd2          | A |
| ENSMUSG000000024048 | 1727,080849  | 0,598705452 | 0,14797529 | 4,04596606 | 5,2108E-05 | 0,0052835  | ENSMUSG0C Myl12a        | A |
| ENSMUSG000000030042 | 717,1635305  | 0,592103556 | 0,16756214 | 3,5336356  | 0,00040989 | 0,01970234 | ENSMUSG0C Poef4         | A |
| ENSMUSG000000030908 | 49804,226337 | 0,587484695 | 0,1420702  | 3,13676001 | 3,5224E-05 | 0,00410431 | ENSMUSG0C Ucn93b1       | A |
| ENSMUSG000000021823 | 4760,38473   | 0,585343282 | 0,16681074 | 3,46545295 | 0,00052542 | 0,02330882 | ENSMUSG0C Vcl           | B |
| ENSMUSG000000021996 | 11455,73734  | 0,58226953  | 0,15250609 | 3,8180084  | 0,00013453 | 0,0092938  | ENSMUSG0C Esd           | F |
| ENSMUSG000000034917 | 2521,475146  | 0,579266385 | 0,16048574 | 3,60945701 | 0,00030684 | 0,01619939 | ENSMUSG0C Tjp3          | C |
| ENSMUSG000000020306 | 1424,739139  | 0,576445068 | 0,1811266  | 3,18255335 | 0,00145983 | 0,04232346 | ENSMUSG0C Pcdhgc4       |   |
| ENSMUSG000000041135 | 2900,218972  | 0,573995744 | 0,14049113 | 4,08563676 | 4,3956E-05 | 0,04078835 | ENSMUSG0C Ripk2         | A |
| ENSMUSG000000024052 | 1959,961636  | 0,563175137 | 0,12416341 | 4,53575777 | 5,7397E-06 | 0,00106735 | ENSMUSG0C Lpin2         | B |
| ENSMUSG000000024661 | 72052,40933  | 0,557881099 | 0,17407217 | 3,20488384 | 0,00135117 | 0,04025087 | ENSMUSG0C Fh1           | A |
| ENSMUSG000000052684 | 5574,432264  | 0,556329774 | 0,14140236 | 3,93437412 | 8,3414E-05 | 0,00707672 | ENSMUSG0C Jun           | A |
| ENSMUSG000000034422 | 6466,152334  | 0,550408307 | 0,16404396 | 3,35524876 | 0,00079294 | 0,02991385 | ENSMUSG0C Parp14        | B |
| ENSMUSG000000019947 | 2055,128047  | 0,539384864 | 0,13756895 | 3,92083278 | 8,8243E-05 | 0,00730646 | ENSMUSG0C Arid5b        | L |
| ENSMUSG000000023030 | 7772,112677  | 0,537390533 | 0,11301002 | 4,75524688 | 1,982E-06  | 0,00048652 | ENSMUSG0C Slc11a2       | A |
| ENSMUSG000000032786 | 2948,649781  | 0,537228519 | 0,15693664 | 3,42321913 | 0,00061884 | 0,02565963 | ENSMUSG0C Alas1         | A |
| ENSMUSG000000022500 | 4316,464458  | 0,532184753 | 0,15511776 | 3,4308435  | 0,00060171 | 0,02540697 | ENSMUSG0C Lita          | A |
| ENSMUSG000000040128 | 8074,875922  | 0,530226067 | 0,13751256 | 3,85583746 | 0,00011533 | 0,00839249 | ENSMUSG0C Pnrc1         | A |
| ENSMUSG000000006818 | 21722,58205  | 0,527614909 | 0,15099148 | 4,49433554 | 0,00047524 | 0,02149688 | ENSMUSG0C Sod2          | A |
| ENSMUSG000000018340 | 19504,63145  | 0,52511555  | 0,10762883 | 4,87894857 | 1,0665E-06 | 0,0002975  | ENSMUSG0C Anxa6         | A |
| ENSMUSG000000051043 | 2900,190086  | 0,512727379 | 0,16716796 | 3,12097704 | 0,00180252 | 0,04851522 | ENSMUSG0C Gprc5c        | B |
| ENSMUSG000000044864 | 3048,367388  | 0,520882681 | 0,1614685  | 3,22590894 | 0,00125573 | 0,03886665 | ENSMUSG0C Ankr50        | A |
| ENSMUSG000000008003 | 25611,63141  | 0,519355829 | 0,15202679 | 3,41668447 | 0,00063338 | 0,02604679 | ENSMUSG0C Gspt1         | A |
| ENSMUSG000000029455 | 2453,996351  | 0,512356358 | 0,15186925 | 3,3736675  | 0,00074194 | 0,02868785 | ENSMUSG0C Alkb2         | B |
| ENSMUSG000000069662 | 4918,73417   | 0,510735351 | 0,14785496 | 3,45429979 | 0,00055172 | 0,02410638 | ENSMUSG0C Marcks        | A |
| ENSMUSG000000020983 | 2105,624371  | 0,50898455  | 0,14500472 | 3,5101241  | 0,00044479 | 0,02087543 | ENSMUSG0C Relb          | A |
| ENSMUSG000000050912 | 4070,006174  | 0,505382429 | 0,12647003 | 3,99606514 | 6,4404E-05 | 0,00598827 | ENSMUSG0C Trnm123       | A |
| ENSMUSG000000016382 | 3883,820564  | 0,503241149 | 0,15357238 | 3,27689887 | 0,00104954 | 0,03513095 | ENSMUSG0C Pls3          | A |
| ENSMUSG000000030203 | 3197,737328  | 0,502578095 | 0,16054268 | 3,13049515 | 0,00174512 | 0,0475965  | ENSMUSG0C Disp16        | A |
| ENSMUSG000000035356 | 8865,466883  | 0,499378575 | 0,11536878 | 4,32854162 | 1,501E-05  | 0,00221443 | ENSMUSG0C Nfkbia        | A |
| ENSMUSG000000038235 | 10131,95788  | 0,498855077 | 0,14561572 | 3,42583263 | 0,00061292 | 0,02564504 | ENSMUSG0C F11r          | A |
| ENSMUSG000000050708 | 136184,542   | 0,498418957 | 0,13055497 | 3,81769435 | 0,0001347  | 0,0092938  | ENSMUSG0C Fh1           | A |
| ENSMUSG000000036620 | 2703,732063  | 0,495106858 | 0,14873043 | 3,32888738 | 0,00087194 | 0,0315265  | ENSMUSG0C Mga4tb        | B |
| ENSMUSG000000033545 | 2516,805536  | 0,492743863 | 0,13345808 | 3,69212472 | 0,00022239 | 0,01329276 | ENSMUSG0C Znrf1         | B |
| ENSMUSG000000050087 | 9483,344542  | 0,486333346 | 0,15153444 | 3,20939161 | 0,00133016 | 0,03994561 | ENSMUSG0C Cd44          | L |
| ENSMUSG000000034573 | 2420,931349  | 0,480274155 | 0,13739108 | 3,49567196 | 0,00047287 | 0,02144219 | ENSMUSG0C Ptpn13        | B |
| ENSMUSG000000026479 | 5554,417345  | 0,477770834 | 0,11751023 | 4,0657807  | 4,7872E-05 | 0,00507279 | ENSMUSG0C Lamc2         | B |
| ENSMUSG000000039943 | 3178,787824  | 0,471311184 | 0,13564702 | 3,47454135 | 0,00051173 | 0,02275558 | ENSMUSG0C Plcb4         | I |
| ENSMUSG000000028961 | 9811,403023  | 0,464718297 | 0,14135232 | 3,28765954 | 0,00101024 | 0,03451686 | ENSMUSG0C Pcd           | A |
| ENSMUSG000000068876 | 13346,75979  | 0,461662007 | 0,10357137 | 4,45742893 | 8,2949E-06 | 0,00138826 | ENSMUSG0C Cgn           | A |
| ENSMUSG000000057406 | 3192,646452  | 0,461545374 | 0,11917792 | 3,87274222 | 0,00010762 | 0,00812419 | ENSMUSG0C Nsd2          | A |
| ENSMUSG000000008956 | 2885,232509  | 0,454850739 | 0,14323685 | 3,17551489 | 0,00040957 | 0,04256787 | ENSMUSG0C Plk2b         | H |
| ENSMUSG000000023959 | 1442,839845  | 0,454837708 | 0,1340195  | 3,81895444 | 0,00071988 | 0,02834773 | ENSMUSG0C Clec5         | L |
| ENSMUSG000000032852 | 13558,39992  | 0,449523034 | 0,1180717  | 3,80720394 | 0,00014055 | 0,00961884 | ENSMUSG0C Rspod4        | B |
| ENSMUSG000000031897 | 4669,005952  | 0,446398157 | 0,11272362 | 3,96011208 | 7,4915E-05 | 0,00663934 | ENSMUSG0C Psm10         | L |
| ENSMUSG000000017009 | 7289,876496  | 0,444407571 | 0,13313636 | 3,33798808 | 0,00084387 | 0,0311337  | ENSMUSG0C Sdc4          | A |
| ENSMUSG000000075254 | 11345,26872  | 0,437272009 | 0,1102302  | 3,96689851 | 7,2814E-05 | 0,00653905 | ENSMUSG0C Heg1          | A |
| ENSMUSG000000023224 | 25746,99976  | 0,433166655 | 0,11294124 | 3,83532746 | 0,0001254  | 0,00891336 | ENSMUSG0C Serping1      | D |
| ENSMUSG000000027366 | 7505,51624   | 0,432691792 | 0,10876655 | 3,97816971 | 6,9448E-05 | 0,00632938 | ENSMUSG0C Sppl2a        | A |
| ENSMUSG000000093934 | 6071,186851  | 0,430132972 | 0,10582516 | 4,0645626  | 4,8123E-05 | 0,00507279 | ENSMUSG0C Syn2          | A |
| ENSMUSG000000071637 | 11719,96773  | 0,429391222 | 0,1316335  | 3,26202076 | 0,00110621 | 0,0360222  | ENSMUSG0C Cebpd         | A |
| ENSMUS              |              |             |            |            |            |            |                         |   |

ENSMUSG00000028926 2810,638068 -0,970737149 0,1884006 -5,1525161 2,5701E-07 9,6493E-05 ENSMUSG0C Cdk14 B

ENSMUSG000000105263 8287,220339 -0,969909547 0,23541155 -4,1200593 3,7877E-05 0,0043628 ENSMUSG0C Gm42427 B

ENSMUSG000000039628 734,6382013 -0,960140017 0,30836003 -3,113698 0,00184758 0,04943901 ENSMUSG0C Hs3t6 B

ENSMUSG000000073791 184,4739954 -0,944319948 0,29974172 -3,1504455 0,00163022 0,04568081 ENSMUSG0C Efcab7 E

ENSMUSG000000030785 1631,938161 -0,937222402 0,20564941 -3,29107305 -3,219889 0,0012824 0,03902319 ENSMUSG0C Cxw6a2 H

ENSMUSG000000042797 652,9864155 -0,936042471 0,22027764 -4,2493757 2,1437E-05 0,00284414 ENSMUSG0C Aop11 B

ENSMUSG000000051435 681,6815899 -0,92676326 0,28315037 -3,2730427 0,00106396 0,03529294 ENSMUSG0C Fhad1 A

ENSMUSG000000037843 5970,418924 -0,916070892 0,25318875 -3,6181343 0,00029673 0,015945 ENSMUSG0C Vstm2l A

ENSMUSG000000059824 746,7541073 -0,898189384 0,28256881 -3,1786572 0,00147959 0,04262792 ENSMUSG0C Dbp A

ENSMUSG000000036800 772,4370102 -0,894664734 0,27757281 -3,2231713 0,0012678 0,03902319 ENSMUSG0C Fam135b L

ENSMUSG000000016179 272,8207984 -0,875807177 0,23794831 -3,6806165 0,00023263 0,01370778 ENSMUSG0C Camk1g L

ENSMUSG000000057069 81456,37061 -0,874627724 0,21997159 -3,976094 7,0056E-05 0,0063534 ENSMUSG0C Erol1b A

ENSMUSG000000027487 857,7664583 -0,870466072 0,24871169 -3,4999002 0,00046543 0,02126206 ENSMUSG0C Cdk5rap1 A

ENSMUSG000000035299 1310,349301 -0,867340958 0,27535055 -3,1499517 0,00163297 0,04568507 ENSMUSG0C Mid1 A

ENSMUSG000000028825 561,6371392 -0,86730947 0,2607245 -3,3265361 0,00087933 0,0315265 ENSMUSG0C Rhd Q

ENSMUSG000000005373 1925,580749 -0,865794203 0,26384639 -3,2814328 0,00103281 0,0348483 ENSMUSG0C Mlxip1 A

ENSMUSG000000021287 440,807743 -0,863383062 0,24192877 -3,568749 0,00035869 0,0180423 ENSMUSG0C Xrcc3 B

ENSMUSG000000038058 1623,420677 -0,862463612 0,20564795 -4,1938838 2,7422E-05 0,00345778 ENSMUSG0C Nod1 D

ENSMUSG000000021071 1255,944353 -0,849562613 0,21056208 -4,034737 5,4664E-05 0,00541051 ENSMUSG0C Trim9 B

ENSMUSG000000022235 845,4250531 -0,848535698 0,26039751 -3,2586168 0,00111957 0,03616008 ENSMUSG0C Cnml1 L

ENSMUSG000000024553 1343,051801 -0,815976106 0,25515158 -3,1980052 0,00138382 0,04099798 ENSMUSG0C Gair1 B

ENSMUSG000000027984 18235,73686 -0,811756169 0,22589783 -3,593466 0,00032631 0,01673352 ENSMUSG0C Hadh A

ENSMUSG000000097530 681,5638173 -0,808122058 0,25948923 -3,1142798 0,00184395 0,04941344 ENSMUSG0C Kams12-ps A

ENSMUSG000000024027 7143,335379 -0,8061771402 0,20564941 -3,9201251 8,8503E-05 0,00730646 ENSMUSG0C Gnip1r A

ENSMUSG000000030216 536,8280211 -0,802102344 0,25059876 -3,2042886 0,00135387 0,04026903 ENSMUSG0C Trim66 L

ENSMUSG000000034219 3095,615055 -0,798771384 0,13794773 -5,7903916 7,0023E-09 5,3867E-06 ENSMUSG0C Atm B

ENSMUSG000000024972 547,5412522 -0,796767195 0,22425312 -3,5529816 0,00038089 0,01865366 ENSMUSG0C Lgals12 L

ENSMUSG000000074207 4071,950756 -0,794488671 0,2119561 -3,7483643 0,00017799 0,01118371 ENSMUSG0C Adh1 A

ENSMUSG000000044139 57317,62381 -0,787997278 0,20423821 -3,8582265 0,00011421 0,00834388 ENSMUSG0C Prss53 A

ENSMUSG000000058248 4901,878824 -0,77826955 0,16668871 -4,6689998 3,0267E-06 0,00068792 ENSMUSG0C Kcnh1 L

ENSMUSG000000009246 1952,47086 -0,773548737 0,23929073 -3,2326732 0,00122638 0,03823568 ENSMUSG0C Trpm5 K

ENSMUSG000000030761 1294,919401 -0,771882992 0,16768988 -4,6030385 4,1637E-06 0,0008332 ENSMUSG0C Myo7a N

ENSMUSG000000036402 53072,5212 -0,756331509 0,180571 -4,1885548 2,8074E-05 0,00351589 ENSMUSG0C Gng12 B

ENSMUSG000000037279 642,9904923 -0,753935098 0,23447793 -3,2153777 0,00130273 0,03931681 ENSMUSG0C Ovol2 L

ENSMUSG000000031255 12802,42819 -0,75039097 0,17207957 -4,3607208 1,2963E-05 0,00197238 ENSMUSG0C Sytl4 L

ENSMUSG000000026185 7384,795711 -0,746561707 0,14432811 -5,1726701 2,3077E-07 8,9457E-05 ENSMUSG0C Igfbp5 L

ENSMUSG000000022702 2316,854056 -0,743837372 0,15804947 -4,7063579 2,5218E-06 0,00059521 ENSMUSG0C Hira A

ENSMUSG000000027314 861,6576648 -0,743230849 0,16999563 -4,3720586 1,2308E-05 0,00193668 ENSMUSG0C Dll4 L

ENSMUSG000000044645 2897,481789 -0,73830317 0,22716014 -3,250144 0,00115347 0,03680296 ENSMUSG0C Gm7334 L

ENSMUSG000000056158 3569,286629 -0,735376281 0,21492904 -3,421484 0,0006228 0,02576589 ENSMUSG0C Car10 A

ENSMUSG000000097908 688,7545295 -0,729992781 0,22484183 -3,2466947 0,00116754 0,0369954 ENSMUSG0C 4933404012 B

ENSMUSG000000013089 3296,154732 -0,726299039 0,12370785 -5,8710828 4,3296E-09 3,7956E-06 ENSMUSG0C Ets5 I

ENSMUSG000000070880 3095,521111 -0,721828946 0,20700933 -3,4869393 0,00048858 0,02192486 ENSMUSG0C Gad1 A

ENSMUSG000000009915 9157806,966 -0,709678093 0,19250267 -3,665821 0,00024655 0,01439485 ENSMUSG0C Ins2 A

ENSMUSG000000055409 11017,1338 -0,708512053 0,15314053 -4,6265483 3,7181E-06 0,00077784 ENSMUSG0C Nell1 B

ENSMUSG000000106133 434,734907 -0,707928548 0,22757464 -3,1107532 0,00186611 0,04977022 ENSMUSG0C Gm3724 A

ENSMUSG000000049971 1242,083927 -0,698021657 0,20224661 -3,4513392 0,00055781 0,02410638 ENSMUSG0C Glt1d1 A

ENSMUSG000000079620 7582,19844 -0,689708173 0,20676052 -3,3357828 0,0008506 0,03112795 ENSMUSG0C Muc4 D

ENSMUSG000000022479 11056,3572 -0,679308285 0,20107682 -3,3783521 0,00072922 0,02856356 ENSMUSG0C Vdr A

ENSMUSG000000055254 19604,4819 -0,67696089 0,19428133 -3,4844361 0,00049318 0,02203727 ENSMUSG0C Ntrk2 L

ENSMUSG000000041842 4606,442382 -0,675794096 0,20986874 -3,2200798 0,00128155 0,03902319 ENSMUSG0C Fhdc1 A

ENSMUSG000000035804 3973591,361 -0,663569766 0,20754307 -3,1972629 0,00138738 0,04099798 ENSMUSG0C Ins1 C

ENSMUSG000000020169 1155,376083 -0,662953385 0,19785633 -3,3506807 0,00080613 0,03022584 ENSMUSG0C Best3 L

ENSMUSG000000041895 12913,85929 -0,662362588 0,19561924 -3,3859788 0,00070925 0,02814066 ENSMUSG0C Wip1 A

ENSMUSG000000042638 3859,924777 -0,657821798 0,18660161 -3,525274 0,00042304 0,02007283 ENSMUSG0C Gucy2c L

ENSMUSG000000070348 13490,28492 -0,65616414 0,13821833 -4,7473019 2,0615E-06 0,00049937 ENSMUSG0C Ccond1 L

ENSMUSG000000025140 5783,033348 -0,646346808 0,1694412 -3,8145789 0,00013642 0,00937092 ENSMUSG0C Pycr1 L

ENSMUSG000000026443 786,2616553 -0,641878012 0,1962251 -3,271131 0,00107118 0,03534136 ENSMUSG0C Lrm2 A

ENSMUSG000000037106 2648,201143 -0,641554878 0,18898761 -3,3946927 0,00068706 0,02743756 ENSMUSG0C Fer1f6 O

ENSMUSG000000046593 15666,92085 -0,638839765 0,16513266 -3,8686456 0,00010944 0,00819032 ENSMUSG0C Tmem215 A

ENSMUSG000000026189 603,542421 -0,637566488 0,19272699 -3,3081328 0,0009392 0,03280971 ENSMUSG0C Pccr B

ENSMUSG000000098956 531,3460911 -0,634889846 0,17965306 -3,5339773 0,00040936 0,01970234 ENSMUSG0C Sng18 B

ENSMUSG00000004453 9859,490984 -0,62688538 0,15730274 -3,9264328 8,6215E-05 0,00724757 ENSMUSG0C Ffar1 B

ENSMUSG000000019876 576,2191923 -0,621166351 0,19669736 -3,1579802 0,00158866 0,04472064 ENSMUSG0C Pkb X

ENSMUSG000000026930 4126,487245 -0,613585248 0,16987712 -3,6119357 0,00030392 0,0161244 ENSMUSG0C Gpm1 C

ENSMUSG000000028445 5679,972936 -0,612633369 0,17327206 -3,5356732 0,00040674 0,01970234 ENSMUSG0C Erho C

ENSMUSG000000025036 3747,972807 -0,609408247 0,18797485 -3,2419669 0,00118708 0,0374856 ENSMUSG0C Sfn2 A

ENSMUSG000000034584 3733,346337 -0,60767448 0,19465045 -3,1218756 0,00179703 0,04850923 ENSMUSG0C Exph5 B

ENSMUSG000000020614 2338,469872 -0,605115059 0,15481072 -3,9087412 9,2778E-05 0,0074263 ENSMUSG0C Fam20a A

ENSMUSG000000033653 3549,399595 -0,602843317 0,15510036 -3,8867952 0,00010158 0,00779176 ENSMUSG0C Vps8 I

ENSMUSG000000020262 2064,695148 -0,596011129 0,14307724 -4,1656601 3,1045E-05 0,00378106 ENSMUSG0C Adarb1 A

ENSMUSG000000022420 1563,013973 -0,59202939 0,16962951 -3,490132 0,00048278 0,02177155 ENSMUSG0C Dnal4 A

ENSMUSG000000030355 3355,526468 -0,591533977 0,15684634 -3,7714235 0,00016232 0,01052215 ENSMUSG0C Fkbp11 B

ENSMUSG000000039137 2778,40206 -0,591169974 0,18802782 -3,1440559 0,00166624 0,0461979 ENSMUSG0C Whrn A

ENSMUSG000000029644 10843,76514 -0,575789139 0,14938499 -3,8543975 0,00011601 0,0084088 ENSMUSG0C Pdx1 A

ENSMUSG000000039062 9107,218462 -0,575425027 0,16799867 -3,4251761 0,0006144 0,0256488 ENSMUSG0C Anpep L

ENSMUSG000000019066 19129,84062 -0,575167971 0,13971562 -4,1167049 3,8433E-05 0,00436758 ENSMUSG0C Rab3d A

ENSMUSG000000027004 6949,341352 -0,573320663 0,1611244 -3,5582485 0,00037334 0,01852592 ENSMUSG0C Frzb B

ENSMUSG000000062944 1782,05135 -0,56707281 0,16878799 -3,359675 0,00078034 0,02955987 ENSMUSG0C 9130023H24I A

ENSMUSG000000020471 1914,033066 -0,565341715 0,12193826 -4,6362948 3,5471E-06 0,0007506 ENSMUSG0C Pcd3 A

ENSMUSG000000070392 1318,754284 -0,565180718 0,13314443 -4,2448737 2,1872E-05 0,00285572 ENSMUSG0C Gm20634 A

ENSMUSG000000069011 2368,238798 -0,563974337 0,17530154 -3,2171671 0,00129463 0,03920093 ENSMUSG0C Rcan2 A

ENSMUSG000000031976 13680,41928 -0,5626758 0,19869027 -3,1279802 0,00176031 0,04793976 ENSMUSG0C Sirt6 D

ENSMUSG000000061911 1767,467763 -0,561127428 0,18041951 -3,1101261 0,00187007 0,04977022 ENSMUSG0C Myt11 B

ENSMUSG000000008881 1820,569354 -0,559727955 0,16310405 -3,4317233 0,00059976 0,02538291 ENSMUSG0C Dlg3 A

ENSMUSG000000036599 2230,513745 -0,558007361 0,13646996 -4,088866 4,3494E-05 0,00477874 ENSMUSG0C Cht12 A

ENSMUSG000000034171 2105,461458 -0,554514383 0,17405345 -3,1858857 0,00144312 0,041905 ENSMUSG0C Faah B

ENSMUSG000000030515 1292,840573 -0,554350744 0,15201114 -3,646777 0,00026555 0,01503866 ENSMUSG0C Tars12 A

ENSMUSG000000032965 6160,397492 -0,553471658 0,11864908 -4,6647785 3,0895E-06 0,00069363 ENSMUSG0C Ift57 A

ENSMUSG000000026163 29676,50528 -0,553351824 0,1613442 -3,4296356 0,00060439 0,02546193 ENSMUSG0C Sphkap A

ENSMUSG000000022661 3376,254265 -0,550400751 0,13999774 -3,9314974 8,4418E-05 0,0071291 ENSMUSG0C Cd200 A

ENSMUSG000000028601 1216,579347 -0,546880254 0,14026725 -3,8988449 9,6653E-05 0,00757181 ENSMUSG0C Ehdhc2 B

ENSMUSG000000023393 3151,940646 -0,546022419 0,15487521 -3,5255636 0,00042258 0,02007283 ENSMUSG0C Slc17a9 A

ENSMUSG000000052271 8610,79896 -0,542675467 0,14542207 -3,7317269 0,00019017 0,01178808 ENSMUSG0C Bhlha15 A

ENSMUSG000000040943 1088,887326 -0,538308858 0,14344798 -3,7526416 0,00017498 0,01107885 ENSMUSG0C Tet2 A

ENSMUSG000000035187 21218,44073 -0,537898852 0,15939465 -3,3746356 0,00073913 0,02864731 ENSMUSG0C Nkx6-1 A

ENSMUSG000000061601 13759,86544 -0,536110226 0,16577245 -3,2340128 0,00122064 0,03823 ENSMUSG0C Pclo A

ENSMUSG000000041556 1649,120403 -0,528231951 0,14983521 -3,5254194 0,00042281 0,02007283 ENSMUSG0C Fbxo2 B

ENSMUSG000000058070 2600,742924 -0,525434557 0,13906916 -3,7782247 0,00015795 0,01038523 ENSMUSG0C Em1 O

ENSMUSG000000047747 2388,09083 -0,522312087 0,14161148 -3,6883458 0,00022572 0,01344804 ENSMUSG0C Rnf150 L

ENSMUSG000000031840 6713,324306 -0,51584279 0,16269914 -3,1705318 0,0015216 0,0433633 ENSMUSG0C Rab3a A

ENSMUSG00000002654 1023,179588 -0,509706121 0,15445486 -3,3000329 0,00096673 0,0333414 ENSMUSG0C Dusp23 A

ENSMUSG000000010946 947,0185955 -0,509590275 0,16204446 -3,144756 0,00166225 0,0461979 ENSMUSG0C Brd3os X

ENSMUSG000000044254 1867,674399 -0,509015926 0,15293981 -3,3282107 0,00087406 0,0315265 ENSMUSG0C Pcsk9 C

ENSMUSG000000066640 1386,504143 -0,501133227 0,15222025 -3,2921587 0,00099421 0,03414831 ENSMUSG0C Fbw18 B

ENSMUSG000000035095 1265,26074 -0,49740839 0,14601428 -3,4065736 0,00065784 0,02679381 ENSMUSG0C Fam167a L

ENSMUSG000000033278 5823,687626 -0,489370419 0,15599796 -3,1370309 0,00170668 0,04689553 ENSMUSG0C Ptprrm A

ENSMUSG000000055737 11275,69835 -0,487660293 0,14230103 -3,4269625 0,00061037 0,02556795 ENSMUSG0C Ghr A

ENSMUSG000000020917 248750,2656 -0,485415237 0,14410087 -3,3685794 0,00075557 0,02910037 ENSMUSG0C Aclr A

ENSMUSG000000028127 11198,98031 -0,484529093 0,14286446 -3,39153 0,00069504 0,02769611 ENSMUSG0C Abcd3 A

ENSMUSG000000027765 1940,042542 -0,480473131 0,14674039 -3,2743073 0,00105921 0,03529294 ENSMUSG0C Pzr1 A

ENSMUSG000000042303 3590,747377 -0,480394093 0,13315582 -3,607759 0,00030885 0,01619939 ENSMUSG0C Sgsm3 A

ENSMUSG000000054423 7860,613419 -0,480157903 0,14776631 -3,2494411 0,00115632 0,0368302 ENSMUSG0C Cadsps A

ENSMUSG000000026171 2003,287572 -0,475908207 0,12095337 -3,9346418 8,3321E-05 0,00707672 ENSMUSG0C Rnf25 A

ENSMUSG000000032890 4314,60039 -0,470844714 0,13799839 -3,4119581 0,00064498 0,02632835 ENSMUSG0C Rims3 F

ENSMUSG000000044550 4810,437094 -0,462822862 0,13747979 -3,3664793 0,00076134 0,02920067 ENSMUSG0C Tceal3 A

ENSMUSG000000041650 1965,930976 -0,458164374 0,14404548 -3,1806925 0,00146923 0,0424625 ENSMUSG0C Pcca A

ENSMUSG000000013593 13479,31721 -0,450102638 0,13939412 -3,2289929 0,00124227 0,03856692 ENSMUSG0C Ndufs2 A

ENSMUSG000000044768 2471,310361 -0,443752964 0,13057307 -3,398503 0,00067756 0,02725051 ENSMUSG0C D1Er0622e A

ENSMUSG000000050640 2493,891491 -0,443375349 0,13283238 -3,3393617 0,00083971 0,03104235 ENSMUSG0C Tmem150c L

ENSMUSG000000062444 15990,24913 -0,442435696 0,12901391 -3,5054431 0,00045585 0,02111892 ENSMUSG0C Atp3b2 B

ENSMUSG000000060227 8122,33621 -0,441073421 0,12334367 -3,5759712 0,00034893 0,01759946 ENSMUSG0C Csc4 B

ENSMUSG000000031144 30610,87281 -0,440005673 0,09761056 -4,5077672 6,5513E-06 0,0015971 ENSMUSG0C Syp A

ENSMUSG000000038871 2493,884001 -0,437954344 0,13948483 -3,139799 0,00169064 0,0466363 ENSMUSG0C Bpgm A

ENSMUSG000000044026 3861,957486 -0,435872241 0,13278913 -3,2824391 0,00102913 0,03483701 ENSMUSG0C Slc35g1 A

ENSMUSG000000030659 27855,75041 -0,431009843 0,11132747 -3,8715499 0,00010815 0,00812636 ENSMUSG0C Nuch2 A

ENSMUSG0000

|                     |              |              |            |            |            |            |                       |   |
|---------------------|--------------|--------------|------------|------------|------------|------------|-----------------------|---|
| ENSMUSG00000042203  | 5472,431258  | -0,423803738 | 0,1266124  | -3,3472531 | 0,00081617 | 0,03040838 | ENSMUSG0C Tbc1d22b    | A |
| ENSMUSG00000029467  | 91654,935969 | -0,420004883 | 0,13163128 | -3,1907681 | 0,00141895 | 0,0413992  | ENSMUSG0C Atp2a2      | A |
| ENSMUSG00000032557  | 7881,072312  | -0,416455263 | 0,12993674 | -3,2050617 | 0,00135034 | 0,04025087 | ENSMUSG0C Uba5        | A |
| ENSMUSG00000017764  | 1951,666245  | -0,415361445 | 0,12765493 | -3,253783  | 0,00113879 | 0,03658842 | ENSMUSG0C Zswim1      | C |
| ENSMUSG00000020260  | 14551,26937  | -0,413337849 | 0,11369729 | -3,635424  | 0,00027752 | 0,01520599 | ENSMUSG0C Pofut2      | A |
| ENSMUSG00000066900  | 5646,041715  | -0,412707629 | 0,130862   | -3,1537623 | 0,0016118  | 0,04530275 | ENSMUSG0C Sude3       | A |
| ENSMUSG00000039263  | 8166,600461  | -0,41124954  | 0,10065138 | -4,0858808 | 4,391E-05  | 0,00478835 | ENSMUSG0C Npepl1      | A |
| ENSMUSG00000029629  | 2563,479544  | -0,410790686 | 0,12147788 | -3,3816089 | 0,00072063 | 0,02834773 | ENSMUSG0C Phf14       | A |
| ENSMUSG00000023915  | 4774,617527  | -0,403332537 | 0,12400434 | -3,2525679 | 0,00114367 | 0,03661742 | ENSMUSG0C Trnfrsf21   | A |
| ENSMUSG00000042178  | 4184,20181   | -0,401835106 | 0,12229858 | -3,285689  | 0,00101733 | 0,0346194  | ENSMUSG0C Armc5       | B |
| ENSMUSG00000052942  | 5713,177341  | -0,400983075 | 0,1202595  | -3,3343152 | 0,0008551  | 0,03117295 | ENSMUSG0C Glis3       | A |
| ENSMUSG00000067924  | 4911,838402  | -0,398071725 | 0,09960195 | -3,9966257 | 6,4252E-05 | 0,00598827 | ENSMUSG0C Rtl8b       | A |
| ENSMUSG00000032120  | 7883,8877    | -0,397379363 | 0,10718423 | -3,7074425 | 0,00020936 | 0,01276282 | ENSMUSG0C C2cd2l      | A |
| ENSMUSG00000022769  | 10645,89718  | -0,395391387 | 0,11129131 | -3,5527607 | 0,00038121 | 0,01865366 | ENSMUSG0C Sdf2l1      | A |
| ENSMUSG00000032839  | 2979,579928  | -0,39196468  | 0,11525528 | -3,4008391 | 0,00067179 | 0,0271818  | ENSMUSG0C Trpc1       | A |
| ENSMUSG00000023921  | 2998,880766  | -0,388505658 | 0,09994953 | -3,8870182 | 0,00010148 | 0,00779176 | ENSMUSG0C Mut         | A |
| ENSMUSG00000030780  | 2842,428676  | -0,388439033 | 0,10682712 | -3,6361461 | 0,00027675 | 0,01520599 | ENSMUSG0C BC017158    | B |
| ENSMUSG000000304850 | 12587,35693  | -0,38443241  | 0,11255733 | -3,4154365 | 0,0006368  | 0,02611017 | ENSMUSG0C Tmem127     | A |
| ENSMUSG00000041891  | 50559,83839  | -0,382473545 | 0,10077414 | -3,7953541 | 0,00014743 | 0,00990598 | ENSMUSG0C Lman1       | A |
| ENSMUSG00000029086  | 18314,63456  | -0,380380144 | 0,11619043 | -3,2737649 | 0,00106125 | 0,03529294 | ENSMUSG0C Prom1       | B |
| ENSMUSG00000028976  | 19224,79516  | -0,379554251 | 0,09891521 | -3,8371677 | 0,00012446 | 0,00888115 | ENSMUSG0C Slc2a5      | D |
| ENSMUSG00000057530  | 46918,95336  | -0,375862178 | 0,09537694 | -3,9408077 | 8,1208E-05 | 0,00697732 | ENSMUSG0C Ece1        | A |
| ENSMUSG00000039474  | 21446,12834  | -0,375383165 | 0,1014726  | -3,699355  | 0,00021615 | 0,0130042  | ENSMUSG0C Wfs1        | B |
| ENSMUSG00000020256  | 20384,87856  | -0,373202713 | 0,11684915 | -3,1938846 | 0,00140372 | 0,04121615 | ENSMUSG0C Aldh1l2     | A |
| ENSMUSG00000031634  | 6575,896164  | -0,372847598 | 0,11477619 | -3,2448475 | 0,00116025 | 0,03687281 | ENSMUSG0C Ufsp2       | A |
| ENSMUSG00000070794  | 23405,25567  | -0,370032438 | 0,10471225 | -3,5338026 | 0,00040963 | 0,01970234 | ENSMUSG0C Hapln4      | L |
| ENSMUSG00000061306  | 38242,00441  | -0,367326377 | 0,08790389 | -4,1787274 | 2,9314E-05 | 0,00362201 | ENSMUSG0C Slc38a10    | A |
| ENSMUSG00000041997  | 7979,776404  | -0,367221429 | 0,11385062 | -3,2254672 | 0,00125767 | 0,03886665 | ENSMUSG0C Ttk1        | A |
| ENSMUSG00000018102  | 7365,912236  | -0,360880958 | 0,11308403 | -3,1912637 | 0,00141652 | 0,04139384 | ENSMUSG0C Hist1h2bc   | A |
| ENSMUSG00000028032  | 7794,246647  | -0,35198861  | 0,10154982 | -3,4661666 | 0,00052794 | 0,0233637  | ENSMUSG0C Papss1      | A |
| ENSMUSG00000032575  | 34023,93709  | -0,349883098 | 0,09193823 | -3,8056323 | 0,00014144 | 0,00964427 | ENSMUSG0C Manf        | A |
| ENSMUSG00000022685  | 4281,025535  | -0,348980733 | 0,10111102 | -3,451489  | 0,0005575  | 0,02410638 | ENSMUSG0C Parn        | A |
| ENSMUSG000000303500 | 10383,75467  | -0,347431309 | 0,10108855 | -3,4369006 | 0,00058841 | 0,0251165  | ENSMUSG0C Impdh1      | A |
| ENSMUSG00000032743  | 2602,916463  | -0,34623877  | 0,10607501 | -3,2640936 | 0,00109815 | 0,03590927 | ENSMUSG0C D430042009A | A |
| ENSMUSG00000042298  | 2422,136369  | -0,344725972 | 0,10893669 | -3,1644615 | 0,0015537  | 0,04414145 | ENSMUSG0C Ttc19       | A |
| ENSMUSG00000027230  | 8366,127433  | -0,341784841 | 0,10448123 | -3,2712558 | 0,00107071 | 0,03534136 | ENSMUSG0C Creb3l1     | A |
| ENSMUSG00000043733  | 20117,70888  | -0,341021098 | 0,10586577 | -3,2212592 | 0,00127629 | 0,03902319 | ENSMUSG0C Ptpn11      | A |
| ENSMUSG00000035227  | 26177,87793  | -0,340455569 | 0,09448867 | -3,6031366 | 0,0003144  | 0,01630453 | ENSMUSG0C Spcs2       | A |
| ENSMUSG00000025935  | 29617,13461  | -0,33999618  | 0,09387831 | -3,6216693 | 0,00029271 | 0,01589604 | ENSMUSG0C Tram1       | A |
| ENSMUSG00000002845  | 5684,630611  | -0,332542156 | 0,09342382 | -3,5595009 | 0,00037156 | 0,01848763 | ENSMUSG0C Tmem39a     | N |
| ENSMUSG00000045752  | 7764,694737  | -0,332314013 | 0,10320283 | -3,2200088 | 0,00128187 | 0,03902319 | ENSMUSG0C Tssc4       | A |
| ENSMUSG00000032042  | 69776,49007  | -0,329953801 | 0,08732525 | -3,7784465 | 0,00015781 | 0,01038523 | ENSMUSG0C Srpr        | A |
| ENSMUSG00000029472  | 14016,66516  | -0,319355737 | 0,09521643 | -3,3539984 | 0,00079653 | 0,02998791 | ENSMUSG0C Anapc5      | A |
| ENSMUSG00000026307  | 12454,39985  | -0,308271842 | 0,08476792 | -3,6366569 | 0,0002762  | 0,01520599 | ENSMUSG0C Scly        | A |
| ENSMUSG00000074102  | 4761,144515  | -0,307006184 | 0,09619548 | -3,1914823 | 0,00141545 | 0,04139384 | ENSMUSG0C Rbm15b      | A |
| ENSMUSG00000079487  | 7484,02724   | -0,297935911 | 0,0913629  | -3,2610162 | 0,00111014 | 0,0360222  | ENSMUSG0C Med12       | A |
| ENSMUSG00000028173  | 13310,53768  | -0,295379867 | 0,09378537 | -3,1495302 | 0,00163533 | 0,04568507 | ENSMUSG0C Wls         | A |
| ENSMUSG00000034586  | 27057,80754  | -0,293478881 | 0,09071823 | -3,2350597 | 0,00121617 | 0,03823    | ENSMUSG0C Hid1        | A |
| ENSMUSG00000030282  | 11812,57743  | -0,276735176 | 0,08295817 | -3,33584   | 0,00085042 | 0,03117295 | ENSMUSG0C Cmas        | A |
