# Supplementary material
Source: publisher figshare collection journal article supplement (https://diabetesjournals.figshare.com/articles/dataset/_/22906517)
Supplement: Supplementary file 7 [file 1]

Supp Table S5. Pathway analysis of RNA-sequencing data in pancreatic islets isolated from control E2f1fl/fl and beta-cell specific E2f1beta-/- deficient mice islet

| Upstream Regulator | Expr Log Ratio | Molecule Type                     | Predicted | Activation | Notes | Bias Term | Bias-corrected z-score | p-value of |
|--------------------|----------------|-----------------------------------|-----------|------------|-------|-----------|------------------------|------------|
| ABP1               |                | transcription regulator           | Inhibited | -2.581     | bias  | -0.771    | 0.482                  | 1.7E-11    |
| HNF1A              |                | transcription regulator           | Inhibited | -3.955     | bias  | -0.915    | -0.337                 | 2.33E-10   |
| NEUROD1            |                | transcription regulator           | Inhibited | -2.762     | bias  | -0.947    | -0.145                 | 3.93E-09   |
| DHTRD1             |                | enzyme                            |           |            |       |           |                        | 8.21E-09   |
| PDX1               | -0.576         | transcription regulator           | Inhibited | -2.442     | bias  | -0.795    | -0.501                 | 9.09E-09   |
| NEUROG3            |                | transcription regulator           | Inhibited | -2.423     | bias  | -1        | 0                      | 1.08E-07   |
| FAM6A              |                | transcription regulator           |           |            |       |           |                        | 2.1E-06    |
| PAX6               |                | transcription regulator           |           | -1.759     | bias  | -0.316    | -0.822                 | 4.68E-06   |
| GLIS3              | -0.401         | transcription regulator           |           |            |       |           |                        | 1.18E-05   |
| ERN1               |                | kinase                            | Inhibited | -2.135     | bias  | -0.57     | -0.549                 | 1.21E-05   |
| G protein alpha    |                | group                             | Inhibited | -2.646     | bias  | -0.828    | -0.455                 | 1.27E-05   |
| ERCC1              |                | enzyme                            |           |            |       |           |                        | 1.81E-05   |
| THRA               |                | ligand-dependent nuclear receptor |           | 0.2        |       | -0.132    | 0.489                  | 0.00033    |
| CD38               |                | enzyme                            | Inhibited | -2.804     | bias  | -0.907    | -0.262                 | 3.72E-05   |
| BAD                |                | other                             |           |            |       |           |                        | 6.58E-05   |
| NKX2-2             |                | transcription regulator           |           |            |       |           |                        | 8.32E-05   |
| CGA                |                | other                             |           | 0.896      |       | 0.103     | 0.645                  | 9.42E-05   |
| TGFA               |                | transcription regulator           |           | -1.263     |       | -0.237    | -0.515                 | 9.63E-05   |
| PCSK2              |                | peptidase                         |           |            |       |           |                        | 0.00011    |
| MAFA               |                | transcription regulator           |           |            |       |           |                        | 0.000142   |
| MED1               |                | transcription regulator           | Inhibited | -2.2       | bias  | -0.905    | -0.21                  | 0.000146   |
| MGAT4A             |                | enzyme                            |           |            |       |           |                        | 0.000196   |
| METTL4             |                | enzyme                            |           |            |       |           |                        | 0.000224   |
| TGFB               |                | transcription regulator           | Inhibited | -2.779     | bias  | -0.446    | -1.54                  | 0.000256   |
| ACACB              |                | enzyme                            |           |            |       |           |                        | 0.000274   |
| SLC13A5            |                | transporter                       |           |            |       |           |                        | 0.00039    |
| SOX6               |                | transcription regulator           |           |            |       |           |                        | 0.000395   |
| MAP4K4             |                | kinase                            |           | 0.816      | bias  | 0.932     | -1.466                 | 0.000395   |
| SPOP               |                | other                             |           |            |       |           |                        | 0.000466   |
| LEP                |                | growth factor                     |           | -0.333     |       | -0.202    | 0.222                  | 0.000479   |
| ATF6               |                | transcription regulator           |           |            |       |           |                        | 0.000486   |
| Histone h3         |                | group                             |           |            |       |           |                        | 0.000507   |
| ISL1               |                | transcription regulator           | Inhibited | -2.213     |       | -0.146    | -1.889                 | 0.000554   |
| HTT                |                | transcription regulator           |           |            |       |           |                        | 0.000577   |
| SREBF1             |                | transcription regulator           |           | -1.801     | bias  | -0.739    | 0.382                  | 0.000606   |
| OGT                |                | enzyme                            |           | -0.277     |       | 0.125     | -0.451                 | 0.000618   |
| CEL                |                | enzyme                            |           |            |       |           |                        | 0.000647   |
| TAF10              |                | transcription regulator           |           |            |       |           |                        | 0.000647   |
| TRPC3              |                | ion channel                       |           |            |       |           |                        | 0.000647   |
| IL5                |                | cytokine                          | Inhibited | -2.646     | bias  | -0.956    | -0.118                 | 0.000716   |
| PRLR               | -0.983         | transmembrane receptor            |           |            |       |           |                        | 0.000944   |
| SST                |                | other                             |           |            |       |           |                        | 0.000944   |
| ERCC3              |                | enzyme                            |           |            |       |           |                        | 0.000966   |
| ERCC4              |                | enzyme                            |           |            |       |           |                        | 0.000966   |
| GHR                | -0.488         | transmembrane receptor            |           |            |       |           |                        | 0.00127    |
| NTRK2              | -0.677         | kinase                            |           |            |       |           |                        | 0.00127    |
| FGFR4              |                | kinase                            |           |            |       |           |                        | 0.00134    |
| Hedgehog           |                | group                             |           |            |       |           |                        | 0.00134    |
| CNTN1              |                | transcription regulator           |           |            |       |           |                        | 0.00134    |
| SHCBP1             |                | other                             |           |            |       |           |                        | 0.00134    |
| SLC2A2             |                | transporter                       |           |            |       |           |                        | 0.00134    |
| TRH                |                | other                             |           |            |       |           |                        | 0.00134    |
| P2RY14             |                | G-protein coupled receptor        |           |            |       |           |                        | 0.00149    |
| ATP5IF1            |                | other                             |           |            |       |           |                        | 0.00173    |
| CCDC80             |                | other                             |           |            |       |           |                        | 0.00178    |
| Calcineurin A      |                | group                             |           |            |       |           |                        | 0.00178    |
| MUC1               |                | other                             |           | -1.044     | bias  | -0.472    | -0.104                 | 0.00184    |
| BSCL2              |                | other                             |           |            |       |           |                        | 0.00195    |
| PHF21A             |                | other                             |           |            |       |           |                        | 0.00228    |
| SHANK3             |                | other                             |           |            |       |           |                        | 0.00228    |
| PTCH1              |                | transmembrane receptor            |           |            |       |           |                        | 0.00241    |
| CK3DL1             |                | cytokine                          |           |            |       |           |                        | 0.00255    |
| FGF3               |                | growth factor                     |           | -0.485     |       | -0.171    | -0.152                 | 0.00255    |
| PPARG              |                | ligand-dependent nuclear receptor | Inhibited | -2.917     | bias  | -0.342    | -1.92                  | 0.00278    |
| LAMTOR5            |                | other                             |           |            |       |           |                        | 0.00284    |
| RELN               |                | peptidase                         |           |            |       |           |                        | 0.00284    |
| DIO3               |                | enzyme                            |           | -1.741     |       | 0.135     | -2.066                 | 0.00297    |
| CAV1               |                | transmembrane receptor            |           |            |       |           |                        | 0.00302    |
| NR1A1              |                | ligand-dependent nuclear receptor | Activated | 2.449      |       | 0.246     | 1.847                  | 0.00311    |
| CCAR2              |                | peptidase                         |           |            |       |           |                        | 0.00335    |
| THRB               |                | ligand-dependent nuclear receptor |           | -0.659     |       | -0.079    | -0.484                 | 0.00342    |
| DLX6-AS1           |                | other                             |           |            |       |           |                        | 0.00345    |
| KL8                |                | enzyme                            |           |            |       |           |                        | 0.00345    |
| NR2C2              |                | ligand-dependent nuclear receptor |           |            |       |           |                        | 0.00345    |
| TAF1               |                | transcription regulator           |           |            |       |           |                        | 0.00345    |
| TAF5               |                | transcription regulator           |           |            |       |           |                        | 0.00345    |
| NCOA1              |                | transcription regulator           |           | 1          | bias  | 0.415     | 0.17                   | 0.0036     |
| IRS2               |                | enzyme                            |           |            |       |           |                        | 0.00362    |
| TGSI               |                | enzyme                            |           |            |       |           |                        | 0.0039     |
| GIC                |                | transcription regulator           |           |            |       |           |                        | 0.00411    |
| INHBB              |                | growth factor                     |           |            |       |           |                        | 0.00411    |
| NKX6-1             | -0.538         | transcription regulator           |           |            |       |           |                        | 0.00411    |
| STK24              |                | kinase                            |           |            |       |           |                        | 0.00411    |
| PTTG1              |                | transcription regulator           |           | 1.067      | bias  | 0.487     | 0.102                  | 0.00414    |
| Histone h4         |                | group                             |           |            |       |           |                        | 0.00439    |
| F2                 |                | peptidase                         |           |            |       |           |                        | 0.00449    |
| FFAR3              |                | G-protein coupled receptor        |           |            |       |           |                        | 0.00484    |
| RNF40              |                | enzyme                            |           |            |       |           |                        | 0.00484    |
| STK11              |                | kinase                            |           | -0.447     |       | -0.202    | 0.005                  | 0.00544    |
| MEN1               |                | transcription regulator           |           |            |       |           |                        | 0.00548    |
| EPICAM             |                | other                             |           |            |       |           |                        | 0.00561    |
| PIK3CB             |                | kinase                            |           |            |       |           |                        | 0.00561    |
| TM6IM6             |                | other                             |           |            |       |           |                        | 0.00561    |
| PTX2               |                | transcription regulator           | Inhibited | -2         | bias  | -0.553    | -0.895                 | 0.0058     |
| MED13              |                | transcription regulator           |           |            |       |           |                        | 0.00621    |
| MAP2K2             |                | kinase                            |           |            |       |           |                        | 0.00644    |
| MAPK13             |                | kinase                            |           |            |       |           |                        | 0.00644    |
| NAE1               |                | enzyme                            |           |            |       |           |                        | 0.00644    |
| PRKDC              |                | kinase                            |           |            |       |           |                        | 0.00644    |
| RBMS-AS1           |                | other                             |           |            |       |           |                        | 0.00644    |
| SMC1A              |                | transporter                       |           |            |       |           |                        | 0.007      |
| MAZ                |                | transcription regulator           |           |            |       |           |                        | 0.00732    |
| STMN1              |                | other                             |           |            |       |           |                        | 0.00732    |
| FGF21              |                | growth factor                     |           |            |       |           |                        | 0.00741    |
| GYP19A1            |                | enzyme                            |           | -1.729     |       | -0.089    | -1.576                 | 0.00758    |
| FOXA2              |                | transcription regulator           | Inhibited | -2.219     |       | -0.206    | -1.762                 | 0.00772    |
| S430416N02Rk       |                | other                             |           |            |       |           |                        | 0.00813    |
| ABCC5              |                | transporter                       |           |            |       |           |                        | 0.00813    |
| ABHD11             |                | enzyme                            |           |            |       |           |                        | 0.00813    |
| AIDA               |                | other                             |           |            |       |           |                        | 0.00813    |
| ALG10              |                | enzyme                            |           |            |       |           |                        | 0.00813    |
| ALG5               |                | enzyme                            |           |            |       |           |                        | 0.00813    |
| ALG6               |                | enzyme                            |           |            |       |           |                        | 0.00813    |
| ALG8               |                | enzyme                            |           |            |       |           |                        | 0.00813    |
| ARFGEF3            |                | other                             |           |            |       |           |                        | 0.00813    |
| BAIAP2L1           |                | other                             |           |            |       |           |                        | 0.00813    |
| CALCOCO1           |                | transcription regulator           |           |            |       |           |                        | 0.00813    |
| COL5A3             |                | other                             |           |            |       |           |                        | 0.00813    |
| CSH1/CSH2          |                | other                             |           |            |       |           |                        | 0.00813    |
| CXXC4              |                | other                             |           |            |       |           |                        | 0.00813    |
| Ces1b/Ces1c        |                | enzyme                            |           |            |       |           |                        | 0.00813    |
| DDOST              |                | enzyme                            |           |            |       |           |                        | 0.00813    |
| DRAXIN             |                | other                             |           |            |       |           |                        | 0.00813    |
| ENHO               | -0.613         | enzyme                            |           |            |       |           |                        | 0.00813    |
| FBXO31             |                | enzyme                            |           |            |       |           |                        | 0.00813    |
| FBXO4              |                | enzyme                            |           |            |       |           |                        | 0.00813    |
| FKHR               |                | group                             |           |            |       |           |                        | 0.00813    |
| FRMPD1             |                | other                             |           |            |       |           |                        | 0.00813    |
| FXN                |                | kinase                            |           |            |       |           |                        | 0.00813    |
| GPR142             |                | G-protein coupled receptor        |           |            |       |           |                        | 0.00813    |
| HADH               | -0.812         | enzyme                            |           |            |       |           |                        | 0.00813    |
| HADHA              |                | enzyme                            |           |            |       |           |                        | 0.00813    |
| INSRR              |                | kinase                            |           |            |       |           |                        | 0.00813    |
| KHK                |                | kinase                            |           |            |       |           |                        | 0.00813    |
| UNC01370           |                | other                             |           |            |       |           |                        | 0.00813    |
| MARK3              |                | kinase                            |           |            |       |           |                        | 0.00813    |
| MGAT4C             |                | enzyme                            |           |            |       |           |                        | 0.00813    |

|                         |        |                            |           |        |        |        |        |         |
|-------------------------|--------|----------------------------|-----------|--------|--------|--------|--------|---------|
| IKR1                    |        | enzyme                     |           |        |        |        |        | 0.00813 |
| MOGS                    |        | enzyme                     |           |        |        |        |        | 0.00813 |
| Mannosidase2            |        | group                      |           |        |        |        |        | 0.00813 |
| Mkm1                    |        | enzyme                     |           |        |        |        |        | 0.00813 |
| NNAT                    |        | transporter                |           |        |        |        |        | 0.00813 |
| PQB1                    |        | transcription regulator    |           |        |        |        |        | 0.00813 |
| PHPT1                   |        | phosphatase                |           |        |        |        |        | 0.00813 |
| PLAC1                   |        | other                      |           |        |        |        |        | 0.00813 |
| PNLIP                   |        | enzyme                     |           |        |        |        |        | 0.00813 |
| RHAG                    |        | peptidase                  |           |        |        |        |        | 0.00813 |
| RHOXF2/RHOXF2B          |        | transcription regulator    |           |        |        |        |        | 0.00813 |
| Rac                     |        | group                      |           |        |        |        |        | 0.00813 |
| Rhox11                  |        | other                      |           |        |        |        |        | 0.00813 |
| Rhox8                   |        | other                      |           |        |        |        |        | 0.00813 |
| SLC17A9                 | -0.546 | transporter                |           |        |        |        |        | 0.00813 |
| SLC19A2                 |        | transporter                |           |        |        |        |        | 0.00813 |
| SLC30A8                 |        | transporter                |           |        |        |        |        | 0.00813 |
| SLCSA1                  |        | transporter                |           |        |        |        |        | 0.00813 |
| SLCSA10                 |        | transporter                |           |        |        |        |        | 0.00813 |
| SLC9B2                  |        | transporter                |           |        |        |        |        | 0.00813 |
| TOB2                    |        | other                      |           |        |        |        |        | 0.00813 |
| UBE2D3                  |        | enzyme                     |           |        |        |        |        | 0.00813 |
| UCN3                    |        | other                      |           |        |        |        |        | 0.00813 |
| WDR13                   |        | other                      |           |        |        |        |        | 0.00813 |
| mic-500                 |        | microma                    |           |        |        |        |        | 0.00815 |
| DNMT3B                  |        | enzyme                     | 0.447     | bias   | 0.456  |        | -0.572 | 0.00815 |
| AQP7                    |        | transporter                |           |        |        |        |        | 0.00825 |
| ATR                     |        | kinase                     |           |        |        |        |        | 0.00825 |
| ITM2                    |        | enzyme                     |           |        |        |        |        | 0.00825 |
| IGFBP5                  | -0.747 | other                      |           |        |        |        |        | 0.00825 |
| RPS6KA3                 |        | kinase                     |           |        |        |        |        | 0.00825 |
| FMR1                    |        | translation regulator      | 1.34      | bias   | 0.339  |        | 0.59   | 0.00883 |
| MBD1                    |        | transcription regulator    |           |        |        |        |        | 0.00924 |
| RAPGEF3                 |        | other                      |           |        |        |        |        | 0.00924 |
| RASSF1                  |        | other                      |           |        |        |        |        | 0.00924 |
| IGF1R                   |        | transmembrane receptor     | Inhibited | -2.577 | bias   | -0.629 |        | -0.955  |
| MFAP5                   |        | other                      |           |        |        |        |        | 0.00968 |
| ELL2                    |        | transcription regulator    |           |        |        |        |        | 0.0107  |
| PTPN11                  | -0.341 | phosphatase                |           |        |        |        |        | 0.0107  |
| SMARCA2                 |        | transcription regulator    |           |        |        |        |        | 0.0107  |
| NFATC1                  |        | transcription regulator    |           |        |        |        |        | 0.0112  |
| ATXN1                   |        | transcription regulator    |           |        |        |        |        | 0.0113  |
| MED30                   |        | transcription regulator    |           |        |        |        |        | 0.0113  |
| SPZ1                    |        | transcription regulator    |           |        |        |        |        | 0.0113  |
| IL6ST                   |        | transmembrane receptor     |           |        |        |        |        | 0.0123  |
| miR-30c-5p (and other m |        | mature microma             |           |        |        |        |        | 0.0123  |
| NFB (complex)           |        | complex                    | Inhibited | -2.588 | bias   | -0.837 |        | -0.421  |
| KAT2A                   |        | enzyme                     | Inhibited | -2     | bias   | -0.446 |        | -1.107  |
| LDLR                    |        | transporter                |           |        |        |        |        | 0.0145  |
| MYCN                    |        | transcription regulator    |           |        |        |        |        | 0.0145  |
| LCAT                    |        | enzyme                     |           |        |        |        |        | 0.0149  |
| MPZ                     |        | other                      |           |        |        |        |        | 0.0149  |
| SREBF2                  |        | transcription regulator    |           |        |        |        |        | 0.016   |
| IGF1                    |        | growth factor              | -0.841    | bias   | -0.329 |        |        | -0.136  |
| Akr1b7                  |        | enzyme                     |           |        |        |        |        | 0.0162  |
| BCAT2                   |        | enzyme                     |           |        |        |        |        | 0.0162  |
| BCLAF1                  |        | transcription regulator    |           |        |        |        |        | 0.0162  |
| CALM1 (includes others  |        | other                      |           |        |        |        |        | 0.0162  |
| CDC27                   |        | other                      |           |        |        |        |        | 0.0162  |
| CERT1                   |        | kinase                     |           |        |        |        |        | 0.0162  |
| Ces1g                   |        | enzyme                     |           |        |        |        |        | 0.0162  |
| DAPK3                   |        | kinase                     |           |        |        |        |        | 0.0162  |
| EIF4H                   |        | translation regulator      |           |        |        |        |        | 0.0162  |
| GCKR                    |        | other                      |           |        |        |        |        | 0.0162  |
| GOPC                    |        | transporter                |           |        |        |        |        | 0.0162  |
| GPC3                    |        | other                      |           |        |        |        |        | 0.0162  |
| GPD2                    |        | enzyme                     |           |        |        |        |        | 0.0162  |
| GPR119                  |        | g-protein coupled receptor |           |        |        |        |        | 0.0162  |
| GPR68                   |        | g-protein coupled receptor |           |        |        |        |        | 0.0162  |
| INS3                    |        | growth factor              |           |        |        |        |        | 0.0162  |
| IP6K1                   |        | kinase                     |           |        |        |        |        | 0.0162  |
| KCNQ2                   |        | ion channel                |           |        |        |        |        | 0.0162  |
| LCLAT1                  |        | enzyme                     |           |        |        |        |        | 0.0162  |
| LRIG3                   |        | other                      |           |        |        |        |        | 0.0162  |
| NEIL1                   |        | enzyme                     |           |        |        |        |        | 0.0162  |
| NPFFR2                  |        | g-protein coupled receptor |           |        |        |        |        | 0.0162  |
| PAPPA                   |        | peptidase                  |           |        |        |        |        | 0.0162  |
| PARL                    |        | peptidase                  |           |        |        |        |        | 0.0162  |
| PASK                    |        | kinase                     |           |        |        |        |        | 0.0162  |
| PDHA1                   |        | enzyme                     |           |        |        |        |        | 0.0162  |
| PLAAT3                  |        | enzyme                     |           |        |        |        |        | 0.0162  |
| PRDX3                   |        | enzyme                     |           |        |        |        |        | 0.0162  |
| PRLH                    |        | cytokine                   |           |        |        |        |        | 0.0162  |
| PTPRF                   |        | phosphatase                |           |        |        |        |        | 0.0162  |
| REM2                    |        | enzyme                     |           |        |        |        |        | 0.0162  |
| RPRD1B                  |        | other                      |           |        |        |        |        | 0.0162  |
| RRAD                    |        | enzyme                     |           |        |        |        |        | 0.0162  |
| SLC9A6                  |        | transporter                |           |        |        |        |        | 0.0162  |
| SLURP1                  |        | cytokine                   |           |        |        |        |        | 0.0162  |
| SNCB                    |        | other                      |           |        |        |        |        | 0.0162  |
| SNIP1                   |        | other                      |           |        |        |        |        | 0.0162  |
| SRI                     |        | transporter                |           |        |        |        |        | 0.0162  |
| SRPK2                   |        | kinase                     |           |        |        |        |        | 0.0162  |
| STX4                    |        | transporter                |           |        |        |        |        | 0.0162  |
| Slk                     |        | group                      |           |        |        |        |        | 0.0162  |
| TP53INP1                |        | other                      |           |        |        |        |        | 0.0162  |
| VICAM1                  |        | transmembrane receptor     |           |        |        |        |        | 0.0162  |
| VENTX                   |        | transcription regulator    |           |        |        |        |        | 0.0162  |
| ZNF322                  |        | transcription regulator    |           |        |        |        |        | 0.0162  |
| miR-101-5p (miRNAs w/o  |        | mature microma             |           |        |        |        |        | 0.0162  |
| miR-185-3p (and other m |        | mature microma             |           |        |        |        |        | 0.0162  |
| miR-501-3p (and other m |        | mature microma             |           |        |        |        |        | 0.0162  |
| p38 Sapk                |        | group                      |           |        |        |        |        | 0.0162  |
| ARNTL                   |        | transcription regulator    |           |        |        |        |        | 0.0166  |
| BCL2L11                 |        | other                      |           |        |        |        |        | 0.0175  |
| FGF19                   |        | growth factor              |           |        |        |        |        | 0.0175  |
| JARID2                  |        | transcription regulator    |           |        |        |        |        | 0.0175  |
| RNF20                   |        | enzyme                     |           |        |        |        |        | 0.0175  |
| BDNF                    |        | growth factor              |           |        |        |        |        | 0.0177  |
| DNMT3A                  |        | enzyme                     | 0.152     |        | 0.2    |        | -0.244 | 0.0186  |
| CASR                    |        | g-protein coupled receptor | Inhibited | -2     | bias   | -0.593 |        | -0.813  |
| GPBAR1                  |        | g-protein coupled receptor |           |        |        |        |        | 0.0188  |
| WNT1                    |        | cytokine                   |           |        |        |        |        | 0.0216  |
| ADIPOQ                  |        | other                      | -0.413    |        | -0.178 |        | -0.081 | 0.0218  |
| CRTC2                   |        | other                      |           |        |        |        |        | 0.0231  |
| RPS6KB1                 |        | kinase                     |           |        |        |        |        | 0.0231  |
| TCF7L2                  |        | transcription regulator    | Inhibited | -2.592 | bias   | -0.88  |        | -0.312  |
| AGAP2                   |        | enzyme                     |           |        |        |        |        | 0.0242  |
| ANK1                    |        | other                      |           |        |        |        |        | 0.0242  |
| ATAD2                   |        | enzyme                     |           |        |        |        |        | 0.0242  |
| ATOX1                   |        | transporter                |           |        |        |        |        | 0.0242  |
| BANP                    |        | other                      |           |        |        |        |        | 0.0242  |
| CACNA1B                 |        | ion channel                |           |        |        |        |        | 0.0242  |
| CARTPT                  |        | other                      |           |        |        |        |        | 0.0242  |
| DACT3                   |        | other                      |           |        |        |        |        | 0.0242  |
| DNAJB4                  |        | other                      |           |        |        |        |        | 0.0242  |
| FLOT1                   |        | other                      |           |        |        |        |        | 0.0242  |
| FREM1                   |        | other                      |           |        |        |        |        | 0.0242  |
| GN37                    |        | enzyme                     |           |        |        |        |        | 0.0242  |
| GPC6                    |        | transmembrane receptor     |           |        |        |        |        | 0.0242  |
| GRIP1                   |        | transcription regulator    |           |        |        |        |        | 0.0242  |
| HINT2                   |        | enzyme                     |           |        |        |        |        | 0.0242  |
| HOXB13                  |        | transcription regulator    |           |        |        |        |        | 0.0242  |
| HSPBP1                  |        | other                      |           |        |        |        |        | 0.0242  |
| INPP5K                  |        | phosphatase                |           |        |        |        |        | 0.0242  |
| Isa4                    |        | other                      |           |        |        |        |        | 0.0242  |
| KLHL2                   |        | other                      |           |        |        |        |        | 0.0242  |
| KMT2B                   |        | transcription regulator    |           |        |        |        |        | 0.0242  |
| LHX5                    |        | transcription regulator    |           |        |        |        |        | 0.0242  |
| LINC01006               |        | other                      |           |        |        |        |        | 0.0242  |
| MAT2B                   |        | enzyme                     |           |        |        |        |        | 0.0242  |
| MBD5                    |        | other                      |           |        |        |        |        | 0.0242  |

|           |        |                            |             |        |        |  |        |
|-----------|--------|----------------------------|-------------|--------|--------|--|--------|
| MOHR1     |        | g-protein coupled receptor |             |        |        |  | 0.0242 |
| MOGAT2    |        | enzyme                     |             |        |        |  | 0.0242 |
| NDUFAF3   |        | other                      |             |        |        |  | 0.0242 |
| NIBAN2    |        | transcription regulator    |             |        |        |  | 0.0242 |
| NOP58     |        | enzyme                     |             |        |        |  | 0.0242 |
| NPTX1     |        | other                      |             |        |        |  | 0.0242 |
| NSD3      |        | enzyme                     |             |        |        |  | 0.0242 |
| NUCKS1    |        | kinase                     |             |        |        |  | 0.0242 |
| OLA1      |        | enzyme                     |             |        |        |  | 0.0242 |
| PSMD14    |        | peptidase                  |             |        |        |  | 0.0242 |
| PTGDS     |        | enzyme                     |             |        |        |  | 0.0242 |
| PTTG1IP   |        | other                      |             |        |        |  | 0.0242 |
| RAD50     |        | enzyme                     |             |        |        |  | 0.0242 |
| RANBP9    |        | other                      |             |        |        |  | 0.0242 |
| RDH16     |        | enzyme                     |             |        |        |  | 0.0242 |
| RIMS2     |        | other                      |             |        |        |  | 0.0242 |
| SERP1     |        | other                      |             |        |        |  | 0.0242 |
| SERTAD1   |        | transcription regulator    |             |        |        |  | 0.0242 |
| SH2B2     |        | other                      |             |        |        |  | 0.0242 |
| SLC39A4   |        | transporter                |             |        |        |  | 0.0242 |
| SNW1      |        | transcription regulator    |             |        |        |  | 0.0242 |
| SRGAP1    |        | other                      |             |        |        |  | 0.0242 |
| THRSF     |        | other                      |             |        |        |  | 0.0242 |
| UZAF2     |        | other                      |             |        |        |  | 0.0242 |
| WAPL      |        | other                      |             |        |        |  | 0.0242 |
| WIF1      |        | other                      |             |        |        |  | 0.0242 |
| ZIC1      |        | transcription regulator    |             |        |        |  | 0.0242 |
| EGF       |        | growth factor              |             |        |        |  | 0.0245 |
| ADAM10    |        | peptidase                  |             |        |        |  | 0.0246 |
| BTG2      |        | transcription regulator    |             |        |        |  | 0.0246 |
| GTF2B     |        | transcription regulator    |             |        |        |  | 0.0246 |
| SFRP1     |        | transmembrane receptor     |             |        |        |  | 0.0246 |
| RETNLB    |        | other                      |             |        |        |  | 0.0258 |
| ROR2      |        | kinase                     |             |        |        |  | 0.0258 |
| Hmgdh3    |        | other                      |             |        |        |  | 0.0262 |
| JH1       |        | enzyme                     |             |        |        |  | 0.0262 |
| TCF       |        | group                      |             |        |        |  | 0.0267 |
| INS       | -0.71  | other                      | -0.277      | -0.041 | -0.197 |  | 0.0276 |
| Nr1h      |        | group                      | 0.152 bias  | 0.382  | -0.606 |  | 0.0276 |
| A2M       |        | transporter                |             |        |        |  | 0.0278 |
| CTNNA1    |        | transcription regulator    | -1.147 bias | -0.507 | -0.152 |  | 0.0278 |
| EIF2AK3   |        | kinase                     | -1.989 bias | -0.843 | -0.31  |  | 0.0283 |
| HIF1A     |        | transcription regulator    | -1.352 bias | -0.444 | -0.198 |  | 0.0292 |
| CXCR4     |        | g-protein coupled receptor |             |        |        |  | 0.0294 |
| DLK1      |        | other                      |             |        |        |  | 0.0311 |
| RAF1      |        | kinase                     |             |        |        |  | 0.0311 |
| MAPK1     |        | kinase                     | -0.816      | 0.088  | -1.033 |  | 0.0321 |
| ADRA2B    |        | g-protein coupled receptor |             |        |        |  | 0.0321 |
| AGAP2-AS1 |        | other                      |             |        |        |  | 0.0321 |
| AGTRAP    |        | g-protein coupled receptor |             |        |        |  | 0.0321 |
| AKAP5     |        | other                      |             |        |        |  | 0.0321 |
| AP2M1     |        | other                      |             |        |        |  | 0.0321 |
| ARF1      |        | enzyme                     |             |        |        |  | 0.0321 |
| ATP2A1    |        | transporter                |             |        |        |  | 0.0321 |
| BRS3      |        | g-protein coupled receptor |             |        |        |  | 0.0321 |
| CACNA1D   |        | ion channel                |             |        |        |  | 0.0321 |
| CDC25B    |        | phosphatase                |             |        |        |  | 0.0321 |
| CHP       |        | other                      |             |        |        |  | 0.0321 |
| CPT1      |        | group                      |             |        |        |  | 0.0321 |
| Cathepsin |        | group                      |             |        |        |  | 0.0321 |
| DDX19B    |        | enzyme                     |             |        |        |  | 0.0321 |
| DKK2      |        | other                      |             |        |        |  | 0.0321 |
| FFAR2     |        | g-protein coupled receptor |             |        |        |  | 0.0321 |
| GALR1     | -0.816 | g-protein coupled receptor |             |        |        |  | 0.0321 |
| GH2       |        | other                      |             |        |        |  | 0.0321 |
| IGFBP4    |        | other                      |             |        |        |  | 0.0321 |
| ITPRID2   |        | other                      |             |        |        |  | 0.0321 |
| IIS3      |        | other                      |             |        |        |  | 0.0321 |
| KRT10     |        | other                      |             |        |        |  | 0.0321 |
| LAMB1     |        | other                      |             |        |        |  | 0.0321 |
| MIR3662   |        | microma                    |             |        |        |  | 0.0321 |
| MUCL1     |        | other                      |             |        |        |  | 0.0321 |
| MYBPC3    |        | other                      |             |        |        |  | 0.0321 |
| NASP      |        | other                      |             |        |        |  | 0.0321 |
| NR2F1-AS1 |        | other                      |             |        |        |  | 0.0321 |
| ORAI3     |        | other                      |             |        |        |  | 0.0321 |
| PITPNA    |        | transporter                |             |        |        |  | 0.0321 |
| PPP1R3C   |        | phosphatase                |             |        |        |  | 0.0321 |
| PRKAB2    |        | kinase                     |             |        |        |  | 0.0321 |
| RAB11A    |        | enzyme                     |             |        |        |  | 0.0321 |
| SEMA3E    |        | other                      |             |        |        |  | 0.0321 |
| SGMS1     |        | enzyme                     |             |        |        |  | 0.0321 |
| SHBG      |        | other                      |             |        |        |  | 0.0321 |
| SIDT2     |        | transporter                |             |        |        |  | 0.0321 |
| SLC2A8    |        | transporter                |             |        |        |  | 0.0321 |
| SLC11B3   |        | transporter                |             |        |        |  | 0.0321 |
| SNRK      |        | kinase                     |             |        |        |  | 0.0321 |
| STEAP4    |        | enzyme                     |             |        |        |  | 0.0321 |
| SUFU      |        | transcription regulator    |             |        |        |  | 0.0321 |
| TACS1D2   |        | other                      |             |        |        |  | 0.0321 |
| TBC1D4    |        | other                      |             |        |        |  | 0.0321 |
| TCF1EF    |        | group                      |             |        |        |  | 0.0321 |
| TEX11     |        | other                      |             |        |        |  | 0.0321 |
| VTGN1     |        | other                      |             |        |        |  | 0.0321 |
| ZFP42     |        | transcription regulator    |             |        |        |  | 0.0321 |
| mi-184    |        | microma                    |             |        |        |  | 0.0321 |
| GSK3B     |        | kinase                     |             |        |        |  | 0.0321 |
| IGF2      |        | growth factor              |             |        |        |  | 0.0328 |
| Mapk      |        | group                      |             |        |        |  | 0.0328 |
| FOXA1     |        | transcription regulator    | -1.982      | 0.02   | -2.023 |  | 0.0329 |
| HMGAI     |        | transcription regulator    |             |        |        |  | 0.0341 |
| PTH       |        | other                      |             |        |        |  | 0.0341 |
| SMAD2     |        | transcription regulator    |             |        |        |  | 0.0341 |
| PDPK1     |        | kinase                     |             |        |        |  | 0.0364 |
| GLI1      |        | transcription regulator    | -0.227      | 0.204  | -0.792 |  | 0.0369 |
| IL10RA    |        | transmembrane receptor     | -1.633      | -0.024 | -1.575 |  | 0.0369 |
| DSCAML1   |        | other                      |             |        |        |  | 0.0371 |
| GH1       |        | growth factor              |             |        |        |  | 0.0382 |
| KDM3A     |        | transcription regulator    |             |        |        |  | 0.0382 |
| MLX       |        | transcription regulator    |             |        |        |  | 0.0382 |
| MYBL2     |        | transcription regulator    |             |        |        |  | 0.0382 |
| mi-30     |        | microma                    |             |        |        |  | 0.0382 |
| SLC13A1   |        | transporter                |             |        |        |  | 0.0392 |
| ACACA     |        | enzyme                     |             |        |        |  | 0.04   |
| AKIRIN2   |        | other                      |             |        |        |  | 0.04   |
| APBB1     |        | transcription regulator    |             |        |        |  | 0.04   |
| ARAF      |        | kinase                     |             |        |        |  | 0.04   |
| AXIN1     |        | other                      |             |        |        |  | 0.04   |
| CDH16     |        | enzyme                     |             |        |        |  | 0.04   |
| CHRM3     |        | g-protein coupled receptor |             |        |        |  | 0.04   |
| CXCL14    |        | cytokine                   |             |        |        |  | 0.04   |
| FZR1      |        | kinase                     |             |        |        |  | 0.04   |
| GATM      |        | enzyme                     |             |        |        |  | 0.04   |
| GNAS1     |        | enzyme                     |             |        |        |  | 0.04   |
| GPR39     |        | g-protein coupled receptor |             |        |        |  | 0.04   |
| GY2       |        | enzyme                     |             |        |        |  | 0.04   |
| HCFC1     |        | transcription regulator    |             |        |        |  | 0.04   |
| HINFP     |        | transcription regulator    |             |        |        |  | 0.04   |
| HTR2C     |        | g-protein coupled receptor |             |        |        |  | 0.04   |
| INSL5     |        | other                      |             |        |        |  | 0.04   |
| LGALS12   | -0.797 | other                      |             |        |        |  | 0.04   |
| MIR3936HG |        | other                      |             |        |        |  | 0.04   |
| Muc1      |        | transmembrane receptor     |             |        |        |  | 0.04   |
| NDN       |        | transcription regulator    |             |        |        |  | 0.04   |
| Nesdh     |        | other                      |             |        |        |  | 0.04   |
| PITX1     |        | transcription regulator    |             |        |        |  | 0.04   |
| PORCN     |        | enzyme                     |             |        |        |  | 0.04   |
| PRMT2     |        | enzyme                     |             |        |        |  | 0.04   |
| PXN       |        | other                      |             |        |        |  | 0.04   |
| RAD51C    |        | enzyme                     |             |        |        |  | 0.04   |
| RBBP8     |        | enzyme                     |             |        |        |  | 0.04   |
| RNF187    |        | enzyme                     |             |        |        |  | 0.04   |

|                        |        |                            |             |            |        |       |        |
|------------------------|--------|----------------------------|-------------|------------|--------|-------|--------|
| RUVBL2                 |        | transcription regulator    |             |            |        |       | 0.04   |
| SIX3                   |        | transcription regulator    |             |            |        |       | 0.04   |
| STX2                   |        | transporter                |             |            |        |       | 0.04   |
| TPPP2                  |        | other                      |             |            |        |       | 0.04   |
| WFS1                   | -0.375 | enzyme                     |             |            |        |       | 0.04   |
| WNT7B                  |        | other                      |             |            |        |       | 0.04   |
| WRN                    |        | enzyme                     |             |            |        |       | 0.04   |
| ZMY2                   |        | transcription regulator    |             |            |        |       | 0.04   |
| miR-193a-3p (and other |        | mature microma             |             |            |        |       | 0.04   |
| miR-455-3p (miRNAs w/  |        | mature microma             |             |            |        |       | 0.04   |
| miR-455                |        | microma                    |             |            |        |       | 0.04   |
| miR-489                |        | microma                    |             |            |        |       | 0.04   |
| HDL-cholesterol        |        | complex                    |             |            |        |       | 0.04   |
| LGALS3                 |        | other                      |             |            |        |       | 0.0403 |
| CYP11A1                |        | enzyme                     |             |            |        |       | 0.0414 |
| CYP27B1                |        | enzyme                     |             |            |        |       | 0.0419 |
| DRD2                   |        | g-protein coupled receptor |             |            |        |       | 0.0419 |
| AKT1                   |        | kinase                     |             |            |        |       | 0.0425 |
| OSCAM                  |        | other                      |             |            |        |       | 0.0425 |
| TSC2                   |        | other                      |             |            |        |       | 0.0427 |
| EGFR                   |        | kinase                     | -1.503 bias | -0.714     | 0.061  |       | 0.0427 |
| MECP2                  |        | transcription regulator    |             |            |        |       | 0.0435 |
| SLC25A13               |        | transporter                |             |            |        |       | 0.0435 |
| PIK3CA                 |        | kinase                     |             |            |        |       | 0.0435 |
| Gmb                    |        | group                      |             |            |        |       | 0.044  |
| IFNG                   |        | cytokine                   | 0.43 bias   | -0.474     | 1.887  |       | 0.0454 |
| SNAI2                  |        | transcription regulator    |             |            |        |       | 0.0458 |
| TOB1                   |        | transcription regulator    |             |            |        |       | 0.0458 |
| RGS2                   |        | enzyme                     |             |            |        |       | 0.0459 |
| KLIF4                  |        | transcription regulator    | Inhibited   | -2.19 bias | -0.598 | -0.88 | 0.0461 |
| EIF2S1                 |        | translation regulator      |             |            |        |       | 0.0478 |
| NRG1                   |        | growth factor              |             |            |        |       | 0.0478 |
| ACOT13                 |        | enzyme                     |             |            |        |       | 0.0478 |
| AKAP12                 |        | transporter                |             |            |        |       | 0.0478 |
| ANK3PTL6               |        | other                      |             |            |        |       | 0.0478 |
| ANKHD1/ANKHD1-EIF4     |        | other                      |             |            |        |       | 0.0478 |
| CBR3-AS1               |        | other                      |             |            |        |       | 0.0478 |
| CCND2                  |        | other                      |             |            |        |       | 0.0478 |
| CDK5R1                 |        | kinase                     |             |            |        |       | 0.0478 |
| CTNBP1                 |        | other                      |             |            |        |       | 0.0478 |
| DLX1                   |        | transcription regulator    |             |            |        |       | 0.0478 |
| DMTF1                  |        | transcription regulator    |             |            |        |       | 0.0478 |
| EOGT                   |        | enzyme                     |             |            |        |       | 0.0478 |
| ERVW-1                 |        | other                      |             |            |        |       | 0.0478 |
| FSTL3                  |        | other                      |             |            |        |       | 0.0478 |
| GLP1R                  | -0.806 | g-protein coupled receptor |             |            |        |       | 0.0478 |
| GPAM                   |        | enzyme                     |             |            |        |       | 0.0478 |
| GUCY2C                 | -0.659 | kinase                     |             |            |        |       | 0.0478 |
| HPRT1                  |        | enzyme                     |             |            |        |       | 0.0478 |
| IGFBP7                 |        | transporter                |             |            |        |       | 0.0478 |
| MC3R                   |        | g-protein coupled receptor |             |            |        |       | 0.0478 |
| MEIT1L                 |        | enzyme                     |             |            |        |       | 0.0478 |
| MRAS                   |        | enzyme                     |             |            |        |       | 0.0478 |
| Npy4r                  |        | g-protein coupled receptor |             |            |        |       | 0.0478 |
| OBP2B                  |        | transporter                |             |            |        |       | 0.0478 |
| PDCD5                  |        | other                      |             |            |        |       | 0.0478 |
| PDC3A                  |        | enzyme                     |             |            |        |       | 0.0478 |
| PLSCR1                 |        | enzyme                     |             |            |        |       | 0.0478 |
| PRKAB1                 |        | kinase                     |             |            |        |       | 0.0478 |
| PRKG2                  |        | kinase                     |             |            |        |       | 0.0478 |
| Pdgf Ab                |        | complex                    |             |            |        |       | 0.0478 |
| SH2D5                  |        | other                      |             |            |        |       | 0.0478 |
| SLC7A11-AS1            |        | other                      |             |            |        |       | 0.0478 |
| TFE2                   |        | other                      |             |            |        |       | 0.0478 |
| VGF                    |        | growth factor              |             |            |        |       | 0.0478 |
| mir-637                |        | microma                    |             |            |        |       | 0.0478 |
| PI3K (complex)         |        | complex                    | -1.091 bias | -0.714     | 0.312  |       | 0.0486 |
| Raf                    |        | group                      |             |            |        |       | 0.0498 |
